# Supplementary material for: Joint index vector: a novel assessment measure for stratified medicine in patients with rheumatoid arthritis
Source: Springer Nature journal article supplement (doi:10.1186/s40537-018-0148-1), 2018-10-13
Supplement: MOESM1 [file 16197554]

## Sheet: patients data 2016
Age (yrs)	Disease duration (yrs)	sex	SDAI	HAQ-DI	JI upper/large	JI upper/small	JI lower/large	JI lower/small	X	Y	Z	|Vxy|	Group
61	30	male	1.83	0.75	0	0	0	0	0	0	0	0	LDA
75	3	female	3.35	0.38	0	0	0	0	0	0	0	0	LDA
78	7	male	4.94	1.38	0	0	0	0	0	0	0	0	LDA
63	10	female	2.45	0	0	0.1	0	0	0.1	0	-0.1	0.1	EVN
73	1	female	6.69	0.13	0.375	0	0.125	0	0.375	0.125	0.5	0.395285	LAR
83	11	female	0.62	1.25	0	0	0	0	0	0	0	0	LDA
75	6	female	1	0	0	0	0	0	0	0	0	0	LDA
75	5	male	5.8	0.25	0	0	0	0	0	0	0	0	LDA
59	18	female	6.15	0.25	0	0.05	0	0	0.05	0	-0.05	0.05	LDA
68	2	female	0.88	0	0	0	0	0	0	0	0	0	LDA
86	24	female	7.46	1.5	0	0.05	0	0	0.05	0	-0.05	0.05	LDA
52	12	female	0.48	0	0	0	0	0	0	0	0	0	LDA
41	27	female	10.14	0.88	0	0.25	0	0	0.25	0	-0.25	0.25	SML
70	15	female	14.01	1	0.125	0.2	0	0	0.325	0	-0.075	0.325	EVN
56	3	female	12.61	0.25	0	0.4	0	0.2	0.4	0.2	-0.6	0.447214	SML
30	27	female	2.15	2.25	0	0	0	0	0	0	0	0	LDA
42	9	female	1.14	0	0	0	0	0	0	0	0	0	LDA
78	11	female	2.85	0	0	0	0	0	0	0	0	0	LDA
43	16	female	4.5	0.38	0.125	0	0	0.4	0.125	0.4	-0.275	0.419076	SML
70	16	female	22.78	2.25	0.625	0.4	0.2	1.4	1.025	1.6	-0.975	1.90016	SML
75	19	male	1.63	0	0	0	0	0	0	0	0	0	LDA
67	5	female	1.58	0.13	0	0	0	0	0	0	0	0	LDA
51	18	female	0.72	0	0	0	0	0	0	0	0	0	LDA
67	13	female	5.23	0	0	0.15	0	0	0.15	0	-0.15	0.15	EVN
88	16	female	5.88	1.88	0	0	0	0	0	0	0	0	LDA
48	7	female	3.95	0.5	0	0	0	0	0	0	0	0	LDA
42	16	female	4.12	0.63	0	0	0	0	0	0	0	0	LDA
66	31	female	8.53	0.75	0.25	0	0	0	0.25	0	0.25	0.25	LAR
66	2	female	3.35	0.75	0	0	0	0	0	0	0	0	LDA
65	0	female	9.02	1	0.125	0	0	0	0.125	0	0.125	0.125	EVN
75	5	female	6.9	0.38	0.125	0	0	0	0.125	0	0.125	0.125	EVN
61	34	female	4.3	1	0	0	0	0	0	0	0	0	LDA
79	21	female	2.1	2.13	0	0	0	0	0	0	0	0	LDA
82	3	female	1.4	0.13	0	0	0	0	0	0	0	0	LDA
75	11	female	5.5	0.38	0	0	0.125	0	0	0.125	0.125	0.125	EVN
85	9	female	16.7	3	0	0	0	0	0	0	0	0	LDA
61	19	female	1.5	0.13	0	0	0	0	0	0	0	0	LDA
56	0	male	0.5	0	0	0	0	0	0	0	0	0	LDA
92	0	female	4	0.75	0.375	0	0	0	0.375	0	0.375	0.375	LAR
66	7	female	2.9	0	0	0	0	0	0	0	0	0	LDA
75	4	female	4.4	0	0.25	0	0	0	0.25	0	0.25	0.25	LAR
60	7	female	0.9	0	0	0	0	0	0	0	0	0	LDA
75	6	male	0.25	0	0	0	0	0	0	0	0	0	LDA
83	4	female	0.1	0	0	0	0	0	0	0	0	0	LDA
45	1	female	0.1	0	0	0	0	0	0	0	0	0	LDA
67	10	female	0.1	0	0	0	0	0	0	0	0	0	LDA
84	22	female	0.4	0	0	0	0	0	0	0	0	0	LDA
57	3	female	2.5	0	0.125	0	0	0	0.125	0	0.125	0.125	EVN
78	25	female	2	0	0	0	0	0	0	0	0	0	LDA
90	8	female	4.6	0.25	0	0	0	0	0	0	0	0	LDA
69	3	male	6.5	0	0	0	0	0	0	0	0	0	LDA
49	12	female	1	0.5	0	0	0	0	0	0	0	0	LDA
53	2	female	0.6	0	0	0	0	0	0	0	0	0	LDA
68	10	male	3.1	0	0	0	0	0	0	0	0	0	LDA
66	1	female	58.6	1	1.25	1.6	0.375	0	2.85	0.375	0.025	2.87457	EVN
71	0	female	8	0.5	0	0.05	0	0	0.05	0	-0.05	0.05	LDA
66	22	female	0.8	0	0	0	0	0	0	0	0	0	LDA
67	6	female	0.4	0	0	0	0	0	0	0	0	0	LDA
64	5	female	0.8	0	0	0	0	0	0	0	0	0	LDA
73	17	female	6.85	1.5	0	0	0	0	0	0	0	0	LDA
46	18	female	44.1	0.75	0.375	1.05	0.666667	0	1.425	0.666667	-0.00833334	1.57324	EVN
72	21	male	8.1	0.63	0.5	0	0.291667	0	0.5	0.291667	0.791667	0.578852	LAR
84	0	female	56.1	0.13	1	1.8	1.04167	2	2.8	3.04167	-1.75833	4.13422	SML
88	36	female	3.3	3	0	0	0	0	0	0	0	0	LDA
67	14	female	3.4	0	0	0.1	0	0	0.1	0	-0.1	0.1	EVN
72	30	female	11.9	0.38	0	0.2	0	0	0.2	0	-0.2	0.2	SML
80	9	male	3.5	0	0	0.1	0	0	0.1	0	-0.1	0.1	EVN
74	26	female	10.1	2.25	0.25	0.2	0	0	0.45	0	0.05	0.45	EVN
75	13	male	7.5	0.38	0	0	0	0	0	0	0	0	LDA
84	4	female	3.3	0.25	0	0	0.125	0	0	0.125	0.125	0.125	EVN
59	16	male	3.6	0	0.25	0	0	0	0.25	0	0.25	0.25	LAR
68	9	female	5.9	0	0	0	0	0	0	0	0	0	LDA
83	1	female	12	1	0.25	0	0	0	0.25	0	0.25	0.25	LAR
61	6	female	1.3	1	0	0	0	0	0	0	0	0	LDA
75	8	female	0.4	0	0	0	0	0	0	0	0	0	LDA
50	1	female	1.8	0.13	0	0	0	0	0	0	0	0	LDA
63	10	female	0.6	0	0	0	0	0	0	0	0	0	LDA
62	8	female	2.5	0	0	0	0	0	0	0	0	0	LDA
81	22	female	5.9	1.13	0	0	0	0	0	0	0	0	LDA
82	8	male	21.7	0.75	0.5	0.6	0	0	1.1	0	-0.1	1.1	EVN
41	8	female	1.4	0	0	0	0	0	0	0	0	0	LDA
75	8	female	1.2	0	0	0	0	0	0	0	0	0	LDA
47	4	female	0.1	0	0	0	0	0	0	0	0	0	LDA
53	3	female	1.9	0.13	0	0	0	0	0	0	0	0	LDA
67	8	female	0.55	0.38	0	0	0	0	0	0	0	0	LDA
52	12	female	5	0	0.125	0	0	0	0.125	0	0.125	0.125	EVN
70	41	female	3.5	1	0.125	0	0.125	0	0.125	0.125	0.25	0.176777	LAR
74	7	female	3.6	0.13	0.125	0	0.291667	0	0.125	0.291667	0.416667	0.317324	LAR
81	1	female	8.6	0.38	0	0	0	0	0	0	0	0	LDA
77	18	female	2.2	0.38	0	0.05	0	0	0.05	0	-0.05	0.05	LDA
26	10	female	3.3	0.38	0	0	0	0	0	0	0	0	LDA
38	0	female	7.95	0	0.125	0.1	0.291667	0.2	0.225	0.491667	0.116667	0.540704	EVN
51	6	female	0.4	0	0	0	0	0	0	0	0	0	LDA
72	5	female	11.9	0.25	0	0.45	0	0	0.45	0	-0.45	0.45	SML
50	6	male	0.55	0	0	0	0	0	0	0	0	0	LDA
47	6	female	0.8	0	0	0	0	0	0	0	0	0	LDA
73	1	male	0.7	0	0	0	0.166667	0	0	0.166667	0.166667	0.166667	EVN
67	5	female	2.5	0.13	0	0	0	0	0	0	0	0	LDA
56	6	female	1.2	0.25	0	0	0.25	0	0	0.25	0.25	0.25	LAR
84	6	female	3.8	2	0	0	0	0	0	0	0	0	LDA
45	22	female	5.9	0	0	0.15	0	0	0.15	0	-0.15	0.15	EVN
37	7	male	1.4	0	0	0	0	0	0	0	0	0	LDA
73	5	male	0.4	0	0	0	0	0	0	0	0	0	LDA
57	24	female	42.4	1	1	1.25	0.583333	0	2.25	0.583333	0.333333	2.32439	LAR
66	13	female	0.3	0	0	0	0	0	0	0	0	0	LDA
49	4	female	0.5	0	0	0	0	0	0	0	0	0	LDA
46	4	female	1.3	0	0	0	0	0	0	0	0	0	LDA
81	7	female	3.2	0.5	0	0	0	0	0	0	0	0	LDA
54	5	female	0.65	0	0	0	0	0	0	0	0	0	LDA
38	4	female	1.9	0	0	0	0	0	0	0	0	0	LDA
68	4	female	7.3	0.75	0	0.2	0	0	0.2	0	-0.2	0.2	SML
74	5	female	4.4	0.13	0	0	0	0	0	0	0	0	LDA
37	4	female	0.1	0	0	0	0	0	0	0	0	0	LDA
56	7	female	4.4	0.25	0.375	0	0	0	0.375	0	0.375	0.375	LAR
76	3	male	6.9	0.13	0	0	0.125	0	0	0.125	0.125	0.125	EVN
69	4	female	1.2	0	0	0	0	0	0	0	0	0	LDA
74	4	female	9.8	0.25	0	0.3	0.333333	0	0.3	0.333333	0.0333333	0.448454	EVN
77	23	male	1.7	0	0	0	0	0	0	0	0	0	LDA
53	7	male	2.2	0	0	0	0	0	0	0	0	0	LDA
62	6	female	13.2	0	0.25	0.25	0.375	0	0.5	0.375	0.375	0.625	LAR
74	3	female	0.7	0	0	0	0	0	0	0	0	0	LDA
43	3	female	0.1	0	0	0	0	0	0	0	0	0	LDA
86	3	female	0.6	0.25	0	0	0	0	0	0	0	0	LDA
87	3	female	0.3	1.63	0	0	0	0	0	0	0	0	LDA
76	2	female	5.3	0	0	0.15	0	0	0.15	0	-0.15	0.15	EVN
75	1	female	10.1	1	0.5	0	0.125	0	0.5	0.125	0.625	0.515388	LAR
64	0	male	3.3	0	0	0.1	0	0	0.1	0	-0.1	0.1	EVN
87	3	male	4.6	0.25	0	0.1	0	0	0.1	0	-0.1	0.1	EVN
56	3	female	2.3	0.38	0	0.05	0	0	0.05	0	-0.05	0.05	LDA
39	4	male	0.1	0	0	0	0	0	0	0	0	0	LDA
47	2	female	12.8	0	0	0.1	0.125	0	0.1	0.125	0.025	0.160078	EVN
76	0	female	9.2	0.5	0.5	0	0	0	0.5	0	0.5	0.5	LAR
84	14	female	4.1	1.38	0	0	0	0	0	0	0	0	LDA
59	5	female	1	0.63	0	0	0	0	0	0	0	0	LDA
43	2	female	2	0	0	0	0	0	0	0	0	0	LDA
74	1	male	1.3	0	0	0	0	0	0	0	0	0	LDA
73	1	female	1.2	0	0	0	0	0	0	0	0	0	LDA
43	20	female	6	1.63	0	0	0.125	0	0	0.125	0.125	0.125	EVN
42	10	female	0.5	0	0	0	0	0	0	0	0	0	LDA
49	6	female	3.7	0.25	0	0	0	0	0	0	0	0	LDA
63	7	male	3.4	0	0	0	0	0	0	0	0	0	LDA
77	1	male	1.6	0	0	0	0	0	0	0	0	0	LDA
66	7	female	4.6	0	0	0.15	0	0	0.15	0	-0.15	0.15	EVN
49	0	female	2	0.13	0	0	0	0	0	0	0	0	LDA
52	0	female	0.4	0	0	0	0	0	0	0	0	0	LDA
81	0	male	18.4	2.38	0.5	0	0	0	0.5	0	0.5	0.5	LAR
68	6	female	1	0.13	0	0	0	0	0	0	0	0	LDA
84	8	female	0.4	2.38	0	0	0	0	0	0	0	0	LDA
73	1	female	0.3	0.38	0	0	0	0	0	0	0	0	LDA
72	8	female	7.03	0	0	0.1	0	0.2	0.1	0.2	-0.3	0.223607	SML
61	16	male	14.67	1.5	0.125	0.2	0.375	1	0.325	1.375	-0.7	1.41289	SML
55	23	female	4.92	0.5	0	0.2	0.166667	0.2	0.2	0.366667	-0.233333	0.417665	SML
73	46	female	3.68	2.75	0	0	0	0	0	0	0	0	LDA
83	56	female	6.44	3	0	0	0.333333	0	0	0.333333	0.333333	0.333333	LAR
80	11	male	11.42	2.5	0.25	0	0.125	0.1	0.25	0.225	0.275	0.336341	LAR
68	48	female	5.3	1	0	0	0	0	0	0	0	0	LDA
75	35	female	15.88	1.88	0.5	0.1	0.25	0.1	0.6	0.35	0.55	0.694622	LAR
66	36	female	2.5	0.63	0	0	0	0	0	0	0	0	LDA
64	44	female	6.61	1	0	0	0	0	0	0	0	0	LDA
71	45	male	9.16	1.88	0	0	0	1	0	1	-1	1	SML
75	40	female	17.86	1.63	0.25	0	0.291667	0	0.25	0.291667	0.541667	0.384148	LAR
74	52	female	3.3	0.75	0	0	0.166667	0	0	0.166667	0.166667	0.166667	EVN
87	39	female	9.51	2.13	0	0	0	0	0	0	0	0	LDA
73	18	female	1.94	0.13	0	0	0	0	0	0	0	0	LDA
76	41	female	4.42	2.5	0	0	0	0	0	0	0	0	LDA
84	46	female	6.54	2.25	0	0	0	0	0	0	0	0	LDA
75	56	female	7.35	1.38	0	0	0	0	0	0	0	0	LDA
77	39	female	3.82	1.13	0	0.05	0	0	0.05	0	-0.05	0.05	LDA
64	41	female	11.35	2.75	0.125	0	0.125	0	0.125	0.125	0.25	0.176777	LAR
77	34	female	5.92	2.88	0	0	0.125	0	0	0.125	0.125	0.125	EVN
82	58	female	3.99	2.75	0	0	0.333333	0	0	0.333333	0.333333	0.333333	LAR
66	39	female	2.53	1.25	0	0	0	0	0	0	0	0	LDA
69	44	female	5.24	2.75	0	0	0	0	0	0	0	0	LDA
84	39	female	7.59	1.13	0.5	0	0	0	0.5	0	0.5	0.5	LAR
76	36	female	10.49	2	0	0.15	0	0	0.15	0	-0.15	0.15	EVN
91	39	female	6.24	2.75	0	0	0	0	0	0	0	0	LDA
89	66	female	9.17	1.63	0	0	0	0	0	0	0	0	LDA
69	34	female	11.14	2	0.125	0	0.25	0	0.125	0.25	0.375	0.279508	LAR
82	41	female	0.26	0.25	0	0	0	0	0	0	0	0	LDA
82	40	female	13.36	2.75	0.25	0.1	0	0	0.35	0	0.15	0.35	EVN
74	38	female	15.79	1	0.25	0.3	0	0	0.55	0	-0.05	0.55	EVN
63	12	female	0.98	0.75	0	0	0.25	0	0	0.25	0.25	0.25	LAR
61	7	female	17.72	0.13	0.125	0.05	0.125	0	0.175	0.125	0.2	0.215058	EVN
73	41	female	2.34	0.13	0	0	0	0	0	0	0	0	LDA
78	48	female	9.75	0.75	0	0.1	0	0	0.1	0	-0.1	0.1	EVN
81	7	female	0.49	0.13	0	0	0	0	0	0	0	0	LDA
69	35	female	4.54	2.38	0	0.05	0	0	0.05	0	-0.05	0.05	LDA
64	37	female	2.34	0.13	0	0	0	0	0	0	0	0	LDA
65	48	female	18.62	2	0.5	0.2	0.25	0	0.7	0.25	0.55	0.743303	LAR
75	46	female	9.91	1.63	0.125	0	0	0	0.125	0	0.125	0.125	EVN
84	54	female	7.94	2	0.25	0.1	0	0.1	0.35	0.1	0.05	0.364005	EVN
74	15	female	4.8	0	0.25	0	0	0	0.25	0	0.25	0.25	LAR
75	48	male	9.62	1.88	0	0	0.125	0	0	0.125	0.125	0.125	EVN
64	42	female	6.68	2.13	0	0	0	0	0	0	0	0	LDA
71	34	female	8.75	1.25	0.125	0	0.125	0	0.125	0.125	0.25	0.176777	LAR
80	40	male	7.83	1.75	0.25	0	0	0	0.25	0	0.25	0.25	LAR
70	42	female	3.87	0.13	0	0	0	0	0	0	0	0	LDA
74	34	female	6.95	0.75	0	0	0	0.8	0	0.8	-0.8	0.8	SML
76	35	female	6.27	2.25	0	0	0	0	0	0	0	0	LDA
73	19	female	0.74	0.13	0	0	0	0	0	0	0	0	LDA
72	34	female	0.81	0.38	0	0	0	0	0	0	0	0	LDA
76	38	female	1.1	2.13	0	0	0	0	0	0	0	0	LDA
79	40	female	6.11	0.13	0	0.15	0	0	0.15	0	-0.15	0.15	EVN
68	21	female	4.54	0	0.25	0	0	0	0.25	0	0.25	0.25	LAR
83	38	female	1.67	0	0	0	0	0	0	0	0	0	LDA
46	1	female	13.7	0.38	0.25	0.2	0	0.2	0.45	0.2	-0.15	0.492443	EVN
81	22	female	3.28	0	0.125	0	0	0	0.125	0	0.125	0.125	EVN
78	36	female	7.94	0.5	0	0.1	0	0	0.1	0	-0.1	0.1	EVN
80	23	female	4.99	2	0	0	0.166667	0	0	0.166667	0.166667	0.166667	EVN
45	33	female	7.35	1.38	0.25	0	0	0	0.25	0	0.25	0.25	LAR
67	16	female	0.97	0	0	0	0	0	0	0	0	0	LDA
73	10	female	0.96	0	0	0	0	0	0	0	0	0	LDA
67	8	female	1.6	0	0	0	0	0	0	0	0	0	LDA
48	33	male	2.74	0.13	0.125	0	0	0	0.125	0	0.125	0.125	EVN
82	33	female	2.4	2.75	0	0	0	0	0	0	0	0	LDA
72	2	male	1.79	0.13	0	0	0	0	0	0	0	0	LDA
85	18	female	8.04	1.25	0	0.05	0.291667	0	0.05	0.291667	0.241667	0.295921	LAR
77	1	female	9.85	0.13	0.125	0.15	0	0	0.275	0	-0.025	0.275	EVN
76	51	female	0.87	2.63	0	0	0	0	0	0	0	0	LDA
80	3	female	1.16	0	0	0	0	0	0	0	0	0	LDA
79	34	female	0.46	0	0	0	0	0	0	0	0	0	LDA
63	7	female	0.23	0	0	0	0	0	0	0	0	0	LDA
73	14	female	10.34	1.13	0	0.25	0	0	0.25	0	-0.25	0.25	SML
70	10	male	2.45	1	0	0	0	0	0	0	0	0	LDA
78	25	female	16.76	1.13	0	0.35	0	0	0.35	0	-0.35	0.35	SML
78	38	female	7.01	2.5	0	0	0.125	0	0	0.125	0.125	0.125	EVN
77	47	female	4.58	2.88	0.125	0	0.25	0	0.125	0.25	0.375	0.279508	LAR
71	40	female	1.18	0	0	0	0	0	0	0	0	0	LDA
64	16	female	1.38	0.38	0.125	0	0	0	0.125	0	0.125	0.125	EVN
70	47	female	8.28	1.38	0	0	0	0	0	0	0	0	LDA
69	41	female	6.14	2.75	0	0	0	0	0	0	0	0	LDA
72	37	female	6.53	1	0	0	0	0	0	0	0	0	LDA
72	38	female	4.13	0.13	0	0	0	0	0	0	0	0	LDA
67	48	female	1.23	1.13	0	0	0	0	0	0	0	0	LDA
73	41	female	8.66	1.88	0	0	0.125	0	0	0.125	0.125	0.125	EVN
82	9	female	2.21	0.5	0	0	0	0	0	0	0	0	LDA
68	4	female	4.03	0.13	0	0	0	0	0	0	0	0	LDA
70	20	female	4.11	1	0	0	0	0	0	0	0	0	LDA
76	5	female	6.79	0.25	0	0.1	0	0	0.1	0	-0.1	0.1	EVN
67	28	female	3.61	1.38	0	0	0	0	0	0	0	0	LDA
82	3	female	1.52	0.38	0	0	0	0	0	0	0	0	LDA
62	40	female	2.67	1.63	0	0	0	0	0	0	0	0	LDA
62	4	male	2.18	0	0	0	0	0	0	0	0	0	LDA
72	25	female	5.24	2.5	0	0	0	0	0	0	0	0	LDA
65	37	female	11.48	2.88	0	0	0.25	0	0	0.25	0.25	0.25	LAR
81	4	female	5.87	0	0.125	0	0	0	0.125	0	0.125	0.125	EVN
55	14	female	24.04	0.75	0.5	0.3	0.25	0	0.8	0.25	0.45	0.838153	LAR
48	46	female	6.66	0.13	0	0.05	0	0	0.05	0	-0.05	0.05	LDA
80	33	female	5.31	1.13	0	0	0	0	0	0	0	0	LDA
75	20	female	1.52	0	0	0	0	0	0	0	0	0	LDA
84	33	female	4.75	1.38	0	0	0	0	0	0	0	0	LDA
72	44	female	8.68	1.13	0	0	0.333333	0	0	0.333333	0.333333	0.333333	LAR
73	38	female	3.32	0	0	0	0.125	0	0	0.125	0.125	0.125	EVN
70	42	female	3.71	0.63	0.25	0	0	0	0.25	0	0.25	0.25	LAR
63	10	female	3.02	0	0	0.1	0	0	0.1	0	-0.1	0.1	EVN
74	33	female	4.86	0.38	0	0	0	0	0	0	0	0	LDA
76	32	female	11.1	2.63	0	0.2	0	0	0.2	0	-0.2	0.2	SML
67	33	female	8.97	1.38	0	0	0	0	0	0	0	0	LDA
81	20	male	7.21	0	0.5	0	0	0	0.5	0	0.5	0.5	LAR
88	42	female	5.25	0.88	0	0	0	0	0	0	0	0	LDA
80	3	female	17.13	0.13	0.25	0.2	0	0	0.45	0	0.05	0.45	EVN
69	4	female	1.16	0	0	0	0	0	0	0	0	0	LDA
59	2	female	3.42	0	0	0.1	0	0	0.1	0	-0.1	0.1	EVN
82	7	female	8.81	1.38	0	0	0.125	0	0	0.125	0.125	0.125	EVN
76	18	female	1.65	0	0	0	0	0	0	0	0	0	LDA
57	5	female	4.92	0.75	0.125	0	0	0	0.125	0	0.125	0.125	EVN
63	34	female	3.45	2.13	0	0	0	0	0	0	0	0	LDA
84	11	female	0.23	0.13	0	0	0	0	0	0	0	0	LDA
82	7	female	8.92	0.38	0.125	0	0	0	0.125	0	0.125	0.125	EVN
84	11	female	5.85	2.88	0	0	0	0	0	0	0	0	LDA
85	34	female	3.74	1	0	0	0	0	0	0	0	0	LDA
73	4	female	5.99	0.5	0	0	0.125	0	0	0.125	0.125	0.125	EVN
63	38	female	6.72	0	0	0.15	0	0	0.15	0	-0.15	0.15	EVN
69	43	female	6.65	2.88	0	0	0.125	0	0	0.125	0.125	0.125	EVN
69	9	female	5.09	0.75	0	0.05	0.125	0	0.05	0.125	0.075	0.134629	EVN
71	19	male	1.39	0.13	0	0	0	0	0	0	0	0	LDA
70	15	male	17.35	1	0.25	0.1	0.583333	0	0.35	0.583333	0.733333	0.680278	LAR
68	33	female	4.51	0.38	0	0	0.291667	0	0	0.291667	0.291667	0.291667	LAR
78	32	female	16.68	2.13	0	0	0.5	0	0	0.5	0.5	0.5	LAR
73	37	female	9.39	2.88	0	0	0	0	0	0	0	0	LDA
70	16	female	18.92	1.63	0.5	0.2	0.375	1	0.7	1.375	-0.325	1.54293	SML
75	33	female	6.67	0.38	0.125	0	0	0	0.125	0	0.125	0.125	EVN
74	13	female	20.21	0.75	0	0.5	0.125	0.6	0.5	0.725	-0.975	0.880696	SML
65	6	male	0.57	0	0	0	0	0	0	0	0	0	LDA
77	31	male	2.42	0	0	0	0	0	0	0	0	0	LDA
89	33	male	4.23	3	0	0	0	0	0	0	0	0	LDA
72	10	female	3.34	0	0	0	0	0	0	0	0	0	LDA
76	15	female	7.18	0.63	0.25	0.05	0.125	0.1	0.3	0.225	0.225	0.375	LAR
72	22	female	17.36	2.38	0	0.25	0	0	0.25	0	-0.25	0.25	SML
81	25	female	11.91	3	0	0	0.333333	0	0	0.333333	0.333333	0.333333	LAR
72	32	female	3.86	2	0	0	0	0	0	0	0	0	LDA
75	29	female	0.72	0.25	0	0	0	0	0	0	0	0	LDA
83	2	male	5.79	1	0.25	0	0	0	0.25	0	0.25	0.25	LAR
73	22	female	8.57	2.88	0.125	0.05	0	0	0.175	0	0.075	0.175	EVN
84	23	female	1.47	2	0	0	0	0	0	0	0	0	LDA
32	9	female	10.14	0.13	0.625	0	0	0	0.625	0	0.625	0.625	LAR
58	12	female	9.65	1.25	0.25	0	0.125	0	0.25	0.125	0.375	0.279508	LAR
67	19	female	0.55	0.38	0	0	0	0	0	0	0	0	LDA
56	36	female	4.62	1	0	0	0	0	0	0	0	0	LDA
75	4	female	7.96	0	0.125	0	0	0	0.125	0	0.125	0.125	EVN
75	32	female	6.44	0	0	0	0	0	0	0	0	0	LDA
77	18	female	12.13	0.13	0.25	0.15	0	0	0.4	0	0.1	0.4	EVN
86	36	female	8.48	3	0	0	0	0	0	0	0	0	LDA
68	20	female	10.28	0.5	0.25	0.05	0.125	0	0.3	0.125	0.325	0.325	LAR
73	37	female	2.52	0.25	0	0	0	0	0	0	0	0	LDA
72	32	female	14.29	2.63	0.5	0	0.125	0	0.5	0.125	0.625	0.515388	LAR
81	11	male	18.77	0.38	0.125	0.3	0.375	0.5	0.425	0.875	-0.3	0.972754	SML
65	6	female	10.57	0	0	0	0.25	0	0	0.25	0.25	0.25	LAR
67	38	female	4.94	0.5	0	0	0.25	0	0	0.25	0.25	0.25	LAR
75	37	female	11.74	1.13	0	0.1	0	0.1	0.1	0.1	-0.2	0.141421	SML
82	31	female	9.47	1	0.25	0	0	0	0.25	0	0.25	0.25	LAR
74	32	female	11.6	0.38	0	0.35	0	0	0.35	0	-0.35	0.35	SML
86	16	female	10.89	1.5	0.125	0.1	0	0	0.225	0	0.025	0.225	EVN
79	48	female	10.02	0.88	0.375	0.1	0	0	0.475	0	0.275	0.475	LAR
71	32	female	6.68	0.75	0	0.1	0	0	0.1	0	-0.1	0.1	EVN
71	9	female	7.17	0.13	0	0.1	0	0	0.1	0	-0.1	0.1	EVN
70	12	female	0.83	0.13	0	0	0	0	0	0	0	0	LDA
70	17	female	0.17	0	0	0	0	0	0	0	0	0	LDA
74	17	female	5.72	0.13	0	0	0	0	0	0	0	0	LDA
76	32	female	6.1	1.38	0	0	0	0	0	0	0	0	LDA
80	12	female	4.18	1.5	0	0	0	0.2	0	0.2	-0.2	0.2	SML
77	27	female	9.18	0.63	0.25	0	0.291667	0.5	0.25	0.791667	0.0416667	0.830202	EVN
66	11	female	0.59	0.38	0	0	0	0	0	0	0	0	LDA
70	17	female	6.38	0.63	0	0	0	0	0	0	0	0	LDA
84	8	female	21.34	1.38	0.625	0.1	0.25	0	0.725	0.25	0.775	0.766893	LAR
73	8	female	9.06	2.13	0.5	0	0	0	0.5	0	0.5	0.5	LAR
51	15	female	1.8	0.25	0	0	0	0	0	0	0	0	LDA
64	10	female	12.32	0.38	0.25	0	0	0	0.25	0	0.25	0.25	LAR
75	28	female	5.92	2.5	0	0	0	0	0	0	0	0	LDA
79	32	female	8.83	3	0	0	0	0	0	0	0	0	LDA
71	8	female	10.51	0.25	0.125	0.1	0	0	0.225	0	0.025	0.225	EVN
62	6	female	1.77	0.5	0	0	0	0	0	0	0	0	LDA
64	32	female	8.14	3	0.125	0	0.125	0	0.125	0.125	0.25	0.176777	LAR
67	38	female	12.69	1.13	0.25	0	0.125	0	0.25	0.125	0.375	0.279508	LAR
68	10	female	5.3	0.5	0	0	0	0	0	0	0	0	LDA
60	41	female	8.47	0.38	0.375	0.05	0	0	0.425	0	0.325	0.425	LAR
75	17	female	14.72	1.25	0.375	0.25	0.125	0.1	0.625	0.225	0.15	0.664267	EVN
67	31	female	4.67	0.75	0.125	0	0	0	0.125	0	0.125	0.125	EVN
79	9	male	10.98	1.25	0.25	0	0.125	0	0.25	0.125	0.375	0.279508	LAR
75	36	female	12.22	2.38	0.375	0	0	0	0.375	0	0.375	0.375	LAR
62	8	female	3.93	0.75	0	0	0	0	0	0	0	0	LDA
82	5	female	1.54	0.75	0	0	0	0	0	0	0	0	LDA
69	44	female	4.32	2.88	0	0	0	0	0	0	0	0	LDA
80	31	female	6.41	0.5	0.125	0	0	0	0.125	0	0.125	0.125	EVN
78	38	female	7.31	0.38	0	0	0	0	0	0	0	0	LDA
68	31	male	1.63	0	0	0	0	0	0	0	0	0	LDA
65	31	female	18.02	0.25	0.25	0.25	0	0	0.5	0	0	0.5	EVN
58	30	female	1.87	0	0	0	0	0	0	0	0	0	LDA
67	30	female	2.85	2.5	0	0	0	0	0	0	0	0	LDA
64	33	female	0.07	0.25	0	0	0	0	0	0	0	0	LDA
80	30	female	10.05	0.38	0.25	0.05	0	0	0.3	0	0.2	0.3	EVN
73	33	female	8.81	2.13	0.25	0	0	0	0.25	0	0.25	0.25	LAR
41	23	female	3.32	0	0	0	0	0	0	0	0	0	LDA
67	30	female	3.94	1.63	0	0	0	0	0	0	0	0	LDA
70	20	female	9.48	0.25	0.25	0.2	0	0	0.45	0	0.05	0.45	EVN
69	32	female	0.46	0	0	0	0	0	0	0	0	0	LDA
65	14	female	1.03	0	0	0	0	0	0	0	0	0	LDA
73	4	male	2.3	0	0	0	0	0	0	0	0	0	LDA
57	21	female	4.13	2.25	0	0	0	0	0	0	0	0	LDA
80	16	male	5.5	0	0.125	0.1	0	0	0.225	0	0.025	0.225	EVN
79	32	female	16.79	1.38	0.5	0.1	0.583333	0.2	0.6	0.783333	0.783333	0.986717	LAR
62	30	male	17.55	0	0.25	0.3	0	0	0.55	0	-0.05	0.55	EVN
78	30	female	15.52	1.5	0	0.3	0	0	0.3	0	-0.3	0.3	SML
70	9	female	0.25	0	0	0	0	0	0	0	0	0	LDA
82	2	female	1.46	0.63	0	0	0	0	0	0	0	0	LDA
66	14	female	7.45	0.88	0.25	0	0	0	0.25	0	0.25	0.25	LAR
89	25	female	0.22	0	0	0	0	0	0	0	0	0	LDA
72	51	female	16.18	3	0.375	0	0	0	0.375	0	0.375	0.375	LAR
61	21	female	5.96	0.38	0	0.1	0	0.2	0.1	0.2	-0.3	0.223607	SML
77	22	female	1.49	0	0	0	0	0	0	0	0	0	LDA
76	11	male	9.84	3	0	0	0	0	0	0	0	0	LDA
65	30	female	1.78	0.63	0	0	0	0	0	0	0	0	LDA
42	30	female	1.8	0.88	0	0.05	0	0	0.05	0	-0.05	0.05	LDA
61	26	female	14.35	1.63	0.25	0	0.125	0	0.25	0.125	0.375	0.279508	LAR
73	30	female	8.47	0.25	0.125	0.25	0	0.2	0.375	0.2	-0.325	0.425	SML
74	9	female	3.22	0.25	0	0	0	0	0	0	0	0	LDA
68	30	female	2.65	0.25	0	0	0	0	0	0	0	0	LDA
80	8	female	1.82	0.5	0	0	0	0	0	0	0	0	LDA
76	36	female	4.17	1.13	0	0	0	0	0	0	0	0	LDA
67	29	female	6.91	0.13	0.25	0	0	0	0.25	0	0.25	0.25	LAR
67	25	female	20.38	2.5	0.5	0	0.5	0.6	0.5	1.1	0.4	1.2083	LAR
68	9	female	8.05	0	0.125	0.05	0.291667	0	0.175	0.291667	0.366667	0.340139	LAR
57	10	female	10.08	1.63	0	0	0.125	0	0	0.125	0.125	0.125	EVN
53	30	male	2.11	0	0	0	0	0	0	0	0	0	LDA
67	32	female	4.04	0	0.25	0	0	0	0.25	0	0.25	0.25	LAR
34	9	female	0.59	0	0	0	0	0	0	0	0	0	LDA
72	29	female	4.35	1	0	0	0	0	0	0	0	0	LDA
75	29	female	2.46	0.5	0	0	0	0	0	0	0	0	LDA
75	11	female	11.28	0.63	0	0.1	0.166667	0	0.1	0.166667	0.0666667	0.194365	EVN
56	13	female	10.44	0.5	0.125	0.1	0	0	0.225	0	0.025	0.225	EVN
78	22	male	5.87	1	0	0	0	0	0	0	0	0	LDA
71	29	female	3.82	0	0	0.05	0	0	0.05	0	-0.05	0.05	LDA
67	10	female	18.86	0.13	0.625	0.25	0.125	0.2	0.875	0.325	0.3	0.933408	LAR
46	29	female	12.98	2	0.125	0	0	0	0.125	0	0.125	0.125	EVN
68	14	female	11.07	0.63	0.25	0	0	0	0.25	0	0.25	0.25	LAR
72	30	female	0.73	0.75	0	0	0	0	0	0	0	0	LDA
78	29	female	15.9	1.75	0	0	0	0	0	0	0	0	LDA
73	30	female	10.45	0	0	0	0.125	0	0	0.125	0.125	0.125	EVN
73	29	female	18.44	1.5	0.375	0.4	0	0.5	0.775	0.5	-0.525	0.922293	SML
63	30	female	2.35	1.75	0	0.05	0	0	0.05	0	-0.05	0.05	LDA
54	15	female	11.76	0	0.125	0.1	0	0	0.225	0	0.025	0.225	EVN
67	39	female	14.54	1.88	0	0.3	0	0	0.3	0	-0.3	0.3	SML
66	25	female	3.54	1.75	0	0	0.291667	0	0	0.291667	0.291667	0.291667	LAR
46	29	female	21.78	0.25	0	0.65	0	0	0.65	0	-0.65	0.65	SML
66	2	female	0.6	0	0	0	0	0	0	0	0	0	LDA
78	26	female	9.78	1.63	0	0	0.166667	0.2	0	0.366667	-0.0333333	0.366667	EVN
43	4	female	4.31	0	0	0	0.416667	0	0	0.416667	0.416667	0.416667	LAR
64	11	female	1.86	0	0.125	0	0	0	0.125	0	0.125	0.125	EVN
62	35	female	5.87	1.63	0	0	0	0	0	0	0	0	LDA
62	12	female	2.59	0	0	0	0	0	0	0	0	0	LDA
67	40	female	10.22	1.75	0.25	0	0	0	0.25	0	0.25	0.25	LAR
59	11	female	8.87	1.13	0	0.1	0	0	0.1	0	-0.1	0.1	EVN
68	10	female	0.1	0.25	0	0	0	0	0	0	0	0	LDA
56	27	female	3.49	0.75	0	0	0	0	0	0	0	0	LDA
71	3	female	9.36	0	0	0	0.25	0	0	0.25	0.25	0.25	LAR
73	45	female	9.02	0.75	0.25	0	0	0	0.25	0	0.25	0.25	LAR
78	29	female	5.26	1.38	0.125	0	0	0	0.125	0	0.125	0.125	EVN
64	15	female	1.28	0	0	0	0	0	0	0	0	0	LDA
68	29	female	5.29	0.38	0	0.1	0	0	0.1	0	-0.1	0.1	EVN
77	31	female	3.91	1	0	0	0	0	0	0	0	0	LDA
58	33	female	3.63	0.38	0	0	0	0	0	0	0	0	LDA
73	10	female	8.84	0	0.25	0	0	0	0.25	0	0.25	0.25	LAR
67	41	female	10.86	2.13	0.125	0	0	0	0.125	0	0.125	0.125	EVN
66	9	female	2.41	0.5	0	0	0	0	0	0	0	0	LDA
60	27	female	3.12	1	0	0	0	0	0	0	0	0	LDA
71	29	female	2.09	0	0	0	0.125	0	0	0.125	0.125	0.125	EVN
65	22	female	4.96	0.63	0.25	0	0	0	0.25	0	0.25	0.25	LAR
59	5	female	1.15	0	0	0	0	0	0	0	0	0	LDA
69	13	female	0.81	0	0	0	0	0	0	0	0	0	LDA
71	3	female	10.54	0	0	0.2	0	0	0.2	0	-0.2	0.2	SML
62	13	female	19.87	2.25	0.5	0.2	0	0	0.7	0	0.3	0.7	LAR
74	53	female	9.09	3	0.125	0	0	0	0.125	0	0.125	0.125	EVN
65	30	female	1.93	0.38	0	0	0	0	0	0	0	0	LDA
76	9	female	0.73	0	0	0	0	0	0	0	0	0	LDA
76	33	female	5.45	1	0	0	0	0	0	0	0	0	LDA
72	38	female	12.25	2	0.125	0	0.25	0	0.125	0.25	0.375	0.279508	LAR
50	11	female	0.85	0	0	0	0	0	0	0	0	0	LDA
76	19	female	0.03	0	0	0	0	0	0	0	0	0	LDA
56	40	female	4.8	2.5	0	0	0.333333	0	0	0.333333	0.333333	0.333333	LAR
69	41	female	3.45	0.13	0	0	0	0	0	0	0	0	LDA
73	20	female	4.25	1.5	0	0	0	0	0	0	0	0	LDA
83	5	female	5.65	1.88	0.125	0	0	0	0.125	0	0.125	0.125	EVN
76	10	female	5.7	0	0.5	0	0	0	0.5	0	0.5	0.5	LAR
74	36	female	3.32	0.38	0.125	0	0.291667	0	0.125	0.291667	0.416667	0.317324	LAR
71	29	female	2.64	2.13	0	0	0	0	0	0	0	0	LDA
63	25	female	6.91	0.13	0	0.2	0	0	0.2	0	-0.2	0.2	SML
88	14	female	20.11	2.13	0.5	0.15	0	0	0.65	0	0.35	0.65	LAR
77	43	female	11.71	0.38	0.125	0	0.125	0	0.125	0.125	0.25	0.176777	LAR
78	41	male	18.26	1.38	0.5	0.05	0	0	0.55	0	0.45	0.55	LAR
72	14	male	3.07	0	0	0	0	0	0	0	0	0	LDA
83	22	female	9.73	0.25	0.375	0	0	0	0.375	0	0.375	0.375	LAR
85	28	female	1.45	0	0	0	0	0	0	0	0	0	LDA
75	30	female	0.2	0	0	0	0	0	0	0	0	0	LDA
76	26	female	2.34	0.5	0	0	0	0	0	0	0	0	LDA
69	11	male	8.97	0	0	0	0	0	0	0	0	0	LDA
92	16	female	12.34	0.88	0	0	0.25	0	0	0.25	0.25	0.25	LAR
81	14	female	2.2	1.63	0	0	0	0	0	0	0	0	LDA
65	29	female	19.05	2.5	0.625	0.1	0.125	0	0.725	0.125	0.65	0.735697	LAR
75	20	female	8.49	1.5	0.25	0	0	0	0.25	0	0.25	0.25	LAR
76	27	female	3.21	0.25	0	0	0	0	0	0	0	0	LDA
70	8	female	4.99	1.38	0	0	0	0	0	0	0	0	LDA
77	28	female	6.99	2.38	0	0	0	0	0	0	0	0	LDA
61	13	female	7.17	1.75	0.25	0	0	0	0.25	0	0.25	0.25	LAR
66	16	female	2.89	0.25	0	0	0	0	0	0	0	0	LDA
78	11	female	9.43	2	0	0	0.291667	0	0	0.291667	0.291667	0.291667	LAR
49	26	female	10.96	0.25	0.25	0	0	0	0.25	0	0.25	0.25	LAR
79	38	female	4.98	1.88	0	0	0	0	0	0	0	0	LDA
75	31	female	1.73	0.38	0	0	0	0	0	0	0	0	LDA
67	14	female	2.5	0.5	0	0	0	0	0	0	0	0	LDA
73	1	female	9.28	0.38	0.375	0	0.125	0	0.375	0.125	0.5	0.395285	LAR
81	40	female	18.06	3	0	0.2	0.375	0.9	0.2	1.275	-0.725	1.29059	SML
64	32	female	6.24	0.38	0	0.1	0.125	0	0.1	0.125	0.025	0.160078	EVN
69	28	female	6.37	1.25	0.125	0	0	0	0.125	0	0.125	0.125	EVN
76	26	female	13.5	0.88	0.5	0.1	0	0	0.6	0	0.4	0.6	LAR
72	12	female	6.19	0.13	0	0	0.25	0	0	0.25	0.25	0.25	LAR
65	2	female	5.96	0	0.25	0	0	0	0.25	0	0.25	0.25	LAR
91	38	female	0.5	0.5	0	0	0	0	0	0	0	0	LDA
63	0	male	15.2	0.25	0.375	0.15	0.375	0.5	0.525	0.875	0.1	1.02042	EVN
73	35	female	7.34	1.38	0.125	0.1	0.166667	0	0.225	0.166667	0.191667	0.280005	EVN
69	26	female	14.32	1.75	0.25	0.1	0	0	0.35	0	0.15	0.35	EVN
68	2	female	4.36	0.13	0	0.1	0	0	0.1	0	-0.1	0.1	EVN
67	26	female	1.42	0.13	0	0	0	0	0	0	0	0	LDA
89	8	female	6.56	0.38	0.25	0	0	0	0.25	0	0.25	0.25	LAR
74	26	female	19.59	0	0.25	0.4	0	0	0.65	0	-0.15	0.65	EVN
69	14	female	0.33	0.5	0	0	0	0	0	0	0	0	LDA
70	10	female	22.6	0.88	0.25	0.5	0.75	0	0.75	0.75	0.5	1.06066	LAR
79	25	female	7.64	2	0	0	0	0	0	0	0	0	LDA
81	31	female	9.8	1	0	0.1	0.125	0	0.1	0.125	0.025	0.160078	EVN
54	18	female	5.04	0.25	0.125	0	0.125	0	0.125	0.125	0.25	0.176777	LAR
43	2	female	1.82	0	0	0	0	0	0	0	0	0	LDA
84	8	female	2.6	0.38	0	0	0.125	0	0	0.125	0.125	0.125	EVN
63	23	female	5.19	0.38	0.25	0	0	0	0.25	0	0.25	0.25	LAR
59	13	female	9.31	1.25	0	0.1	0.125	0	0.1	0.125	0.025	0.160078	EVN
66	26	female	12.63	1.38	0.25	0	0.125	0	0.25	0.125	0.375	0.279508	LAR
85	35	female	4.82	1.75	0	0	0.166667	0	0	0.166667	0.166667	0.166667	EVN
71	25	male	4.9	0.63	0.125	0	0	0	0.125	0	0.125	0.125	EVN
76	32	female	7.62	2.25	0.125	0	0	0	0.125	0	0.125	0.125	EVN
74	14	male	11.23	2.38	0	0.15	0	0.2	0.15	0.2	-0.35	0.25	SML
73	26	male	1.6	0.13	0	0	0	0	0	0	0	0	LDA
69	17	male	2.45	0	0	0	0	0	0	0	0	0	LDA
42	24	female	7.6	0.25	0.125	0	0	0	0.125	0	0.125	0.125	EVN
64	25	female	1.05	0	0	0	0	0	0	0	0	0	LDA
71	25	female	19.8	2.75	0.375	0	0.125	0	0.375	0.125	0.5	0.395285	LAR
74	5	female	10.13	0.13	0	0.2	0	0	0.2	0	-0.2	0.2	SML
78	29	female	3.06	0.75	0	0	0	0	0	0	0	0	LDA
69	12	female	3.44	0.63	0	0	0	0.2	0	0.2	-0.2	0.2	SML
66	25	female	7.7	0	0	0	0	0	0	0	0	0	LDA
81	38	female	7.71	2.13	0	0	0	0	0	0	0	0	LDA
81	7	female	2.25	0.38	0	0	0	0	0	0	0	0	LDA
73	4	female	3.35	0	0	0	0	0	0	0	0	0	LDA
86	18	male	0.78	0	0	0	0	0	0	0	0	0	LDA
83	25	female	7.06	0.88	0.125	0	0	0	0.125	0	0.125	0.125	EVN
72	24	female	2.07	0	0	0	0	0	0	0	0	0	LDA
67	24	female	6.25	0.88	0.25	0	0	0	0.25	0	0.25	0.25	LAR
70	24	male	12.72	2.25	0.25	0	0.25	0	0.25	0.25	0.5	0.353553	LAR
41	4	female	2.67	0.13	0	0	0.291667	0	0	0.291667	0.291667	0.291667	LAR
70	40	female	2.45	1.25	0	0	0	0	0	0	0	0	LDA
79	13	female	1.17	3	0	0	0	0	0	0	0	0	LDA
80	17	male	8.16	0.75	0	0	0	0	0	0	0	0	LDA
60	41	female	5.16	0.75	0	0	0	0.8	0	0.8	-0.8	0.8	SML
75	32	female	5.54	0	0	0	0.125	0	0	0.125	0.125	0.125	EVN
73	39	female	4.18	0.88	0	0	0	0	0	0	0	0	LDA
59	29	female	3.71	0	0.25	0	0	0	0.25	0	0.25	0.25	LAR
71	21	female	2.98	0.63	0	0	0	0	0	0	0	0	LDA
61	32	female	9.3	1.75	0	0.05	0	0	0.05	0	-0.05	0.05	LDA
54	11	female	0.93	0.75	0	0	0	0	0	0	0	0	LDA
80	25	female	5.37	1.75	0	0	0	0	0	0	0	0	LDA
85	29	female	3.57	2	0	0	0	0	0	0	0	0	LDA
75	42	female	15.5	1	0.5	0.05	0	0.6	0.55	0.6	-0.15	0.813941	EVN
60	10	female	0.03	0	0	0	0	0	0	0	0	0	LDA
71	7	female	0.17	0	0	0	0	0	0	0	0	0	LDA
65	1	female	18.65	0.63	0.25	0.55	0	0	0.8	0	-0.3	0.8	SML
79	43	female	8.32	1.88	0	0	0.125	0	0	0.125	0.125	0.125	EVN
86	46	female	12.45	2.88	0.5	0	0	0	0.5	0	0.5	0.5	LAR
37	24	female	2.24	0.25	0	0	0	0	0	0	0	0	LDA
66	15	female	1.45	0.25	0	0	0	0	0	0	0	0	LDA
75	50	female	9.17	2.38	0	0	0	0	0	0	0	0	LDA
67	50	female	13.56	3	0.5	0	0	0	0.5	0	0.5	0.5	LAR
47	26	female	22.05	0.38	1.25	0.1	1.08333	1.2	1.35	2.28333	1.03333	2.65257	LAR
73	25	female	2.24	1.25	0	0	0	0	0	0	0	0	LDA
67	28	female	9.08	2.63	0	0	0	0	0	0	0	0	LDA
89	23	female	2.11	1.88	0	0	0	0	0	0	0	0	LDA
76	14	female	3.31	1.38	0	0	0	0	0	0	0	0	LDA
66	23	female	5.63	1.38	0	0	0	0	0	0	0	0	LDA
70	1	female	2.65	0	0	0	0	0	0	0	0	0	LDA
82	31	female	6.35	1.63	0	0	0	0	0	0	0	0	LDA
65	24	female	8.5	0.38	0.375	0	0	0	0.375	0	0.375	0.375	LAR
58	36	female	1.99	1.5	0	0	0	0	0	0	0	0	LDA
67	25	female	10.44	3	0	0	0	0	0	0	0	0	LDA
56	23	male	7.81	0.75	0	0	0	0	0	0	0	0	LDA
75	6	female	20.66	2.5	0.625	0.1	0.5	0.1	0.725	0.6	0.925	0.941077	LAR
55	3	female	5.82	0	0	0.1	0	0	0.1	0	-0.1	0.1	EVN
41	37	female	0.84	0.75	0	0	0	0	0	0	0	0	LDA
76	22	female	5	0.13	0	0	0.291667	0	0	0.291667	0.291667	0.291667	LAR
75	20	female	10.85	0	0	0.4	0	0	0.4	0	-0.4	0.4	SML
62	1	female	0.7	0	0	0	0	0	0	0	0	0	LDA
68	29	female	5.95	0.25	0.125	0	0	0	0.125	0	0.125	0.125	EVN
79	23	female	12.32	2.38	0.5	0	0	0	0.5	0	0.5	0.5	LAR
64	23	female	4.07	0	0	0	0	0	0	0	0	0	LDA
77	31	female	8.35	1	0	0.05	0.25	0	0.05	0.25	0.2	0.254951	EVN
64	49	female	2.34	0.63	0	0	0	0	0	0	0	0	LDA
58	5	female	2.77	0.13	0	0	0	0	0	0	0	0	LDA
63	26	female	14.2	0.75	0.125	0.3	0	0	0.425	0	-0.175	0.425	EVN
60	4	female	4.28	0.38	0.125	0	0	0	0.125	0	0.125	0.125	EVN
60	7	female	3.82	0	0.25	0	0	0	0.25	0	0.25	0.25	LAR
86	22	female	1.55	0.75	0	0	0	0	0	0	0	0	LDA
46	23	female	9.89	1.75	0.25	0.1	0	0	0.35	0	0.15	0.35	EVN
68	23	female	2.23	1	0	0	0	0	0	0	0	0	LDA
70	28	female	8.5	1	0.25	0.1	0	0	0.35	0	0.15	0.35	EVN
74	23	female	11.6	0.13	0.125	0.15	0	0	0.275	0	-0.025	0.275	EVN
71	26	male	1.55	0	0	0	0	0	0	0	0	0	LDA
71	23	female	1.87	0.13	0.125	0	0	0	0.125	0	0.125	0.125	EVN
70	22	female	2.46	0.88	0	0	0	0	0	0	0	0	LDA
67	3	female	6.77	0.5	0.125	0.05	0.125	0	0.175	0.125	0.2	0.215058	EVN
74	25	female	2.05	0	0	0	0	0	0	0	0	0	LDA
79	33	female	0.84	0	0	0	0	0	0	0	0	0	LDA
75	22	female	1.86	0.13	0	0	0	0	0	0	0	0	LDA
68	44	female	26.12	1.25	0.5	0.3	0.291667	0	0.8	0.291667	0.491667	0.85151	LAR
75	23	female	15.55	1.13	0.5	0.1	0.583333	0	0.6	0.583333	0.983333	0.836826	LAR
73	3	male	6.93	0	0.25	0	0	0	0.25	0	0.25	0.25	LAR
75	24	female	0.7	1.25	0	0	0	0	0	0	0	0	LDA
60	25	female	12.84	1.63	0.125	0	0	0	0.125	0	0.125	0.125	EVN
75	24	female	1.35	0	0	0	0	0	0	0	0	0	LDA
61	33	female	7.52	1.25	0.125	0	0.583333	0	0.125	0.583333	0.708333	0.596576	LAR
63	22	female	5.39	0.75	0	0	0	0	0	0	0	0	LDA
84	31	female	6.94	2.75	0	0	0	0	0	0	0	0	LDA
76	15	female	0.23	0	0	0	0	0	0	0	0	0	LDA
79	28	female	5.38	2.25	0	0	0	0	0	0	0	0	LDA
76	26	female	5.61	0.5	0.125	0	0	0	0.125	0	0.125	0.125	EVN
74	28	female	6.53	0.88	0.25	0	0	0	0.25	0	0.25	0.25	LAR
84	21	female	2.97	1.5	0	0	0	0	0	0	0	0	LDA
74	25	female	3.02	1.25	0	0	0	0	0	0	0	0	LDA
80	22	female	2.71	2.75	0	0	0	0	0	0	0	0	LDA
75	23	female	4.93	2.25	0	0	0	0	0	0	0	0	LDA
83	10	female	4.21	0.13	0	0	0	0	0	0	0	0	LDA
67	22	male	2.63	0.5	0	0	0	0	0	0	0	0	LDA
75	21	female	21.69	1.25	0.25	0.3	0	0	0.55	0	-0.05	0.55	EVN
75	21	female	5.04	0	0.25	0	0	0	0.25	0	0.25	0.25	LAR
52	5	female	5.42	0.25	0	0.15	0	0	0.15	0	-0.15	0.15	EVN
54	27	female	5.15	0	0	0	0	0	0	0	0	0	LDA
48	12	male	1.81	0	0	0	0	0	0	0	0	0	LDA
74	30	female	6.35	2.88	0	0	0	0	0	0	0	0	LDA
64	3	female	13.35	0	0.125	0.4	0	0	0.525	0	-0.275	0.525	SML
58	3	female	3.6	0.5	0	0	0	0	0	0	0	0	LDA
64	23	female	12.41	0	0.5	0.15	0	0	0.65	0	0.35	0.65	LAR
72	17	female	1.66	0.38	0	0	0	0	0	0	0	0	LDA
70	46	female	4.8	2.75	0.125	0	0	0	0.125	0	0.125	0.125	EVN
56	16	female	7.87	1	0.125	0	0.291667	0	0.125	0.291667	0.416667	0.317324	LAR
74	51	female	5.78	1.5	0	0	0	0	0	0	0	0	LDA
52	6	female	2.67	0	0	0	0	0	0	0	0	0	LDA
77	11	female	22.32	3	1	0	1.16667	0	1	1.16667	2.16667	1.53659	LAR
69	4	female	13.53	0.63	0	0	0	0	0	0	0	0	LDA
73	21	male	1.53	0	0	0	0	0	0	0	0	0	LDA
70	24	male	10.86	2.5	0	0.05	0	0.8	0.05	0.8	-0.85	0.801561	SML
76	21	female	5.93	0.5	0	0	0	0	0	0	0	0	LDA
48	22	female	0.8	0.25	0	0	0	0	0	0	0	0	LDA
59	28	female	5.39	1.13	0	0	0	0	0	0	0	0	LDA
53	11	female	2.43	0	0	0.05	0	0	0.05	0	-0.05	0.05	LDA
81	33	female	2.39	3	0	0	0	0	0	0	0	0	LDA
70	21	female	32.74	1.38	0.5	0.7	0.583333	0	1.2	0.583333	0.383333	1.33427	LAR
61	21	female	11.59	2.13	0	0	0.125	0	0	0.125	0.125	0.125	EVN
68	14	female	25.98	0.25	0.375	0.8	0	0	1.175	0	-0.425	1.175	SML
84	26	female	15.15	0	0	0.4	0	0	0.4	0	-0.4	0.4	SML
70	13	female	0.87	0	0	0	0	0	0	0	0	0	LDA
65	55	female	2.85	0.25	0	0	0	0.1	0	0.1	-0.1	0.1	EVN
59	21	female	10.43	0.75	0.125	0.1	0.25	0	0.225	0.25	0.275	0.336341	LAR
67	17	female	1.3	0.13	0	0	0	0	0	0	0	0	LDA
72	15	female	33.82	3	0.75	0.4	0.25	1	1.15	1.25	-0.4	1.69853	SML
69	20	female	20.36	1.25	0.375	0.2	0	0	0.575	0	0.175	0.575	EVN
70	40	female	0.45	0.5	0	0	0	0	0	0	0	0	LDA
48	16	female	4.17	0.25	0	0	0	0	0	0	0	0	LDA
53	21	female	9.36	0.38	0	0	0	0	0	0	0	0	LDA
83	34	female	1.04	0.25	0	0	0	0	0	0	0	0	LDA
39	20	male	8.67	0.13	0.25	0	0	0	0.25	0	0.25	0.25	LAR
69	22	female	4.98	0.88	0	0.05	0	0	0.05	0	-0.05	0.05	LDA
73	20	female	21.84	1.5	0	0	0	0	0	0	0	0	LDA
70	13	female	4.78	0.38	0	0	0	0	0	0	0	0	LDA
78	20	female	9.65	0.38	0.375	0.15	0	0	0.525	0	0.225	0.525	LAR
82	20	female	1.08	0.88	0	0	0	0	0	0	0	0	LDA
79	29	female	5.41	0.63	0	0	0	0	0	0	0	0	LDA
64	43	female	2.48	0	0	0	0	0	0	0	0	0	LDA
76	22	male	1.79	0	0	0	0	0	0	0	0	0	LDA
58	21	female	16.54	0.13	0.25	0.2	0.125	0	0.45	0.125	0.175	0.467039	EVN
72	22	female	3.77	0.25	0	0.05	0	0	0.05	0	-0.05	0.05	LDA
76	33	female	13.62	2.5	0.25	0	0	0	0.25	0	0.25	0.25	LAR
64	20	female	4.06	0.13	0	0	0.125	0	0	0.125	0.125	0.125	EVN
79	21	female	3.78	0.75	0	0	0	0	0	0	0	0	LDA
65	19	female	2.81	0	0	0	0	0	0	0	0	0	LDA
75	16	female	6.41	0	0	0	0.125	0	0	0.125	0.125	0.125	EVN
49	20	female	0.91	0	0	0	0	0	0	0	0	0	LDA
65	33	female	9.47	3	0	0	0	0	0	0	0	0	LDA
53	33	female	4.16	0	0	0	0	0	0	0	0	0	LDA
44	22	female	0.15	0	0	0	0	0	0	0	0	0	LDA
74	2	male	15.01	0.13	0.375	0	0	0	0.375	0	0.375	0.375	LAR
77	19	female	4.67	0.63	0.125	0	0	0	0.125	0	0.125	0.125	EVN
80	9	female	14.27	1.63	0.5	0	0.125	0	0.5	0.125	0.625	0.515388	LAR
82	9	female	4.13	0	0	0	0.291667	0	0	0.291667	0.291667	0.291667	LAR
47	22	female	2.18	2	0	0	0	0	0	0	0	0	LDA
74	23	female	15.02	1.38	0.125	0.05	0.25	0	0.175	0.25	0.325	0.305164	LAR
70	20	female	1.73	0.63	0	0	0	0	0	0	0	0	LDA
89	24	female	9.76	0.5	0.25	0	0	0.4	0.25	0.4	-0.15	0.471699	EVN
59	35	female	7.11	3	0	0	0	0	0	0	0	0	LDA
75	43	female	3.9	3	0	0	0.291667	0	0	0.291667	0.291667	0.291667	LAR
49	28	female	16.82	1	0.375	0.25	0.166667	0	0.625	0.166667	0.291667	0.646841	LAR
44	2	female	2.74	0.25	0.125	0	0	0.1	0.125	0.1	0.025	0.160078	EVN
47	5	female	17.4	0.38	0	0.4	0	0	0.4	0	-0.4	0.4	SML
80	24	male	3.24	0.38	0	0	0	0	0	0	0	0	LDA
72	19	male	2.08	0	0	0	0	0	0	0	0	0	LDA
76	36	female	18.23	0.13	0.375	0.3	0	0	0.675	0	0.075	0.675	EVN
65	5	female	3.88	0.88	0	0	0.125	0	0	0.125	0.125	0.125	EVN
73	40	female	3.38	0.88	0	0	0	0	0	0	0	0	LDA
71	19	female	12.63	2.75	0.25	0	0.125	0	0.25	0.125	0.375	0.279508	LAR
43	7	female	7.74	0	0	0.2	0	0	0.2	0	-0.2	0.2	SML
71	9	female	2.53	0.25	0	0	0	0	0	0	0	0	LDA
71	33	female	15.12	1.25	0.75	0.05	0.5	0.2	0.8	0.7	1	1.06301	LAR
58	31	female	3.88	3	0	0	0	0	0	0	0	0	LDA
64	24	female	4.44	0.88	0	0	0	0	0	0	0	0	LDA
68	20	female	0.06	0	0	0	0	0	0	0	0	0	LDA
67	36	female	5.43	1	0.25	0	0	0	0.25	0	0.25	0.25	LAR
58	19	male	5.04	0.5	0	0	0	0	0	0	0	0	LDA
71	15	female	13.77	0.63	0.25	0	0.125	0	0.25	0.125	0.375	0.279508	LAR
71	19	female	9.57	3	0.25	0	0	0	0.25	0	0.25	0.25	LAR
75	19	female	2.73	0.13	0.125	0	0	0	0.125	0	0.125	0.125	EVN
62	20	male	8.45	0	0	0.15	0	0	0.15	0	-0.15	0.15	EVN
70	22	female	2.38	0.75	0	0	0	0	0	0	0	0	LDA
74	34	female	16.17	1.13	0.375	0.3	0	0.6	0.675	0.6	-0.525	0.90312	SML
74	19	female	7.99	0.75	0	0.1	0.125	0	0.1	0.125	0.025	0.160078	EVN
54	19	female	0.4	0	0	0	0	0	0	0	0	0	LDA
96	26	female	7.36	2.63	0	0	0	0	0	0	0	0	LDA
74	19	female	6.39	0	0.25	0.05	0	0	0.3	0	0.2	0.3	EVN
61	11	female	1.91	0	0.125	0	0	0	0.125	0	0.125	0.125	EVN
70	19	female	3.35	0.75	0	0	0	0	0	0	0	0	LDA
75	18	male	1.9	0	0	0	0	0	0	0	0	0	LDA
54	19	female	0.06	0.38	0	0	0	0	0	0	0	0	LDA
73	19	female	6.75	0	0	0	0.25	0	0	0.25	0.25	0.25	LAR
80	2	female	10.4	2.63	0.25	0	0	0	0.25	0	0.25	0.25	LAR
56	18	female	1.91	0.88	0	0	0	0	0	0	0	0	LDA
61	20	female	0.99	0	0	0	0	0	0	0	0	0	LDA
75	19	male	17.79	2	0.75	0.1	0	0	0.85	0	0.65	0.85	LAR
74	14	female	5.23	0.63	0.125	0	0	0	0.125	0	0.125	0.125	EVN
55	2	female	0.86	0.13	0	0	0	0	0	0	0	0	LDA
73	23	female	2.1	0.38	0	0	0	0	0	0	0	0	LDA
39	18	female	6.02	0.75	0.125	0	0.291667	0	0.125	0.291667	0.416667	0.317324	LAR
56	26	female	4.05	0	0	0.1	0	0	0.1	0	-0.1	0.1	EVN
66	20	female	2.53	0.38	0	0	0	0	0	0	0	0	LDA
68	13	female	3.82	1	0	0	0	0	0	0	0	0	LDA
71	2	female	22.79	0.38	0.5	0.4	0.375	0.1	0.9	0.475	0.375	1.01766	LAR
76	0	male	10.8	0.88	0.25	0	0	0	0.25	0	0.25	0.25	LAR
75	17	female	9.86	1.5	0.25	0	0	0	0.25	0	0.25	0.25	LAR
71	21	female	6.46	2.25	0.25	0	0.125	0	0.25	0.125	0.375	0.279508	LAR
66	30	male	7.63	0.88	0.125	0	0	0	0.125	0	0.125	0.125	EVN
59	5	female	5.02	0	0.5	0	0	0	0.5	0	0.5	0.5	LAR
64	1	female	7.28	0.5	0	0.05	0	0	0.05	0	-0.05	0.05	LDA
65	18	female	4.72	1.38	0.125	0	0	0	0.125	0	0.125	0.125	EVN
74	21	female	5.2	1.75	0	0	0	0	0	0	0	0	LDA
72	25	female	9.2	0.88	0.125	0	0.125	0	0.125	0.125	0.25	0.176777	LAR
79	19	female	1.73	0	0	0	0	0	0	0	0	0	LDA
77	47	female	5.49	1	0.125	0	0	0	0.125	0	0.125	0.125	EVN
79	18	female	3.54	0.13	0.125	0	0	0	0.125	0	0.125	0.125	EVN
70	18	female	0.06	0	0	0	0	0	0	0	0	0	LDA
62	20	female	1.93	0.13	0	0	0	0	0	0	0	0	LDA
69	18	female	0.86	0	0	0	0	0	0	0	0	0	LDA
67	18	female	3.7	0	0	0	0	0	0	0	0	0	LDA
55	18	female	0.14	0	0	0	0	0	0	0	0	0	LDA
66	18	female	8.96	0.63	0.375	0	0	0	0.375	0	0.375	0.375	LAR
72	18	female	3.52	0.25	0	0	0	0	0	0	0	0	LDA
74	35	female	2.94	0.5	0	0	0	0	0	0	0	0	LDA
69	18	female	8.09	0.13	0	0	0.125	0	0	0.125	0.125	0.125	EVN
61	34	female	1.62	0	0	0	0	0	0	0	0	0	LDA
75	20	male	8.97	0.13	0	0	0.125	0	0	0.125	0.125	0.125	EVN
60	32	female	25.58	0.75	0.5	0.4	0.25	0	0.9	0.25	0.35	0.934077	LAR
81	36	female	14.57	0	0	0	0.291667	0	0	0.291667	0.291667	0.291667	LAR
69	34	female	6.91	1.25	0	0	0	0	0	0	0	0	LDA
81	19	female	6.83	0.63	0	0	0	0	0	0	0	0	LDA
76	18	female	10.32	0.63	0	0.15	0	0	0.15	0	-0.15	0.15	EVN
78	17	female	0.42	0.63	0	0	0	0	0	0	0	0	LDA
79	24	female	7.09	2.5	0	0	0	0	0	0	0	0	LDA
69	21	female	3.64	0.38	0.125	0	0	0	0.125	0	0.125	0.125	EVN
67	1	male	12.7	0.5	0	0.25	0	0	0.25	0	-0.25	0.25	SML
75	17	male	0.46	0	0	0	0	0	0	0	0	0	LDA
72	18	female	11.06	0.88	0.25	0.1	0.125	0	0.35	0.125	0.275	0.371652	LAR
76	22	female	6.5	1	0	0	0	0	0	0	0	0	LDA
67	42	female	2.68	0.88	0	0	0	0	0	0	0	0	LDA
81	18	female	15.46	2.75	0.5	0	0	0	0.5	0	0.5	0.5	LAR
67	19	female	19.25	0.5	0.125	0.2	0.125	0	0.325	0.125	0.05	0.34821	EVN
72	24	female	14.02	0.75	0.125	0.3	0	0	0.425	0	-0.175	0.425	EVN
66	10	female	10.72	2.38	0	0.05	0.5	1	0.05	1.5	-0.55	1.50083	SML
65	6	male	5.93	0	0	0	0	0	0	0	0	0	LDA
41	17	female	6.94	0.38	0.125	0.15	0	0	0.275	0	-0.025	0.275	EVN
73	11	female	2.55	0.5	0	0	0	0	0	0	0	0	LDA
62	0	male	6.25	0.63	0	0	0	0	0	0	0	0	LDA
63	14	female	1.34	0	0	0	0	0	0	0	0	0	LDA
43	8	female	5.05	0	0.125	0	0.125	0	0.125	0.125	0.25	0.176777	LAR
75	19	female	4.41	0	0	0	0.125	0	0	0.125	0.125	0.125	EVN
87	18	female	9.27	2.5	0	0	0	0	0	0	0	0	LDA
74	34	female	7.72	1.5	0	0	0	0	0	0	0	0	LDA
60	13	male	3.59	0	0	0	0	0	0	0	0	0	LDA
62	18	male	2.6	0.63	0	0	0	0	0	0	0	0	LDA
64	31	female	5.5	1.5	0	0	0.25	0	0	0.25	0.25	0.25	LAR
63	17	female	0.87	0	0	0	0	0	0	0	0	0	LDA
70	25	female	13.21	1.75	0.75	0	0	0	0.75	0	0.75	0.75	LAR
64	18	female	5.06	0.13	0	0.1	0	0	0.1	0	-0.1	0.1	EVN
54	13	female	3.56	0	0	0	0.25	0	0	0.25	0.25	0.25	LAR
82	20	female	6.36	1.75	0.125	0	0	0	0.125	0	0.125	0.125	EVN
66	17	female	8.24	0.38	0	0.15	0	0	0.15	0	-0.15	0.15	EVN
72	42	female	12.91	1.75	0.375	0.2	0.25	0.2	0.575	0.45	0.225	0.730154	LAR
73	23	female	5.39	1.88	0	0	0	0	0	0	0	0	LDA
74	17	female	2.35	0	0	0	0	0	0	0	0	0	LDA
53	17	male	1.05	0	0	0	0	0	0	0	0	0	LDA
86	24	female	20.15	2.63	0	0.8	0	0	0.8	0	-0.8	0.8	SML
83	15	female	3.63	2.13	0	0	0	0	0	0	0	0	LDA
69	18	female	7.58	0.63	0	0	0	0	0	0	0	0	LDA
75	17	female	2.47	1.13	0	0	0	0	0	0	0	0	LDA
66	17	female	4.99	0	0	0	0	0	0	0	0	0	LDA
68	18	male	3.02	0	0	0	0	0	0	0	0	0	LDA
67	17	female	6.53	1.13	0.125	0.15	0	0	0.275	0	-0.025	0.275	EVN
85	17	female	1.45	0.25	0	0	0	0	0	0	0	0	LDA
72	23	female	2.41	0.5	0	0	0.166667	0	0	0.166667	0.166667	0.166667	EVN
52	19	female	4.86	0.75	0	0	0	0	0	0	0	0	LDA
66	18	female	6.34	0.75	0.25	0	0.125	0	0.25	0.125	0.375	0.279508	LAR
74	17	female	8.21	1.5	0	0	0	0	0	0	0	0	LDA
63	17	female	2.59	0	0	0	0	0	0	0	0	0	LDA
81	23	female	2.52	0	0	0	0	0	0	0	0	0	LDA
45	7	female	3.21	0.13	0	0	0	0	0	0	0	0	LDA
72	18	female	0.66	0	0	0	0	0	0	0	0	0	LDA
74	17	female	0.16	0	0	0	0	0	0	0	0	0	LDA
75	25	female	7.68	1.38	0	0.2	0	0	0.2	0	-0.2	0.2	SML
70	21	female	15.17	2.63	0.5	0	0	0	0.5	0	0.5	0.5	LAR
64	45	female	3.56	1.38	0	0	0	0	0	0	0	0	LDA
72	17	female	2.13	0.88	0	0	0	0	0	0	0	0	LDA
49	21	female	3.28	0.63	0	0	0	0	0	0	0	0	LDA
57	17	female	3.62	1	0	0	0	0	0	0	0	0	LDA
63	36	female	7.38	0.5	0	0	0	0	0	0	0	0	LDA
78	16	male	7.2	0.25	0.25	0	0	0	0.25	0	0.25	0.25	LAR
67	17	female	1.32	0	0	0	0	0	0	0	0	0	LDA
78	17	female	5.75	0	0.125	0	0	0	0.125	0	0.125	0.125	EVN
51	30	female	5.96	0.5	0.25	0	0	0	0.25	0	0.25	0.25	LAR
55	17	male	7.65	1.63	0.25	0	0	0	0.25	0	0.25	0.25	LAR
86	43	male	6.05	1	0	0	0	0	0	0	0	0	LDA
66	18	female	10.55	0.88	0	0.4	0.125	0	0.4	0.125	-0.275	0.419076	SML
77	28	female	9.41	0.75	0	0	0	0	0	0	0	0	LDA
74	15	female	14.41	1.25	0.5	0.05	0	0	0.55	0	0.45	0.55	LAR
66	25	female	17.7	0.38	0	0.6	0	0	0.6	0	-0.6	0.6	SML
87	16	female	7.14	0.38	0	0.25	0	0.1	0.25	0.1	-0.35	0.269258	SML
66	18	female	13.39	1.13	0.75	0	0	1	0.75	1	-0.25	1.25	SML
70	35	female	3.51	0.75	0	0	0	0	0	0	0	0	LDA
69	8	male	2.05	0.5	0	0	0	0	0	0	0	0	LDA
68	15	male	28.4	0.75	0.5	0.15	0.125	0	0.65	0.125	0.475	0.66191	LAR
50	16	female	0.61	0	0	0	0	0	0	0	0	0	LDA
68	25	female	10.8	0.63	0.25	0.1	0	0	0.35	0	0.15	0.35	EVN
71	17	female	1.78	0	0	0	0	0	0	0	0	0	LDA
78	19	female	4.92	0	0.125	0	0.166667	0	0.125	0.166667	0.291667	0.208333	LAR
70	19	female	8.76	0.25	0.25	0.05	0	0	0.3	0	0.2	0.3	EVN
75	18	female	2.27	1	0	0	0	0	0	0	0	0	LDA
51	16	female	5.62	0.5	0.125	0.05	0	0	0.175	0	0.075	0.175	EVN
73	1	female	3.33	0.25	0.125	0	0	0	0.125	0	0.125	0.125	EVN
53	18	female	1.91	0	0	0	0	0	0	0	0	0	LDA
44	6	female	3.42	0	0.125	0	0	0	0.125	0	0.125	0.125	EVN
81	36	male	13.29	1.25	0.25	0.05	0	0.5	0.3	0.5	-0.3	0.583095	SML
85	22	female	10.22	3	0	0	0.125	0	0	0.125	0.125	0.125	EVN
51	16	female	2.2	0.38	0	0	0	0	0	0	0	0	LDA
69	17	female	0.57	0.5	0	0	0	0	0	0	0	0	LDA
49	31	female	1.53	1.38	0	0	0	0	0	0	0	0	LDA
44	7	male	1.15	0	0	0	0	0	0	0	0	0	LDA
70	43	female	0.83	0.13	0	0	0	0	0	0	0	0	LDA
66	17	female	7.83	0.63	0	0.2	0	0	0.2	0	-0.2	0.2	SML
70	17	female	7.74	0.25	0.25	0	0	0	0.25	0	0.25	0.25	LAR
62	26	female	10.55	2	0.25	0	1.16667	0	0.25	1.16667	1.41667	1.19315	LAR
68	20	female	11.54	1.25	0.375	0	0.375	0.1	0.375	0.475	0.65	0.605186	LAR
63	34	female	0.92	0	0	0	0	0	0	0	0	0	LDA
73	42	female	8.69	2.38	0	0	0	0	0	0	0	0	LDA
67	26	female	0.67	0.5	0	0	0	0	0	0	0	0	LDA
69	17	female	3.55	0.63	0	0	0	0	0	0	0	0	LDA
80	16	female	9.16	1.38	0.25	0	0.125	0	0.25	0.125	0.375	0.279508	LAR
68	16	male	16.12	0.88	0.25	0	0	0	0.25	0	0.25	0.25	LAR
70	7	female	13.08	3	0.25	0	0.125	0	0.25	0.125	0.375	0.279508	LAR
66	0	male	20.74	0	0.25	0.55	0	0.3	0.8	0.3	-0.6	0.8544	SML
61	16	female	6.16	0	0.5	0	0	0.2	0.5	0.2	0.3	0.538516	LAR
71	17	male	10	1	0.125	0.1	0.25	0	0.225	0.25	0.275	0.336341	LAR
79	16	female	1.14	0.25	0	0	0	0	0	0	0	0	LDA
74	20	female	3.39	0.13	0	0	0	0	0	0	0	0	LDA
73	16	male	0.17	0	0	0	0	0	0	0	0	0	LDA
53	8	female	8.86	1.38	0	0.15	0	0	0.15	0	-0.15	0.15	EVN
83	30	female	6.82	2.63	0	0	0	0	0	0	0	0	LDA
65	25	female	7.37	0.5	0	0.05	0	0	0.05	0	-0.05	0.05	LDA
51	15	female	2.91	0.25	0	0	0	0	0	0	0	0	LDA
67	26	female	6.19	0.63	0	0	0	0	0	0	0	0	LDA
79	25	female	1.26	0	0	0	0	0	0	0	0	0	LDA
72	26	female	7.96	0.38	0.125	0.1	0.166667	0	0.225	0.166667	0.191667	0.280005	EVN
70	19	male	30.83	0.88	0.75	0.7	0.25	0	1.45	0.25	0.3	1.47139	LAR
73	16	female	0.41	0	0	0	0	0	0	0	0	0	LDA
81	34	female	5.9	1.75	0.375	0	0.125	0	0.375	0.125	0.5	0.395285	LAR
71	17	male	1.36	0	0	0	0	0	0	0	0	0	LDA
57	15	female	6.39	0.25	0.125	0.05	0	0	0.175	0	0.075	0.175	EVN
76	31	female	14.24	2.5	0.25	0	0	0	0.25	0	0.25	0.25	LAR
73	15	female	1.13	0	0	0	0	0	0	0	0	0	LDA
88	15	male	4.51	0.5	0	0	0	0	0	0	0	0	LDA
73	1	male	4.45	0.38	0	0	0	0	0	0	0	0	LDA
80	23	male	1.24	0.25	0	0	0	0	0	0	0	0	LDA
78	16	female	3.03	1.38	0	0	0	0	0	0	0	0	LDA
75	33	female	7.84	2.75	0	0	0	0	0	0	0	0	LDA
69	17	female	1.57	0.38	0	0	0	0	0	0	0	0	LDA
79	15	female	10.63	1	0	0	0.125	0	0	0.125	0.125	0.125	EVN
65	15	female	1.42	0.38	0	0	0	0	0	0	0	0	LDA
62	18	female	2.02	0.13	0	0	0	0	0	0	0	0	LDA
67	15	female	12.25	0.75	0	0.3	0	0	0.3	0	-0.3	0.3	SML
40	15	female	6.79	0	0	0.2	0.166667	0.2	0.2	0.366667	-0.233333	0.417665	SML
71	19	female	6.76	1.63	0	0.05	0	0	0.05	0	-0.05	0.05	LDA
49	15	female	0.52	0.13	0	0	0	0	0	0	0	0	LDA
56	17	female	0.32	0	0	0	0	0	0	0	0	0	LDA
75	18	female	0.1	0	0	0	0	0	0	0	0	0	LDA
75	19	female	4.31	0.5	0	0	0	0	0	0	0	0	LDA
52	15	female	9.79	2.25	0.625	0	0	0	0.625	0	0.625	0.625	LAR
63	22	female	5.89	0.5	0	0.05	0	0	0.05	0	-0.05	0.05	LDA
64	42	female	10.56	1.38	0	0.2	0	0	0.2	0	-0.2	0.2	SML
81	16	female	14.46	2.5	0.375	0.15	0	0.3	0.525	0.3	-0.075	0.604669	EVN
58	19	male	5.11	0	0	0.05	0	0	0.05	0	-0.05	0.05	LDA
67	17	female	0.5	0	0	0	0	0	0	0	0	0	LDA
62	15	female	9.68	0.13	0.25	0	0	0	0.25	0	0.25	0.25	LAR
43	15	female	2.3	0	0	0	0.25	0	0	0.25	0.25	0.25	LAR
75	13	male	0.47	0	0	0	0	0	0	0	0	0	LDA
70	28	male	4.1	0.13	0.125	0	0	0	0.125	0	0.125	0.125	EVN
73	32	female	7.98	0.63	0	0	0	0	0	0	0	0	LDA
71	22	female	4.13	1.5	0	0	0	0	0	0	0	0	LDA
58	41	female	6.26	2.13	0.25	0	0.25	0	0.25	0.25	0.5	0.353553	LAR
86	15	female	4.97	2.75	0	0	0	0	0	0	0	0	LDA
77	18	female	10.62	2.25	0	0	0	0	0	0	0	0	LDA
79	33	female	8.7	2.63	0	0.05	0	0	0.05	0	-0.05	0.05	LDA
66	12	female	0.64	0	0	0	0	0	0	0	0	0	LDA
41	7	female	2.22	0.13	0	0	0	0	0	0	0	0	LDA
81	6	female	1.86	0.25	0.125	0	0	0	0.125	0	0.125	0.125	EVN
65	15	female	7.44	2.38	0	0	0	0	0	0	0	0	LDA
73	15	female	5.17	0	0	0	0	0	0	0	0	0	LDA
89	15	female	7.6	1.63	0	0	0	0	0	0	0	0	LDA
77	15	female	0.22	0.25	0	0	0	0	0	0	0	0	LDA
68	21	female	5.41	0.5	0.125	0	0	0	0.125	0	0.125	0.125	EVN
41	18	female	1.85	0	0	0.05	0	0	0.05	0	-0.05	0.05	LDA
65	27	female	5.72	2.25	0	0	0	0	0	0	0	0	LDA
62	14	male	6.6	2.63	0	0	0	0	0	0	0	0	LDA
80	9	female	1.45	0.25	0	0	0	0	0	0	0	0	LDA
86	15	male	4.07	0	0	0.05	0	0	0.05	0	-0.05	0.05	LDA
79	36	female	17.25	1.25	0	0.3	0	0	0.3	0	-0.3	0.3	SML
75	22	female	3.37	0	0	0	0	0	0	0	0	0	LDA
72	14	male	5.76	0	0.25	0	0	1	0.25	1	-0.75	1.03078	SML
54	29	female	13.01	0.88	0	0	0.125	0	0	0.125	0.125	0.125	EVN
65	5	male	8.7	0.38	0	0	0.125	0	0	0.125	0.125	0.125	EVN
69	20	female	1.91	0.88	0	0	0	0	0	0	0	0	LDA
70	20	female	7.22	1.5	0.25	0	0.166667	0	0.25	0.166667	0.416667	0.300463	LAR
70	14	female	1.78	0	0	0	0	0	0	0	0	0	LDA
48	16	male	2.04	0	0	0	0	0	0	0	0	0	LDA
66	14	female	0.34	0	0	0	0	0	0	0	0	0	LDA
63	14	female	3.42	0.63	0	0	0	0	0	0	0	0	LDA
59	14	female	5.74	0.25	0.125	0.1	0	0.1	0.225	0.1	-0.075	0.246221	EVN
67	16	female	2.09	0.75	0	0	0.291667	0	0	0.291667	0.291667	0.291667	LAR
71	15	female	4.65	0.25	0	0.15	0	0	0.15	0	-0.15	0.15	EVN
64	6	female	1.54	0	0	0	0	0	0	0	0	0	LDA
71	36	female	5	1.13	0	0	0	0	0	0	0	0	LDA
64	4	female	0.53	0	0	0	0	0	0	0	0	0	LDA
79	0	male	5.29	2.63	0	0.05	0	0	0.05	0	-0.05	0.05	LDA
74	15	male	1	0	0	0	0	0	0	0	0	0	LDA
69	6	female	3.62	0.25	0	0	0	0	0	0	0	0	LDA
46	15	female	23.67	0.25	0.25	0.6	0	0	0.85	0	-0.35	0.85	SML
66	14	female	4.84	0	0	0	0	0	0	0	0	0	LDA
66	13	female	2.87	0.63	0	0	0	0	0	0	0	0	LDA
68	8	female	5.09	0	0	0	0	0	0	0	0	0	LDA
76	25	female	7.25	1.5	0.375	0	0	0	0.375	0	0.375	0.375	LAR
83	19	male	12.37	1.13	0.375	0	0	0	0.375	0	0.375	0.375	LAR
73	47	female	10.15	0	0.375	0	0	0	0.375	0	0.375	0.375	LAR
70	26	female	7.51	0	0	0	0.125	0	0	0.125	0.125	0.125	EVN
70	17	female	0.79	0	0	0	0	0	0	0	0	0	LDA
35	14	female	3.8	1.5	0	0	0	0	0	0	0	0	LDA
73	32	female	1.94	0.88	0	0	0	0	0	0	0	0	LDA
69	17	female	3.94	0.75	0	0	0.125	0	0	0.125	0.125	0.125	EVN
77	8	female	13.85	0.5	0.25	0.05	0	0	0.3	0	0.2	0.3	EVN
52	16	female	8.6	0.88	0.25	0.1	0.25	0	0.35	0.25	0.4	0.430116	LAR
46	14	female	14.52	0	0.375	0	0.25	0	0.375	0.25	0.625	0.450694	LAR
74	13	female	6.79	0.25	0	0.1	0	0	0.1	0	-0.1	0.1	EVN
44	14	female	2.23	0	0	0	0	0	0	0	0	0	LDA
67	43	female	2.78	3	0	0	0	0	0	0	0	0	LDA
80	20	female	3.15	1.38	0	0	0.291667	0	0	0.291667	0.291667	0.291667	LAR
58	14	female	1.34	0	0	0	0	0	0	0	0	0	LDA
66	14	female	13.34	0.88	0.375	0.2	0	0	0.575	0	0.175	0.575	EVN
68	0	male	3.56	0	0	0	0	0	0	0	0	0	LDA
73	20	male	6.16	1	0.125	0	0.291667	0	0.125	0.291667	0.416667	0.317324	LAR
51	14	female	10.19	0.5	0.125	0	0	0	0.125	0	0.125	0.125	EVN
70	33	female	1.7	2.13	0	0	0	0	0	0	0	0	LDA
78	14	female	8.3	2.5	0.25	0	0	0	0.25	0	0.25	0.25	LAR
66	17	female	5.25	0.75	0.25	0	0	0	0.25	0	0.25	0.25	LAR
63	14	female	3.26	0.88	0	0	0	0	0	0	0	0	LDA
60	15	male	1.22	0	0	0	0	0	0	0	0	0	LDA
69	13	female	0.43	0	0	0	0	0	0	0	0	0	LDA
54	16	female	19.53	0.25	0.25	0.45	0	0	0.7	0	-0.2	0.7	EVN
68	35	female	4.12	2.13	0	0	0	0	0	0	0	0	LDA
71	30	female	6.96	1.13	0	0.2	0	0	0.2	0	-0.2	0.2	SML
65	16	female	21.44	0.63	0.375	0.4	0.5	0.4	0.775	0.9	0.075	1.1877	EVN
57	14	female	6.99	0.75	0.25	0	0.125	0	0.25	0.125	0.375	0.279508	LAR
67	13	female	17.4	0.5	0.25	0.25	0.166667	0.1	0.5	0.266667	0.0666667	0.566667	EVN
63	15	female	21.54	2.13	0.625	0.4	0.833333	0.8	1.025	1.63333	0.258333	1.92832	LAR
36	14	female	1.82	0	0	0	0	0	0	0	0	0	LDA
44	14	female	7.67	1	0.125	0.05	0	0	0.175	0	0.075	0.175	EVN
49	13	male	0.08	0	0	0	0	0	0	0	0	0	LDA
75	27	female	2.48	2.25	0	0	0	0	0	0	0	0	LDA
47	4	male	4.91	0	0	0	0	0	0	0	0	0	LDA
69	19	female	3.4	0.13	0.125	0	0	0	0.125	0	0.125	0.125	EVN
79	16	female	5.43	1.38	0	0	0	0	0	0	0	0	LDA
69	14	female	4.79	0.63	0	0.1	0	0	0.1	0	-0.1	0.1	EVN
71	13	female	1.12	0	0	0	0	0	0	0	0	0	LDA
69	36	female	6.28	0.5	0.125	0	0	0	0.125	0	0.125	0.125	EVN
53	14	female	0.87	0	0	0	0	0	0	0	0	0	LDA
75	14	female	5.73	0	0.125	0.1	0	0	0.225	0	0.025	0.225	EVN
68	57	male	3.11	0	0	0	0	0	0	0	0	0	LDA
77	14	female	4.62	1.75	0	0.15	0	0	0.15	0	-0.15	0.15	EVN
73	21	female	5.34	0.38	0	0	0	0	0	0	0	0	LDA
68	13	female	0.72	0.38	0	0	0	0	0	0	0	0	LDA
75	10	female	9.52	0	0.25	0	0	0	0.25	0	0.25	0.25	LAR
68	43	female	3.09	1	0	0	0	0	0	0	0	0	LDA
55	24	female	7.35	1.63	0.25	0	0	0	0.25	0	0.25	0.25	LAR
77	15	female	0.98	0.25	0	0	0	0	0	0	0	0	LDA
52	8	female	2.33	0.13	0	0	0	0	0	0	0	0	LDA
63	18	female	5.73	1.75	0.25	0	0.125	0	0.25	0.125	0.375	0.279508	LAR
87	15	female	7.27	2.25	0	0	0	0	0	0	0	0	LDA
54	15	female	28.93	0.5	0.75	0.4	0.125	0	1.15	0.125	0.475	1.15677	LAR
67	19	female	2.27	0	0	0	0	0	0	0	0	0	LDA
57	8	female	0.63	0	0	0	0	0	0	0	0	0	LDA
52	41	female	0.62	0.63	0	0	0	0	0	0	0	0	LDA
78	15	female	8.78	0.13	0.25	0.05	0	0	0.3	0	0.2	0.3	EVN
81	13	female	0.22	0	0	0	0	0	0	0	0	0	LDA
67	15	female	7.75	1.88	0.5	0	0	0	0.5	0	0.5	0.5	LAR
69	15	female	5.64	1	0.25	0	0	0	0.25	0	0.25	0.25	LAR
40	15	female	6.29	0.38	0.125	0.05	0	0	0.175	0	0.075	0.175	EVN
58	22	female	7.62	1	0	0	0	0	0	0	0	0	LDA
64	15	female	8.38	0.13	0	0.1	0.291667	0	0.1	0.291667	0.191667	0.308333	EVN
74	21	female	9.18	0.38	0	0.15	0	0	0.15	0	-0.15	0.15	EVN
76	13	female	4.67	0.25	0	0.05	0	0	0.05	0	-0.05	0.05	LDA
76	30	male	3.59	0	0	0	0	0	0	0	0	0	LDA
65	24	female	3.68	0.5	0.125	0	0	0	0.125	0	0.125	0.125	EVN
66	13	female	0.33	0	0	0	0	0	0	0	0	0	LDA
65	15	female	1.31	0.5	0	0	0	0	0	0	0	0	LDA
74	16	female	4.33	0.13	0	0	0	0	0	0	0	0	LDA
56	14	female	6.23	0.25	0.125	0	0.125	0	0.125	0.125	0.25	0.176777	LAR
63	14	female	3.33	0.5	0.125	0	0	0	0.125	0	0.125	0.125	EVN
82	13	female	11.22	2.75	0.375	0	0	0	0.375	0	0.375	0.375	LAR
55	20	female	19.14	0.38	0	0.5	0.583333	0	0.5	0.583333	0.0833333	0.768295	EVN
74	14	female	7.3	1.5	0	0	0	0	0	0	0	0	LDA
66	18	female	6.5	0.75	0	0.1	0	0	0.1	0	-0.1	0.1	EVN
60	13	female	0.6	0.25	0	0	0	0	0	0	0	0	LDA
75	13	female	1.89	0.25	0	0	0	0	0	0	0	0	LDA
67	15	female	0.32	0.13	0	0	0	0	0	0	0	0	LDA
62	13	female	0.84	0	0	0	0	0	0	0	0	0	LDA
67	13	female	1.98	0.88	0	0	0.291667	0	0	0.291667	0.291667	0.291667	LAR
49	4	female	6.66	0.25	0	0.1	0	0	0.1	0	-0.1	0.1	EVN
58	9	female	1.7	0	0	0	0	0	0	0	0	0	LDA
79	22	female	9.32	3	0	0	0	1	0	1	-1	1	SML
52	7	female	6.84	0.25	0	0.2	0	0	0.2	0	-0.2	0.2	SML
78	14	female	3.27	1	0	0	0.125	0	0	0.125	0.125	0.125	EVN
78	16	female	2.94	0.5	0	0	0	0	0	0	0	0	LDA
59	13	female	3.1	0	0.25	0	0	0	0.25	0	0.25	0.25	LAR
84	14	male	6.5	0.5	0.125	0.1	0	0	0.225	0	0.025	0.225	EVN
60	6	female	0.95	0	0	0	0	0	0	0	0	0	LDA
31	13	male	1.93	0	0	0	0	0	0	0	0	0	LDA
74	14	female	0.32	0	0	0	0	0	0	0	0	0	LDA
76	13	female	3.52	0.13	0	0	0.125	0	0	0.125	0.125	0.125	EVN
38	20	female	24.44	1.38	0.5	0.65	0.125	0	1.15	0.125	-0.025	1.15677	EVN
50	15	female	0.85	0	0	0	0	0	0	0	0	0	LDA
80	14	male	2.46	0	0	0	0	0	0	0	0	0	LDA
52	19	male	3.3	0	0.125	0	0	0	0.125	0	0.125	0.125	EVN
57	14	male	1.05	0	0	0	0	0	0	0	0	0	LDA
74	23	female	2.85	1.38	0	0	0	0	0	0	0	0	LDA
54	13	female	6.71	1.25	0.25	0	0.166667	0	0.25	0.166667	0.416667	0.300463	LAR
52	24	female	8.88	1	0	0.25	0	0	0.25	0	-0.25	0.25	SML
67	16	female	1.78	0	0	0	0	0	0	0	0	0	LDA
69	15	female	23.65	2	0.25	0.75	0	0	1	0	-0.5	1	SML
75	42	female	4.39	2.5	0	0	0	0	0	0	0	0	LDA
60	1	female	0.41	0	0	0	0	0	0	0	0	0	LDA
68	18	female	2.65	0.13	0	0	0	0	0	0	0	0	LDA
77	13	female	10.85	0.63	0.25	0	0	0	0.25	0	0.25	0.25	LAR
50	11	male	3.26	0.63	0	0	0	0	0	0	0	0	LDA
70	13	female	11.81	0.5	0.125	0.1	0.125	0	0.225	0.125	0.15	0.257391	EVN
76	22	female	8	2.13	0	0	0	0	0	0	0	0	LDA
68	28	female	1.15	0.13	0	0	0	0	0	0	0	0	LDA
40	14	female	1.03	0.13	0	0	0	0	0	0	0	0	LDA
71	13	female	1.13	0.75	0	0	0	0	0	0	0	0	LDA
69	30	female	21.12	1.88	0.125	0.5	0	0	0.625	0	-0.375	0.625	SML
76	10	male	1.24	0	0	0	0	0	0	0	0	0	LDA
69	13	female	0.37	0.38	0	0	0	0	0	0	0	0	LDA
68	13	male	0.44	0	0	0	0	0	0	0	0	0	LDA
36	13	female	8.45	0.88	0	0	0.25	0	0	0.25	0.25	0.25	LAR
65	1	female	0.99	0.38	0	0	0	0	0	0	0	0	LDA
62	19	male	0.54	0	0	0	0	0	0	0	0	0	LDA
73	34	male	14.46	2	0.625	0	0.125	0	0.625	0.125	0.75	0.637377	LAR
76	15	female	12.41	2.5	0.125	0.1	0	0.1	0.225	0.1	-0.075	0.246221	EVN
75	15	female	5.93	0	0	0	0	0	0	0	0	0	LDA
74	11	female	5.14	1.13	0	0	0	0	0	0	0	0	LDA
73	8	female	8.52	1.5	0	0	0	0	0	0	0	0	LDA
42	14	female	2.03	0.13	0	0	0	0	0	0	0	0	LDA
64	29	female	14.75	1.13	0.125	0.2	0	0	0.325	0	-0.075	0.325	EVN
69	24	female	4.78	1.13	0	0	0	0	0	0	0	0	LDA
71	12	female	7.37	0.5	0.125	0	0.25	0	0.125	0.25	0.375	0.279508	LAR
84	4	male	1.77	0.63	0	0	0	0	0	0	0	0	LDA
74	13	female	3.68	0.25	0	0	0	0	0	0	0	0	LDA
62	16	female	2.37	0.13	0.125	0	0	0	0.125	0	0.125	0.125	EVN
50	13	female	3.35	0.13	0.125	0	0	0	0.125	0	0.125	0.125	EVN
68	23	female	2.53	0	0	0	0	0	0	0	0	0	LDA
67	13	female	0.55	0.38	0	0	0	0	0	0	0	0	LDA
64	17	female	1.59	0	0	0	0	0	0	0	0	0	LDA
75	17	female	1.11	0	0	0	0	0	0	0	0	0	LDA
58	28	female	5.84	0.5	0	0.15	0	0.2	0.15	0.2	-0.35	0.25	SML
55	28	male	3.34	0.13	0	0	0	0	0	0	0	0	LDA
76	9	male	7.1	2.5	0.125	0	0	0	0.125	0	0.125	0.125	EVN
68	20	female	1.22	0.88	0	0	0	0	0	0	0	0	LDA
48	27	female	1.48	0.38	0	0	0	0	0	0	0	0	LDA
64	23	female	4.84	0.25	0	0	0	0	0	0	0	0	LDA
70	25	female	12.24	1.38	0.125	0.1	0.125	0	0.225	0.125	0.15	0.257391	EVN
77	19	female	1.1	0.25	0	0	0	0	0	0	0	0	LDA
69	13	female	13.76	1.13	0.25	0	0	0	0.25	0	0.25	0.25	LAR
79	21	female	8.07	0.25	0.125	0.05	0	0	0.175	0	0.075	0.175	EVN
58	12	female	2.92	0	0	0	0	0	0	0	0	0	LDA
74	12	female	7.74	1	0	0	0.291667	0	0	0.291667	0.291667	0.291667	LAR
75	14	female	34.96	0.5	1	0.8	0	0	1.8	0	0.2	1.8	EVN
72	12	female	0.05	0	0	0	0	0	0	0	0	0	LDA
77	13	male	2.02	0	0	0	0	0	0	0	0	0	LDA
63	2	female	0.52	0	0	0	0	0	0	0	0	0	LDA
82	12	female	22.33	1.5	0.25	0.5	0.5	0.4	0.75	0.9	-0.15	1.17154	EVN
70	30	female	5.38	2.5	0	0	0	0	0	0	0	0	LDA
32	14	female	9.13	0.25	0	0	0	0	0	0	0	0	LDA
53	27	female	2.32	0	0	0	0	0	0	0	0	0	LDA
69	14	female	20.68	2.25	0.375	0	0.583333	0	0.375	0.583333	0.958333	0.693472	LAR
76	12	female	1.57	0	0	0	0	0	0	0	0	0	LDA
68	12	female	3.01	0.38	0	0	0	0	0	0	0	0	LDA
75	34	female	0.66	0	0	0	0	0	0	0	0	0	LDA
60	12	female	3.29	0.38	0	0	0	0	0	0	0	0	LDA
61	7	female	2.02	0	0	0	0	0	0	0	0	0	LDA
66	1	female	5.64	0.13	0	0	0	0	0	0	0	0	LDA
60	40	female	5.14	2.75	0.25	0	0	0	0.25	0	0.25	0.25	LAR
86	12	female	5.07	0.88	0	0	0	0	0	0	0	0	LDA
53	12	female	2.98	0	0	0	0	0	0	0	0	0	LDA
77	3	female	3.81	0.63	0	0	0.333333	0	0	0.333333	0.333333	0.333333	LAR
50	12	female	3.16	0.63	0	0	0.25	0	0	0.25	0.25	0.25	LAR
72	18	male	7.03	0.5	0	0	0	0	0	0	0	0	LDA
52	12	female	3.69	0	0	0	0	0.2	0	0.2	-0.2	0.2	SML
67	31	female	2.14	1.25	0	0	0	0	0	0	0	0	LDA
69	13	female	1.42	0	0	0	0	0	0	0	0	0	LDA
98	12	female	0.32	1.5	0	0	0	0	0	0	0	0	LDA
74	13	female	1	0	0	0	0	0	0	0	0	0	LDA
58	14	female	4.14	0	0.125	0	0	0	0.125	0	0.125	0.125	EVN
73	38	female	2.97	0.25	0	0.05	0	0	0.05	0	-0.05	0.05	LDA
68	15	female	4.09	2.38	0	0	0	0	0	0	0	0	LDA
68	2	female	7.05	0.63	0.25	0	0	0	0.25	0	0.25	0.25	LAR
30	2	female	1.72	0	0	0	0	0	0	0	0	0	LDA
68	16	female	2.79	0.13	0.125	0	0	0	0.125	0	0.125	0.125	EVN
71	17	female	0.86	0.25	0	0	0	0	0	0	0	0	LDA
74	25	female	7.84	3	0.125	0	0	0	0.125	0	0.125	0.125	EVN
72	21	female	4.12	0	0	0	0.125	0	0	0.125	0.125	0.125	EVN
64	13	female	1.92	0.13	0	0	0	0	0	0	0	0	LDA
54	11	female	2.51	0	0	0	0	0	0	0	0	0	LDA
84	26	female	2.61	0.25	0	0	0	0	0	0	0	0	LDA
84	12	male	4	1.25	0	0	0	0	0	0	0	0	LDA
73	12	female	10.11	0.88	0	0	0.25	0	0	0.25	0.25	0.25	LAR
75	7	male	4.82	0.63	0	0	0	0	0	0	0	0	LDA
77	12	female	18.55	0.25	0.5	0.1	0	0	0.6	0	0.4	0.6	LAR
67	51	female	10.43	0.38	0	0.1	0	0	0.1	0	-0.1	0.1	EVN
86	12	female	2.38	0	0	0	0	0	0	0	0	0	LDA
66	27	male	1.52	0	0	0	0	0	0	0	0	0	LDA
64	0	female	3.81	0	0.25	0	0	0	0.25	0	0.25	0.25	LAR
72	11	male	7.75	0.38	0.25	0	0	0	0.25	0	0.25	0.25	LAR
52	12	male	7.75	1.13	0.375	0	0	0	0.375	0	0.375	0.375	LAR
51	4	female	2.81	0	0	0	0	0.5	0	0.5	-0.5	0.5	SML
52	3	female	4.95	0.13	0.125	0	0	0	0.125	0	0.125	0.125	EVN
80	17	female	12.1	2.88	0	0	0.25	0	0	0.25	0.25	0.25	LAR
69	12	male	1.73	0	0	0	0	0	0	0	0	0	LDA
72	12	female	9.99	0.75	0.25	0	0	0	0.25	0	0.25	0.25	LAR
66	15	female	4.32	2	0	0	0	0	0	0	0	0	LDA
70	12	female	2.45	0.13	0	0	0	0	0	0	0	0	LDA
43	17	female	6.82	0.25	0	0.1	0	0	0.1	0	-0.1	0.1	EVN
63	20	female	1.58	0.63	0.125	0	0	0	0.125	0	0.125	0.125	EVN
76	41	male	6.12	0.5	0	0	0.125	0	0	0.125	0.125	0.125	EVN
47	21	female	4.72	0.5	0	0	0	0	0	0	0	0	LDA
59	11	female	5.61	0	0	0	0	0	0	0	0	0	LDA
36	15	male	19.48	0.13	0.25	0	0.125	0	0.25	0.125	0.375	0.279508	LAR
67	12	female	10.34	0	0.125	0.2	0	0	0.325	0	-0.075	0.325	EVN
69	12	female	13.67	1.5	0	0	0.25	0	0	0.25	0.25	0.25	LAR
66	4	male	3.83	0	0	0.05	0	0	0.05	0	-0.05	0.05	LDA
72	19	female	17.43	1.38	0	0.4	0	0	0.4	0	-0.4	0.4	SML
75	12	female	0.95	0	0	0	0	0	0	0	0	0	LDA
77	25	female	4.12	2.25	0	0	0	0	0	0	0	0	LDA
64	16	female	4.66	0.25	0.25	0	0	0	0.25	0	0.25	0.25	LAR
57	14	female	0.53	0	0	0	0	0	0	0	0	0	LDA
69	12	female	4.57	0	0	0.1	0	0	0.1	0	-0.1	0.1	EVN
70	10	female	43.9	2.13	0.625	1.1	0	0	1.725	0	-0.475	1.725	SML
68	36	female	3.88	2.38	0	0	0	0	0	0	0	0	LDA
78	11	female	49.77	0.88	0.5	0.6	0.25	0	1.1	0.25	0.15	1.12805	EVN
41	26	female	6.7	0.63	0.125	0.15	0	0	0.275	0	-0.025	0.275	EVN
72	56	female	2.32	0	0	0	0	0	0	0	0	0	LDA
53	12	male	6.2	0.38	0	0	0	0.3	0	0.3	-0.3	0.3	SML
68	13	female	10.7	0.25	0.5	0.1	0.125	0	0.6	0.125	0.525	0.612883	LAR
70	11	female	6.26	0	0	0.2	0	0	0.2	0	-0.2	0.2	SML
66	11	female	9.18	0	0.5	0.05	0	0	0.55	0	0.45	0.55	LAR
72	11	male	2.15	0.13	0	0	0	0	0	0	0	0	LDA
81	11	female	0.79	0	0	0	0	0	0	0	0	0	LDA
63	21	female	6.64	1.63	0.5	0	0	0	0.5	0	0.5	0.5	LAR
52	11	female	3.93	0	0	0	0.125	0	0	0.125	0.125	0.125	EVN
66	16	female	5.12	0.75	0	0	0	0	0	0	0	0	LDA
61	7	male	12.67	0	0.125	0.3	0	0	0.425	0	-0.175	0.425	EVN
82	15	female	11.07	1.75	0.25	0.15	0	0	0.4	0	0.1	0.4	EVN
56	11	female	8.18	0	0.25	0	0	0	0.25	0	0.25	0.25	LAR
80	11	female	8.34	1.88	0.375	0	0	0	0.375	0	0.375	0.375	LAR
55	1	female	5.14	0	0.25	0	0	0	0.25	0	0.25	0.25	LAR
76	1	male	7.37	0	0	0.1	0	0	0.1	0	-0.1	0.1	EVN
68	17	female	0.69	0	0	0	0	0	0	0	0	0	LDA
75	11	male	9	0.5	0.125	0	0	0	0.125	0	0.125	0.125	EVN
71	12	female	2.48	0.13	0	0.05	0	0	0.05	0	-0.05	0.05	LDA
62	11	male	2.61	0	0	0	0	0	0	0	0	0	LDA
77	12	female	0.75	0.38	0	0	0	0	0	0	0	0	LDA
49	14	female	3.84	0	0	0	0	0	0	0	0	0	LDA
68	17	female	1.38	0.38	0	0	0	0	0	0	0	0	LDA
77	7	female	4.04	1.5	0	0	0	0	0	0	0	0	LDA
79	3	female	0.54	0	0	0	0	0	0	0	0	0	LDA
71	21	female	1.06	0.88	0	0	0	0	0	0	0	0	LDA
69	11	female	1.95	1	0	0	0	0	0	0	0	0	LDA
76	17	female	1.09	0.63	0	0	0	0	0	0	0	0	LDA
70	11	female	2.82	0	0	0	0	0	0	0	0	0	LDA
76	7	female	1.97	0.25	0.125	0	0	0	0.125	0	0.125	0.125	EVN
83	11	female	0.78	0	0	0	0	0	0	0	0	0	LDA
67	12	female	2.63	0.25	0	0	0	0	0	0	0	0	LDA
55	20	male	11.92	2.38	0.375	0.05	0	0	0.425	0	0.325	0.425	LAR
61	12	female	2.21	0	0	0	0	0	0	0	0	0	LDA
63	12	male	0.52	0	0	0	0	0	0	0	0	0	LDA
64	11	female	2.06	0	0	0	0.125	0	0	0.125	0.125	0.125	EVN
64	20	female	11.66	0.5	0	0.05	0.125	0	0.05	0.125	0.075	0.134629	EVN
56	11	female	16.99	1.63	0.5	0	0	0	0.5	0	0.5	0.5	LAR
69	11	female	0.33	0.25	0	0	0	0	0	0	0	0	LDA
72	4	female	2.08	0	0	0	0	0	0	0	0	0	LDA
63	11	male	0.47	0	0	0	0	0	0	0	0	0	LDA
69	23	male	1.59	0	0	0	0	0	0	0	0	0	LDA
66	13	female	9.59	0.75	0	0.15	0	0	0.15	0	-0.15	0.15	EVN
66	26	female	5	0	0	0	0	0	0	0	0	0	LDA
73	12	female	6.93	0.5	0	0.15	0	0	0.15	0	-0.15	0.15	EVN
41	11	male	5.27	0	0	0	0	0	0	0	0	0	LDA
35	14	female	2.34	0	0	0	0.125	0	0	0.125	0.125	0.125	EVN
48	11	female	0.46	0	0	0	0	0	0	0	0	0	LDA
89	10	female	14.42	3	0.5	0	0	0	0.5	0	0.5	0.5	LAR
79	10	female	2.6	0.63	0	0	0	0	0	0	0	0	LDA
69	14	female	2.42	0.25	0	0	0	0.1	0	0.1	-0.1	0.1	EVN
79	45	female	7.26	0.5	0.25	0	0	0	0.25	0	0.25	0.25	LAR
47	11	female	1.69	0	0	0	0	0	0	0	0	0	LDA
57	10	female	1.14	0	0	0	0	0	0	0	0	0	LDA
56	7	female	4.04	0	0	0.05	0	0	0.05	0	-0.05	0.05	LDA
68	11	female	6.63	0	0.25	0	0	0	0.25	0	0.25	0.25	LAR
76	31	female	3.13	1.38	0	0	0	0	0	0	0	0	LDA
45	10	female	4.66	0	0.25	0	0	0	0.25	0	0.25	0.25	LAR
34	11	female	5.08	0.38	0	0	0	0	0	0	0	0	LDA
42	11	female	1.02	0	0	0	0	0	0	0	0	0	LDA
54	10	female	4.97	0.63	0	0	0	0	0	0	0	0	LDA
69	13	female	6.28	0	0.25	0	0	0	0.25	0	0.25	0.25	LAR
75	23	female	3.74	1.75	0	0	0	0	0	0	0	0	LDA
82	12	female	3.22	0	0	0	0	0	0	0	0	0	LDA
66	11	female	2.65	0.13	0	0	0	0	0	0	0	0	LDA
55	3	male	12.43	1.13	0.125	0.2	0	0	0.325	0	-0.075	0.325	EVN
63	14	female	6.3	0	0.25	0.1	0.291667	0	0.35	0.291667	0.441667	0.455598	LAR
38	10	female	9.32	0	0.25	0	0	0	0.25	0	0.25	0.25	LAR
72	10	male	7.49	0	0	0	0.125	0	0	0.125	0.125	0.125	EVN
80	11	male	0.68	0	0	0	0	0	0	0	0	0	LDA
76	11	male	2.02	0	0	0	0	0	0	0	0	0	LDA
52	10	female	0.59	0.13	0	0	0	0	0	0	0	0	LDA
67	2	male	0.45	0	0	0	0	0	0	0	0	0	LDA
57	6	female	3.64	0.25	0.125	0	0	0	0.125	0	0.125	0.125	EVN
74	1	female	0.06	3	0	0	0	0	0	0	0	0	LDA
69	10	female	5.93	0.25	0.5	0	0	0	0.5	0	0.5	0.5	LAR
73	20	female	9.65	0.38	0.25	0.15	0	0	0.4	0	0.1	0.4	EVN
65	22	female	1.83	0	0	0	0.291667	0	0	0.291667	0.291667	0.291667	LAR
78	11	female	4.44	0	0.125	0	0	0.4	0.125	0.4	-0.275	0.419076	SML
74	10	female	9.13	2.75	0.25	0	0	0	0.25	0	0.25	0.25	LAR
79	11	male	7.94	2.5	0	0	0	0	0	0	0	0	LDA
63	10	female	0.5	0	0	0	0	0	0	0	0	0	LDA
77	10	female	1.53	0.38	0	0	0	0	0	0	0	0	LDA
73	10	female	2.75	0.88	0	0	0	0	0	0	0	0	LDA
58	10	male	1.61	0.25	0	0	0	0	0	0	0	0	LDA
66	18	female	6.94	0.5	0.25	0	0.125	0	0.25	0.125	0.375	0.279508	LAR
52	10	male	2.72	0	0	0	0	0	0	0	0	0	LDA
41	10	female	1.53	0	0	0	0	0	0	0	0	0	LDA
66	10	male	1.83	0.13	0	0	0	0	0	0	0	0	LDA
62	27	female	3	0.38	0	0	0	0	0	0	0	0	LDA
69	10	female	5.89	0.5	0	0.1	0.25	0.1	0.1	0.35	0.05	0.364005	EVN
74	10	female	0.55	0	0	0	0	0	0	0	0	0	LDA
30	12	female	3.54	0	0	0	0	0.1	0	0.1	-0.1	0.1	EVN
73	12	female	0.86	0	0	0	0	0	0	0	0	0	LDA
47	10	female	0.36	0.13	0	0	0	0	0	0	0	0	LDA
81	2	female	1.74	0.13	0	0	0	0	0	0	0	0	LDA
68	35	female	6.27	0.63	0	0.1	0	0	0.1	0	-0.1	0.1	EVN
81	38	female	0.52	0.63	0	0	0	0	0	0	0	0	LDA
66	2	female	8.23	0.5	0	0.2	0	0	0.2	0	-0.2	0.2	SML
69	3	male	0.32	0	0	0	0	0	0	0	0	0	LDA
74	1	female	9.2	0.5	0	0.15	0	0	0.15	0	-0.15	0.15	EVN
72	10	male	0.72	0	0	0	0	0	0	0	0	0	LDA
74	10	female	2.44	0	0	0	0	0	0	0	0	0	LDA
69	9	male	0.46	0	0	0	0	0	0	0	0	0	LDA
83	10	female	13.78	1.75	0.375	0	0	0	0.375	0	0.375	0.375	LAR
77	12	male	2.56	0.5	0	0	0	0	0	0	0	0	LDA
49	10	female	5.32	0	0.125	0	0.125	0	0.125	0.125	0.25	0.176777	LAR
65	35	female	5.42	1.13	0	0	0.333333	0	0	0.333333	0.333333	0.333333	LAR
70	9	female	1.52	0	0	0	0	0	0	0	0	0	LDA
85	46	female	3.94	0.88	0	0	0.166667	0	0	0.166667	0.166667	0.166667	EVN
77	11	male	3.08	0.63	0	0	0	0	0	0	0	0	LDA
68	9	female	0.62	0	0	0	0	0	0	0	0	0	LDA
29	9	female	5.46	0	0	0	0.291667	0	0	0.291667	0.291667	0.291667	LAR
68	11	female	4.35	0	0	0	0	0	0	0	0	0	LDA
48	11	female	10.24	1.25	0.5	0	0.25	0	0.5	0.25	0.75	0.559017	LAR
61	9	male	2.56	0	0	0	0	0	0	0	0	0	LDA
73	11	female	1.63	0	0	0	0	0	0	0	0	0	LDA
67	9	female	12.08	0.88	0.25	0.1	0	0	0.35	0	0.15	0.35	EVN
75	10	female	2.35	0	0	0	0	0	0	0	0	0	LDA
61	20	male	2.32	2.38	0	0	0	0	0	0	0	0	LDA
49	9	male	6.29	1	0	0.15	0.125	0	0.15	0.125	-0.025	0.195256	EVN
69	4	female	0.55	0	0	0	0	0	0	0	0	0	LDA
25	9	female	6.15	0.38	0	0	0	0	0	0	0	0	LDA
72	9	female	3.5	0	0.125	0	0	0	0.125	0	0.125	0.125	EVN
82	27	female	3.3	0.63	0	0	0	0	0	0	0	0	LDA
76	10	female	7.77	0	0	0.1	0	0.6	0.1	0.6	-0.7	0.608276	SML
43	16	female	11.74	0	0.125	0.1	0	0	0.225	0	0.025	0.225	EVN
60	9	male	3.54	0	0	0	0	0	0	0	0	0	LDA
44	19	female	14.35	0.13	0	0	0.25	0	0	0.25	0.25	0.25	LAR
77	10	male	7.12	0.13	0	0	0	0	0	0	0	0	LDA
67	14	female	12.55	1.38	0	0.3	0	0.9	0.3	0.9	-1.2	0.948683	SML
72	17	female	8.57	1.13	0	0	0	0	0	0	0	0	LDA
62	36	female	14.32	0.25	0.125	0.1	0.125	0	0.225	0.125	0.15	0.257391	EVN
67	2	female	18.13	0.38	0	0.75	0	0	0.75	0	-0.75	0.75	SML
53	10	female	4.65	0.63	0	0	0	0	0	0	0	0	LDA
76	18	female	13.41	2.63	0	0	0.25	0	0	0.25	0.25	0.25	LAR
83	12	female	1.25	0.75	0	0	0	0	0	0	0	0	LDA
67	9	male	2.34	0	0	0	0	0	0	0	0	0	LDA
66	10	male	0.13	0	0	0	0	0	0	0	0	0	LDA
87	36	female	6.54	1.75	0	0	0.125	0	0	0.125	0.125	0.125	EVN
74	34	male	1.65	0	0	0	0	0	0	0	0	0	LDA
73	44	female	9.41	0.88	0	0.2	0.166667	0	0.2	0.166667	-0.0333333	0.260342	EVN
87	8	female	10.12	1.25	0	0.2	0	0	0.2	0	-0.2	0.2	SML
67	19	female	0.82	1.13	0	0	0	0	0	0	0	0	LDA
77	23	female	5.1	0	0	0.1	0	0	0.1	0	-0.1	0.1	EVN
49	11	female	3.02	0	0	0.05	0	0	0.05	0	-0.05	0.05	LDA
74	11	female	3.08	0.25	0	0	0	0	0	0	0	0	LDA
58	9	female	2.08	0.13	0	0	0	0	0	0	0	0	LDA
58	9	female	0.27	0	0	0	0	0	0	0	0	0	LDA
79	9	male	1.74	0	0	0	0	0	0	0	0	0	LDA
55	13	female	4.97	0	0	0.05	0	0	0.05	0	-0.05	0.05	LDA
80	18	female	2.4	0	0	0	0	0	0	0	0	0	LDA
47	9	female	7.47	0.38	0.25	0.1	0	0	0.35	0	0.15	0.35	EVN
81	14	female	4.92	2.63	0	0	0.125	0	0	0.125	0.125	0.125	EVN
89	6	female	8.94	0.5	0	0	0	0	0	0	0	0	LDA
66	16	female	3.18	1.13	0	0	0	0	0	0	0	0	LDA
65	9	female	0.78	0	0	0	0	0	0	0	0	0	LDA
32	9	female	23.73	1	0.25	0.35	0	0	0.6	0	-0.1	0.6	EVN
66	9	female	2.55	0	0	0	0	0	0	0	0	0	LDA
66	9	male	1.3	0	0	0	0	0	0	0	0	0	LDA
33	9	female	7.78	2.5	0	0	0	0	0	0	0	0	LDA
69	9	female	1.39	0	0	0	0	0	0	0	0	0	LDA
67	6	female	0.48	0	0	0	0	0	0	0	0	0	LDA
23	9	female	1.54	0	0	0	0	0	0	0	0	0	LDA
61	26	male	11.52	0.25	0	0.35	0	0	0.35	0	-0.35	0.35	SML
86	9	female	1.77	0.25	0	0	0	0	0	0	0	0	LDA
74	14	female	0.76	0	0	0	0	0	0	0	0	0	LDA
70	1	female	1.6	0	0	0	0	0	0	0	0	0	LDA
86	9	female	11.05	0.5	0.25	0.25	0	0	0.5	0	0	0.5	EVN
78	9	female	1.12	0.25	0	0	0	0	0	0	0	0	LDA
60	9	female	8.35	0.5	0.25	0	0.166667	0	0.25	0.166667	0.416667	0.300463	LAR
51	9	female	3.19	0.25	0.125	0	0	0	0.125	0	0.125	0.125	EVN
53	9	female	5.74	0.25	0	0.05	0	0	0.05	0	-0.05	0.05	LDA
74	40	female	7.4	2.88	0	0	0	0	0	0	0	0	LDA
73	18	female	4.66	0.5	0	0	0.25	0	0	0.25	0.25	0.25	LAR
64	11	male	6.51	0.75	0	0	0	0	0	0	0	0	LDA
42	9	female	4.88	0.13	0	0	0	0	0	0	0	0	LDA
45	9	female	14.48	0.38	0.25	0.25	0	0	0.5	0	-7.45058e-09	0.5	EVN
69	9	female	2.14	0	0	0	0	0	0	0	0	0	LDA
65	8	male	8.03	0.5	0	0.1	0	0	0.1	0	-0.1	0.1	EVN
68	8	female	0.43	0	0	0	0	0	0	0	0	0	LDA
77	36	female	6.06	1.88	0	0	0.125	0	0	0.125	0.125	0.125	EVN
57	9	female	1.15	0	0	0	0	0	0	0	0	0	LDA
79	11	female	0.07	0	0	0	0	0	0	0	0	0	LDA
60	10	female	6.95	0.63	0.25	0	0	0	0.25	0	0.25	0.25	LAR
79	28	female	5.18	0.38	0	0	0	0	0	0	0	0	LDA
64	6	female	6.02	0.25	0.25	0	0	0	0.25	0	0.25	0.25	LAR
46	8	female	13.14	0.25	0	0.3	0	0	0.3	0	-0.3	0.3	SML
74	21	female	7.43	0.5	0.125	0.05	0	0	0.175	0	0.075	0.175	EVN
73	10	female	2.65	0.13	0.125	0	0	0	0.125	0	0.125	0.125	EVN
75	12	female	9.94	1.75	0	0	0	0	0	0	0	0	LDA
54	8	male	3.52	0	0	0	0	0	0	0	0	0	LDA
67	9	female	0.87	0	0	0	0	0	0	0	0	0	LDA
70	26	female	1.69	0.13	0	0	0	0	0	0	0	0	LDA
58	8	female	8.32	0.25	0	0	0.25	0	0	0.25	0.25	0.25	LAR
48	2	female	3.24	0.25	0	0	0	0	0	0	0	0	LDA
50	8	female	5.64	1	0.125	0	0	0	0.125	0	0.125	0.125	EVN
46	9	female	4.01	0	0.25	0	0	0	0.25	0	0.25	0.25	LAR
62	30	female	2.62	0.5	0	0	0	0	0	0	0	0	LDA
77	9	female	5.92	0.38	0.125	0	0	0	0.125	0	0.125	0.125	EVN
74	18	female	9.55	0.63	0.25	0.1	0.458333	0	0.35	0.458333	0.608333	0.576688	LAR
66	8	female	0.54	0	0	0	0	0	0	0	0	0	LDA
73	8	male	3.16	0.5	0	0	0	0	0	0	0	0	LDA
77	8	female	5.46	0.88	0	0	0	0	0	0	0	0	LDA
82	8	male	0.55	0	0	0	0	0	0	0	0	0	LDA
73	8	female	2.16	0.75	0	0	0	0	0	0	0	0	LDA
49	31	female	5.49	0.63	0.25	0	0	0	0.25	0	0.25	0.25	LAR
60	8	female	1.12	0	0	0	0	0	0	0	0	0	LDA
81	5	female	4.79	0.88	0	0.05	0	0	0.05	0	-0.05	0.05	LDA
46	8	female	3.16	0	0	0	0	0	0	0	0	0	LDA
68	9	female	7.86	0.88	0.5	0	0	0	0.5	0	0.5	0.5	LAR
64	19	female	7.82	0.75	0	0	0	0	0	0	0	0	LDA
81	8	female	13.2	0.25	0	0.3	0	0	0.3	0	-0.3	0.3	SML
42	8	female	0.86	0	0	0	0	0	0	0	0	0	LDA
63	12	female	6.48	0.5	0	0	0	0	0	0	0	0	LDA
69	8	male	8.84	0	0	0	0	0	0	0	0	0	LDA
68	42	female	15.15	1.25	0	0.55	0.25	0	0.55	0.25	-0.3	0.604152	SML
45	8	female	0.11	0	0	0	0	0	0	0	0	0	LDA
62	13	female	7.19	1.25	0.125	0	0.25	0	0.125	0.25	0.375	0.279508	LAR
71	10	male	9.1	0	0.5	0	0	0	0.5	0	0.5	0.5	LAR
70	8	female	4.69	0.13	0.125	0	0.125	0	0.125	0.125	0.25	0.176777	LAR
57	1	female	1.29	0.13	0	0	0	0	0	0	0	0	LDA
68	8	female	0.57	0	0	0	0	0	0	0	0	0	LDA
70	8	male	3.48	0.13	0	0	0	0	0	0	0	0	LDA
42	8	female	3.35	0	0.125	0	0	0	0.125	0	0.125	0.125	EVN
84	8	male	1.93	0.38	0	0	0	0	0	0	0	0	LDA
76	4	male	4.68	0	0.125	0.05	0	0	0.175	0	0.075	0.175	EVN
79	8	female	8.6	0.13	0	0	0	0	0	0	0	0	LDA
60	8	female	2.6	0	0	0	0	0	0	0	0	0	LDA
87	9	male	5.44	1.88	0	0	0	0	0	0	0	0	LDA
40	8	female	0.68	0	0	0	0	0	0	0	0	0	LDA
73	8	male	6.32	0	0	0	0	0	0	0	0	0	LDA
65	8	female	2.35	0	0	0	0	0	0	0	0	0	LDA
66	41	female	8.81	0.5	0.25	0	0	0	0.25	0	0.25	0.25	LAR
78	11	female	10.93	2.5	0	0	0	0	0	0	0	0	LDA
68	43	female	7.07	0.88	0	0	0.125	0	0	0.125	0.125	0.125	EVN
69	7	male	8.88	0.13	0	0.3	0	0	0.3	0	-0.3	0.3	SML
65	10	male	2.02	0	0	0	0	0	0	0	0	0	LDA
56	14	female	7.24	0	0.125	0.1	0.125	0	0.225	0.125	0.15	0.257391	EVN
78	8	female	9.61	0.5	0	0.15	0	0	0.15	0	-0.15	0.15	EVN
69	7	male	3.17	0.38	0	0	0	0	0	0	0	0	LDA
63	11	female	24.99	0.25	0.625	0.2	0.25	0	0.825	0.25	0.675	0.862047	LAR
50	19	female	5.99	1.88	0	0.1	0	0	0.1	0	-0.1	0.1	EVN
68	31	female	2.13	0.25	0	0	0	0	0	0	0	0	LDA
76	8	male	4.84	0.75	0	0	0	0	0	0	0	0	LDA
46	7	female	2.41	0.25	0	0	0	0	0	0	0	0	LDA
82	9	female	6.67	2.88	0	0	0	0	0	0	0	0	LDA
66	5	male	7.33	0.25	0	0	0.125	0	0	0.125	0.125	0.125	EVN
80	12	female	7.79	0.25	0	0	0.125	0	0	0.125	0.125	0.125	EVN
49	6	female	6.82	0.5	0	0	0.125	0	0	0.125	0.125	0.125	EVN
65	8	female	4.33	0.38	0	0	0	0	0	0	0	0	LDA
56	0	female	20.08	0.13	0	0.45	0	0	0.45	0	-0.45	0.45	SML
64	11	female	2.34	0.25	0	0	0	0	0	0	0	0	LDA
87	11	female	8.64	0.38	0.125	0	0.25	0	0.125	0.25	0.375	0.279508	LAR
43	9	female	66.23	0.75	1	2	1.16667	2	3	3.16667	-1.83333	4.36208	SML
63	12	female	2.26	0	0	0	0	0	0	0	0	0	LDA
71	14	female	14.49	2.88	0.25	0	0.125	0	0.25	0.125	0.375	0.279508	LAR
84	17	male	5.77	2.5	0.25	0	0	0	0.25	0	0.25	0.25	LAR
81	9	female	1.67	0	0	0	0	0	0	0	0	0	LDA
85	9	female	7.83	1.38	0	0	0.125	0	0	0.125	0.125	0.125	EVN
22	7	female	6.12	0.13	0.25	0.05	0	0	0.3	0	0.2	0.3	EVN
85	2	male	3.95	1.13	0	0	0	0	0	0	0	0	LDA
68	14	male	6.35	0	0.125	0	0.125	0	0.125	0.125	0.25	0.176777	LAR
68	41	female	4.76	1.13	0	0	0	0	0	0	0	0	LDA
64	9	female	3.45	0.38	0	0	0	0	0	0	0	0	LDA
64	7	female	29.13	2.5	0.375	0.8	0.5	1	1.175	1.5	-0.925	1.90542	SML
82	15	female	9.03	0.13	0	0	0.25	0	0	0.25	0.25	0.25	LAR
69	14	male	0.57	0	0	0	0	0	0	0	0	0	LDA
62	7	female	6.56	0.25	0.25	0	0	0	0.25	0	0.25	0.25	LAR
69	18	male	11.94	0	0.25	0.15	0.125	0	0.4	0.125	0.225	0.419076	LAR
71	7	female	8.84	0.13	0.25	0	0	0	0.25	0	0.25	0.25	LAR
72	10	female	5.36	0.63	0.125	0	0	0	0.125	0	0.125	0.125	EVN
62	7	female	6.02	0	0	0.05	0	0	0.05	0	-0.05	0.05	LDA
71	7	female	0.35	0	0	0	0	0	0	0	0	0	LDA
54	7	female	1.85	0.38	0	0	0	0	0	0	0	0	LDA
84	7	male	4.18	1.63	0	0	0.333333	0	0	0.333333	0.333333	0.333333	LAR
57	22	female	9.78	1.38	0.5	0	0	0	0.5	0	0.5	0.5	LAR
75	16	female	3.97	0	0	0	0	0	0	0	0	0	LDA
56	7	male	6.62	0	0	0.15	0	0	0.15	0	-0.15	0.15	EVN
35	10	female	4.69	0.5	0.125	0	0	0	0.125	0	0.125	0.125	EVN
76	1	female	14.72	0.13	0.25	0.2	0	0	0.45	0	0.05	0.45	EVN
57	9	male	3.26	0.38	0	0	0	0	0	0	0	0	LDA
63	7	female	3.88	0	0	0	0.166667	0	0	0.166667	0.166667	0.166667	EVN
56	12	female	14.01	0	0.5	0.05	0	0	0.55	0	0.45	0.55	LAR
85	11	female	5.28	1.13	0	0	0	0	0	0	0	0	LDA
67	7	female	4.07	0.5	0.125	0	0	0	0.125	0	0.125	0.125	EVN
82	16	male	3.44	0	0	0	0	0	0	0	0	0	LDA
52	49	female	14.89	2.75	0.5	0	0	0	0.5	0	0.5	0.5	LAR
64	8	male	9.44	0	0.25	0	0	0	0.25	0	0.25	0.25	LAR
48	30	female	8.16	1	0	0.1	0	0	0.1	0	-0.1	0.1	EVN
77	7	female	0.74	1.75	0	0	0	0	0	0	0	0	LDA
84	24	female	0.73	1.5	0	0	0	0	0	0	0	0	LDA
49	7	female	30.44	2	0.75	0.5	0.125	1	1.25	1.125	-0.625	1.6817	SML
66	23	male	1.97	0	0	0	0	0	0	0	0	0	LDA
36	7	female	0.56	0	0	0	0	0	0	0	0	0	LDA
46	13	female	1.73	0	0	0	0	0	0	0	0	0	LDA
70	12	female	2.65	0	0	0	0	0	0	0	0	0	LDA
23	7	male	2.01	0	0	0	0	0	0	0	0	0	LDA
67	8	female	0.85	0.25	0	0	0	0	0	0	0	0	LDA
48	7	female	3.97	0.88	0	0	0	0	0	0	0	0	LDA
72	7	male	0.11	0	0	0	0	0	0	0	0	0	LDA
61	4	female	7.64	0	0	0.2	0	0	0.2	0	-0.2	0.2	SML
74	38	female	19.77	2	0	0.3	0.541667	0	0.3	0.541667	0.241667	0.619195	LAR
64	7	male	12.3	0	0.5	0.1	0	0	0.6	0	0.4	0.6	LAR
52	7	female	0.82	0	0	0	0	0	0	0	0	0	LDA
52	7	female	6.55	0	0.25	0.05	0	0	0.3	0	0.2	0.3	EVN
77	17	male	4.41	0	0.25	0	0	0	0.25	0	0.25	0.25	LAR
61	24	female	5.47	0.75	0	0	0	0	0	0	0	0	LDA
47	36	female	3.96	3	0	0	0	0	0	0	0	0	LDA
63	11	male	2.73	0.38	0	0	0	0	0	0	0	0	LDA
74	7	female	17.66	1.75	0.125	0.05	0.833333	1	0.175	1.83333	-0.0916667	1.84167	EVN
45	6	female	12.14	0.25	0.25	0.25	0	0	0.5	0	-3.72529e-09	0.5	EVN
68	6	male	4.67	0.38	0.25	0	0	0	0.25	0	0.25	0.25	LAR
70	7	female	2.75	0	0	0	0	0	0	0	0	0	LDA
72	14	female	9.26	0.13	0.125	0	0.125	0	0.125	0.125	0.25	0.176777	LAR
43	7	female	17.79	1.38	0.25	0.35	0	0	0.6	0	-0.1	0.6	EVN
70	26	male	1.12	0	0	0	0	0	0	0	0	0	LDA
75	8	female	0.05	0	0	0	0	0	0	0	0	0	LDA
80	6	male	63.5	1.75	1	1.7	0.375	0	2.7	0.375	-0.325	2.72592	SML
75	16	male	3.54	0.13	0	0	0	0	0	0	0	0	LDA
50	2	female	1.53	0	0	0	0	0	0	0	0	0	LDA
70	9	female	0.11	0.25	0	0	0	0	0	0	0	0	LDA
69	9	female	1.65	0.25	0	0	0	0	0	0	0	0	LDA
53	7	female	5.92	1	0.125	0	0.166667	0	0.125	0.166667	0.291667	0.208333	LAR
45	4	female	1.35	0	0	0	0	0	0	0	0	0	LDA
58	4	male	0.81	0	0	0	0	0	0	0	0	0	LDA
49	10	male	11.03	0	0.25	0	0	0	0.25	0	0.25	0.25	LAR
54	9	male	6.6	0.5	0.25	0	0	0	0.25	0	0.25	0.25	LAR
65	6	female	27.14	1.13	0.5	0.6	0.333333	2	1.1	2.33333	-1.76667	2.57962	SML
73	7	female	5.34	0	0.125	0.05	0.125	0.2	0.175	0.325	-3.72529e-09	0.369121	EVN
50	7	female	6.96	0	0	0	0	0	0	0	0	0	LDA
68	7	female	10.22	0.75	0.25	0	0	0	0.25	0	0.25	0.25	LAR
34	15	female	1.92	0.63	0	0	0	0	0	0	0	0	LDA
50	6	female	0.12	0	0	0	0	0	0	0	0	0	LDA
69	8	female	0.35	0	0	0	0	0	0	0	0	0	LDA
66	6	female	0.4	0	0	0	0	0	0	0	0	0	LDA
66	6	female	0.36	0	0	0	0	0	0	0	0	0	LDA
75	7	female	6.93	0.25	0	0	0	0	0	0	0	0	LDA
49	6	male	4.69	0.13	0	0	0	0	0	0	0	0	LDA
66	6	female	8.67	0	0	0.2	0	0	0.2	0	-0.2	0.2	SML
76	23	male	6.68	0.63	0	0	0	0	0	0	0	0	LDA
61	7	male	8.44	0	0	0.2	0	0.3	0.2	0.3	-0.5	0.360555	SML
72	9	male	8.19	0	0.25	0.05	0	0	0.3	0	0.2	0.3	EVN
42	6	male	15.08	0	0.125	0.1	0.25	0	0.225	0.25	0.275	0.336341	LAR
67	3	female	0.91	0	0	0	0	0	0	0	0	0	LDA
75	9	male	23.24	2.75	0.5	0.3	0.25	0.5	0.8	0.75	-0.05	1.09659	EVN
68	45	female	14.48	0.75	0.5	0.1	0	0	0.6	0	0.4	0.6	LAR
73	8	male	1.1	0	0	0	0	0	0	0	0	0	LDA
59	26	female	8.69	0.13	0.125	0	0.416667	0	0.125	0.416667	0.541667	0.435013	LAR
54	8	female	8.69	1	0.25	0.1	0.166667	0	0.35	0.166667	0.316667	0.387657	LAR
69	8	female	19.24	2.13	0.25	0.3	0	0	0.55	0	-0.05	0.55	EVN
60	7	male	0.33	0	0	0	0	0	0	0	0	0	LDA
45	6	male	0.09	0	0	0	0	0	0	0	0	0	LDA
68	6	female	0.43	0.5	0	0	0	0	0	0	0	0	LDA
76	8	female	1.03	1.38	0	0	0	0	0	0	0	0	LDA
57	6	female	2.34	0	0	0	0	0	0	0	0	0	LDA
38	6	female	2.13	0.25	0	0	0	0	0	0	0	0	LDA
46	6	male	6.22	0.38	0	0	0	1	0	1	-1	1	SML
59	6	female	2.32	0	0	0	0	0	0	0	0	0	LDA
70	6	male	1.24	0	0	0	0	0	0	0	0	0	LDA
48	6	female	3.3	0.13	0	0	0	0	0	0	0	0	LDA
67	33	female	12.16	1.88	0.125	0	0.166667	0	0.125	0.166667	0.291667	0.208333	LAR
70	21	female	6.95	0.25	0.125	0	0	0	0.125	0	0.125	0.125	EVN
37	6	female	1.89	0.38	0	0	0	0	0	0	0	0	LDA
73	7	female	5.68	0.5	0	0	0	0	0	0	0	0	LDA
69	7	female	2.14	0.13	0	0	0	0	0	0	0	0	LDA
57	6	female	2.59	0	0.125	0	0	0	0.125	0	0.125	0.125	EVN
61	6	female	0.74	0.13	0	0	0	0	0	0	0	0	LDA
45	7	female	13.85	0.38	0	0.15	0	0	0.15	0	-0.15	0.15	EVN
66	6	female	2.88	0.25	0	0	0	0	0	0	0	0	LDA
86	10	female	2.38	0.38	0	0	0	0	0	0	0	0	LDA
75	25	female	2.42	3	0	0	0	0	0	0	0	0	LDA
31	7	female	5.23	0	0.25	0	0	0	0.25	0	0.25	0.25	LAR
69	6	male	1.35	0	0	0	0	0	0	0	0	0	LDA
62	6	male	1.44	0	0	0	0	0	0	0	0	0	LDA
74	9	female	8.75	1.88	0	0	0	0	0	0	0	0	LDA
58	9	female	11.55	0.63	0	0.2	0	0	0.2	0	-0.2	0.2	SML
89	6	male	0.51	0	0	0	0	0	0	0	0	0	LDA
67	8	female	0.17	0	0	0	0	0	0	0	0	0	LDA
47	6	female	5.08	0.38	0.25	0	0	0	0.25	0	0.25	0.25	LAR
74	12	male	6.33	0	0	0.1	0	0	0.1	0	-0.1	0.1	EVN
61	7	male	1.88	0	0	0	0	0	0	0	0	0	LDA
43	1	female	9.9	0.13	0	0	0.375	0	0	0.375	0.375	0.375	LAR
59	5	male	3.1	0	0.125	0	0	0	0.125	0	0.125	0.125	EVN
23	6	female	0.78	0	0	0	0	0	0	0	0	0	LDA
70	5	female	7	0	0	0.2	0	0	0.2	0	-0.2	0.2	SML
69	8	female	1.08	0	0	0	0	0	0	0	0	0	LDA
43	6	female	1.72	0.25	0	0.05	0	0	0.05	0	-0.05	0.05	LDA
74	6	female	0.94	0.38	0	0	0	0	0	0	0	0	LDA
53	20	female	10.04	1	0.25	0.15	0.125	0	0.4	0.125	0.225	0.419076	LAR
73	19	female	12.17	1.75	0.5	0	0.25	0	0.5	0.25	0.75	0.559017	LAR
80	5	female	2.87	0.38	0	0	0	0	0	0	0	0	LDA
57	5	male	1.41	0	0	0	0	0	0	0	0	0	LDA
66	30	female	2.79	0.13	0	0	0	0	0	0	0	0	LDA
58	41	female	4.14	0.25	0	0.1	0	0	0.1	0	-0.1	0.1	EVN
75	5	female	15.61	1.63	0.25	0.2	0	0	0.45	0	0.05	0.45	EVN
63	5	female	2.65	0	0	0	0	0	0	0	0	0	LDA
74	19	female	1.92	0.75	0	0	0	0	0	0	0	0	LDA
68	4	male	1.91	0	0	0	0	0	0	0	0	0	LDA
68	12	male	1.14	0.13	0	0	0	0	0	0	0	0	LDA
55	5	female	1.71	0	0.125	0	0	0	0.125	0	0.125	0.125	EVN
75	9	female	7.81	0.63	0.5	0	0	0	0.5	0	0.5	0.5	LAR
62	9	male	19.71	0	0.25	0.6	0	0	0.85	0	-0.35	0.85	SML
56	12	female	22.53	0	0.5	0.45	0	0	0.95	0	0.05	0.95	EVN
84	5	male	0.76	0	0	0	0	0	0	0	0	0	LDA
78	28	female	8.24	0.88	0.5	0.05	0.125	0.4	0.55	0.525	0.175	0.760345	EVN
73	6	female	0.67	0.13	0	0	0	0	0	0	0	0	LDA
47	5	female	0.99	0	0	0	0	0	0	0	0	0	LDA
52	6	female	1.25	0	0	0	0	0	0	0	0	0	LDA
50	10	female	0.56	0	0	0	0	0	0	0	0	0	LDA
58	5	female	3.02	0	0.125	0	0	0	0.125	0	0.125	0.125	EVN
34	6	female	11.72	1.25	0.625	0	0.5	0	0.625	0.5	1.125	0.800391	LAR
72	6	female	9.44	0.63	0.125	0.15	0.291667	0	0.275	0.291667	0.266667	0.400867	LAR
68	5	male	2.54	0	0	0	0	0	0	0	0	0	LDA
85	6	female	7.3	0.63	0	0	0	0	0	0	0	0	LDA
69	12	male	6.28	1.63	0	0	0	0	0	0	0	0	LDA
56	19	female	12.96	0	0.25	0.1	0	0	0.35	0	0.15	0.35	EVN
79	36	male	7.23	1.25	0	0	0	0	0	0	0	0	LDA
64	15	female	1.82	0.25	0	0	0	0	0	0	0	0	LDA
37	6	female	2.62	0.38	0	0	0	0	0	0	0	0	LDA
76	35	male	13.46	0.5	0	0.2	0	0	0.2	0	-0.2	0.2	SML
36	6	female	11.69	0.5	0.25	0.1	0	0	0.35	0	0.15	0.35	EVN
62	6	female	7.45	0.63	0	0.1	0	0	0.1	0	-0.1	0.1	EVN
65	5	female	0.45	0	0	0	0	0	0	0	0	0	LDA
48	10	female	0.44	0	0	0	0	0	0	0	0	0	LDA
71	7	female	8.35	0.38	0	0.05	0	0	0.05	0	-0.05	0.05	LDA
71	8	female	2.08	0.5	0	0	0	0	0	0	0	0	LDA
56	6	female	0.49	0	0	0	0	0	0	0	0	0	LDA
72	2	female	12.04	1.25	0.5	0.1	0	0	0.6	0	0.4	0.6	LAR
65	5	female	13.13	0	0.25	0.15	0.416667	0.1	0.4	0.516667	0.416667	0.65341	LAR
72	4	female	3.45	0.38	0	0.1	0	0	0.1	0	-0.1	0.1	EVN
65	8	female	8.92	3	0	0	0	0	0	0	0	0	LDA
66	10	female	5.5	0	0.25	0	0	0	0.25	0	0.25	0.25	LAR
74	37	female	12.47	2.63	0.125	0.1	0.125	0	0.225	0.125	0.15	0.257391	EVN
72	20	male	18.82	2.25	0.25	0.15	0.25	0	0.4	0.25	0.35	0.471699	LAR
45	12	female	7.74	0.38	0.625	0	0	0	0.625	0	0.625	0.625	LAR
75	5	female	4.36	0.25	0	0	0	0	0	0	0	0	LDA
72	7	female	2.34	0.38	0	0	0	0	0	0	0	0	LDA
88	12	female	8.67	3	0	0	0	0	0	0	0	0	LDA
39	3	female	3.92	0	0	0	0.125	0	0	0.125	0.125	0.125	EVN
72	5	female	0.1	0	0	0	0	0	0	0	0	0	LDA
50	5	female	0.55	0	0	0	0	0	0	0	0	0	LDA
48	4	male	2.21	0	0	0	0	0	0	0	0	0	LDA
76	19	female	0.74	0	0	0	0	0	0	0	0	0	LDA
66	23	female	3.73	1.38	0	0	0	0	0	0	0	0	LDA
75	5	female	2.64	0.13	0.25	0	0	0	0.25	0	0.25	0.25	LAR
67	7	female	1.64	0.13	0	0	0	0	0	0	0	0	LDA
77	18	female	0.74	0	0	0	0	0	0	0	0	0	LDA
74	21	female	6.01	0.75	0	0.1	0	0	0.1	0	-0.1	0.1	EVN
71	6	female	3.04	0.75	0	0	0	0	0	0	0	0	LDA
49	4	female	6.12	0.5	0	0	0	0	0	0	0	0	LDA
58	5	female	1.09	0.38	0	0	0	0	0	0	0	0	LDA
75	5	female	4.33	0.13	0	0	0.125	0	0	0.125	0.125	0.125	EVN
81	5	female	4.89	0	0.25	0	0	0	0.25	0	0.25	0.25	LAR
45	6	female	10.12	0.38	0.125	0.1	0.125	0	0.225	0.125	0.15	0.257391	EVN
46	3	female	4.55	0.13	0	0.1	0	0	0.1	0	-0.1	0.1	EVN
41	5	female	0.82	0	0	0	0	0	0	0	0	0	LDA
76	5	male	4.57	0.63	0	0	0	0	0	0	0	0	LDA
75	5	female	1.34	0.25	0	0	0	0	0	0	0	0	LDA
70	5	female	1.13	0	0	0	0	0	0	0	0	0	LDA
55	5	female	10.77	0.13	0	0.3	0	0	0.3	0	-0.3	0.3	SML
52	5	female	4.67	0.38	0	0	0	0	0	0	0	0	LDA
71	38	female	4.32	0.75	0.125	0	0	0	0.125	0	0.125	0.125	EVN
78	20	male	1.8	0	0	0	0	0	0	0	0	0	LDA
68	41	female	20.22	0.63	0	0.5	0.25	0	0.5	0.25	-0.25	0.559017	SML
69	5	female	1.66	0	0	0	0	0	0	0	0	0	LDA
73	17	female	12.68	2.13	0.125	0	0.125	0	0.125	0.125	0.25	0.176777	LAR
62	11	male	10.07	0.75	0.125	0	0	0	0.125	0	0.125	0.125	EVN
68	4	female	6.5	0.13	0.375	0	0.291667	0	0.375	0.291667	0.666667	0.475073	LAR
38	5	female	7.29	1.13	0.25	0	0	0	0.25	0	0.25	0.25	LAR
79	2	female	8.31	0.75	0	0	0.125	0	0	0.125	0.125	0.125	EVN
70	5	female	5.78	0.5	0.125	0.05	0	0	0.175	0	0.075	0.175	EVN
69	5	female	3.63	0	0	0.1	0	0	0.1	0	-0.1	0.1	EVN
77	4	female	0.75	0	0	0	0	0	0	0	0	0	LDA
46	6	female	14.92	0	0.375	0.3	0	0	0.675	0	0.075	0.675	EVN
83	4	female	1.46	0	0	0	0	0	0	0	0	0	LDA
55	5	male	0.94	0	0	0	0	0	0	0	0	0	LDA
64	9	male	6.65	0	0	0	0	0	0	0	0	0	LDA
75	5	male	5.04	0	0	0	0	0	0	0	0	0	LDA
66	4	female	3.98	0.88	0	0	0	0	0	0	0	0	LDA
44	13	female	1.15	0.5	0	0	0	0	0	0	0	0	LDA
28	5	female	1.95	0	0	0	0	0	0	0	0	0	LDA
80	5	female	5.92	0.88	0	0	0	0	0	0	0	0	LDA
62	24	female	7.17	0	0	0.1	0	0	0.1	0	-0.1	0.1	EVN
49	9	female	2.19	0	0	0.05	0	0.1	0.05	0.1	-0.15	0.111803	EVN
45	5	female	5.28	0.75	0.25	0	0	0	0.25	0	0.25	0.25	LAR
70	4	male	17.65	1.38	0.75	0	0.5	0	0.75	0.5	1.25	0.901388	LAR
50	5	female	23.18	1	0.5	0.4	0	0	0.9	0	0.1	0.9	EVN
65	7	female	9.91	0.75	0.25	0	0.166667	0	0.25	0.166667	0.416667	0.300463	LAR
75	4	female	6.55	0	0	0.1	0	0	0.1	0	-0.1	0.1	EVN
48	5	male	7.19	0.13	0.25	0	0	0	0.25	0	0.25	0.25	LAR
36	5	female	6.12	0.13	0.25	0	0	0	0.25	0	0.25	0.25	LAR
32	4	male	1.34	0	0	0	0	0	0	0	0	0	LDA
53	5	female	2.75	0	0	0	0	0	0	0	0	0	LDA
55	12	female	3.75	0	0	0	0	0	0	0	0	0	LDA
48	4	female	0.02	0	0	0	0	0	0	0	0	0	LDA
66	4	female	5.39	0.13	0	0	0	0	0	0	0	0	LDA
54	5	male	0.14	0	0	0	0	0	0	0	0	0	LDA
54	13	male	3.2	0	0	0	0	0	0	0	0	0	LDA
50	4	female	3.32	0.13	0	0	0	0	0	0	0	0	LDA
89	1	female	12.18	0.63	0.25	0	0.166667	0	0.25	0.166667	0.416667	0.300463	LAR
72	5	female	4.06	0	0.125	0	0	0	0.125	0	0.125	0.125	EVN
62	4	female	0.93	0	0	0	0	0	0	0	0	0	LDA
77	17	female	9.69	1.5	0.25	0.1	0	0.2	0.35	0.2	-0.05	0.403113	EVN
78	4	female	4.56	0.75	0	0	0.25	0	0	0.25	0.25	0.25	LAR
42	8	female	1.02	0.13	0	0	0	0	0	0	0	0	LDA
82	4	female	6.57	0	0	0	0	0	0	0	0	0	LDA
78	13	female	2.13	0.5	0	0	0	0	0	0	0	0	LDA
67	7	male	6.62	0	0	0	0	0	0	0	0	0	LDA
47	5	female	6.15	0.63	0	0	0.125	0	0	0.125	0.125	0.125	EVN
67	4	female	11.09	0.25	0.375	0	0.125	0	0.375	0.125	0.5	0.395285	LAR
72	7	female	2.31	0.13	0	0	0	0	0	0	0	0	LDA
60	4	female	4.76	0	0	0.15	0	0	0.15	0	-0.15	0.15	EVN
41	5	female	11.15	0.63	0.25	0	0.291667	0	0.25	0.291667	0.541667	0.384148	LAR
58	15	female	10.57	0.5	0.125	0.15	0	0	0.275	0	-0.025	0.275	EVN
51	22	female	7.6	1	0	0.15	0	0	0.15	0	-0.15	0.15	EVN
63	4	male	0.26	0	0	0	0	0	0	0	0	0	LDA
75	7	female	16.13	1	0.5	0.15	0	0.2	0.65	0.2	0.15	0.680074	EVN
55	3	female	4.11	0.13	0	0	0.375	0	0	0.375	0.375	0.375	LAR
74	5	female	2.22	0.25	0	0	0	0	0	0	0	0	LDA
69	43	female	9.74	2.88	0.125	0	0	0	0.125	0	0.125	0.125	EVN
39	4	female	4.55	0.13	0	0	0	0	0	0	0	0	LDA
68	8	female	1.7	0	0	0.05	0	0	0.05	0	-0.05	0.05	LDA
51	4	female	4.84	0.38	0	0	0	0	0	0	0	0	LDA
44	9	female	13.71	1.88	0.5	0	0.458333	0	0.5	0.458333	0.958333	0.678284	LAR
59	4	female	3.42	0.38	0	0	0	0	0	0	0	0	LDA
71	41	female	4.96	1	0.125	0	0	0	0.125	0	0.125	0.125	EVN
79	7	female	6.77	0.75	0.25	0.05	0	0	0.3	0	0.2	0.3	EVN
84	5	female	6.03	1.13	0	0	0	0	0	0	0	0	LDA
59	13	male	20.41	2.25	0	0	0.25	0	0	0.25	0.25	0.25	LAR
40	5	female	0.66	0	0	0	0	0	0	0	0	0	LDA
78	4	female	0.47	0	0	0	0	0	0	0	0	0	LDA
69	4	female	34.17	1	0.125	0.9	0.583333	1.2	1.025	1.78333	-1.39167	2.05692	SML
79	5	female	0.15	0	0	0	0	0	0	0	0	0	LDA
81	4	female	1.94	2.38	0	0	0	0	0	0	0	0	LDA
75	13	female	1.17	0	0	0	0	0	0	0	0	0	LDA
52	26	male	4.61	1	0	0	0	0	0	0	0	0	LDA
64	4	female	12.27	0	0.5	0	0	0	0.5	0	0.5	0.5	LAR
65	6	female	6.62	0.63	0	0	0.291667	0	0	0.291667	0.291667	0.291667	LAR
60	4	male	2.26	0	0	0.05	0	0	0.05	0	-0.05	0.05	LDA
75	41	female	2.72	2.5	0	0	0.166667	0	0	0.166667	0.166667	0.166667	EVN
73	4	female	0.96	0	0	0	0	0	0	0	0	0	LDA
68	4	female	3.7	0	0	0	0	0	0	0	0	0	LDA
84	5	female	2.37	0.25	0	0	0	0	0	0	0	0	LDA
55	4	male	0.32	0	0	0	0	0	0	0	0	0	LDA
69	4	female	39.15	0	0.75	0.9	0	0	1.65	0	-0.15	1.65	EVN
57	6	female	3.43	0	0	0.1	0	0	0.1	0	-0.1	0.1	EVN
75	5	female	6.46	0.38	0	0	0.25	0	0	0.25	0.25	0.25	LAR
71	7	female	8.78	0.88	0	0	0.125	0	0	0.125	0.125	0.125	EVN
59	4	female	5.46	0.38	0	0	0	0	0	0	0	0	LDA
66	6	female	2.45	0.63	0	0	0	0	0	0	0	0	LDA
68	8	female	1.8	0.25	0	0	0	0.2	0	0.2	-0.2	0.2	SML
31	4	female	2.19	0	0	0	0	0	0	0	0	0	LDA
81	4	female	27.38	2	0.25	0.35	0	0	0.6	0	-0.1	0.6	EVN
58	15	male	1.22	0	0	0	0	0	0	0	0	0	LDA
75	4	female	18.63	2.25	0.25	0.05	0.833333	0	0.3	0.833333	1.03333	0.885689	LAR
78	4	male	1.82	0	0	0	0	0	0	0	0	0	LDA
40	4	female	29.94	0.63	0.625	0.4	0.125	0	1.025	0.125	0.35	1.03259	LAR
67	4	female	0.32	0.13	0	0	0	0	0	0	0	0	LDA
43	4	female	1.99	0.63	0	0	0	0	0	0	0	0	LDA
69	6	male	3.78	0	0	0	0	0	0	0	0	0	LDA
66	4	male	0.09	0	0	0	0	0	0	0	0	0	LDA
74	4	female	3.86	0.25	0	0	0	0	0	0	0	0	LDA
35	5	female	3.32	0	0	0	0.166667	0	0	0.166667	0.166667	0.166667	EVN
51	4	female	3.6	0	0	0.05	0	0	0.05	0	-0.05	0.05	LDA
70	4	female	8.35	0	0	0	0	0	0	0	0	0	LDA
66	16	female	2.51	0	0	0	0	0	0	0	0	0	LDA
65	4	male	2.17	0	0	0	0	0	0	0	0	0	LDA
66	9	male	9.24	0	0	0.25	0	0	0.25	0	-0.25	0.25	SML
51	12	female	0.73	0	0	0	0	0	0	0	0	0	LDA
67	7	female	6.8	3	0	0	0	0	0	0	0	0	LDA
58	5	female	5.41	0.38	0	0.1	0	0.1	0.1	0.1	-0.2	0.141421	SML
52	23	female	4.33	1.75	0	0	0.125	0	0	0.125	0.125	0.125	EVN
56	3	female	10.2	1.38	0	0	0.125	0	0	0.125	0.125	0.125	EVN
46	4	female	0.25	0	0	0	0	0	0	0	0	0	LDA
69	4	female	13.61	0	0.125	0.15	0	1	0.275	1	-1.025	1.03712	SML
70	22	female	4.48	0.75	0	0	0	0	0	0	0	0	LDA
56	8	female	3.96	0.13	0	0	0	0	0	0	0	0	LDA
59	7	female	10.34	0.25	0.25	0.15	0	0	0.4	0	0.1	0.4	EVN
26	12	male	3.48	1.63	0	0	0	0	0	0	0	0	LDA
51	4	female	3.93	0	0	0	0.25	0	0	0.25	0.25	0.25	LAR
71	28	female	2.36	1.25	0	0	0	0	0	0	0	0	LDA
68	4	female	11.33	0.75	0	0.2	0	0	0.2	0	-0.2	0.2	SML
61	5	female	2.35	0	0	0.05	0	0	0.05	0	-0.05	0.05	LDA
46	11	female	12.97	0	0	0.2	0.125	0	0.2	0.125	-0.075	0.23585	EVN
75	11	female	0.23	0.88	0	0	0	0	0	0	0	0	LDA
68	22	female	4.09	0.88	0	0	0.333333	0	0	0.333333	0.333333	0.333333	LAR
47	5	female	1.76	0.25	0	0	0	0	0	0	0	0	LDA
80	3	male	2.41	0	0	0	0	0	0	0	0	0	LDA
50	3	female	12	0.5	0.25	0.1	0	0	0.35	0	0.15	0.35	EVN
45	3	female	7.75	0	0	0	0	0	0	0	0	0	LDA
76	6	female	5.22	2.38	0	0	0	0	0	0	0	0	LDA
49	7	female	2.17	0	0	0	0	0	0	0	0	0	LDA
83	3	male	1.86	0.25	0	0	0	0	0	0	0	0	LDA
64	4	male	14.21	1.13	0.25	0	0.125	0	0.25	0.125	0.375	0.279508	LAR
74	4	male	5.01	0.13	0	0	0	0	0	0	0	0	LDA
74	19	female	8.43	0.63	0	0.05	0	0.3	0.05	0.3	-0.35	0.304138	SML
60	9	female	5.1	1.25	0	0	0	0	0	0	0	0	LDA
82	29	female	0.66	0	0	0	0	0	0	0	0	0	LDA
42	5	female	5.82	0.63	0	0	0.25	0	0	0.25	0.25	0.25	LAR
77	3	male	8.15	0.38	0.125	0	0	0	0.125	0	0.125	0.125	EVN
80	5	female	11.72	2.25	0.25	0	0	0	0.25	0	0.25	0.25	LAR
68	20	female	11.77	1	0.125	0.15	0	0.2	0.275	0.2	-0.225	0.340037	SML
69	6	male	2.72	0.5	0	0	0	0	0	0	0	0	LDA
68	38	male	1.83	0.25	0	0	0	0	0	0	0	0	LDA
64	11	female	10.07	0.75	0.25	0.2	0	0	0.45	0	0.05	0.45	EVN
36	3	female	1.42	0	0	0	0	0	0	0	0	0	LDA
72	5	female	2.77	2.88	0	0	0	0	0	0	0	0	LDA
75	7	male	5.9	0	0	0.15	0	0	0.15	0	-0.15	0.15	EVN
48	4	male	3.83	0	0	0	0	0	0	0	0	0	LDA
68	24	female	2.32	0.63	0	0	0.125	0	0	0.125	0.125	0.125	EVN
73	9	female	7.9	0.25	0	0.1	0	0	0.1	0	-0.1	0.1	EVN
77	24	female	8.55	2.75	0	0	0.25	0	0	0.25	0.25	0.25	LAR
57	2	female	3.17	0.88	0	0	0	0	0	0	0	0	LDA
65	18	female	4.99	0.38	0	0	0	0	0	0	0	0	LDA
63	6	male	0.22	0	0	0	0	0	0	0	0	0	LDA
54	3	female	6.79	0.88	0	0	0	0	0	0	0	0	LDA
74	4	female	2.43	0	0	0	0	0	0	0	0	0	LDA
73	4	female	5.42	0.88	0	0	0	0	0	0	0	0	LDA
29	7	female	4.24	0	0.25	0	0	0	0.25	0	0.25	0.25	LAR
59	4	female	0.58	0.13	0	0	0	0	0	0	0	0	LDA
49	3	female	0.25	0	0	0	0	0	0	0	0	0	LDA
38	3	male	1.54	0	0	0	0	0	0	0	0	0	LDA
68	3	female	5.15	1.13	0	0	0.125	0	0	0.125	0.125	0.125	EVN
41	1	female	6.83	0	0.25	0	0	0	0.25	0	0.25	0.25	LAR
31	4	female	6.95	0	0.5	0	0	0	0.5	0	0.5	0.5	LAR
69	3	female	8.55	0.5	0	0	0	0	0	0	0	0	LDA
76	22	female	5.56	1	0.25	0	0	0	0.25	0	0.25	0.25	LAR
68	5	female	12.09	1	0.5	0	0	0	0.5	0	0.5	0.5	LAR
57	3	female	4.65	0.13	0	0	0.583333	0	0	0.583333	0.583333	0.583333	LAR
57	4	female	0.3	0	0	0	0	0	0	0	0	0	LDA
76	13	female	12.13	0.75	0.375	0.1	0	0	0.475	0	0.275	0.475	LAR
64	3	female	1.89	0.75	0	0	0	0	0	0	0	0	LDA
66	3	female	37.25	2.13	0.75	0.5	0.833333	0	1.25	0.833333	1.08333	1.50231	LAR
75	3	female	6.58	0.13	0	0	0	0	0	0	0	0	LDA
56	3	female	0.42	0	0	0	0	0	0	0	0	0	LDA
80	3	female	1.57	0.38	0	0	0	0	0	0	0	0	LDA
74	3	female	1	0	0	0	0	0	0	0	0	0	LDA
78	5	female	5.22	1.5	0	0	0	0	0	0	0	0	LDA
38	5	female	2.14	0.25	0	0	0	0	0	0	0	0	LDA
85	31	female	4.7	2.75	0	0	0	0	0	0	0	0	LDA
58	3	female	4.46	0.25	0	0.05	0	0	0.05	0	-0.05	0.05	LDA
63	11	male	9.73	0	0	0	0.291667	0	0	0.291667	0.291667	0.291667	LAR
58	3	male	2.24	0.13	0	0	0	0	0	0	0	0	LDA
44	3	female	1.66	0	0	0	0	0.3	0	0.3	-0.3	0.3	SML
16	3	female	0.54	0	0	0	0	0	0	0	0	0	LDA
70	30	female	4.79	2	0	0	0	0	0	0	0	0	LDA
67	3	male	10.75	0	0.125	0.25	0	0	0.375	0	-0.125	0.375	EVN
62	3	male	1.26	0	0	0	0	0	0	0	0	0	LDA
50	1	female	23.54	0.25	0.5	0.4	0.5	1	0.9	1.5	-0.4	1.74929	SML
74	10	female	0.46	0	0	0	0	0	0	0	0	0	LDA
45	5	female	7.95	0	0.125	0.15	0	0	0.275	0	-0.025	0.275	EVN
64	3	male	0.46	0	0	0	0	0	0	0	0	0	LDA
77	9	male	2.61	0	0	0	0	0	0	0	0	0	LDA
58	6	male	14.08	0.88	0	0.4	0	0	0.4	0	-0.4	0.4	SML
56	3	female	14.18	0.75	0.25	0.3	0.541667	1	0.55	1.54167	-0.508333	1.63684	SML
73	3	female	5.62	0.13	0.125	0	0	0	0.125	0	0.125	0.125	EVN
42	15	female	4.43	0	0.125	0	0	0	0.125	0	0.125	0.125	EVN
54	8	female	2.9	0	0	0.05	0	0	0.05	0	-0.05	0.05	LDA
75	4	female	1.73	0.38	0	0	0	0	0	0	0	0	LDA
47	11	female	1.64	0	0.125	0	0	0	0.125	0	0.125	0.125	EVN
45	3	female	3.82	0.13	0	0	0	0.6	0	0.6	-0.6	0.6	SML
66	3	female	0.58	0.13	0	0	0	0	0	0	0	0	LDA
79	9	female	2.03	0.13	0	0	0	0	0	0	0	0	LDA
32	3	female	1.02	0	0	0	0	0	0	0	0	0	LDA
26	3	female	3.9	0	0.125	0	0	0	0.125	0	0.125	0.125	EVN
70	3	female	8.48	0.63	0	0.15	0	0	0.15	0	-0.15	0.15	EVN
61	5	female	1.78	0	0	0	0	0	0	0	0	0	LDA
75	3	male	6.66	0	0	0.2	0	0	0.2	0	-0.2	0.2	SML
68	3	male	0.52	0	0	0	0	0	0	0	0	0	LDA
76	13	female	1.87	0	0	0	0	0	0	0	0	0	LDA
71	3	male	0.2	0	0	0	0	0	0	0	0	0	LDA
82	5	female	5.59	1	0	0	0	0	0	0	0	0	LDA
69	5	female	7.89	0.25	0	0	0.333333	0	0	0.333333	0.333333	0.333333	LAR
61	8	female	0.69	0.25	0	0	0	0	0	0	0	0	LDA
72	2	female	1.03	0.5	0	0	0	0	0	0	0	0	LDA
40	10	female	1.42	0.25	0	0	0	0	0	0	0	0	LDA
72	3	female	1.3	0	0	0	0	0	0	0	0	0	LDA
63	4	female	4.41	1	0	0	0.125	0	0	0.125	0.125	0.125	EVN
68	3	female	17.15	0.13	0.5	0.4	0.333333	1	0.9	1.33333	-0.566667	1.60866	SML
46	3	female	27.97	0.38	0.625	0.55	0.25	0.8	1.175	1.05	-0.475	1.57579	SML
64	7	female	7	0.25	0	0	0	0	0	0	0	0	LDA
60	5	female	5.21	0	0	0	0	0	0	0	0	0	LDA
64	4	female	1.04	0	0	0	0	0	0	0	0	0	LDA
62	4	female	2.28	0	0	0	0	0	0	0	0	0	LDA
75	34	female	11.87	3	0.125	0.1	0	0	0.225	0	0.025	0.225	EVN
44	3	female	1.22	0.75	0	0	0	0	0	0	0	0	LDA
50	9	female	15.64	0.75	0.25	0.15	0	0	0.4	0	0.1	0.4	EVN
58	2	female	1.89	0.13	0	0.05	0	0	0.05	0	-0.05	0.05	LDA
24	3	female	0.24	0	0	0	0	0	0	0	0	0	LDA
68	10	female	4.33	0.38	0	0	0.25	0	0	0.25	0.25	0.25	LAR
69	3	female	3.7	0	0	0.05	0	0	0.05	0	-0.05	0.05	LDA
89	3	female	4.02	0.75	0	0	0	0	0	0	0	0	LDA
63	2	female	20.14	0.25	0.25	0.45	0.25	0	0.7	0.25	0.05	0.743303	EVN
77	4	male	9.67	1.25	0.125	0.05	0	0	0.175	0	0.075	0.175	EVN
69	18	female	21.23	2.25	0	0.6	0.375	0.5	0.6	0.875	-0.725	1.06095	SML
76	3	female	1.82	0.13	0	0	0	0	0	0	0	0	LDA
42	2	female	5.56	0.38	0	0.05	0	0	0.05	0	-0.05	0.05	LDA
89	13	female	5.01	1.25	0	0	0	0	0	0	0	0	LDA
62	14	female	15.92	0.25	0.125	0.4	0	0	0.525	0	-0.275	0.525	SML
48	2	female	14.19	1	0.5	0	0.25	0	0.5	0.25	0.75	0.559017	LAR
72	0	female	4.16	0	0	0	0.125	0	0	0.125	0.125	0.125	EVN
67	9	male	0.27	0	0	0	0	0	0	0	0	0	LDA
87	18	female	3.99	1.38	0	0	0	0	0	0	0	0	LDA
71	13	female	26.62	2.38	0.625	0.3	0.416667	0	0.925	0.416667	0.741667	1.01451	LAR
57	16	female	5.28	1.38	0	0	0	0	0	0	0	0	LDA
49	2	female	7.18	0.13	0.125	0.2	0.375	0	0.325	0.375	0.3	0.496236	LAR
54	17	female	2.63	0.13	0	0	0	0	0	0	0	0	LDA
51	4	female	6.95	0	0.25	0	0.125	0	0.25	0.125	0.375	0.279508	LAR
66	22	male	16.35	0	0	0.4	0	0	0.4	0	-0.4	0.4	SML
54	3	male	1.02	0	0	0	0	0	0	0	0	0	LDA
64	2	male	0.98	0	0	0	0	0	0	0	0	0	LDA
56	15	female	8.13	0.5	0.125	0.05	0	0	0.175	0	0.075	0.175	EVN
66	21	female	7.45	0.5	0	0	0	0	0	0	0	0	LDA
62	44	female	2.22	0.25	0	0	0	0	0	0	0	0	LDA
57	3	female	16.71	0.75	0	0.4	0	0	0.4	0	-0.4	0.4	SML
55	2	female	4.18	0.38	0	0	0	0	0	0	0	0	LDA
84	3	male	4.23	2	0	0	0	0	0	0	0	0	LDA
58	6	female	0.74	0	0	0	0	0	0	0	0	0	LDA
67	2	female	0.53	0	0	0	0	0	0	0	0	0	LDA
50	2	female	0.03	0	0	0	0	0	0	0	0	0	LDA
80	2	female	18.42	0.25	0.625	0	0	0	0.625	0	0.625	0.625	LAR
67	2	female	7.24	0	0.25	0.1	0	0	0.35	0	0.15	0.35	EVN
62	39	female	14.62	2.75	0.375	0	0.25	0	0.375	0.25	0.625	0.450694	LAR
46	29	female	27.35	1.13	0.5	0.5	0.625	0.7	1	1.325	-0.075	1.66001	EVN
50	2	female	11.19	0.25	0	0.2	0	0	0.2	0	-0.2	0.2	SML
37	2	female	2.53	0	0.125	0	0	0	0.125	0	0.125	0.125	EVN
46	2	female	3.25	0.38	0	0	0	0	0	0	0	0	LDA
50	2	female	0.29	0	0	0	0	0	0	0	0	0	LDA
66	12	female	10.48	0	0.125	0.2	0.291667	0.2	0.325	0.491667	0.0166667	0.589373	EVN
75	1	female	2.6	0.75	0	0	0	0	0	0	0	0	LDA
55	2	female	1.43	0	0	0	0	0	0	0	0	0	LDA
62	5	female	1.47	0.38	0	0	0	0	0	0	0	0	LDA
66	19	female	8.48	2	0	0	0.291667	0	0	0.291667	0.291667	0.291667	LAR
62	2	female	3.05	0	0	0	0	0	0	0	0	0	LDA
62	12	female	11.05	0.13	0.625	0	0	0	0.625	0	0.625	0.625	LAR
70	9	female	8.09	0.25	0.25	0.15	0	0	0.4	0	0.1	0.4	EVN
40	4	female	1.72	0	0	0.05	0	0	0.05	0	-0.05	0.05	LDA
39	2	female	3.92	0	0	0	0	0	0	0	0	0	LDA
27	2	female	13.9	0.13	0.5	0.1	0	0.6	0.6	0.6	-0.2	0.848528	SML
45	2	female	5.82	0	0	0	0	0	0	0	0	0	LDA
54	2	female	3.56	0.13	0	0	0	0	0	0	0	0	LDA
60	2	male	1.29	0	0	0	0	0	0	0	0	0	LDA
67	21	male	4.17	0	0.125	0	0	0	0.125	0	0.125	0.125	EVN
38	18	female	2.93	0	0	0	0	0	0	0	0	0	LDA
71	39	female	13.35	2.38	0.25	0	0.125	0	0.25	0.125	0.375	0.279508	LAR
73	3	male	1.96	0	0	0	0	0	0	0	0	0	LDA
71	2	male	4.66	0.13	0	0.05	0	0.2	0.05	0.2	-0.25	0.206155	SML
33	2	female	21.48	1.5	0.625	0.15	0	0.1	0.775	0.1	0.375	0.781425	LAR
68	13	female	1.46	0.5	0	0	0	0	0	0	0	0	LDA
57	2	female	0.9	0	0	0	0	0	0	0	0	0	LDA
79	23	female	22	3	0.375	0.15	0.25	0.5	0.525	0.75	-0.025	0.915492	EVN
72	3	female	5.99	0.63	0.125	0	0	0	0.125	0	0.125	0.125	EVN
71	7	female	3.04	0.38	0	0	0	0	0	0	0	0	LDA
47	7	female	0.39	0.13	0	0	0	0	0	0	0	0	LDA
49	2	female	1.99	0.13	0	0	0	0	0	0	0	0	LDA
67	2	female	0.75	0	0	0	0	0	0	0	0	0	LDA
70	2	male	5.13	0	0	0	0	0	0	0	0	0	LDA
54	34	female	3.8	0.5	0	0.05	0	0	0.05	0	-0.05	0.05	LDA
43	2	female	24.49	0	0.25	0.65	0.333333	2	0.9	2.33333	-2.06667	2.50089	SML
59	16	male	1.83	0	0	0	0	0.5	0	0.5	-0.5	0.5	SML
71	13	female	2.24	0	0	0	0	0	0	0	0	0	LDA
59	2	male	17.47	1.25	0.25	0.4	0	0.3	0.65	0.3	-0.45	0.715891	SML
80	21	female	3.29	1.5	0	0	0	0	0	0	0	0	LDA
39	2	female	0.45	0	0	0	0	0	0	0	0	0	LDA
90	2	female	9.13	1.75	0.25	0	0	0	0.25	0	0.25	0.25	LAR
42	2	female	9.33	0	0	0.35	0	0	0.35	0	-0.35	0.35	SML
55	22	female	11.48	0.75	0.125	0.05	0	0	0.175	0	0.075	0.175	EVN
76	1	female	2.58	0.25	0	0	0	0	0	0	0	0	LDA
67	13	female	2.59	0.25	0	0	0	0	0	0	0	0	LDA
53	7	male	0.31	0	0	0	0	0	0	0	0	0	LDA
61	28	female	14.13	0	0.25	0.3	0	0	0.55	0	-0.05	0.55	EVN
63	40	female	9.73	0.38	0.125	0.1	0	0	0.225	0	0.025	0.225	EVN
52	2	female	1	0	0	0	0	0	0	0	0	0	LDA
41	11	female	0.65	0	0	0	0	0	0	0	0	0	LDA
63	2	male	1.48	0.13	0	0	0	0	0	0	0	0	LDA
61	1	female	2.67	0.25	0	0	0	0	0	0	0	0	LDA
77	20	female	7.12	0.38	0.25	0	0	0	0.25	0	0.25	0.25	LAR
64	2	female	2.39	0	0	0	0	0	0	0	0	0	LDA
69	18	female	1	0	0	0	0	0	0	0	0	0	LDA
62	2	female	0.78	0	0	0	0	0	0	0	0	0	LDA
51	7	female	0.57	0	0	0	0	0	0	0	0	0	LDA
73	4	male	8.02	0	0	0.1	0	0	0.1	0	-0.1	0.1	EVN
62	39	female	14.34	0.88	0.5	0	0.125	0	0.5	0.125	0.625	0.515388	LAR
72	11	female	4.77	1.63	0	0	0	0	0	0	0	0	LDA
66	2	female	5.84	0.13	0	0.2	0.125	0	0.2	0.125	-0.075	0.23585	EVN
85	6	female	9.22	2.25	0.125	0	0.25	0	0.125	0.25	0.375	0.279508	LAR
71	16	female	19.35	1.63	0.5	0	0.25	0	0.5	0.25	0.75	0.559017	LAR
51	2	male	1.35	0.25	0	0	0	0	0	0	0	0	LDA
60	6	male	0.42	0	0	0	0	0	0	0	0	0	LDA
51	2	female	1.7	0	0	0	0	0	0	0	0	0	LDA
67	4	female	25.79	1.63	0.5	0.2	0.708333	1	0.7	1.70833	0.00833334	1.84619	EVN
69	6	female	3.83	0.38	0	0.05	0	0	0.05	0	-0.05	0.05	LDA
70	1	female	3.81	0	0	0.05	0	0	0.05	0	-0.05	0.05	LDA
45	1	female	2.07	0	0	0	0	0	0	0	0	0	LDA
79	13	female	29.85	1.38	0.625	0.1	0.25	0	0.725	0.25	0.775	0.766893	LAR
52	1	female	3.05	0.88	0	0	0	0	0	0	0	0	LDA
77	2	male	1.73	0	0	0	0.291667	0	0	0.291667	0.291667	0.291667	LAR
56	2	female	6.08	0.38	0	0.15	0.125	0	0.15	0.125	-0.025	0.195256	EVN
76	9	female	3.86	0	0.125	0	0.166667	0.1	0.125	0.266667	0.191667	0.29451	EVN
70	2	female	1.63	0	0	0	0	0	0	0	0	0	LDA
60	8	female	1.52	0	0	0	0	0	0	0	0	0	LDA
62	2	male	4.11	0	0	0.05	0	0	0.05	0	-0.05	0.05	LDA
30	2	female	13.81	0.13	0.25	0.4	0.25	0	0.65	0.25	0.1	0.696419	EVN
64	1	female	3.26	0.63	0	0	0	0	0	0	0	0	LDA
43	1	female	2.24	0.25	0	0	0	0	0	0	0	0	LDA
54	9	female	14.38	0.88	0.25	0.2	0	0	0.45	0	0.05	0.45	EVN
70	1	female	4.9	0	0	0.1	0	0	0.1	0	-0.1	0.1	EVN
60	1	female	3	0	0.125	0	0	0	0.125	0	0.125	0.125	EVN
75	2	male	4.55	0	0	0	0	0	0	0	0	0	LDA
57	1	female	0.07	0	0	0	0	0	0	0	0	0	LDA
63	2	male	11.74	0	0	0.25	0	0	0.25	0	-0.25	0.25	SML
47	1	female	1.46	0.13	0	0	0	0	0	0	0	0	LDA
67	4	female	1.57	0	0	0	0	0	0	0	0	0	LDA
69	20	female	12.58	1.5	0.75	0.05	0.291667	0	0.8	0.291667	0.991667	0.85151	LAR
54	6	male	18.1	1.63	0.5	0	0.125	0	0.5	0.125	0.625	0.515388	LAR
88	1	female	29.18	1.13	0.5	0.2	0.333333	0	0.7	0.333333	0.633333	0.775314	LAR
25	2	female	24.33	0.13	0.375	0.6	0.416667	0	0.975	0.416667	0.191667	1.0603	EVN
46	6	female	4.83	0	0	0	0	0	0	0	0	0	LDA
57	4	male	23.18	0.88	0.25	0.8	0	0	1.05	0	-0.55	1.05	SML
64	1	male	6.45	0.13	0.125	0	0	0	0.125	0	0.125	0.125	EVN
75	1	female	0.75	0	0	0	0	0	0	0	0	0	LDA
66	1	male	3.14	0.13	0	0	0	0	0	0	0	0	LDA
49	21	female	4.02	0.38	0.125	0	0	0	0.125	0	0.125	0.125	EVN
66	2	female	2.39	0	0.125	0	0	0	0.125	0	0.125	0.125	EVN
58	20	female	2.58	0.13	0	0	0.125	0	0	0.125	0.125	0.125	EVN
56	7	female	2.24	0	0.125	0	0	0	0.125	0	0.125	0.125	EVN
66	23	female	3.07	0.25	0	0.05	0	0	0.05	0	-0.05	0.05	LDA
69	2	female	15.42	0.13	0.375	0.05	0.125	0	0.425	0.125	0.45	0.443001	LAR
31	9	female	24.73	0.13	0.625	0.7	0	0	1.325	0	-0.075	1.325	EVN
83	17	female	7.22	1.25	0	0	0	0	0	0	0	0	LDA
69	8	female	6.62	0.75	0	0	0.125	0	0	0.125	0.125	0.125	EVN
53	1	female	10.18	1.5	0	0	0.375	1	0	1.375	-0.625	1.375	SML
63	1	female	7.75	0.5	0	0.1	0	0	0.1	0	-0.1	0.1	EVN
33	1	female	9.63	0	0	0	0.25	0	0	0.25	0.25	0.25	LAR
48	3	female	2.46	0	0	0.1	0	0	0.1	0	-0.1	0.1	EVN
58	1	female	4.29	0	0.25	0	0	0	0.25	0	0.25	0.25	LAR
68	1	female	1.72	0.88	0	0	0	0	0	0	0	0	LDA
73	12	female	8.95	0.5	0.125	0	0	0	0.125	0	0.125	0.125	EVN
81	1	female	5.63	2	0	0	0	0	0	0	0	0	LDA
91	41	female	8.28	1.75	0	0	0.125	0	0	0.125	0.125	0.125	EVN
54	1	female	11.58	0.88	0	0.15	0	1	0.15	1	-1.15	1.01119	SML
65	1	female	0.55	0	0	0	0	0	0	0	0	0	LDA
47	3	female	60.45	2.25	0.25	1.9	1.16667	2	2.15	3.16667	-2.48333	3.82757	SML
55	10	female	2.33	0.25	0	0	0	0	0	0	0	0	LDA
41	2	female	14.78	1.13	0.125	0.15	0.25	0	0.275	0.25	0.225	0.371652	LAR
66	7	female	2.37	0.13	0	0	0	0	0	0	0	0	LDA
[truncated: 9,014 more rows]

## Sheet: serial registration 2013-2014
Age (yrs)	Disease duration (yrs)	Sex	2013_MTX (0: non-user, 1: user)	2014_MTX (0: non-user, 1: user)	2013_bDMARDｓ (0: non-user, 1: user)	2014_bDMARDs (0: non-user, 1: user)	2013_X	2013_Y	2013_Z	2013_|Vxy|	2013_group	2014_X	2014_Y	2014_Z	2014_|Vxy|	2014_group
86	73	female	0	0	0	0	0	0.142857	0.142857	0.142857	EVN	0	0	0	0	LDA
76	29	female	1	1	0	0	0	0	0	0	LDA	0	0	0	0	LDA
58	27	male	1	1	0	0	0	0	0	0	LDA	0	0	0	0	LDA
72	0	female	1	1	0	0	0.1	0	-0.1	0.1	EVN	0.2	0	-0.2	0.2	SML
73	24	male	1	1	0	0	0.125	0	0.125	0.125	EVN	0	0	0	0	LDA
89	30	female	0	0	1	1	0	0	0	0	LDA	0	0	0	0	LDA
91	9	female	0	0	0	0	0	0	0	0	LDA	0	0	0	0	LDA
61	11	male	1	0	0	0	0	0	0	0	LDA	0	0	0	0	LDA
70	25	female	0	0	0	0	0.125	0	0.125	0.125	EVN	0	0	0	0	LDA
77	7	male	0	0	0	0	0	0	0	0	LDA	0	0.125	0.125	0.125	EVN
57	14	female	0	0	1	1	0.125	0	0.125	0.125	EVN	0	0	0	0	LDA
93	14	male	0	0	0	0	0	0	0	0	LDA	0	0	0	0	LDA
73	12	female	1	1	0	0	0.575	0	-0.325	0.575	SML	0.225	0.125	0.15	0.257391	EVN
64	6	female	0	0	0	0	0	0	0	0	LDA	0	0	0	0	LDA
67	26	male	1	1	0	0	0	0	0	0	LDA	0	0.291667	0.291667	0.291667	LAR
49	9	female	0	0	1	1	0	0	0	0	LDA	0	0	0	0	LDA
27	24	female	0	0	1	1	0	0	0	0	LDA	0	0	0	0	LDA
73	21	female	1	1	1	1	0	0	0	0	LDA	0.125	0	0.125	0.125	EVN
75	8	female	1	1	0	0	0.15	0.6	-0.75	0.618466	SML	0.05	0.725	-0.525	0.726722	SML
63	10	female	0	0	0	0	0.05	0	-0.05	0.05	LDA	0	0	0	0	LDA
93	13	female	0	0	0	0	0	0	0	0	LDA	0	0	0	0	LDA
66	15	female	1	1	0	0	0	0	0	0	LDA	0	0	0	0	LDA
74	31	female	1	1	0	0	0	0	0	0	LDA	0.175	0	0.075	0.175	EVN
40	13	female	1	1	1	1	0.525	0.866667	-0.308333	1.01328	SML	0	0	0	0	LDA
66	20	female	1	1	0	0	0.325	0	-0.075	0.325	EVN	0.225	0	0.025	0.225	EVN
77	11	female	1	1	0	0	0	0	0	0	LDA	0.25	0	0.25	0.25	LAR
48	15	female	1	1	1	1	0	0	0	0	LDA	0	0	0	0	LDA
66	10	male	1	1	0	0	0	0	0	0	LDA	0.125	0	0.125	0.125	EVN
85	13	female	0	0	0	0	0.3	0	0.2	0.3	EVN	0.05	0	-0.05	0.05	LDA
39	13	female	1	1	0	0	0.325	0	-0.075	0.325	EVN	0.35	0	0.15	0.35	EVN
58	9	female	1	1	1	1	0	0	0	0	LDA	0	0	0	0	LDA
63	28	female	1	1	0	0	0.375	0.458333	0.833333	0.592195	LAR	0	0	0	0	LDA
68	11	female	1	1	0	0	0.525	0.25	0.475	0.581485	LAR	0	0	0	0	LDA
60	31	female	1	1	0	0	0.375	0	0.375	0.375	LAR	0	0	0	0	LDA
70	9	female	1	1	0	0	0	0	0	0	LDA	0.125	0	0.125	0.125	EVN
77	9	female	1	1	0	0	0	0	0	0	LDA	0	0	0	0	LDA
73	13	female	0	0	0	0	0.725	0	0.025	0.725	EVN	0.4	0	0.1	0.4	EVN
70	16	female	1	1	0	0	0	0	0	0	LDA	0.3	0.25	0.45	0.390512	LAR
88	11	female	0	0	1	1	0.05	0	-0.05	0.05	LDA	0.15	0	-0.15	0.15	EVN
58	33	female	0	0	0	0	0.2	0	-0.2	0.2	SML	0.5	1	-1.5	1.11803	SML
70	35	female	1	1	0	0	0	0	0	0	LDA	0.125	0	0.125	0.125	EVN
77	14	female	1	1	0	0	0	0	0	0	LDA	0	0	0	0	LDA
60	33	female	1	1	0	0	1.025	0.591667	-0.283333	1.18351	SML	1	0	0	1	EVN
50	19	female	0	0	0	0	0	0	0	0	LDA	0	0	0	0	LDA
59	13	female	1	1	0	0	0.45	0	-0.45	0.45	SML	1.025	0	-0.775	1.025	SML
60	26	female	1	1	0	0	0	0	0	0	LDA	0	0	0	0	LDA
62	9	female	1	1	0	0	0	0	0	0	LDA	0	0	0	0	LDA
67	18	female	0	0	0	0	0.15	0	-0.15	0.15	EVN	0	0	0	0	LDA
50	18	female	1	1	1	1	0	0	0	0	LDA	0	0	0	0	LDA
75	31	female	0	0	0	0	0.05	0	-0.05	0.05	LDA	0.225	0	0.025	0.225	EVN
61	14	male	0	0	0	0	0	0	0	0	LDA	0	0	0	0	LDA
75	14	female	0	0	0	0	0	0	0	0	LDA	0	0	0	0	LDA
77	33	female	1	1	0	0	0.125	0.125	0.25	0.176777	LAR	0	0	0	0	LDA
47	8	female	1	1	1	1	0	0	0	0	LDA	0	0	0	0	LDA
62	2	male	1	1	0	0	0	0	0	0	LDA	0	0	0	0	LDA
70	30	female	1	1	0	0	0	0	0	0	LDA	0	0.125	0.125	0.125	EVN
64	16	female	1	1	0	1	0.45	0	0.05	0.45	EVN	0.15	0	-0.15	0.15	EVN
72	9	female	1	1	0	0	0	0	0	0	LDA	0.2	0	-0.2	0.2	SML
63	25	female	1	1	0	0	0	0	0	0	LDA	0.4	0	-0.4	0.4	SML
54	11	female	1	1	0	0	0.65	0	-0.15	0.65	EVN	0.45	0	-0.45	0.45	SML
79	8	male	1	1	1	1	0.5	0	-0.5	0.5	SML	0	0	0	0	LDA
67	6	female	1	1	0	0	0	0.225	0.025	0.225	EVN	0	0.291667	0.291667	0.291667	LAR
66	4	female	1	1	0	0	0	0	0	0	LDA	0.25	0	0.25	0.25	LAR
79	7	female	1	0	1	1	0.2	0.733333	-0.266667	0.760117	SML	0	0	0	0	LDA
65	6	male	1	1	0	0	0	0	0	0	LDA	0	0	0	0	LDA
78	6	female	1	1	0	0	0	0	0	0	LDA	0	0	0	0	LDA
80	6	female	1	1	0	0	0	0	0	0	LDA	0	0	0	0	LDA
80	6	female	1	1	0	0	0	0	0	0	LDA	0.425	0	-0.175	0.425	EVN
66	5	female	1	1	0	0	0	0	0	0	LDA	0.275	0	-0.025	0.275	EVN
87	5	female	0	0	0	0	0	0	0	0	LDA	0	0	0	0	LDA
72	43	male	1	1	0	0	0.15	0	-0.15	0.15	EVN	0	0	0	0	LDA
89	11	female	0	0	0	0	0.1	0.25	0.15	0.269258	EVN	0.1	0	-0.1	0.1	EVN
64	1	male	0	0	0	0	0.55	0	0.45	0.55	LAR	0.1	0	-0.1	0.1	EVN
78	4	female	0	0	0	0	0.625	0.25	0.875	0.673146	LAR	0.5	0.125	0.625	0.515388	LAR
61	8	female	0	0	0	0	0	0	0	0	LDA	0	0	0	0	LDA
47	3	female	1	1	0	1	0.625	0	0.625	0.625	LAR	0.925	0	0.825	0.925	LAR
65	4	male	1	1	1	1	0	0	0	0	LDA	0.125	0	0.125	0.125	EVN
76	8	female	1	1	0	0	0.125	0.125	0.25	0.176777	LAR	0	0	0	0	LDA
66	4	female	1	1	0	0	0.2	0	-0.2	0.2	SML	0.05	0	-0.05	0.05	LDA
60	2	female	1	1	0	0	0.3	0.7	-1	0.761577	SML	0	0	0	0	LDA
52	3	female	1	1	0	1	0	0	0	0	LDA	0	0	0	0	LDA
45	1	male	1	1	0	0	0	0	0	0	LDA	0	0	0	0	LDA
81	1	male	1	1	0	0	0.35	0	0.15	0.35	EVN	0	0	0	0	LDA
68	13	male	1	1	1	0	0	0	0	0	LDA	0.325	0	-0.075	0.325	EVN
80	0	female	0	0	0	0	0	0.25	0.25	0.25	LAR	0	0.25	0.25	0.25	LAR
83	5	male	0	0	0	0	0	0	0	0	LDA	0.725	0	0.025	0.725	EVN
63	6	female	0	0	0	0	0	0	0	0	LDA	0	0	0	0	LDA
64	6	female	0	0	0	0	0.125	0	0.125	0.125	EVN	0	0	0	0	LDA
45	17	female	1	1	1	1	0	0	0	0	LDA	0	0	0	0	LDA
58	20	female	1	1	0	0	0	0.125	0.125	0.125	EVN	0	0	0	0	LDA
66	23	female	1	1	0	0	0.05	0.708333	0.658333	0.710096	LAR	0.05	0.708333	0.658333	0.710096	LAR
77	20	female	0	0	0	0	0	0.25	0.25	0.25	LAR	0	0	0	0	LDA
69	21	female	1	1	0	0	0.333333	0.166667	0.5	0.372678	LAR	0.55	0.125	0.575	0.564026	LAR
75	23	female	0	0	1	1	0.125	0	0.125	0.125	EVN	0.25	0	0.25	0.25	LAR
66	38	female	1	1	0	0	0	0.333333	0.333333	0.333333	LAR	0.15	0.125	-0.025	0.195256	EVN
79	38	female	0	0	0	0	0	0	0	0	LDA	0	0	0	0	LDA
56	24	female	1	1	1	1	0.575	0	0.175	0.575	EVN	0.675	0	0.075	0.675	EVN
72	24	female	0	0	0	0	0.15	0	-0.15	0.15	EVN	1.1	0.583333	0.483333	1.2451	LAR
60	27	female	0	0	0	0	0.05	0.125	0.075	0.134629	EVN	0	0	0	0	LDA
68	21	female	0	0	1	1	0	0	0	0	LDA	0.05	0.125	0.075	0.134629	EVN
72	25	female	1	1	1	1	1	1	-1	1.41421	SML	1.3	1.375	-0.425	1.89225	SML
58	21	female	1	0	0	0	0.175	0.333333	0.408333	0.376479	LAR	1.15	0.25	1.1	1.17686	LAR
47	21	female	1	1	0	0	0.6	0	0.4	0.6	LAR	0.4	0	0.1	0.4	EVN
62	21	female	1	1	1	1	0.9	0.35	0.25	0.96566	LAR	1.05	0.416667	0.866667	1.12965	LAR
84	1	female	0	0	0	0	0	0.291667	0.291667	0.291667	LAR	0	0.291667	0.291667	0.291667	LAR
61	21	female	1	1	0	0	0	0	0	0	LDA	0	1.125	-0.875	1.125	SML
63	27	female	1	1	0	0	1.1	1	-0.6	1.48661	SML	1.35	1	-0.85	1.68003	SML
63	3	male	1	1	0	0	0.125	0	0.125	0.125	EVN	0.125	0	0.125	0.125	EVN
66	23	female	1	1	0	0	0.25	0.225	0.275	0.336341	LAR	0	0	0	0	LDA
63	22	female	1	1	1	0	1	0	-1.49012e-08	1	EVN	0.7	0	-0.2	0.7	SML
59	32	female	1	0	0	0	0	0.125	0.125	0.125	EVN	0	0.25	0.25	0.25	LAR
55	20	male	1	1	0	0	0	0	0	0	LDA	0	0	0	0	LDA
84	34	female	1	1	0	0	0.125	0	0.125	0.125	EVN	0.125	0	0.125	0.125	EVN
67	9	female	0	0	0	0	0	0	0	0	LDA	0	0	0	0	LDA
67	25	male	1	1	0	0	0	0.125	0.125	0.125	EVN	0	0.125	0.125	0.125	EVN
65	35	male	1	1	0	0	0	0	0	0	LDA	1	0.25	0.75	1.03078	LAR
64	36	female	0	0	0	0	1.6	0.452381	0.352381	1.66272	LAR	2.575	0.541667	-0.283333	2.63135	SML
75	12	female	1	1	0	0	0.8	0	-0.8	0.8	SML	0	0	0	0	LDA
67	46	female	1	1	0	0	1	0.291667	-0.208333	1.04167	SML	1.1	0.291667	-0.308333	1.13801	SML
70	19	female	1	1	1	1	0.1	0.5	-0.6	0.509902	SML	0.1	0.5	-0.6	0.509902	SML
77	31	female	1	0	0	0	0	0	0	0	LDA	0	0	0	0	LDA
75	19	male	0	0	0	0	0.45	1	-1.45	1.09659	SML	0.65	0	-0.15	0.65	EVN
53	6	female	1	1	0	0	0.75	1.5	-0.25	1.67705	SML	0.85	1.5	-0.35	1.72409	SML
58	2	female	1	1	0	0	0.05	0	-0.05	0.05	LDA	0.05	0	-0.05	0.05	LDA
65	12	female	1	1	0	0	0.1	0	-0.1	0.1	EVN	0.1	0	-0.1	0.1	EVN
37	2	female	0	0	0	0	0	0	0	0	LDA	0.125	0	0.125	0.125	EVN
44	0	male	1	1	0	0	0.35	1	-0.85	1.05948	SML	0.5	0	0.5	0.5	LAR
53	2	male	1	1	0	0	0.55	0.2	-0.25	0.585235	SML	0.55	0.2	-0.25	0.585235	SML
62	2	male	1	1	0	0	0	0	0	0	LDA	0	0	0	0	LDA
66	39	female	0	0	0	0	0	0.5	0.5	0.5	LAR	0	0	0	0	LDA
75	5	male	1	1	0	0	0.3	0	0.2	0.3	EVN	1.075	0.125	-0.2	1.08224	SML
52	5	female	1	1	0	0	0	0.291667	0.291667	0.291667	LAR	0	0.291667	0.291667	0.291667	LAR
59	2	male	0	0	0	0	0	0	0	0	LDA	0	0	0	0	LDA
74	2	female	1	1	0	0	0	0	0	0	LDA	0	0	0	0	LDA
63	1	female	1	1	0	0	0	0	0	0	LDA	0	0	0	0	LDA
77	1	female	0	0	0	0	0.925	1.20833	0.0333333	1.52174	EVN	0.3	0.291667	-0.00833334	0.418413	EVN
40	3	female	1	1	0	0	0	0	0	0	LDA	0	0	0	0	LDA
52	18	female	1	1	0	0	0	0	0	0	LDA	0.2	1.25	-0.95	1.2659	SML
46	4	male	1	0	1	1	0.175	1.125	-0.8	1.13853	SML	0.6	1	-1.1	1.16619	SML
62	2	male	0	0	0	0	0	0	0	0	LDA	0	0	0	0	LDA
63	5	male	1	1	0	0	0	0	0	0	LDA	0	0	0	0	LDA
82	31	female	0	0	0	0	0.95	0.416667	0.966667	1.03736	LAR	1.575	0.416667	0.591667	1.62918	LAR
47	1	female	1	1	0	0	0	0	0	0	LDA	0	0	0	0	LDA
60	1	male	0	0	0	0	0	0	0	0	LDA	0	0	0	0	LDA
76	42	male	0	0	0	0	0	0.291667	0.291667	0.291667	LAR	0.125	0.125	0.25	0.176777	LAR
85	1	female	0	0	0	0	0	0	0	0	LDA	0	0	0	0	LDA
58	1	female	1	1	1	1	0	0.125	0.125	0.125	EVN	0	0.125	0.125	0.125	EVN
61	9	female	1	0	0	0	0	0	0	0	LDA	0	0	0	0	LDA
67	2	female	1	1	0	0	0	0	0	0	LDA	0	0	0	0	LDA
76	0	female	1	0	1	0	0.7	0.25	0.55	0.743303	LAR	0	0	0	0	LDA
61	10	female	1	1	0	0	0	0	0	0	LDA	0	0	0	0	LDA
79	8	male	0	0	0	0	0	0	0	0	LDA	0	0.125	0.125	0.125	EVN
63	0	male	1	1	0	0	0.25	0	0.25	0.25	LAR	0	0	0	0	LDA
60	0	female	0	0	0	0	0	0	0	0	LDA	0	0.125	0.125	0.125	EVN
77	0	female	1	1	0	1	0.7	0	0.3	0.7	LAR	1.3	0.125	0.325	1.306	LAR
76	30	female	0	0	0	0	1.2	0.142857	0.442857	1.20847	LAR	1.1	0	0.4	1.1	LAR
69	3	female	1	1	0	0	0.575	0	0.175	0.575	EVN	0.25	0	0.25	0.25	LAR
65	0	female	0	0	0	0	1	0	0.5	1	LAR	0.225	0	0.025	0.225	EVN
71	21	female	1	1	0	0	1.575	1	-0.325	1.86564	SML	0.1	0.125	0.025	0.160078	EVN
60	0	male	0	1	0	0	0.125	0	0.125	0.125	EVN	0.25	0	0.25	0.25	LAR
74	33	female	1	1	0	1	0.825	1.25	-0.325	1.49771	SML	0	0	0	0	LDA
34	1	female	1	1	0	0	1.075	1.5	-0.825	1.84543	SML	0	0	0	0	LDA
67	0	female	0	0	0	0	0.575	0.25	-0.075	0.626997	EVN	0.725	0.583333	0.108333	0.930539	EVN
69	16	male	1	1	0	0	0.25	0.5	0.75	0.559017	LAR	0.125	0	0.125	0.125	EVN
77	40	female	0	0	0	0	0	0	0	0	LDA	0	0	0	0	LDA
75	12	female	1	1	0	0	0	0	0	0	LDA	0.125	0.25	0.375	0.279508	LAR
77	5	female	1	1	0	0	0	0	0	0	LDA	0.125	0	0.125	0.125	EVN
65	10	female	1	1	0	0	0	0.125	0.125	0.125	EVN	0	0.375	0.375	0.375	LAR
59	11	female	1	1	1	1	0.125	0.125	0.25	0.176777	LAR	0.125	0.25	0.375	0.279508	LAR
75	25	female	1	1	0	0	0.2	0	-0.2	0.2	SML	0.05	0	-0.05	0.05	LDA
68	21	female	1	1	0	0	0.775	0	-0.025	0.775	EVN	0.675	1	-0.925	1.20649	SML
79	18	female	0	0	0	0	0.95	0.616667	-0.233333	1.1326	SML	0.25	0.166667	0.416667	0.300463	LAR
64	3	female	1	1	0	0	0	0	0	0	LDA	0	0.25	0.25	0.25	LAR
63	42	female	1	1	0	0	0.1	0.5	-0.6	0.509902	SML	0.1	0.791667	-0.308333	0.797957	SML
90	14	female	1	1	0	0	1.15	0	-0.65	1.15	SML	0.8	0.45	-0.25	0.917878	SML
63	18	female	1	1	1	1	0.85	0	0.15	0.85	EVN	0.475	0.125	0.4	0.491172	LAR
74	18	female	1	1	0	0	0	0	0	0	LDA	0	0	0	0	LDA
46	22	male	1	1	0	0	0	0.375	0.375	0.375	LAR	0.15	0	-0.15	0.15	EVN
78	18	female	0	0	0	0	0	0	0	0	LDA	0	0	0	0	LDA
70	18	male	0	0	0	0	0.35	0	-0.35	0.35	SML	0.35	0	-0.35	0.35	SML
87	22	female	0	0	0	0	0.25	1.5	-0.25	1.52069	SML	0.5	1.5	0	1.58114	EVN
66	31	female	1	1	0	0	1.3	0.583333	1.28333	1.42488	LAR	0.875	0.583333	1.45833	1.05162	LAR
65	34	female	1	1	0	0	0	0.333333	0.333333	0.333333	LAR	0.05	0.291667	0.241667	0.295921	LAR
76	32	female	1	1	1	1	0.3	0.333333	0.533333	0.448454	LAR	0.3	1.25	-0.55	1.2855	SML
71	17	male	0	0	0	0	0.05	0	-0.05	0.05	LDA	0	0	0	0	LDA
78	13	female	1	1	0	0	0.125	0	0.125	0.125	EVN	1	0.291667	0.791667	1.04167	LAR
63	1	female	1	1	0	0	0.4	0	-0.4	0.4	SML	0.25	0	-0.25	0.25	SML
50	19	female	1	1	0	0	0.1	0.325	-0.175	0.340037	EVN	0.05	0	-0.05	0.05	LDA
72	17	female	1	1	1	1	0	0.142857	0.142857	0.142857	EVN	0	0.125	0.125	0.125	EVN
65	21	female	1	1	1	1	0.05	0	-0.05	0.05	LDA	0	0	0	0	LDA
62	9	female	1	1	0	0	0.05	0	-0.05	0.05	LDA	0.05	0	-0.05	0.05	LDA
65	38	female	0	0	0	0	0.9	0.285714	0.385714	0.944263	LAR	1.1	0.25	0.15	1.12805	EVN
61	17	female	0	0	0	0	1.7	1.6	-0.6	2.33452	SML	1.25	0.125	-0.625	1.25623	SML
71	3	female	0	0	0	0	0	0.416667	0.416667	0.416667	LAR	0	0.125	0.125	0.125	EVN
63	4	female	0	0	0	0	0	0	0	0	LDA	0	0	0	0	LDA
86	3	female	0	0	0	0	0	0	0	0	LDA	0.05	0	-0.05	0.05	LDA
62	26	female	1	1	0	0	0.425	1	-1.175	1.08657	SML	0.125	1	-0.875	1.00778	SML
48	17	female	1	1	0	0	0	0	0	0	LDA	0	0	0	0	LDA
39	17	female	0	0	0	0	0.7	0.291667	0.0916667	0.758333	EVN	0.875	0.125	0	0.883883	EVN
63	25	female	1	1	0	0	0.5	0.5	1	0.707107	LAR	0.125	0	0.125	0.125	EVN
76	18	female	1	1	0	0	0.25	0	0.25	0.25	LAR	0.5	0	0.5	0.5	LAR
67	17	female	0	0	0	0	0.425	0	0.325	0.425	LAR	0.425	0	0.325	0.425	LAR
56	36	female	0	0	0	0	0	0	0	0	LDA	0	0	0	0	LDA
64	33	female	1	1	0	0	0.6	1.60833	-0.291667	1.71661	SML	0.75	0.333333	0.0833333	0.820738	EVN
53	21	female	1	1	1	1	0.175	0.666667	-0.258333	0.689253	SML	0.45	0.3	-0.25	0.540833	SML
66	13	female	0	0	0	0	1.5	1.56667	-0.433333	2.16897	SML	0.875	0.166667	0.0416667	0.890732	EVN
68	16	female	0	0	0	0	0	0.2	-0.2	0.2	SML	0.05	0.2	-0.25	0.206155	SML
56	5	female	1	1	0	0	0.1	0.2	-0.3	0.223607	SML	0.1	0.2	-0.3	0.223607	SML
64	14	female	1	0	0	0	0.1	0	-0.1	0.1	EVN	0.1	0	-0.1	0.1	EVN
67	3	female	1	1	0	0	0.1	0	-0.1	0.1	EVN	0	0	0	0	LDA
72	19	male	1	0	0	0	1.075	0	-0.825	1.075	SML	0	0	0	0	LDA
54	20	female	0	0	0	0	0	0	0	0	LDA	0	0	0	0	LDA
42	22	female	1	1	0	0	2.2	1.90476	-0.795238	2.91	SML	2.3	1.83333	-0.966667	2.94128	SML
72	15	female	1	1	0	0	0.25	0.125	-0.125	0.279509	EVN	0.175	0.125	0.2	0.215058	EVN
61	16	female	1	1	0	0	0	0.25	0.25	0.25	LAR	0	0	0	0	LDA
77	9	male	1	1	0	0	0	0	0	0	LDA	0.05	0	-0.05	0.05	LDA
78	32	female	0	0	0	0	0.05	0.142857	0.0928571	0.151354	EVN	0.1	0.125	0.025	0.160078	EVN
66	14	female	1	1	0	0	0	0	0	0	LDA	0	0	0	0	LDA
81	24	female	0	0	0	0	0.925	0.375	0.2	0.998123	EVN	1.275	0.375	-0.15	1.329	EVN
70	15	male	1	1	0	0	0.7	0.2	0.1	0.728011	EVN	1.25	0	-0.25	1.25	SML
67	15	female	1	1	1	1	0.125	0	0.125	0.125	EVN	0	0	0	0	LDA
75	32	female	1	1	0	0	0.2	0	-0.2	0.2	SML	0	0	0	0	LDA
83	14	female	0	0	0	0	0.25	0	0.25	0.25	LAR	0.75	0.25	1	0.790569	LAR
59	0	male	0	1	0	0	0.1	0.525	-0.375	0.534439	SML	0	0	0	0	LDA
65	22	female	1	1	1	1	0	0.125	0.125	0.125	EVN	0	0	0	0	LDA
83	14	female	1	1	0	0	0	0	0	0	LDA	0	0	0	0	LDA
77	14	female	0	0	0	0	0	0.125	0.125	0.125	EVN	0	0.125	0.125	0.125	EVN
62	32	female	1	1	1	1	0.375	0.1	0.275	0.388104	LAR	0.375	0.1	0.275	0.388104	LAR
69	16	female	0	0	0	0	0	0	0	0	LDA	0	0	0	0	LDA
63	13	female	1	1	1	1	0	0	0	0	LDA	0	0	0	0	LDA
66	13	female	1	1	1	1	0.55	0.25	0.7	0.604152	LAR	0.55	0.35	0.6	0.65192	LAR
56	10	female	1	1	0	0	0.15	0.25	0.1	0.291548	EVN	0.1	0.25	0.15	0.269258	EVN
39	14	female	1	1	0	0	0.35	0	0.15	0.35	EVN	0	0	0	0	LDA
65	13	male	1	1	0	0	0	0	0	0	LDA	0	0	0	0	LDA
78	13	male	0	0	0	0	0	0	0	0	LDA	0.125	0	0.125	0.125	EVN
59	17	male	0	0	1	1	0	0.309524	0.309524	0.309524	LAR	0	0.416667	0.416667	0.416667	LAR
75	19	female	1	1	0	0	0.375	0.452381	0.827381	0.5876	LAR	0.475	0	0.275	0.475	LAR
54	15	female	1	1	0	0	0.7	0	0.3	0.7	LAR	0.6	0.5	0.9	0.781025	LAR
60	13	female	1	1	0	0	0	0	0	0	LDA	0	0	0	0	LDA
76	14	male	1	1	0	0	0.125	0	0.125	0.125	EVN	1.375	0.25	-0.375	1.39754	SML
68	32	female	1	1	1	1	0	0	0	0	LDA	0	0	0	0	LDA
53	13	female	1	1	0	1	0.625	0	0.625	0.625	LAR	0.5	0.166667	0.666667	0.527046	LAR
55	13	female	1	1	1	1	0	0	0	0	LDA	0	0	0	0	LDA
82	14	female	0	0	0	0	0	0	0	0	LDA	0	0	0	0	LDA
70	12	female	0	0	0	0	0	0	0	0	LDA	0	0	0	0	LDA
67	12	female	1	1	0	0	0	0	0	0	LDA	0	0	0	0	LDA
73	20	female	1	1	0	0	0	0	0	0	LDA	0	0	0	0	LDA
54	12	female	1	1	0	0	0.375	0	0.375	0.375	LAR	0.375	0	0.375	0.375	LAR
40	11	female	1	1	0	0	0	0	0	0	LDA	0	0	0	0	LDA
49	11	female	1	1	0	0	0	1	-1	1	SML	0	1	-1	1	SML
50	12	female	1	1	0	0	0.5	0	0.5	0.5	LAR	0.35	0	0.15	0.35	EVN
89	16	female	0	0	0	0	1.45	0.595238	0.145238	1.56742	EVN	1.3	0.25	-0.05	1.32382	EVN
64	6	female	1	1	1	1	0	0.416667	0.416667	0.416667	LAR	0	0.25	0.25	0.25	LAR
65	18	female	1	1	0	0	0	0	0	0	LDA	0	0	0	0	LDA
77	13	female	0	0	0	0	0.25	0.333333	0.583333	0.416667	LAR	0.25	0	0.25	0.25	LAR
40	12	female	1	1	1	1	0.125	0	0.125	0.125	EVN	0	0	0	0	LDA
73	32	female	0	0	0	0	0.1	0.25	0.15	0.269258	EVN	0.6	0.25	0.65	0.65	LAR
64	21	female	1	1	0	0	0.1	0.125	0.025	0.160078	EVN	0.05	0.125	0.075	0.134629	EVN
78	37	female	0	0	0	0	0	0	0	0	LDA	0	0	0	0	LDA
76	12	female	1	1	0	0	0	0	0	0	LDA	0	0	0	0	LDA
73	11	female	1	1	0	0	0	0	0	0	LDA	0	0	0	0	LDA
56	13	female	0	0	0	0	0	0	0	0	LDA	0.125	0.125	0.25	0.176777	LAR
51	13	female	0	0	0	0	0	0	0	0	LDA	0	0	0	0	LDA
61	13	female	0	0	0	0	0.7	1.5	-1.2	1.65529	SML	0.725	0.375	0.4	0.816241	LAR
70	15	female	0	0	0	0	0	0	0	0	LDA	0	0	0	0	LDA
49	1	female	1	1	0	0	0.35	0	0.15	0.35	EVN	0.55	0.25	0.2	0.604152	EVN
65	11	female	0	0	0	0	0	0	0	0	LDA	0	0	0	0	LDA
64	10	female	1	1	0	0	1.05	1.125	-1.925	1.53887	SML	0.5	1	-1.5	1.11803	SML
65	42	female	0	0	0	0	0	1	-1	1	SML	0	1	-1	1	SML
75	5	female	0	0	1	1	1.65	0	-0.65	1.65	SML	1.7	0.375	-0.325	1.74087	SML
77	10	female	1	1	0	0	0.05	0	-0.05	0.05	LDA	0.375	0.125	0	0.395285	EVN
65	10	male	1	1	0	0	0.45	0	-0.45	0.45	SML	0	0	0	0	LDA
49	10	male	1	1	1	1	0.3	0.125	0.325	0.325	LAR	0.35	0.25	0.4	0.430116	LAR
80	5	female	0	0	0	0	0.1	0	-0.1	0.1	EVN	0.65	0	-0.15	0.65	EVN
43	10	female	1	1	0	0	0.25	0	0.25	0.25	LAR	0.25	0	0.25	0.25	LAR
49	10	female	1	1	1	1	0	0.516667	0.316667	0.516667	LAR	0	0.225	0.025	0.225	EVN
70	11	female	0	0	1	1	0.125	0.166667	0.291667	0.208333	LAR	0.175	0.583333	0.658333	0.609018	LAR
65	18	male	1	1	0	0	0	0	0	0	LDA	0	0	0	0	LDA
67	10	male	1	1	0	0	0.5	0	0.5	0.5	LAR	0.25	0	0.25	0.25	LAR
69	10	female	1	1	1	1	0.375	0	0.375	0.375	LAR	0.25	0	0.25	0.25	LAR
59	11	female	1	1	0	0	0.125	0.125	0.25	0.176777	LAR	0.25	0.291667	0.541667	0.384148	LAR
52	8	female	1	1	0	0	0.125	0	0.125	0.125	EVN	0	0	0	0	LDA
60	10	female	1	1	0	0	0	0	0	0	LDA	0	0	0	0	LDA
68	10	male	1	1	0	0	0	0	0	0	LDA	0	0	0	0	LDA
77	9	male	1	0	0	0	0.1	0	-0.1	0.1	EVN	0.25	0.25	0.5	0.353553	LAR
77	13	female	1	0	0	0	0	0.142857	0.142857	0.142857	EVN	0	0.333333	0.333333	0.333333	LAR
78	11	female	1	1	0	0	0.125	0.25	0.375	0.279508	LAR	0.05	0.125	0.075	0.134629	EVN
81	14	female	1	1	0	0	0	0	0	0	LDA	0	0	0	0	LDA
48	16	female	1	1	1	1	0.5	1.25	-1.25	1.34629	SML	0.55	1.25	-1.3	1.36565	SML
58	9	female	0	0	0	0	0	0	0	0	LDA	0	0	0	0	LDA
39	9	male	0	0	0	0	0	0	0	0	LDA	0	0	0	0	LDA
58	9	female	1	1	0	0	0.05	0	-0.05	0.05	LDA	0.05	0.125	0.075	0.134629	EVN
76	11	male	0	0	1	1	0.425	0.458333	0.783333	0.625056	LAR	0.125	0	0.125	0.125	EVN
65	9	female	1	1	1	1	0	0	0	0	LDA	0	0	0	0	LDA
74	11	male	1	1	0	0	0.225	0	0.025	0.225	EVN	0.225	0	0.025	0.225	EVN
80	22	female	1	1	0	0	0	0.125	0.125	0.125	EVN	0	0.125	0.125	0.125	EVN
63	9	male	1	1	1	1	0	0	0	0	LDA	0	0.125	0.125	0.125	EVN
50	8	female	1	1	1	0	0	0	0	0	LDA	0.25	0	-0.25	0.25	SML
64	36	female	0	0	0	0	0.375	0	0.375	0.375	LAR	0.25	0.5	0.75	0.559017	LAR
62	9	male	1	1	0	0	0	0	0	0	LDA	0.65	0	-0.15	0.65	EVN
45	8	female	1	1	0	0	0.35	0	0.15	0.35	EVN	0.35	0.25	0.4	0.430116	LAR
62	12	female	1	1	0	0	0	0	0	0	LDA	0	0	0	0	LDA
67	11	female	1	1	1	1	0	0.125	0.125	0.125	EVN	0	0.25	0.25	0.25	LAR
72	9	female	1	1	0	0	0.25	0	0.25	0.25	LAR	0.125	0.125	0.25	0.176777	LAR
71	11	female	1	1	1	1	0.225	1	-0.975	1.025	SML	0.3	0	0.2	0.3	EVN
70	14	female	1	1	0	0	0	0	0	0	LDA	0	0	0	0	LDA
50	21	female	1	1	0	0	0.1	0.375	0.275	0.388104	LAR	0.05	0	-0.05	0.05	LDA
70	8	female	0	0	1	1	0	0	0	0	LDA	0	0	0	0	LDA
66	24	female	0	0	0	0	0.25	0.333333	0.583333	0.416667	LAR	0.5	0.291667	0.791667	0.578852	LAR
76	34	female	1	1	0	0	0.625	0.25	0.875	0.673146	LAR	0.725	0.25	0.775	0.766893	LAR
56	13	male	1	1	0	0	0	0	0	0	LDA	0	0	0	0	LDA
72	8	female	1	1	0	0	0.05	0.375	0.325	0.378319	LAR	0.05	0.375	0.325	0.378319	LAR
70	10	male	1	1	1	1	0	0	0	0	LDA	0.125	0	0.125	0.125	EVN
76	10	male	1	1	1	1	0.125	0.125	0.25	0.176777	LAR	0	0.125	0.125	0.125	EVN
63	12	male	0	0	0	0	0.375	0.25	0.125	0.450694	EVN	0.2	0	-0.2	0.2	SML
50	44	male	1	1	0	0	0	0.125	0.125	0.125	EVN	0	0.125	0.125	0.125	EVN
50	9	female	1	1	1	1	0.05	0	-0.05	0.05	LDA	0.1	0	-0.1	0.1	EVN
51	11	male	1	1	0	0	0.25	0	0.25	0.25	LAR	0	0	0	0	LDA
78	14	female	1	1	0	0	0	0	0	0	LDA	0	0	0	0	LDA
49	13	female	1	1	1	1	0	0.375	0.375	0.375	LAR	0	0.375	0.375	0.375	LAR
69	7	female	0	0	0	0	0.5	0.125	0.625	0.515388	LAR	0.25	0.125	0.375	0.279508	LAR
58	9	female	0	0	0	0	0	0	0	0	LDA	0	0	0	0	LDA
61	8	male	1	1	0	0	0.225	0	0.025	0.225	EVN	0.125	0	0.125	0.125	EVN
64	11	female	1	1	0	0	0.05	0	-0.05	0.05	LDA	0.425	0	0.325	0.425	LAR
65	9	female	1	1	0	0	0	0	0	0	LDA	0	0	0	0	LDA
78	7	female	0	0	0	0	0	0	0	0	LDA	0	0	0	0	LDA
70	11	female	1	1	0	0	0	0	0	0	LDA	0	0	0	0	LDA
76	10	female	1	1	0	0	0	0	0	0	LDA	0	0	0	0	LDA
63	7	male	1	1	0	0	0	0	0	0	LDA	0.125	0	0.125	0.125	EVN
60	12	female	0	0	0	0	0.25	0	0.25	0.25	LAR	0.25	0.125	0.375	0.279508	LAR
77	7	male	0	0	0	0	0	0	0	0	LDA	0	0	0	0	LDA
65	10	female	1	1	1	1	0.125	0	0.125	0.125	EVN	0.125	0.166667	0.291667	0.208333	LAR
73	7	female	1	1	0	0	0	0	0	0	LDA	0	0	0	0	LDA
54	14	female	1	1	0	0	0.3	0	0.2	0.3	EVN	0.5	0.25	0.75	0.559017	LAR
67	9	female	0	0	0	0	0.8	0.25	-0.05	0.838153	EVN	0.45	0	0.05	0.45	EVN
72	11	female	0	0	1	1	0.4	0.458333	0.558333	0.608333	LAR	0.45	0.583333	0.633333	0.736735	LAR
42	32	female	0	0	0	0	0.125	0.125	0.25	0.176777	LAR	0.125	0.125	0.25	0.176777	LAR
34	10	female	1	1	1	1	0.25	0	0.25	0.25	LAR	0.25	0	0.25	0.25	LAR
43	8	female	1	1	1	1	0	0	0	0	LDA	0.125	0	0.125	0.125	EVN
63	10	female	1	1	0	0	0.05	0.1	-0.15	0.111803	EVN	0.25	0.1	-0.35	0.269258	SML
54	8	male	1	1	0	0	0	0	0	0	LDA	0	0	0	0	LDA
59	7	female	1	1	1	1	0.125	0	0.125	0.125	EVN	0.225	0	0.025	0.225	EVN
63	8	female	1	1	1	1	0.45	0.125	-0.325	0.467039	SML	0.575	0.125	-0.2	0.58843	EVN
37	6	female	1	1	1	1	0.1	0.125	0.025	0.160078	EVN	0.55	0	0.45	0.55	LAR
54	6	male	0	0	0	0	0.25	0.166667	0.416667	0.300463	LAR	0.25	0	0.25	0.25	LAR
64	28	female	1	1	0	0	0.65	0.291667	0.641667	0.712439	LAR	0.8	0.166667	0.866667	0.817177	LAR
49	5	female	0	0	0	0	0.125	0	0.125	0.125	EVN	0	0	0	0	LDA
69	6	female	1	1	0	0	0	0	0	0	LDA	0	0	0	0	LDA
62	6	female	0	0	0	0	0	0	0	0	LDA	0	0	0	0	LDA
62	7	female	0	0	1	1	0.1	0.125	0.025	0.160078	EVN	0	0.25	0.25	0.25	LAR
82	6	female	1	1	0	0	1.3	1.75	-0.55	2.18002	SML	1.75	1.75	-0.5	2.47487	SML
70	8	female	1	1	1	1	0.425	0.291667	0.616667	0.515456	LAR	0.175	0.708333	0.783333	0.729631	LAR
51	13	female	1	1	1	1	0.375	0.166667	0.541667	0.410369	LAR	0.125	0.291667	0.416667	0.317324	LAR
54	5	female	1	1	1	0	0.6	0	0.4	0.6	LAR	0.5	0	0	0.5	EVN
61	6	female	1	1	1	1	0	0	0	0	LDA	0	0	0	0	LDA
46	9	female	1	1	1	1	0.375	0	0.375	0.375	LAR	0.375	0	0.375	0.375	LAR
59	10	female	1	1	0	0	0.35	0.291667	-0.0583333	0.455598	EVN	0.5	0.166667	-0.333333	0.527046	SML
78	5	female	0	0	0	0	0.25	0	0.25	0.25	LAR	0.25	0	0.25	0.25	LAR
25	6	female	1	1	1	1	0	0	0	0	LDA	0.125	0	0.125	0.125	EVN
75	5	male	1	1	0	0	0	0.125	0.125	0.125	EVN	0	0	0	0	LDA
58	8	male	1	1	0	0	0.25	0.125	-0.125	0.279508	EVN	0.1	0.125	0.025	0.160078	EVN
64	5	male	1	1	0	0	0	0	0	0	LDA	0	0	0	0	LDA
61	4	female	1	1	0	0	0	0.125	0.125	0.125	EVN	0	0	0	0	LDA
49	6	female	1	1	1	1	0	0	0	0	LDA	0	0	0	0	LDA
88	5	female	0	0	0	0	0.15	0	-0.15	0.15	EVN	0.275	0	-0.025	0.275	EVN
56	6	male	1	1	0	0	0	0	0	0	LDA	0.1	0.125	0.025	0.160078	EVN
57	5	male	1	1	0	0	0.4	1	-1.4	1.07703	SML	0.525	0.2	-0.475	0.561805	SML
64	4	female	1	1	0	0	0.1	0.125	0.025	0.160078	EVN	0	0	0	0	LDA
89	37	female	1	1	0	0	1.4	0.25	-0.15	1.42215	EVN	1.6	0.25	-0.35	1.61941	SML
80	7	female	1	1	0	0	0	0	0	0	LDA	0.05	0	-0.05	0.05	LDA
72	6	female	1	1	0	0	0	0.416667	0.416667	0.416667	LAR	0	0	0	0	LDA
75	28	female	1	1	0	0	0.7	0.375	0.175	0.794119	EVN	0.9	1.375	-1.025	1.64336	SML
82	4	female	1	1	0	0	0	0.125	0.125	0.125	EVN	0	0.125	0.125	0.125	EVN
54	8	female	1	1	1	1	0.1	0	-0.1	0.1	EVN	0.05	0	-0.05	0.05	LDA
56	16	female	1	0	1	0	0.225	1.125	-0.85	1.14728	SML	0.725	0.825	-0.05	1.09829	EVN
36	5	female	0	0	1	1	0	0	0	0	LDA	0	0	0	0	LDA
67	5	male	0	0	0	0	0.75	0	0.75	0.75	LAR	0.875	0	0.875	0.875	LAR
52	4	female	1	1	0	0	0.15	1.125	-1.025	1.13496	SML	0	0	0	0	LDA
44	5	male	0	0	0	0	0	0	0	0	LDA	0	0	0	0	LDA
80	4	female	1	1	0	0	0.45	1.25	-1.2	1.32853	SML	0.35	1.25	-1.1	1.29808	SML
73	5	male	0	0	1	0	0	0	0	0	LDA	0	0	0	0	LDA
83	4	male	0	0	0	0	0	0	0	0	LDA	0.4	0	-0.4	0.4	SML
69	4	female	0	0	0	0	0	0	0	0	LDA	0	0	0	0	LDA
56	4	female	1	1	0	0	0	0	0	0	LDA	0	0	0	0	LDA
73	4	female	1	1	1	0	0.25	0.375	0.625	0.450694	LAR	0.8	0.666667	1.36667	1.04137	LAR
57	3	female	0	0	0	0	0.125	0.125	0.25	0.176777	LAR	0.25	0.25	0.5	0.353553	LAR
30	5	male	0	0	1	1	0	0	0	0	LDA	0	0	0	0	LDA
61	27	male	0	0	1	1	0	0	0	0	LDA	0.25	0	0.25	0.25	LAR
69	6	female	1	1	0	0	0.25	0	0.25	0.25	LAR	0.25	0	0.25	0.25	LAR
50	4	female	1	1	1	1	0	0	0	0	LDA	0	0	0	0	LDA
72	5	female	1	0	0	0	0	0	0	0	LDA	0.5	0	-0.5	0.5	SML
51	3	female	0	0	0	0	0	0.25	0.25	0.25	LAR	0	0	0	0	LDA
83	0	male	0	0	1	1	0.05	0	-0.05	0.05	LDA	1.55	0.5	0.45	1.62865	LAR
45	5	female	0	0	1	1	0.325	0	-0.075	0.325	EVN	1.175	0.541667	0.116667	1.29384	EVN
53	4	male	1	1	1	1	0	0	0	0	LDA	0	0	0	0	LDA
60	5	male	1	1	0	0	0	0	0	0	LDA	0	0	0	0	LDA
72	5	female	1	1	0	0	0.75	0.1	0.15	0.756637	EVN	1.25	0.391667	0.441667	1.30992	LAR
39	3	female	1	1	0	0	0.15	0	-0.15	0.15	EVN	0.125	0.4	-0.275	0.419076	SML
87	13	female	0	0	0	0	0.25	0.5	0.75	0.559017	LAR	0.25	0.833333	1.08333	0.870026	LAR
63	4	female	1	1	0	0	0	0	0	0	LDA	0.125	0	0.125	0.125	EVN
56	12	male	1	1	0	0	0.1	0.125	0.025	0.160078	EVN	0.4	0.25	-0.15	0.471699	EVN
54	3	female	0	0	1	1	0	0	0	0	LDA	0	0	0	0	LDA
68	10	female	0	0	1	0	0.5	0.291667	-0.208333	0.578852	SML	1.2	0.291667	0.591667	1.23494	LAR
66	3	male	1	1	0	0	0	0	0	0	LDA	0	0	0	0	LDA
75	5	female	1	1	0	0	0	0	0	0	LDA	0	0	0	0	LDA
42	6	male	1	1	0	0	0	0	0	0	LDA	0	0	0	0	LDA
53	5	female	1	1	0	0	0	0.125	0.125	0.125	EVN	0	0	0	0	LDA
65	32	female	1	1	0	0	0.525	0.428571	0.653571	0.677716	LAR	1.5	0.875	-0.625	1.73656	SML
66	17	female	1	1	0	0	0	0	0	0	LDA	0	0	0	0	LDA
76	10	female	0	0	0	0	0.125	0	0.125	0.125	EVN	0	0	0	0	LDA
72	3	female	0	0	0	0	0	0	0	0	LDA	0.125	0	0.125	0.125	EVN
78	41	female	1	1	0	0	0	0	0	0	LDA	0	0	0	0	LDA
66	16	female	1	1	0	0	0	0	0	0	LDA	0	0	0	0	LDA
70	3	female	1	1	0	1	0.125	0	0.125	0.125	EVN	0.125	0.125	0.25	0.176777	LAR
102	14	female	0	0	0	0	0	0	0	0	LDA	0	0	0	0	LDA
60	14	female	0	0	0	0	0.375	0	0.375	0.375	LAR	0.125	0	0.125	0.125	EVN
79	13	female	0	0	0	0	0.7	0	0.3	0.7	LAR	0	0	0	0	LDA
75	12	female	0	0	1	1	0	0	0	0	LDA	0	0	0	0	LDA
55	12	female	0	0	0	0	0	0	0	0	LDA	0	0	0	0	LDA
72	12	male	1	1	0	0	0	0.125	0.125	0.125	EVN	0	0.166667	0.166667	0.166667	EVN
60	7	female	0	0	0	1	0.25	0.125	0.375	0.279508	LAR	0.375	0.25	0.625	0.450694	LAR
76	11	female	1	1	0	0	0.125	0	0.125	0.125	EVN	0	0.125	0.125	0.125	EVN
86	9	female	0	0	0	0	0	0	0	0	LDA	0	0.125	0.125	0.125	EVN
71	4	female	0	0	0	0	0.125	0	0.125	0.125	EVN	0	0	0	0	LDA
74	10	male	0	0	0	0	0	0	0	0	LDA	0	0	0	0	LDA
64	1	female	0	0	0	0	0.15	0.416667	0.266667	0.442844	LAR	0	0	0	0	LDA
64	9	female	0	0	0	0	0	0.125	0.125	0.125	EVN	0	0	0	0	LDA
59	29	female	0	0	0	0	0	0	0	0	LDA	0	0.1	-0.1	0.1	EVN
59	9	female	1	1	0	0	0	0	0	0	LDA	0	0	0	0	LDA
55	8	female	0	0	0	0	0	0	0	0	LDA	0	0	0	0	LDA
67	37	female	1	1	0	0	0.125	0	0.125	0.125	EVN	0.25	0	0.25	0.25	LAR
29	6	female	1	1	1	1	0	0	0	0	LDA	0	0	0	0	LDA
69	24	male	1	1	0	0	0	0	0	0	LDA	0	0	0	0	LDA
61	5	male	1	0	1	1	0.675	0.125	0.2	0.686477	EVN	0	0.25	0.25	0.25	LAR
63	5	female	0	0	0	0	0	0	0	0	LDA	0	0	0	0	LDA
62	5	female	0	0	0	0	0.25	0	0.25	0.25	LAR	0.375	0	0.375	0.375	LAR
72	44	female	0	0	0	0	0	0	0	0	LDA	0	0	0	0	LDA
59	4	female	1	1	0	1	0	0	0	0	LDA	0	0	0	0	LDA
63	2	female	1	1	0	0	0.125	0	0.125	0.125	EVN	0.2	0	-0.2	0.2	SML
38	3	female	1	1	0	0	0	0	0	0	LDA	0	0	0	0	LDA
37	6	female	1	1	1	1	0	0	0	0	LDA	0	0	0	0	LDA
43	4	female	1	1	1	1	0	0	0	0	LDA	0.125	0	0.125	0.125	EVN
58	13	male	0	0	1	1	0	0	0	0	LDA	0	0	0	0	LDA
52	20	female	0	0	0	0	0.325	0	-0.075	0.325	EVN	0.425	0	-0.175	0.425	EVN
70	43	female	0	0	0	0	0	0	0	0	LDA	0	0	0	0	LDA
80	53	female	1	1	0	0	0	0	0	0	LDA	0	0	0	0	LDA
77	8	male	0	0	1	1	0	0.125	0.125	0.125	EVN	0.4	1.125	-1.275	1.194	SML
65	45	female	0	0	0	0	0	0	0	0	LDA	0	0	0	0	LDA
80	45	female	0	0	0	0	0	0	0	0	LDA	0	0	0	0	LDA
63	33	female	0	0	0	0	0	0.166667	0.166667	0.166667	EVN	0	0	0	0	LDA
68	42	male	0	0	0	0	0	0	0	0	LDA	0.5	0	0.5	0.5	LAR
72	37	female	0	0	1	1	0	0	0	0	LDA	0	0	0	0	LDA
71	49	female	1	1	0	0	0	0.125	0.125	0.125	EVN	0	0	0	0	LDA
84	36	female	0	0	0	0	0.285714	0	0.285714	0.285714	LAR	0	0	0	0	LDA
80	55	male	1	1	0	0	0	0	0	0	LDA	0	0	0	0	LDA
70	15	female	1	1	0	0	0.225	0	0.025	0.225	EVN	0.9	0	-0.4	0.9	SML
81	43	female	1	1	0	0	0	0.166667	0.166667	0.166667	EVN	0	0.166667	0.166667	0.166667	EVN
72	53	female	0	0	0	0	0	0.125	0.125	0.125	EVN	0	0	0	0	LDA
74	36	female	0	0	0	0	0.1	0	-0.1	0.1	EVN	0.175	0.1	-0.025	0.201556	EVN
61	38	female	0	0	0	0	0.333333	0.166667	0.5	0.372678	LAR	0.25	0.125	0.375	0.279508	LAR
74	31	female	1	1	0	0	0	0	0	0	LDA	0	0	0	0	LDA
78	42	female	1	1	0	0	0	0	0	0	LDA	0	0	0	0	LDA
78	43	female	0	0	0	0	0	0	0	0	LDA	0	0	0	0	LDA
80	41	female	0	0	0	0	0	0.4	0.4	0.4	LAR	0	0	0	0	LDA
77	35	female	0	0	0	1	1.35	1.03333	-0.216667	1.70008	SML	0.525	0.625	-0.15	0.816241	EVN
73	33	female	1	1	0	0	0.125	0.25	0.375	0.279508	LAR	0	0	0	0	LDA
86	53	female	0	0	0	0	0	0	0	0	LDA	0	0	0	0	LDA
88	36	female	0	0	0	0	0	0	0	0	LDA	0	0	0	0	LDA
79	38	female	0	0	0	0	0	0	0	0	LDA	0	0	0	0	LDA
78	43	female	0	0	0	0	0	0	0	0	LDA	0	0	0	0	LDA
71	35	female	1	1	0	0	0.9	0	0.1	0.9	EVN	0.5	0.25	0.75	0.559017	LAR
79	21	female	1	1	0	0	0.05	0	-0.05	0.05	LDA	0	0	0	0	LDA
71	4	female	0	0	0	0	0.225	0	0.025	0.225	EVN	0.25	0.25	0.5	0.353553	LAR
58	4	female	0	0	0	0	0.05	0	-0.05	0.05	LDA	0	0	0	0	LDA
78	32	female	0	0	0	0	0.35	0	0.15	0.35	EVN	0.125	0	0.125	0.125	EVN
70	38	female	0	0	0	0	0	0	0	0	LDA	0	0	0	0	LDA
75	45	female	0	0	0	0	0	0	0	0	LDA	0	0	0	0	LDA
73	44	female	0	0	0	0	0	0	0	0	LDA	0	0	0	0	LDA
78	4	female	1	1	0	0	0	0	0	0	LDA	0	0	0	0	LDA
66	32	female	1	1	1	1	0	0.333333	0.333333	0.333333	LAR	0.25	0	0.25	0.25	LAR
72	42	female	1	1	0	0	0	0	0	0	LDA	0	0	0	0	LDA
61	34	female	1	1	0	0	0.45	0	0.05	0.45	EVN	0	0	0	0	LDA
62	45	female	0	0	1	0	0.1	0	-0.1	0.1	EVN	0.6	0.533333	-0.466667	0.802773	SML
72	43	female	1	1	0	0	0	0	0	0	LDA	0.125	0	0.125	0.125	EVN
81	51	female	1	1	0	0	1.775	0.5	-0.525	1.84408	SML	0.8	0.325	0.125	0.863496	EVN
71	12	female	1	1	0	0	0	0	0	0	LDA	0.125	0.25	0.375	0.279508	LAR
72	45	male	0	0	0	0	0	0	0	0	LDA	0.35	0	-0.35	0.35	SML
61	39	female	0	0	0	0	0.125	0	0.125	0.125	EVN	0.5	0.291667	0.791667	0.578852	LAR
87	40	female	0	0	0	0	0.125	0.285714	0.410714	0.311862	LAR	0	0	0	0	LDA
68	31	female	0	0	0	0	0	0.125	0.125	0.125	EVN	0.25	0	0.25	0.25	LAR
67	39	female	0	0	0	0	0.2	0	-0.2	0.2	SML	0.45	0.25	-0.2	0.514781	EVN
70	31	female	0	0	1	1	0.433333	0	0.233333	0.433333	LAR	0	0.25	0.25	0.25	LAR
73	32	female	1	1	0	0	0.15	0.142857	-0.00714286	0.207143	EVN	0.1	0.666667	0.566667	0.674125	LAR
70	16	female	1	1	0	0	0	0	0	0	LDA	0	0	0	0	LDA
73	35	female	1	1	0	0	0	0	0	0	LDA	0	0.333333	0.333333	0.333333	LAR
76	37	female	1	1	0	0	0	0	0	0	LDA	0.25	0	0.25	0.25	LAR
65	18	female	1	1	0	0	0.25	0	0.25	0.25	LAR	0.25	0	0.25	0.25	LAR
80	35	female	1	1	0	0	0.142857	0	0.142857	0.142857	EVN	0.125	0	0.125	0.125	EVN
76	31	female	1	1	0	0	0.05	0	-0.05	0.05	LDA	0	0	0	0	LDA
78	19	female	1	1	0	0	0	0	0	0	LDA	0.25	0	0.25	0.25	LAR
78	36	female	1	1	0	0	0.4	0	-0.4	0.4	SML	0	0	0	0	LDA
56	4	female	0	0	0	0	0.05	0.1	-0.15	0.111803	EVN	0	0.1	-0.1	0.1	EVN
75	33	female	0	0	0	1	0.6	0.25	0.15	0.65	EVN	0.225	0	0.025	0.225	EVN
77	20	female	1	1	1	1	0.225	0	0.025	0.225	EVN	0	0	0	0	LDA
74	2	female	1	1	0	0	0	0	0	0	LDA	0.1	0	-0.1	0.1	EVN
64	13	female	0	0	0	0	0	0	0	0	LDA	0	0	0	0	LDA
70	7	female	0	0	0	0	0.05	0	-0.05	0.05	LDA	0.2	0	-0.2	0.2	SML
64	5	female	0	0	0	0	0	0	0	0	LDA	0	0	0	0	LDA
45	30	male	0	0	0	0	0.3	0	0.2	0.3	EVN	0	0	0	0	LDA
79	30	female	1	1	0	0	0	0	0	0	LDA	0	0	0	0	LDA
82	11	female	0	0	0	0	0.7	0.5	0.8	0.860233	LAR	0.325	0	-0.075	0.325	EVN
80	58	female	0	0	0	0	0	0	0	0	LDA	0	0	0	0	LDA
73	48	female	1	0	0	0	0.1	0.2	0.1	0.223607	EVN	0	0	0	0	LDA
75	30	female	0	0	0	0	0.175	0	0.075	0.175	EVN	0.175	0	0.075	0.175	EVN
60	4	female	0	0	0	0	0.05	0	-0.05	0.05	LDA	0	0	0	0	LDA
67	7	male	1	1	0	0	0	0	0	0	LDA	0	0	0	0	LDA
73	48	male	1	1	0	0	0	0.142857	0.142857	0.142857	EVN	0	0.125	0.125	0.125	EVN
70	41	female	1	1	0	0	0.2	0	-0.2	0.2	SML	0	0	0	0	LDA
71	35	female	0	0	0	0	0.125	0	0.125	0.125	EVN	0	0	0	0	LDA
68	37	female	1	1	0	0	0	0	0	0	LDA	0.25	0	0.25	0.25	LAR
85	37	female	0	0	0	0	0	0.1	-0.1	0.1	EVN	0	0	0	0	LDA
66	38	female	0	0	1	1	0	0	0	0	LDA	0	0	0	0	LDA
69	34	female	0	0	0	0	0	0.2	0.2	0.2	LAR	0	0	0	0	LDA
80	33	female	0	0	0	0	0	0	0	0	LDA	0	0	0	0	LDA
65	1	female	0	0	0	0	0.25	0	-0.25	0.25	SML	0	0	0	0	LDA
67	17	female	1	0	0	0	0.95	0.2	0.35	0.970824	LAR	0.65	0.1	-0.25	0.657647	SML
73	2	female	1	1	0	0	0.05	0	-0.05	0.05	LDA	0.25	0	0.25	0.25	LAR
59	1	male	0	1	0	0	0.675	0.416667	-0.00833333	0.793244	EVN	0.5	0.291667	0.291667	0.578852	LAR
69	22	female	1	1	1	1	0.125	0	0.125	0.125	EVN	0.25	0	0.25	0.25	LAR
75	13	male	0	0	0	0	0.5	0	0.5	0.5	LAR	0	0	0	0	LDA
62	34	female	1	1	1	1	0	0.25	0.25	0.25	LAR	0	0.25	0.25	0.25	LAR
78	1	female	1	1	0	0	0	0.25	0.25	0.25	LAR	0	0.25	0.25	0.25	LAR
52	11	female	1	1	0	0	0.1	0	-0.1	0.1	EVN	0	0.2	-0.2	0.2	SML
45	43	female	0	0	0	0	0.05	0	-0.05	0.05	LDA	0.525	0.25	0.475	0.581485	LAR
77	30	female	1	1	0	0	0.05	1	-1.05	1.00125	SML	0.225	0	0.025	0.225	EVN
72	17	female	1	1	0	0	0	0	0	0	LDA	0	0	0	0	LDA
81	30	female	1	1	0	0	0	0	0	0	LDA	0	0.25	0.25	0.25	LAR
69	41	female	1	1	0	0	0	0	0	0	LDA	0	0	0	0	LDA
70	35	female	0	0	0	0	0.05	0.125	0.075	0.134629	EVN	0	0	0	0	LDA
62	43	male	1	1	0	0	0.25	0	0.25	0.25	LAR	0	0	0	0	LDA
60	7	female	0	0	1	1	0.55	1.29167	-0.258333	1.40389	SML	0	0	0	0	LDA
73	29	female	1	1	0	0	0.325	0	-0.075	0.325	EVN	0.05	0	-0.05	0.05	LDA
85	39	female	0	0	0	0	0	0	0	0	LDA	0	0	0	0	LDA
66	1	female	1	1	0	0	0.05	0	-0.05	0.05	LDA	0	0	0	0	LDA
52	13	female	1	1	0	0	0.475	0	0.275	0.475	LAR	0	0	0	0	LDA
79	4	female	1	1	0	0	0	0.225	0.025	0.225	EVN	0.125	0.125	0.25	0.176777	LAR
73	15	female	1	1	1	1	0	0	0	0	LDA	0	0	0	0	LDA
54	2	female	1	1	0	0	0	0	0	0	LDA	0	0	0	0	LDA
60	31	female	0	0	1	1	0	0	0	0	LDA	0	0	0	0	LDA
79	4	female	0	0	0	0	0.375	0	0.375	0.375	LAR	1.7	0.5	0.3	1.772	LAR
81	8	female	1	1	0	0	0.8	0	-0.8	0.8	SML	0.4	0	-0.4	0.4	SML
82	31	female	0	0	0	0	0	0	0	0	LDA	0	0	0	0	LDA
70	1	female	1	1	0	0	0.475	0.4	-0.125	0.620987	EVN	0.25	0	0.25	0.25	LAR
66	40	female	0	0	1	1	0	0.125	0.125	0.125	EVN	0	0	0	0	LDA
66	6	female	1	1	0	0	0.1	0	-0.1	0.1	EVN	0.15	0	-0.15	0.15	EVN
68	16	male	0	0	0	0	0	0	0	0	LDA	0	0	0	0	LDA
67	12	male	0	1	0	0	0.25	0	0.25	0.25	LAR	0.35	1.58333	-0.766667	1.62156	SML
65	30	female	0	0	0	0	0.05	0	-0.05	0.05	LDA	0.05	0	-0.05	0.05	LDA
67	34	female	0	0	0	0	0	0.375	0.375	0.375	LAR	0	0.25	0.25	0.25	LAR
75	29	female	1	1	0	0	0.125	0	0.125	0.125	EVN	0.25	0.3	-0.55	0.390512	SML
70	34	female	1	1	0	0	0	0	0	0	LDA	0	0	0	0	LDA
67	13	female	1	1	0	0	0	0	0	0	LDA	0.7	1.5	-0.2	1.65529	SML
72	30	female	1	1	0	0	0.225	0	0.025	0.225	EVN	0.225	0	0.025	0.225	EVN
62	3	male	1	0	0	0	0	0	0	0	LDA	0	0	0	0	LDA
64	39	female	1	1	1	1	0	0	0	0	LDA	0.1	0	-0.1	0.1	EVN
74	28	male	0	0	0	0	0	0	0	0	LDA	0	0	0	0	LDA
68	9	male	0	1	0	0	0	0	0	0	LDA	0	0	0	0	LDA
86	30	male	0	0	0	0	0	0	0	0	LDA	0	0	0	0	LDA
69	7	female	0	0	0	0	0	0	0	0	LDA	0.6	0	0.4	0.6	LAR
73	12	female	0	0	1	1	0.425	0.25	0.575	0.493077	LAR	0.725	0	0.525	0.725	LAR
69	19	female	1	1	0	0	0	0	0	0	LDA	0	0	0	0	LDA
78	22	female	0	0	0	0	1.1	0.5	0.4	1.2083	LAR	1.6	0.75	0.65	1.76706	LAR
69	29	female	1	1	0	0	0.1	0	-0.1	0.1	EVN	0.1	0	-0.1	0.1	EVN
72	26	female	0	0	0	0	0	0	0	0	LDA	0	0	0	0	LDA
72	29	female	1	1	0	0	0.45	0.525	-0.725	0.691466	SML	0.725	0.2	-0.675	0.75208	SML
70	29	female	1	1	0	0	0	0	0	0	LDA	0.125	0	0.125	0.125	EVN
70	19	female	0	0	0	0	1.06667	0	0.266667	1.06667	LAR	0.75	0	0.25	0.75	LAR
29	6	female	0	0	0	1	0.375	0	0.375	0.375	LAR	0	0	0	0	LDA
64	16	female	1	1	0	0	0	0	0	0	LDA	0.7	0	-0.7	0.7	SML
70	29	female	1	1	0	0	0.45	0	0.05	0.45	EVN	0.125	0	0.125	0.125	EVN
72	1	female	0	1	0	0	0	0	0	0	LDA	0	0	0	0	LDA
81	28	female	1	1	0	0	0.375	0	0.375	0.375	LAR	0	0	0	0	LDA
66	18	female	1	1	0	0	0.375	0.1	-0.225	0.388104	SML	0.25	0	-0.25	0.25	SML
74	15	female	1	1	0	0	0.55	0	-0.05	0.55	EVN	0.5	0	0.5	0.5	LAR
65	17	female	0	0	0	0	0.3	0.675	0.275	0.738664	LAR	0.5	0	0.5	0.5	LAR
70	34	female	1	1	0	0	0.125	0	0.125	0.125	EVN	0.125	0	0.125	0.125	EVN
69	29	female	0	0	0	0	0.7	0.125	0.425	0.711073	LAR	0	0.125	0.125	0.125	EVN
78	8	male	1	1	0	0	0	0.695238	0.495238	0.695238	LAR	0.7	0.325	0.225	0.771767	LAR
64	35	female	1	1	0	0	0	0.291667	0.291667	0.291667	LAR	0	0.125	0.125	0.125	EVN
72	34	female	1	1	0	0	0	0	0	0	LDA	0.1	0.125	0.025	0.160078	EVN
70	28	male	0	0	1	1	0	0	0	0	LDA	0	0	0	0	LDA
57	8	female	0	0	0	0	0	0	0	0	LDA	0.425	0	0.325	0.425	LAR
71	29	female	0	0	0	0	0.3	0	-0.3	0.3	SML	0.35	0.766667	-0.783333	0.84278	SML
76	45	female	1	1	0	0	0.35	0	0.15	0.35	EVN	0.175	0	0.075	0.175	EVN
68	29	female	0	0	0	0	0.1	0	-0.1	0.1	EVN	0	0	0	0	LDA
68	6	female	1	1	0	0	0.25	0	0.25	0.25	LAR	0.25	0	0.25	0.25	LAR
67	9	female	1	1	0	0	0	0	0	0	LDA	0	0	0	0	LDA
67	14	female	0	0	0	0	0.125	0	0.125	0.125	EVN	0	0	0	0	LDA
71	14	female	1	1	0	0	0	0	0	0	LDA	0	0	0	0	LDA
73	29	female	1	1	0	0	0.75	0	0.75	0.75	LAR	0.125	0	0.125	0.125	EVN
77	29	male	0	0	0	0	0.5	0.125	0.625	0.515388	LAR	0.25	0	0.25	0.25	LAR
74	24	female	1	1	0	0	0.25	0	0.25	0.25	LAR	0.3	0	0.2	0.3	EVN
81	29	male	0	0	0	0	0	0	0	0	LDA	0	0	0	0	LDA
63	8	female	0	0	0	0	0	0	0	0	LDA	0	0	0	0	LDA
78	32	female	1	1	0	0	0	0	0	0	LDA	0	0	0	0	LDA
67	14	female	0	0	0	0	0	0	0	0	LDA	0.05	0	-0.05	0.05	LDA
81	5	female	0	0	0	0	0.25	0.591667	0.241667	0.642316	LAR	0.125	0	0.125	0.125	EVN
71	30	female	0	0	0	0	0.25	0	0.25	0.25	LAR	0.3	0	0.2	0.3	EVN
70	5	female	1	1	0	0	0.175	0.1	-0.025	0.201556	EVN	0.425	0.1	0.225	0.436606	LAR
73	1	female	1	1	0	0	0	0	0	0	LDA	0	0.3	-0.3	0.3	SML
91	14	female	0	0	0	0	0	0.25	0.25	0.25	LAR	0.5	0.583333	1.08333	0.768295	LAR
48	12	female	1	1	0	0	0	0	0	0	LDA	0	0	0	0	LDA
61	7	female	0	0	0	0	0	0	0	0	LDA	0	0	0	0	LDA
78	32	female	1	1	0	0	0	0	0	0	LDA	0.125	0	0.125	0.125	EVN
72	25	female	1	1	0	0	0.25	0	0.25	0.25	LAR	0.25	0	0.25	0.25	LAR
76	29	female	0	0	0	0	0.125	0	0.125	0.125	EVN	0.125	0	0.125	0.125	EVN
68	5	female	1	1	0	0	0.2	0	-0.2	0.2	SML	0.05	0	-0.05	0.05	LDA
63	5	female	1	1	0	0	0.225	0.25	0.275	0.336341	LAR	0.6	0.25	0.65	0.65	LAR
61	29	female	1	1	0	0	0.142857	0	0.142857	0.142857	EVN	0	0	0	0	LDA
80	6	female	0	0	0	0	0.3	0.166667	-0.133333	0.343188	EVN	0	0	0	0	LDA
64	35	female	1	1	0	0	0.142857	0.833333	-0.0238095	0.84549	EVN	0.25	0.125	0.375	0.279508	LAR
76	27	female	1	1	0	0	0	0.666667	0.666667	0.666667	LAR	0	0.25	0.25	0.25	LAR
65	7	female	0	0	0	0	0	0	0	0	LDA	0	0	0	0	LDA
72	14	female	0	1	1	1	1.15	0.125	-0.525	1.15677	SML	0.825	1.025	-0.85	1.31577	SML
64	28	female	1	1	0	0	0	0.166667	0.166667	0.166667	EVN	0	0	0	0	LDA
76	6	male	1	0	0	0	0.65	0	-0.15	0.65	EVN	0.4	0	0.1	0.4	EVN
72	33	female	0	0	0	0	0	0	0	0	LDA	0	0	0	0	LDA
80	29	female	0	0	0	0	0.4	0	0.1	0.4	EVN	0	0	0	0	LDA
59	5	female	1	1	0	0	0.75	0.25	1	0.790569	LAR	0.7	0.25	0.55	0.743303	LAR
79	2	female	1	1	0	0	0	0	0	0	LDA	0.05	0	-0.05	0.05	LDA
69	33	female	1	1	1	1	0	0.1	-0.1	0.1	EVN	0	0	0	0	LDA
66	41	female	0	0	1	1	0.5	0	0.5	0.5	LAR	0	0	0	0	LDA
77	28	female	1	1	0	0	0	0	0	0	LDA	0	0	0	0	LDA
75	35	female	0	0	1	1	0	0	0	0	LDA	0.125	0	0.125	0.125	EVN
65	28	male	0	0	0	0	0	0	0	0	LDA	0	0	0	0	LDA
62	28	female	0	0	0	0	0	0	0	0	LDA	0.35	0	0.15	0.35	EVN
64	29	female	0	0	0	0	0	0	0	0	LDA	0	0	0	0	LDA
55	27	female	0	0	0	0	0	0	0	0	LDA	0	0	0	0	LDA
61	30	female	1	1	0	0	0	0	0	0	LDA	0	0	0	0	LDA
77	27	female	0	0	0	0	0.175	0	0.075	0.175	EVN	0.25	0	0.25	0.25	LAR
66	34	female	0	0	0	0	0.125	0	0.125	0.125	EVN	0	0.2	-0.2	0.2	SML
38	20	female	1	1	0	0	0	0.142857	0.142857	0.142857	EVN	0.05	0	-0.05	0.05	LDA
88	11	female	0	0	0	0	0.5	0	0.5	0.5	LAR	0.375	0	0.375	0.375	LAR
64	27	female	1	1	0	0	0	0.309524	0.309524	0.309524	LAR	0	0	0	0	LDA
67	17	female	1	1	0	0	0.125	0	0.125	0.125	EVN	0.125	0	0.125	0.125	EVN
66	29	female	1	1	1	1	0	0	0	0	LDA	0	0	0	0	LDA
62	11	female	1	1	0	0	0	0	0	0	LDA	0	0	0	0	LDA
70	1	male	1	1	0	0	0.125	0	0.125	0.125	EVN	0	0	0	0	LDA
79	13	male	0	0	0	0	0.1	0.125	0.025	0.160078	EVN	0	0	0	0	LDA
54	18	female	1	1	0	0	0.292857	0	-0.00714285	0.292857	EVN	0	0	0	0	LDA
89	6	female	1	1	0	0	0.125	0	0.125	0.125	EVN	0.25	0	0.25	0.25	LAR
59	27	male	1	1	0	0	0.125	0	0.125	0.125	EVN	0.4	0	-0.4	0.4	SML
75	27	female	1	1	0	0	0.125	0	0.125	0.125	EVN	0.125	0	0.125	0.125	EVN
70	27	female	0	0	0	0	0.1	0	-0.1	0.1	EVN	0.45	0.125	-0.325	0.467039	SML
63	11	female	1	1	0	0	0	0	0	0	LDA	0.125	0	0.125	0.125	EVN
79	2	male	0	0	0	0	0	0	0	0	LDA	0	0	0	0	LDA
86	22	female	0	0	0	0	0	0.125	0.125	0.125	EVN	0	0	0	0	LDA
69	48	female	1	1	0	0	0	0	0	0	LDA	0	0	0	0	LDA
74	42	female	0	0	0	0	0	0	0	0	LDA	0	0	0	0	LDA
74	19	female	1	1	0	0	0	0	0	0	LDA	0.25	0.125	0.375	0.279508	LAR
73	8	male	1	1	0	0	0.1	0	-0.1	0.1	EVN	0.35	0.25	-0.1	0.430116	EVN
62	27	female	1	1	0	0	0.1	0	-0.1	0.1	EVN	0.2	0	-0.2	0.2	SML
58	23	female	1	1	0	0	0	0.25	0.25	0.25	LAR	0.35	0.125	0.275	0.371652	LAR
70	27	female	0	1	1	1	0.5	0	0.5	0.5	LAR	0.175	1	-0.925	1.0152	SML
71	6	female	1	1	0	0	0	0	0	0	LDA	0	0.125	0.125	0.125	EVN
65	27	female	1	1	0	0	0.25	0	0.25	0.25	LAR	0.125	0	0.125	0.125	EVN
77	5	female	1	1	0	0	0.1	0	-0.1	0.1	EVN	0.125	0	0.125	0.125	EVN
75	1	female	0	0	0	0	0.15	0	-0.15	0.15	EVN	0.2	0	-0.2	0.2	SML
73	33	female	0	0	0	0	0	0.125	0.125	0.125	EVN	0.125	0.125	0.25	0.176777	LAR
64	26	female	1	1	0	0	0.175	0	0.075	0.175	EVN	0.05	0	-0.05	0.05	LDA
65	6	female	0	0	0	0	0.25	0	0.25	0.25	LAR	0.25	0	0.25	0.25	LAR
79	39	female	1	1	0	0	0	0.125	0.125	0.125	EVN	0	0.25	0.25	0.25	LAR
54	7	female	1	1	0	0	0.65	0.125	0.475	0.66191	LAR	0.275	0	-0.025	0.275	EVN
50	27	male	0	1	0	0	0	0	0	0	LDA	0.225	0	0.025	0.225	EVN
64	29	female	0	0	0	0	0.125	0	0.125	0.125	EVN	0.125	0	0.125	0.125	EVN
76	58	female	0	0	0	0	0.5	0	0.5	0.5	LAR	0	0	0	0	LDA
88	48	female	0	0	0	0	0	0	0	0	LDA	0.25	0	0.25	0.25	LAR
31	6	female	1	1	0	0	0.05	0	-0.05	0.05	LDA	0.05	0	-0.05	0.05	LDA
69	26	female	0	0	1	1	0.125	0	0.125	0.125	EVN	0	0.125	0.125	0.125	EVN
72	26	female	1	1	0	0	0.125	0	0.125	0.125	EVN	0	0	0	0	LDA
72	8	female	0	0	0	0	0	0	0	0	LDA	0.625	0.458333	0.583333	0.775045	LAR
53	10	female	0	0	0	0	0.25	0	0.25	0.25	LAR	0	0	0	0	LDA
75	19	male	1	1	0	0	0	0	0	0	LDA	0	0	0	0	LDA
68	26	female	1	1	0	0	0	0	0	0	LDA	0.05	0	-0.05	0.05	LDA
64	7	female	1	1	0	0	0	0	0	0	LDA	0.1	0.1	-0.2	0.141421	SML
43	26	female	0	0	0	0	0.125	0	0.125	0.125	EVN	0.125	0	0.125	0.125	EVN
65	11	female	0	1	0	0	0.175	0	0.075	0.175	EVN	0	0	0	0	LDA
70	38	female	1	1	1	1	0	0	0	0	LDA	0	0	0	0	LDA
70	27	female	0	0	0	0	0	0	0	0	LDA	0	0	0	0	LDA
57	2	male	1	1	0	0	0	0	0	0	LDA	0	0	0	0	LDA
60	27	female	0	0	1	1	0	0	0	0	LDA	0	0	0	0	LDA
51	12	female	1	1	1	0	0.325	0	-0.075	0.325	EVN	0.225	0	0.025	0.225	EVN
63	22	female	0	0	1	1	0	0.2	0.2	0.2	LAR	0.125	0.125	0.25	0.176777	LAR
43	26	female	0	0	0	0	0.225	0	0.025	0.225	EVN	0.175	0	0.075	0.175	EVN
73	3	female	1	1	0	0	0	0	0	0	LDA	0	0.125	0.125	0.125	EVN
75	23	female	1	1	0	0	0	0.25	0.25	0.25	LAR	0	0.166667	0.166667	0.166667	EVN
40	1	female	1	1	0	0	0	0.25	0.25	0.25	LAR	0	0	0	0	LDA
59	32	female	1	0	1	1	0	0	0	0	LDA	0.25	0	0.25	0.25	LAR
59	9	female	1	1	0	0	0	0	0	0	LDA	0	0.6	-0.6	0.6	SML
64	37	female	1	1	0	0	0.5	0.4	0.1	0.640312	EVN	0.125	0	0.125	0.125	EVN
56	8	female	1	1	0	0	0	0	0	0	LDA	0.05	0	-0.05	0.05	LDA
65	7	female	1	1	0	0	0.525	0	-0.275	0.525	SML	1.575	1.24167	0.0166667	2.00558	EVN
53	24	female	0	0	0	0	0	0	0	0	LDA	0.1	0	-0.1	0.1	EVN
70	42	female	0	0	0	0	0.35	0	0.15	0.35	EVN	0.25	0	0.25	0.25	LAR
75	26	female	0	0	0	0	0	0	0	0	LDA	0	0	0	0	LDA
74	6	female	0	0	0	0	0.65	0	-0.65	0.65	SML	0.4	0	-0.4	0.4	SML
76	8	female	1	1	0	0	0	0	0	0	LDA	0	0	0	0	LDA
61	12	female	1	1	0	0	0	0	0	0	LDA	0.125	0	0.125	0.125	EVN
77	4	female	0	0	1	0	0	0	0	0	LDA	0	0	0	0	LDA
65	26	female	0	0	0	0	0	0	0	0	LDA	0	0	0	0	LDA
74	28	female	0	0	0	0	0	0	0	0	LDA	0	0	0	0	LDA
55	30	female	0	0	0	0	0	0	0	0	LDA	0.375	0	0.375	0.375	LAR
68	24	female	1	1	0	0	0	0	0	0	LDA	0.25	0	0.25	0.25	LAR
70	7	female	0	0	0	0	0	0	0	0	LDA	0.25	0	0.25	0.25	LAR
64	38	female	1	1	0	0	0.125	0	0.125	0.125	EVN	0.25	0	0.25	0.25	LAR
57	24	female	1	1	1	1	0.125	0	0.125	0.125	EVN	0.25	0	0.25	0.25	LAR
68	26	female	1	1	0	0	0	0	0	0	LDA	0	0	0	0	LDA
62	19	female	0	0	1	1	0.125	0	0.125	0.125	EVN	0.25	0	0.25	0.25	LAR
56	2	female	1	1	0	0	0	0	0	0	LDA	0	0	0	0	LDA
86	26	female	0	0	0	0	0	0	0	0	LDA	0	0	0	0	LDA
66	10	female	0	0	0	0	0	0	0	0	LDA	0	0	0	0	LDA
59	10	female	1	1	0	0	0.675	0	0.075	0.675	EVN	0.475	0.25	0.525	0.536773	LAR
62	27	female	1	1	0	0	0.125	0	0.125	0.125	EVN	0	0.125	0.125	0.125	EVN
73	6	female	1	1	0	0	0.1	0	-0.1	0.1	EVN	0.1	0	-0.1	0.1	EVN
73	30	female	0	0	0	0	0.5	0	0.5	0.5	LAR	0.25	0	0.25	0.25	LAR
47	8	female	1	1	0	0	0	0	0	0	LDA	0	0	0	0	LDA
78	22	female	1	1	0	0	0.8	0	-0.8	0.8	SML	0.95	0	-0.45	0.95	SML
73	16	female	1	1	0	0	0.35	0	0.15	0.35	EVN	0.25	0	0.25	0.25	LAR
53	37	female	0	0	0	0	0.125	0.291667	0.416667	0.317324	LAR	0	0	0	0	LDA
64	2	female	0	0	0	0	0	0.2	-0.2	0.2	SML	0	0.2	-0.2	0.2	SML
70	17	female	1	1	0	0	0	0	0	0	LDA	0	0	0	0	LDA
80	2	female	1	1	0	1	0.125	0	0.125	0.125	EVN	0.1	0.1	-0.2	0.141421	SML
71	33	female	1	1	0	0	0.125	0	0.125	0.125	EVN	0	0	0	0	LDA
68	26	female	1	1	1	1	0	0	0	0	LDA	0	0	0	0	LDA
60	22	female	1	1	0	0	0.275	0	-0.025	0.275	EVN	0.05	0.125	0.075	0.134629	EVN
85	11	female	1	1	0	0	0.625	0.25	0.375	0.673146	LAR	0.125	0	0.125	0.125	EVN
75	38	male	0	0	0	0	0.375	0	0.375	0.375	LAR	0.5	0	0.5	0.5	LAR
69	11	male	0	0	0	0	0.5	0	0	0.5	EVN	0	0	0	0	LDA
84	1	female	0	0	0	1	0.375	0.5	0.875	0.625	LAR	0.25	2.08333	0.333333	2.09828	LAR
72	28	female	0	0	0	0	0	0	0	0	LDA	0	0	0	0	LDA
80	19	female	1	1	0	0	0	0	0	0	LDA	0	0	0	0	LDA
82	25	female	0	0	0	0	0	0	0	0	LDA	0	0	0	0	LDA
72	27	female	1	1	0	0	0.375	0	0.375	0.375	LAR	0	0	0	0	LDA
73	23	female	0	0	0	0	0	0	0	0	LDA	0	0	0	0	LDA
66	8	male	0	0	1	1	0.25	0	0.25	0.25	LAR	0	0.125	0.125	0.125	EVN
89	13	female	0	0	0	0	0	0.25	0.25	0.25	LAR	0	0.25	0.25	0.25	LAR
62	26	female	0	1	0	0	0.25	0.8	-0.55	0.838153	SML	1.025	1	-0.275	1.432	SML
72	17	female	0	0	0	0	0.25	0	0.25	0.25	LAR	0	0	0	0	LDA
73	24	female	1	1	0	0	0	0	0	0	LDA	0	0	0	0	LDA
73	24	female	0	0	0	0	0	0	0	0	LDA	0	0	0	0	LDA
64	24	female	1	1	0	0	0.425	0	-0.175	0.425	EVN	0	0	0	0	LDA
67	5	female	1	1	0	0	0	0	0	0	LDA	0	0	0	0	LDA
74	25	female	1	1	0	0	0	0.166667	0.166667	0.166667	EVN	0.125	0	0.125	0.125	EVN
75	8	female	1	1	0	0	0.15	0.333333	0.183333	0.365529	EVN	0.175	0	0.075	0.175	EVN
46	23	female	1	1	0	0	0.5	0.583333	1.08333	0.768295	LAR	0	0.416667	0.416667	0.416667	LAR
72	28	female	0	0	1	1	0	0	0	0	LDA	0	0	0	0	LDA
64	11	female	1	1	0	0	0.225	0	0.025	0.225	EVN	0.4	0	0.1	0.4	EVN
78	37	female	1	1	0	0	0	0	0	0	LDA	0.125	0.125	0.25	0.176777	LAR
61	29	female	0	0	1	1	0	0	0	0	LDA	0.1	0	-0.1	0.1	EVN
68	4	male	0	0	0	0	0	0	0	0	LDA	0	0	0	0	LDA
66	25	female	0	0	0	0	0.375	0.333333	0.708333	0.501733	LAR	0.25	0	0.25	0.25	LAR
73	23	female	1	1	0	0	0.475	0	0.275	0.475	LAR	0.575	0	0.175	0.575	EVN
88	35	female	1	1	0	0	0	0	0	0	LDA	0	0	0	0	LDA
70	32	female	1	1	0	0	0.475	0.125	0.4	0.491172	LAR	0.4	0.291667	0.391667	0.495045	LAR
66	23	female	0	0	1	1	0.25	0	0.25	0.25	LAR	0.25	0	0.25	0.25	LAR
86	5	female	0	0	0	0	0.45	0	0.05	0.45	EVN	0.125	0	0.125	0.125	EVN
71	23	female	1	1	0	0	0	0	0	0	LDA	0	0	0	0	LDA
66	11	female	1	1	0	0	0	0	0	0	LDA	0.15	0	-0.15	0.15	EVN
67	7	female	1	1	0	0	0	0	0	0	LDA	0	0	0	0	LDA
76	22	female	1	1	0	0	0	0.733333	0.733333	0.733333	LAR	0.125	0	0.125	0.125	EVN
78	28	female	0	0	0	0	0.25	0.375	0.625	0.450694	LAR	0.35	0.475	0.425	0.590021	LAR
51	15	female	1	1	1	1	0	0.125	0.125	0.125	EVN	0	0.125	0.125	0.125	EVN
70	6	female	1	1	0	0	0.175	0	0.075	0.175	EVN	0	0	0	0	LDA
61	43	female	0	0	0	0	0	0.333333	0.333333	0.333333	LAR	0	0.166667	0.166667	0.166667	EVN
71	41	female	0	0	0	0	0.05	0	-0.05	0.05	LDA	0	0	0	0	LDA
81	5	female	1	1	0	0	0	0	0	0	LDA	0	0	0	0	LDA
60	20	female	0	1	0	0	0.625	0.25	0.375	0.673146	LAR	0	0	0	0	LDA
56	10	female	1	1	0	0	0.125	0	0.125	0.125	EVN	0	0	0	0	LDA
46	11	female	1	1	0	0	0.375	0.3	0.075	0.480234	EVN	0.05	0.125	0.075	0.134629	EVN
75	23	male	1	1	0	0	0	0.125	0.125	0.125	EVN	0	0.25	0.25	0.25	LAR
73	29	female	0	0	0	0	0.175	0	0.075	0.175	EVN	0	0	0	0	LDA
71	11	male	1	1	0	0	0.333333	0.452381	0.785714	0.561925	LAR	0.25	0.416667	0.666667	0.485913	LAR
70	23	male	1	1	0	0	0	0	0	0	LDA	0	0	0	0	LDA
66	14	male	0	0	0	0	0	0	0	0	LDA	0	0	0	0	LDA
39	21	female	0	0	0	0	0	0	0	0	LDA	0	0	0	0	LDA
61	22	female	1	1	0	0	0.125	0	0.125	0.125	EVN	0.125	0	0.125	0.125	EVN
71	2	female	1	1	0	0	0.3	0	-0.3	0.3	SML	0.25	0	-0.25	0.25	SML
77	21	female	1	1	0	0	0.45	0	0.05	0.45	EVN	0.25	0	0.25	0.25	LAR
75	26	female	0	0	0	0	0	0.125	0.125	0.125	EVN	0	0	0	0	LDA
76	22	female	0	0	0	0	0	0	0	0	LDA	0	0	0	0	LDA
66	9	female	1	1	0	0	0.35	0	0.15	0.35	EVN	0.35	0.425	-0.025	0.550568	EVN
63	22	female	1	1	0	0	0	0	0	0	LDA	0	0	0	0	LDA
78	35	female	1	1	0	0	0	0	0	0	LDA	0	0	0	0	LDA
78	4	female	0	0	0	0	0.15	0	-0.15	0.15	EVN	0.175	0	0.075	0.175	EVN
70	1	female	1	1	0	0	0	0	0	0	LDA	0	0	0	0	LDA
87	23	female	1	1	0	0	0	0	0	0	LDA	0	0	0	0	LDA
83	15	male	0	0	0	0	0	0	0	0	LDA	0	0	0	0	LDA
80	22	female	0	0	0	1	0.475	0	0.275	0.475	LAR	0.1	0	-0.1	0.1	EVN
64	21	female	0	0	1	1	0.125	0.166667	0.291667	0.208333	LAR	0	0	0	0	LDA
73	24	female	1	1	0	0	0	0	0	0	LDA	0	0	0	0	LDA
71	33	female	0	0	0	0	0.625	0.25	0.875	0.673146	LAR	0	0	0	0	LDA
67	21	male	1	1	0	0	0.875	0.4	0.275	0.962094	LAR	0.3	0.25	0.45	0.390512	LAR
38	1	female	1	1	0	0	0	0	0	0	LDA	0.05	0.25	0.2	0.254951	EVN
67	37	female	1	1	1	1	0	0	0	0	LDA	0	0	0	0	LDA
77	14	male	1	1	0	0	0	0	0	0	LDA	0.8	0	0.2	0.8	EVN
57	38	female	0	0	0	0	0	0	0	0	LDA	0	0	0	0	LDA
72	29	female	1	1	0	0	0	0.125	0.125	0.125	EVN	0	0	0	0	LDA
70	36	female	1	1	0	0	0	0	0	0	LDA	0	0	0	0	LDA
56	26	female	1	1	0	0	0	0	0	0	LDA	0.125	0	0.125	0.125	EVN
58	29	female	1	1	1	1	0.285714	0	0.285714	0.285714	LAR	0	0	0	0	LDA
75	21	female	1	1	0	0	0	0	0	0	LDA	0	0	0	0	LDA
69	33	female	1	1	0	0	0	0	0	0	LDA	0.125	0	0.125	0.125	EVN
68	0	female	1	1	0	0	0	0	0	0	LDA	0	0	0	0	LDA
51	8	female	1	1	0	0	0.3	0	-0.3	0.3	SML	0.25	0.3	-0.55	0.390512	SML
77	21	female	0	0	1	1	0	0	0	0	LDA	0	0.125	0.125	0.125	EVN
82	26	female	0	0	0	0	0	0	0	0	LDA	0	0	0	0	LDA
57	7	female	1	1	0	0	0	0	0	0	LDA	0	0	0	0	LDA
68	4	female	1	1	0	0	0	0	0	0	LDA	0	0	0	0	LDA
66	22	male	1	1	0	0	0	0	0	0	LDA	0.375	0.125	0.5	0.395285	LAR
82	9	female	0	0	0	0	0	0	0	0	LDA	0	0	0	0	LDA
65	49	female	1	1	0	0	0.25	0.333333	0.583333	0.416667	LAR	0.05	0.25	0.2	0.254951	EVN
75	3	male	1	1	0	0	0.05	0	-0.05	0.05	LDA	0	0	0	0	LDA
83	43	female	0	0	0	0	0.125	0	0.125	0.125	EVN	0.5	0.125	0.625	0.515388	LAR
34	21	female	0	0	1	1	0.1	0.125	0.025	0.160078	EVN	0	0	0	0	LDA
71	40	female	1	1	0	0	0.125	0	0.125	0.125	EVN	0	0	0	0	LDA
63	12	female	1	1	0	0	0.2	0	-0.2	0.2	SML	1	0	0	1	EVN
72	47	female	0	0	0	0	0	0	0	0	LDA	0	0	0	0	LDA
44	23	female	1	1	0	0	0.125	0.125	0.25	0.176777	LAR	0.5	0.375	0.875	0.625	LAR
70	22	female	0	0	0	0	0	0.285714	0.285714	0.285714	LAR	0	0	0	0	LDA
67	21	female	1	1	0	0	0.125	0	0.125	0.125	EVN	0.05	0	-0.05	0.05	LDA
86	20	female	0	0	0	0	0	0	0	0	LDA	0	0	0	0	LDA
63	20	female	1	0	0	0	0	0	0	0	LDA	0	0	0	0	LDA
73	34	female	1	1	0	0	0.725	0.342857	0.467857	0.801983	LAR	0.55	0.225	0.475	0.594243	LAR
79	28	female	1	1	0	0	0.15	0	-0.15	0.15	EVN	0	0.25	0.25	0.25	LAR
62	21	female	1	1	0	0	0	0	0	0	LDA	0	0	0	0	LDA
53	20	male	0	0	0	1	0.125	0.125	0.25	0.176777	LAR	0	0	0	0	LDA
72	3	female	0	0	0	0	0.125	0.125	0.25	0.176777	LAR	0.125	0.125	0.25	0.176777	LAR
52	0	female	0	0	0	0	0	0	0	0	LDA	0	0	0	0	LDA
38	34	female	1	1	1	1	0	0	0	0	LDA	0	0	0	0	LDA
73	19	female	0	0	0	0	0	0.291667	0.291667	0.291667	LAR	0	0.291667	0.291667	0.291667	LAR
72	17	female	1	1	0	0	0	0	0	0	LDA	0	0	0	0	LDA
64	21	female	0	0	0	0	0.125	0	0.125	0.125	EVN	0.125	0	0.125	0.125	EVN
65	26	female	1	1	0	0	0	0	0	0	LDA	0	0	0	0	LDA
76	20	female	0	0	0	1	0.25	0.333333	0.583333	0.416667	LAR	1.1	0.25	0.15	1.12805	EVN
61	20	female	1	1	0	0	0	0.5	0.5	0.5	LAR	0	0.25	0.25	0.25	LAR
81	41	female	1	1	0	0	0	0	0	0	LDA	0	0	0	0	LDA
74	28	female	1	1	0	0	0	0	0	0	LDA	0	0	0	0	LDA
75	1	female	0	0	0	0	0.65	0	-0.15	0.65	EVN	0.1	0	-0.1	0.1	EVN
62	21	female	1	1	1	1	0	0	0	0	LDA	0	0	0	0	LDA
67	16	female	1	1	1	1	0.125	0	0.125	0.125	EVN	0.125	0	0.125	0.125	EVN
61	46	female	0	1	1	0	0	0	0	0	LDA	0	0	0	0	LDA
55	2	female	0	0	0	0	0.25	0	0.25	0.25	LAR	0	0	0	0	LDA
57	1	female	1	1	0	0	0	0	0	0	LDA	0	0.1	-0.1	0.1	EVN
57	4	female	1	1	0	1	0.8	0	0.2	0.8	EVN	0	0	0	0	LDA
83	19	female	1	1	0	0	0	0.25	0.25	0.25	LAR	0	0	0	0	LDA
43	20	female	0	0	0	0	0.375	0.333333	0.708333	0.501733	LAR	0.25	0.166667	0.416667	0.300463	LAR
65	20	female	1	1	0	0	0.125	0	0.125	0.125	EVN	0.25	0	0.25	0.25	LAR
67	25	female	0	0	1	1	0.25	0	0.25	0.25	LAR	0.25	0	0.25	0.25	LAR
71	20	female	0	0	0	0	0.25	0	0.25	0.25	LAR	0.35	0	0.15	0.35	EVN
68	23	male	0	0	0	0	0	0	0	0	LDA	0	0	0	0	LDA
78	2	female	0	0	0	0	0.15	0	-0.15	0.15	EVN	0	0	0	0	LDA
68	20	female	1	1	0	0	0	0	0	0	LDA	0.125	0	0.125	0.125	EVN
67	19	female	1	1	1	1	0.15	0	-0.15	0.15	EVN	0	0	0	0	LDA
56	21	female	1	1	1	1	0	0	0	0	LDA	0	0	0	0	LDA
64	0	female	1	1	0	0	2	0.516667	1.31667	2.06566	LAR	0.05	0	-0.05	0.05	LDA
71	22	female	1	1	0	0	0.125	0	0.125	0.125	EVN	0.125	0	0.125	0.125	EVN
76	30	female	1	1	0	0	0	0	0	0	LDA	0	0	0	0	LDA
72	19	female	0	0	1	1	0	0	0	0	LDA	0.25	0	0.25	0.25	LAR
71	9	male	1	0	0	0	0	0	0	0	LDA	0	0.125	0.125	0.125	EVN
74	19	female	1	1	0	0	0.2	0	-0.2	0.2	SML	0	0	0	0	LDA
72	20	female	0	0	1	1	0	0	0	0	LDA	0	0.166667	0.166667	0.166667	EVN
72	21	female	1	1	1	1	0	0	0	0	LDA	0	0	0	0	LDA
79	25	male	0	0	0	0	0.125	0.25	0.375	0.279508	LAR	0.25	0.125	0.375	0.279508	LAR
72	21	female	0	0	0	0	0	0	0	0	LDA	0	0	0	0	LDA
72	42	female	1	1	0	0	0	0.2	0.2	0.2	LAR	0	0	0	0	LDA
60	19	female	0	0	0	0	0	0	0	0	LDA	0	0	0	0	LDA
50	19	female	0	0	1	1	0	0.166667	0.166667	0.166667	EVN	0	0.125	0.125	0.125	EVN
81	28	female	1	1	0	0	0	0.2	0.2	0.2	LAR	0	0.375	0.375	0.375	LAR
73	12	female	0	0	0	0	0	0	0	0	LDA	0	0	0	0	LDA
73	23	female	1	1	0	0	0	0	0	0	LDA	0.3	0	-0.3	0.3	SML
71	25	female	1	1	1	1	0.125	0.125	0.25	0.176777	LAR	0	0.125	0.125	0.125	EVN
59	22	female	1	1	0	0	0	0	0	0	LDA	0	0	0	0	LDA
81	18	female	1	1	0	0	0	0	0	0	LDA	0	0	0	0	LDA
77	19	female	1	0	0	0	0	0	0	0	LDA	0.75	0.541667	0.791667	0.92515	LAR
72	20	female	0	0	0	1	0	0	0	0	LDA	0	0	0	0	LDA
80	7	female	0	0	0	0	0	0	0	0	LDA	0	0	0	0	LDA
64	19	male	1	1	0	0	0.25	0	0.25	0.25	LAR	0	0	0	0	LDA
72	18	female	1	1	0	0	0.05	0	-0.05	0.05	LDA	0.05	0.1	-0.15	0.111803	EVN
72	18	female	1	1	0	0	0.175	0	0.075	0.175	EVN	0.05	0	-0.05	0.05	LDA
49	2	female	1	1	0	0	0.1	0	-0.1	0.1	EVN	0.25	0.125	0.375	0.279508	LAR
68	29	female	1	1	0	0	0	0	0	0	LDA	0	0	0	0	LDA
71	27	female	1	1	0	0	0	0	0	0	LDA	0	0	0	0	LDA
61	0	female	1	1	0	0	0.1	0	-0.1	0.1	EVN	0	0	0	0	LDA
69	14	female	1	1	0	0	0	0	0	0	LDA	0	0	0	0	LDA
67	43	female	0	0	1	1	0	0	0	0	LDA	0.125	0	0.125	0.125	EVN
53	13	female	0	0	0	1	0.125	0.166667	0.291667	0.208333	LAR	0.25	0.166667	0.416667	0.300463	LAR
71	48	female	1	1	0	0	0.95	0.309524	0.359524	0.999152	LAR	0.275	0	-0.025	0.275	EVN
49	3	female	1	1	0	0	0.375	0	0.375	0.375	LAR	0	0	0	0	LDA
77	1	male	0	0	0	0	0	0	0	0	LDA	0	0	0	0	LDA
74	8	female	0	0	1	1	1	0.833333	1.83333	1.30171	LAR	0.75	0.833333	1.58333	1.12114	LAR
66	1	female	0	1	0	0	0	0.166667	0.166667	0.166667	EVN	0	0	0	0	LDA
73	18	female	0	0	0	0	0	0	0	0	LDA	0.15	0	-0.15	0.15	EVN
45	19	female	1	1	0	0	0.225	0	0.025	0.225	EVN	0.05	0	-0.05	0.05	LDA
78	33	male	1	1	0	0	0	0.125	0.125	0.125	EVN	0	0	0	0	LDA
69	17	female	1	1	0	0	0	0	0	0	LDA	0.15	0.291667	0.141667	0.327978	EVN
56	25	female	1	1	0	0	0.05	0	-0.05	0.05	LDA	0	0	0	0	LDA
50	7	female	1	1	1	1	0.225	0	0.025	0.225	EVN	0.05	0	-0.05	0.05	LDA
67	18	female	0	0	0	0	0.35	0.166667	-0.183333	0.387657	EVN	0	0	0	0	LDA
58	18	female	1	1	0	0	0.375	0	0.375	0.375	LAR	0.125	0	0.125	0.125	EVN
65	11	female	1	1	0	0	0.2	0.125	-0.075	0.23585	EVN	0.25	0.125	-0.125	0.279508	EVN
67	9	female	1	1	0	0	0	0	0	0	LDA	0	0	0	0	LDA
62	52	female	0	0	0	0	0	0	0	0	LDA	0	0	0	0	LDA
56	18	female	1	1	0	0	0	0.25	0.25	0.25	LAR	0.25	0	0.25	0.25	LAR
64	14	female	0	0	0	0	0.25	0	-0.25	0.25	SML	0.7	0.291667	0.0916667	0.758333	EVN
69	12	female	0	0	1	0	0.55	0.25	0.7	0.604152	LAR	0.35	0.25	0.4	0.430116	LAR
53	1	female	1	1	0	0	0.05	0	-0.05	0.05	LDA	0.05	0	-0.05	0.05	LDA
66	17	female	1	1	0	0	0	0	0	0	LDA	0.275	0	-0.025	0.275	EVN
67	37	female	1	1	0	0	0	0	0	0	LDA	0	0	0	0	LDA
45	13	female	1	1	1	1	0.55	0	-0.55	0.55	SML	0.3	0	-0.3	0.3	SML
50	18	female	1	1	0	0	0	0	0	0	LDA	0.1	0.225	-0.075	0.246221	EVN
80	31	female	1	1	0	0	0	0	0	0	LDA	0	0	0	0	LDA
71	46	female	1	1	0	0	0.166667	0	0.166667	0.166667	EVN	0	0	0	0	LDA
36	17	male	1	1	0	0	0	0	0	0	LDA	0	0	0	0	LDA
84	31	female	0	0	0	0	0	0	0	0	LDA	0	0	0	0	LDA
66	19	female	0	0	0	0	0.1	0.125	0.025	0.160078	EVN	0.1	0	-0.1	0.1	EVN
70	17	female	1	0	0	0	0	0	0	0	LDA	0	0	0	0	LDA
67	10	female	1	1	0	0	0.25	0	0.25	0.25	LAR	0	0	0	0	LDA
75	17	female	0	0	1	1	0.125	0	0.125	0.125	EVN	0.475	0.125	0.4	0.491172	LAR
79	17	female	0	0	0	0	0	0	0	0	LDA	0.25	0	0.25	0.25	LAR
76	26	female	1	1	0	0	0.125	0	0.125	0.125	EVN	0.125	0	0.125	0.125	EVN
82	23	female	0	0	1	1	0	0	0	0	LDA	0	0	0	0	LDA
61	40	female	0	1	0	0	0	0	0	0	LDA	0.25	0	0.25	0.25	LAR
69	43	female	1	1	0	0	0	0	0	0	LDA	0.05	0	-0.05	0.05	LDA
73	19	male	1	1	0	0	0	0.291667	0.291667	0.291667	LAR	0	0.291667	0.291667	0.291667	LAR
55	18	female	1	1	0	0	0.9	0	0.1	0.9	EVN	0.25	0	0.25	0.25	LAR
69	19	female	1	1	0	0	0	0	0	0	LDA	0	0	0	0	LDA
73	30	female	1	1	1	1	0	0	0	0	LDA	0.125	0	0.125	0.125	EVN
72	27	female	0	0	0	0	0.25	0.47619	0.72619	0.537827	LAR	1.3	0.833333	1.53333	1.54416	LAR
61	17	female	1	1	0	0	0	0	0	0	LDA	0	0.125	0.125	0.125	EVN
70	18	male	1	1	0	0	1.15	0.25	0.6	1.17686	LAR	1.25	0.25	1.5	1.27475	LAR
76	18	female	1	1	0	0	0	0	0	0	LDA	0	0	0	0	LDA
62	16	female	1	1	0	0	0	0.166667	0.166667	0.166667	EVN	0	0.166667	0.166667	0.166667	EVN
46	17	female	1	1	0	0	0	0	0	0	LDA	0.125	0	0.125	0.125	EVN
62	30	female	0	0	0	0	0.4	0	0.1	0.4	EVN	0.175	0	0.075	0.175	EVN
50	30	female	1	1	0	0	0.35	0.125	-0.225	0.371652	SML	0	0	0	0	LDA
41	19	female	1	1	0	0	0.3	0	-0.3	0.3	SML	0	0	0	0	LDA
62	13	female	1	1	0	0	0.125	0.125	0.25	0.176777	LAR	0	0	0	0	LDA
67	6	female	1	1	0	0	0.35	0	0.15	0.35	EVN	0	0	0	0	LDA
65	57	female	0	0	0	0	0.25	0.125	0.375	0.279508	LAR	0.25	0.25	0.5	0.353553	LAR
74	16	female	1	1	0	0	0	0	0	0	LDA	0.125	0	0.125	0.125	EVN
77	6	female	0	0	1	1	0.375	0	0.375	0.375	LAR	0	0	0	0	LDA
44	19	female	0	0	0	0	0	0.125	0.125	0.125	EVN	0	0	0	0	LDA
82	25	female	0	0	0	0	0.125	0.125	0.25	0.176777	LAR	0.125	0.125	0.25	0.176777	LAR
67	17	female	0	0	0	0	0.175	0	0.075	0.175	EVN	0.35	0	0.15	0.35	EVN
86	21	female	0	0	0	0	0.2	0.125	-0.075	0.23585	EVN	0.975	0.25	0.525	1.00654	LAR
72	40	female	0	0	0	0	0	0	0	0	LDA	0	0	0	0	LDA
46	25	female	1	1	0	0	0.675	0.166667	0.241667	0.695272	LAR	0.575	0	0.175	0.575	EVN
64	35	female	1	1	0	0	0	0	0	0	LDA	0.125	0.375	0.5	0.395285	LAR
44	2	female	0	0	0	0	0	0.125	0.125	0.125	EVN	0	0	0	0	LDA
77	21	male	0	0	0	0	0	0.1	-0.1	0.1	EVN	0	0	0	0	LDA
69	16	male	1	1	1	1	0	0	0	0	LDA	0	0	0	0	LDA
73	33	female	1	1	0	0	0	1	-1	1	SML	0	0	0	0	LDA
62	2	female	1	1	0	0	0	0	0	0	LDA	0.25	0	0.25	0.25	LAR
70	37	female	1	1	0	0	0	0	0	0	LDA	0	0	0	0	LDA
68	16	female	0	0	1	0	0.7	0	0.3	0.7	LAR	0.35	0	0.15	0.35	EVN
40	4	female	1	1	1	1	0.15	0	-0.15	0.15	EVN	0.175	0	0.075	0.175	EVN
68	6	female	1	1	0	0	0.2	0	-0.2	0.2	SML	0	0	0	0	LDA
55	28	female	1	1	0	0	0.125	0	0.125	0.125	EVN	0.3	0	0.2	0.3	EVN
61	21	female	0	0	1	1	0	0	0	0	LDA	0.6	0	0.4	0.6	LAR
65	17	female	0	0	0	0	0	0	0	0	LDA	0	0	0	0	LDA
64	33	female	1	1	0	0	0	0	0	0	LDA	0.25	0	0.25	0.25	LAR
55	16	male	1	1	0	0	0.25	0.125	0.375	0.279508	LAR	0.425	0.475	0.6	0.637377	LAR
77	37	female	1	1	0	0	0	0	0	0	LDA	0	0	0	0	LDA
68	16	female	0	0	1	1	0.75	0.125	0.875	0.760345	LAR	0.25	0.125	0.375	0.279508	LAR
72	16	female	1	1	1	1	0	0	0	0	LDA	0	0	0	0	LDA
59	17	male	1	1	0	0	0.15	0	-0.15	0.15	EVN	0.15	0	-0.15	0.15	EVN
71	16	female	0	0	0	0	0	0	0	0	LDA	0	0	0	0	LDA
51	16	female	0	0	0	0	0	0	0	0	LDA	0	0	0	0	LDA
93	23	female	0	0	0	0	0	0	0	0	LDA	0	0	0	0	LDA
58	8	female	1	1	0	0	0	0	0	0	LDA	0	0	0	0	LDA
67	16	female	0	0	1	1	0	0.142857	0.142857	0.142857	EVN	0	0	0	0	LDA
51	16	female	1	1	0	0	0.125	0	0.125	0.125	EVN	0.5	0	0.5	0.5	LAR
77	38	female	1	1	0	0	0	0	0	0	LDA	0	0	0	0	LDA
70	16	female	1	1	0	0	0.05	0.25	0.2	0.254951	EVN	0.35	0	0.15	0.35	EVN
53	15	female	1	1	0	0	0	0	0	0	LDA	0.25	0	0.25	0.25	LAR
58	17	female	1	1	0	0	0	0	0	0	LDA	0	0	0	0	LDA
72	16	male	0	0	0	0	0.175	0	0.075	0.175	EVN	0.475	0	0.275	0.475	LAR
71	11	female	0	0	1	1	0.125	0	0.125	0.125	EVN	0.25	0	0.25	0.25	LAR
70	20	female	0	0	0	0	0	0	0	0	LDA	0.425	0	0.325	0.425	LAR
36	15	female	1	1	1	1	0.3	0.452381	0.652381	0.542815	LAR	0.375	0.291667	0.666667	0.475073	LAR
53	23	female	0	0	0	0	0	0	0	0	LDA	0.1	0	-0.1	0.1	EVN
65	10	female	1	1	0	0	0.125	0.142857	0.267857	0.189824	LAR	0	0.125	0.125	0.125	EVN
72	14	female	1	1	0	0	0	0	0	0	LDA	0	0	0	0	LDA
63	27	male	1	1	1	1	0.25	0.2	0.05	0.320156	EVN	0.125	0.125	0.25	0.176777	LAR
64	15	female	1	1	0	0	0	0	0	0	LDA	0	0	0	0	LDA
71	18	female	1	1	0	0	0	0	0	0	LDA	0	0	0	0	LDA
69	22	female	1	1	0	0	0.05	0	-0.05	0.05	LDA	0	0	0	0	LDA
69	15	male	0	0	0	0	0.125	0	0.125	0.125	EVN	0	0	0	0	LDA
72	18	male	1	1	0	0	0	0.25	0.25	0.25	LAR	0.125	0.25	0.375	0.279508	LAR
81	28	female	1	1	0	0	0	1.125	-0.875	1.125	SML	0	1.125	-0.875	1.125	SML
85	15	female	1	1	0	0	1.925	0.8	0.525	2.08462	LAR	1.55	1.03333	1.08333	1.86287	LAR
76	16	female	1	1	0	0	0	0	0	0	LDA	0	0	0	0	LDA
74	44	female	1	1	0	0	0.285714	0	0.285714	0.285714	LAR	0.125	0	0.125	0.125	EVN
76	15	female	1	1	0	0	0	0	0	0	LDA	0	0	0	0	LDA
59	17	female	1	1	0	0	0	0	0	0	LDA	0	0	0	0	LDA
73	15	female	1	1	0	0	0.25	0	0.25	0.25	LAR	0.1	0	-0.1	0.1	EVN
66	15	female	1	1	0	0	0.25	0	0.25	0.25	LAR	0.375	0	0.375	0.375	LAR
64	15	female	0	0	0	0	0	0	0	0	LDA	0	0	0	0	LDA
52	15	female	1	1	0	0	0	0.4	-0.4	0.4	SML	0	0	0	0	LDA
63	15	female	0	0	0	0	0.475	0	0.275	0.475	LAR	0.225	0	0.025	0.225	EVN
69	15	female	0	0	0	0	0.05	0	-0.05	0.05	LDA	0.05	0	-0.05	0.05	LDA
71	32	female	0	0	0	0	0	0	0	0	LDA	0	0	0	0	LDA
66	15	female	1	1	0	0	0.225	0	0.025	0.225	EVN	0	0.125	0.125	0.125	EVN
58	31	female	1	1	0	0	0.25	0.25	0.5	0.353553	LAR	0	0	0	0	LDA
72	17	male	1	1	0	0	0.5	0.5	1	0.707107	LAR	0	0	0	0	LDA
57	29	female	0	0	0	0	0.4	0.166667	-0.233333	0.433333	SML	0.3	0	-0.3	0.3	SML
78	33	female	1	1	0	0	0	0.166667	0.166667	0.166667	EVN	0	0.166667	0.166667	0.166667	EVN
72	15	male	0	0	0	0	0.85	0	0.65	0.85	LAR	0	0	0	0	LDA
66	31	female	1	1	0	0	0.05	0.125	0.075	0.134629	EVN	0.05	0	-0.05	0.05	LDA
72	11	female	0	0	0	0	0.05	0	-0.05	0.05	LDA	0	0	0	0	LDA
78	16	female	0	0	0	0	0	0	0	0	LDA	0	0	0	0	LDA
80	45	female	1	1	0	0	0	1	-1	1	SML	0	0	0	0	LDA
75	14	female	1	1	1	1	0.15	0	-0.15	0.15	EVN	0	0	0	0	LDA
70	51	female	1	1	0	0	0	0	0	0	LDA	0.25	0	0.25	0.25	LAR
72	14	male	0	0	0	0	0.05	0	-0.05	0.05	LDA	0	0	0	0	LDA
69	15	female	1	1	0	0	0	0	0	0	LDA	0	0	0	0	LDA
73	19	female	0	0	0	0	0	0	0	0	LDA	0.325	0	-0.075	0.325	EVN
64	39	female	1	1	1	1	0.25	0	0.25	0.25	LAR	0.125	0	0.125	0.125	EVN
78	15	female	1	1	0	0	0.25	0	0.25	0.25	LAR	0	0.125	0.125	0.125	EVN
64	16	female	1	1	0	0	0.7	0	0.3	0.7	LAR	0.4	0	0.1	0.4	EVN
70	23	female	1	1	0	0	0	0.2	-0.2	0.2	SML	0.25	0.391667	0.441667	0.464653	LAR
69	21	female	1	1	0	0	0	0.166667	0.166667	0.166667	EVN	0	0.125	0.125	0.125	EVN
75	14	male	0	0	0	0	0.35	0	-0.35	0.35	SML	0.15	0	-0.15	0.15	EVN
63	7	female	1	1	0	0	0.15	0.291667	0.141667	0.327978	EVN	0.3	0.125	-0.175	0.325	EVN
62	3	male	1	1	0	0	0	0	0	0	LDA	0	0	0	0	LDA
38	14	female	0	0	1	1	0	0	0	0	LDA	0	0	0	0	LDA
73	44	female	1	1	0	0	0	0	0	0	LDA	0	0	0	0	LDA
70	8	female	1	1	0	0	0	0	0	0	LDA	0	0	0	0	LDA
60	11	female	0	0	1	1	0	0	0	0	LDA	0	0	0	0	LDA
73	30	male	0	0	1	1	0	0	0	0	LDA	0	0	0	0	LDA
40	5	female	0	0	0	0	0.25	0.125	0.375	0.279508	LAR	0.35	0.2	-0.05	0.403113	EVN
68	31	female	1	1	0	0	0.125	0.2	-0.075	0.23585	EVN	0.125	0.1	0.025	0.160078	EVN
72	16	female	1	1	0	0	0	0	0	0	LDA	0	0	0	0	LDA
46	3	female	1	1	0	0	0.375	0	0.375	0.375	LAR	1.1	1.58333	-0.516667	1.92794	SML
84	15	female	0	0	1	1	0	0	0	0	LDA	0	0	0	0	LDA
72	15	female	0	1	0	0	0.25	0	0.25	0.25	LAR	0.125	0	0.125	0.125	EVN
53	16	female	1	1	0	0	0	0	0	0	LDA	0	0	0	0	LDA
71	31	female	0	0	1	1	0	0	0	0	LDA	0	0	0	0	LDA
73	17	female	0	0	0	0	0	0	0	0	LDA	0	0	0	0	LDA
71	17	female	1	1	0	0	0.225	0.25	0.275	0.336341	LAR	0.375	0	0.375	0.375	LAR
57	10	male	1	1	0	0	0	0	0	0	LDA	0.25	0	0.25	0.25	LAR
59	15	male	1	1	0	0	0.125	0	0.125	0.125	EVN	0	0	0	0	LDA
60	14	female	1	1	0	0	0	0	0	0	LDA	0.125	0	0.125	0.125	EVN
67	22	female	1	1	0	0	0.25	0	0.25	0.25	LAR	0.375	0	0.375	0.375	LAR
61	15	female	0	0	0	0	0.175	0	0.075	0.175	EVN	0.25	0	0.25	0.25	LAR
51	10	female	1	1	0	0	0	0	0	0	LDA	0	0.5	-0.5	0.5	SML
79	17	female	1	1	1	1	0	0	0	0	LDA	0	0	0	0	LDA
63	14	female	1	1	0	0	0.1	0	-0.1	0.1	EVN	0	0	0	0	LDA
69	39	female	0	0	0	0	0.775	0.4	-0.025	0.872138	EVN	0.475	0.125	0.4	0.491172	LAR
70	20	female	0	0	1	1	0	0	0	0	LDA	0	0	0	0	LDA
71	14	female	1	1	0	0	0	0.166667	0.166667	0.166667	EVN	0	0	0	0	LDA
75	18	male	1	1	0	0	0.45	0.5	-0.45	0.672681	SML	0.125	1	-0.875	1.00778	SML
50	14	male	0	0	0	0	0	0	0	0	LDA	0	0	0	0	LDA
83	21	female	1	1	0	0	0.166667	0	0.166667	0.166667	EVN	0.4	0.125	-0.275	0.419076	SML
66	15	female	1	1	0	0	0	0.125	0.125	0.125	EVN	0.125	0	0.125	0.125	EVN
52	24	female	1	1	0	0	0.175	0	0.075	0.175	EVN	0.125	0	0.125	0.125	EVN
63	14	female	1	1	0	0	0	0	0	0	LDA	0	0.125	0.125	0.125	EVN
65	15	male	0	0	0	0	0	0	0	0	LDA	0	0	0	0	LDA
64	14	female	1	1	0	0	0	0.375	0.375	0.375	LAR	0.4	0	0.1	0.4	EVN
69	20	female	1	1	1	1	0	0	0	0	LDA	0	0	0	0	LDA
49	16	female	0	1	0	0	0	0.125	0.125	0.125	EVN	0.125	0.125	0.25	0.176777	LAR
46	23	female	1	1	0	0	0.25	0	0.25	0.25	LAR	0	0	0	0	LDA
71	14	female	1	1	0	0	0.333333	0.166667	0.5	0.372678	LAR	0.25	0.291667	0.0416667	0.384148	EVN
60	14	female	1	1	0	0	0	0.125	0.125	0.125	EVN	0	0.125	0.125	0.125	EVN
78	20	female	1	1	0	0	0	0	0	0	LDA	0	0	0	0	LDA
42	4	female	1	1	0	0	0.05	0	-0.05	0.05	LDA	0.05	0.25	0.2	0.254951	EVN
69	15	female	0	0	0	0	0	0	0	0	LDA	0	0	0	0	LDA
71	14	female	1	1	0	0	0	0	0	0	LDA	0	0	0	0	LDA
78	28	female	1	1	0	0	0	0	0	0	LDA	0	0	0	0	LDA
67	18	female	1	1	1	1	0.485714	0	0.0857143	0.485714	EVN	0.375	0	0.375	0.375	LAR
69	14	female	1	1	0	0	0	0	0	0	LDA	0.05	0	-0.05	0.05	LDA
46	18	female	1	1	1	1	0	0	0	0	LDA	0.1	0	-0.1	0.1	EVN
57	19	female	1	0	0	0	0.2	0	-0.2	0.2	SML	0.25	0	-0.25	0.25	SML
54	14	female	1	1	0	0	0.5	0.25	0.75	0.559017	LAR	0	0	0	0	LDA
75	13	male	1	1	0	0	0	0	0	0	LDA	0	0	0	0	LDA
64	14	female	0	0	0	0	0.125	0	0.125	0.125	EVN	0	0	0	0	LDA
75	14	female	1	1	0	0	0	0	0	0	LDA	0	0	0	0	LDA
48	27	female	0	0	0	0	0.25	0	0.25	0.25	LAR	0.125	0	0.125	0.125	EVN
52	14	male	1	1	0	0	0.125	0	0.125	0.125	EVN	0	0	0	0	LDA
66	13	female	1	1	0	0	0	0.733333	0.733333	0.733333	LAR	0	0	0	0	LDA
42	13	female	1	1	0	0	0	0	0	0	LDA	0	0	0	0	LDA
63	15	female	0	0	1	1	0.375	0	-0.125	0.375	EVN	0.4	0	-0.4	0.4	SML
74	25	female	1	1	0	0	0.125	0	0.125	0.125	EVN	0	0	0	0	LDA
71	12	female	1	1	0	0	0	0	0	0	LDA	0.05	0	-0.05	0.05	LDA
63	22	female	1	1	1	1	0	0.125	0.125	0.125	EVN	0.125	0	0.125	0.125	EVN
63	15	female	1	1	0	0	0	0	0	0	LDA	0	0	0	0	LDA
67	32	female	0	0	0	1	0.575	0.45	0.225	0.730154	LAR	0.25	0	0.25	0.25	LAR
66	5	male	1	1	0	0	0	0	0	0	LDA	0	0	0	0	LDA
74	14	female	0	0	0	1	0.5	0	0.5	0.5	LAR	0	0	0	0	LDA
47	11	female	0	0	0	0	0	0	0	0	LDA	0	0	0	0	LDA
65	22	female	0	0	0	0	0.1	0	-0.1	0.1	EVN	0	0	0	0	LDA
75	16	female	1	1	0	0	0.25	0.166667	0.416667	0.300463	LAR	0.25	0	0.25	0.25	LAR
67	16	female	0	0	0	0	0.675	0.125	-0.3	0.686477	SML	0	0	0	0	LDA
72	15	female	1	1	1	1	0	0.333333	0.333333	0.333333	LAR	0	0.125	0.125	0.125	EVN
48	13	female	0	1	0	0	0.35	0	0.15	0.35	EVN	0.35	0.25	0.4	0.430116	LAR
71	14	female	0	0	1	1	0.05	0	-0.05	0.05	LDA	0	0	0	0	LDA
50	15	female	1	1	0	0	0.125	0	0.125	0.125	EVN	0	0	0	0	LDA
41	3	female	1	1	0	0	0	0	0	0	LDA	0.125	0	0.125	0.125	EVN
82	19	female	0	0	0	0	0	0.285714	0.285714	0.285714	LAR	0	0	0	0	LDA
48	13	female	0	0	0	0	0	0	0	0	LDA	0	0	0	0	LDA
66	14	female	0	0	0	0	0	0.25	0.25	0.25	LAR	0	0.125	0.125	0.125	EVN
67	16	female	0	0	1	1	0	0	0	0	LDA	0.15	0	-0.15	0.15	EVN
41	4	male	1	1	1	1	0	0	0	0	LDA	0	0	0	0	LDA
60	29	female	1	1	0	0	0	0.1	-0.1	0.1	EVN	0	0.575	0.175	0.575	EVN
67	40	female	0	0	0	0	0.125	0	0.125	0.125	EVN	0	0	0	0	LDA
80	13	male	0	0	0	0	0.125	0	0.125	0.125	EVN	0	0	0	0	LDA
63	14	female	1	1	1	1	0	0	0	0	LDA	0.25	0	0.25	0.25	LAR
67	14	female	0	0	0	0	0.25	0	0.25	0.25	LAR	0.25	0	0.25	0.25	LAR
73	13	female	1	1	0	0	0.75	0.583333	1.33333	0.950146	LAR	0.25	0	0.25	0.25	LAR
65	12	female	1	1	0	0	0.3	0.125	0.325	0.325	LAR	0.375	0.675	0.45	0.772172	LAR
60	31	female	1	1	0	0	0	0	0	0	LDA	0	0.166667	0.166667	0.166667	EVN
71	13	female	1	1	1	1	0	0	0	0	LDA	0.125	0	0.125	0.125	EVN
70	39	female	0	0	0	0	0	0	0	0	LDA	0	0	0	0	LDA
83	33	female	0	0	0	0	0.875	0.166667	0.541667	0.890732	LAR	0.625	0	0.125	0.625	EVN
68	43	female	0	0	0	0	0	0	0	0	LDA	0	0.333333	0.333333	0.333333	LAR
66	14	female	0	0	0	0	0.375	0	0.375	0.375	LAR	0.5	0	0.5	0.5	LAR
77	13	female	0	0	0	0	0	0	0	0	LDA	0	0	0	0	LDA
65	13	male	1	1	0	0	0.5	0.142857	0.142857	0.520008	EVN	0	0.125	0.125	0.125	EVN
67	4	female	0	0	0	0	0.375	0.291667	0.666667	0.475073	LAR	0.5	0	0.5	0.5	LAR
58	13	female	1	1	0	0	0	0	0	0	LDA	0.375	0	0.375	0.375	LAR
68	14	male	0	0	1	1	0	0.25	0.25	0.25	LAR	0	0.25	0.25	0.25	LAR
76	13	female	0	0	0	0	0.125	0	0.125	0.125	EVN	0	0	0	0	LDA
71	17	female	1	0	1	1	0	0	0	0	LDA	0	0	0	0	LDA
70	13	male	0	0	0	0	0	0	0	0	LDA	0.125	0	0.125	0.125	EVN
50	5	female	0	0	0	0	0	0.25	0.25	0.25	LAR	0	0.125	0.125	0.125	EVN
80	27	female	1	1	0	0	0.25	0	0.25	0.25	LAR	0.6	0	0.4	0.6	LAR
62	22	female	0	0	0	0	0.621429	0	0.521429	0.621429	LAR	0.25	0	0.25	0.25	LAR
48	12	female	1	1	0	0	0	0	0	0	LDA	0	0	0	0	LDA
64	23	female	1	1	0	0	0	0	0	0	LDA	0	0	0	0	LDA
69	23	female	1	1	0	0	0.125	0	0.125	0.125	EVN	0	0	0	0	LDA
70	13	female	1	1	0	0	0	0	0	0	LDA	0	0	0	0	LDA
74	32	female	1	1	0	0	0	0	0	0	LDA	0	0	0	0	LDA
78	31	female	1	0	0	0	0.5	0.25	0.75	0.559017	LAR	0	0	0	0	LDA
68	14	male	1	1	0	0	0	0.166667	0.166667	0.166667	EVN	0	0	0	0	LDA
54	12	female	0	0	0	0	0.25	0	0.25	0.25	LAR	0.6	0	0.4	0.6	LAR
73	28	female	1	1	0	0	0.4	0	-0.4	0.4	SML	0.4	0	-0.4	0.4	SML
78	14	female	1	1	0	0	0	0	0	0	LDA	0	0	0	0	LDA
85	12	male	1	0	0	0	0	0	0	0	LDA	0	0	0	0	LDA
75	13	female	1	1	0	0	0.25	0.25	0.5	0.353553	LAR	0.1	0	-0.1	0.1	EVN
72	30	female	1	1	0	0	0	0	0	0	LDA	0	0	0	0	LDA
66	14	female	1	1	0	0	0	0.25	0.25	0.25	LAR	0	0	0	0	LDA
76	12	female	1	1	0	0	0.25	0.125	0.375	0.279508	LAR	0	0.125	0.125	0.125	EVN
62	12	female	0	0	0	0	0	0	0	0	LDA	0.125	0	0.125	0.125	EVN
47	12	female	0	0	0	0	0.1	0	-0.1	0.1	EVN	0	0	0	0	LDA
64	12	female	1	1	0	0	0.05	0	-0.05	0.05	LDA	0.4	0	0.1	0.4	EVN
37	12	female	1	1	0	0	0.2	0.166667	-0.0333333	0.260342	EVN	0.1	0	-0.1	0.1	EVN
62	37	female	1	1	0	0	0.125	0.166667	0.291667	0.208333	LAR	0.125	0	0.125	0.125	EVN
46	12	male	1	1	0	0	0.125	0	0.125	0.125	EVN	0	0	0	0	LDA
68	16	female	1	1	0	0	0.125	0.166667	0.291667	0.208333	LAR	0.175	0	0.075	0.175	EVN
46	12	female	1	1	0	0	0	0	0	0	LDA	0	0	0	0	LDA
53	14	female	1	1	0	0	0	0	0	0	LDA	0	0	0	0	LDA
42	33	female	0	0	0	0	0	0	0	0	LDA	0	0	0	0	LDA
72	15	female	1	1	1	1	0.25	0	0.25	0.25	LAR	0.125	0	0.125	0.125	EVN
72	16	female	1	1	0	0	0.325	0.583333	0.508333	0.66776	LAR	0	0	0	0	LDA
49	12	female	1	1	1	1	0.3	0	0.2	0.3	EVN	1.45	0.3	0.25	1.48071	LAR
74	17	male	0	0	0	0	0	0	0	0	LDA	0	0	0	0	LDA
60	19	female	1	1	0	0	0.05	0	-0.05	0.05	LDA	0.3	0	0.2	0.3	EVN
73	12	female	1	1	0	0	0.05	0	-0.05	0.05	LDA	0	0	0	0	LDA
78	13	female	1	1	0	0	0	0	0	0	LDA	0.525	0	0.225	0.525	LAR
55	16	male	1	1	0	0	0	0	0	0	LDA	0	0	0	0	LDA
64	14	female	1	1	0	0	0	0	0	0	LDA	0	0	0	0	LDA
75	14	female	1	0	0	0	0.125	0	0.125	0.125	EVN	0	0.166667	0.166667	0.166667	EVN
47	20	female	1	1	1	1	0	0	0	0	LDA	0	0	0	0	LDA
51	12	female	1	1	0	0	0.15	0	-0.15	0.15	EVN	0.65	0	0.35	0.65	LAR
59	12	female	1	1	0	0	0.25	0	0.25	0.25	LAR	0.25	0	0.25	0.25	LAR
40	12	female	1	1	0	0	0	0.125	0.125	0.125	EVN	0	0	0	0	LDA
72	10	male	1	1	0	0	0	0	0	0	LDA	0	0	0	0	LDA
67	25	male	1	1	0	0	0	0	0	0	LDA	0	0	0	0	LDA
70	29	female	1	1	0	0	0.1	0	-0.1	0.1	EVN	0	0	0	0	LDA
68	19	female	1	1	0	0	0.05	0	-0.05	0.05	LDA	0.05	0	-0.05	0.05	LDA
55	38	female	1	1	0	0	0.333333	0	0.333333	0.333333	LAR	0.65	0.25	0.1	0.696419	EVN
73	0	male	0	0	0	0	0.35	0	0.15	0.35	EVN	0.3	0	0.2	0.3	EVN
83	12	female	0	0	0	0	0	0	0	0	LDA	0	0.25	0.25	0.25	LAR
74	15	female	1	1	0	0	0.142857	0	0.142857	0.142857	EVN	0.25	0	0.25	0.25	LAR
76	30	female	0	0	0	0	0	0	0	0	LDA	0	0	0	0	LDA
79	11	female	1	1	0	0	0	0	0	0	LDA	0	0	0	0	LDA
63	9	female	0	0	0	0	0	0	0	0	LDA	0	0	0	0	LDA
38	4	female	1	1	0	0	0	0	0	0	LDA	0	0	0	0	LDA
78	3	female	0	0	0	0	0	0	0	0	LDA	0	0	0	0	LDA
62	12	female	0	0	0	0	0	0.25	0.25	0.25	LAR	0	0.25	0.25	0.25	LAR
70	12	female	1	1	0	0	0	0	0	0	LDA	0	0	0	0	LDA
86	12	female	1	1	0	0	0	0	0	0	LDA	0	0	0	0	LDA
79	8	female	0	0	0	0	0.75	0	-0.25	0.75	SML	0.3	0.983333	0.383333	1.02808	LAR
74	12	female	1	1	0	0	0	0	0	0	LDA	0	0	0	0	LDA
45	7	female	1	1	1	1	0.05	0	-0.05	0.05	LDA	0.05	0.583333	0.533333	0.585472	LAR
65	18	female	1	1	1	1	0	0	0	0	LDA	0	0	0	0	LDA
38	15	female	1	1	0	0	0	0	0	0	LDA	0	0	0	0	LDA
62	24	female	0	0	1	1	0.25	1.42857	-0.321429	1.45028	SML	0	0	0	0	LDA
59	11	male	1	1	0	0	0.25	0	0.25	0.25	LAR	0.3	0	-0.3	0.3	SML
77	2	female	1	1	0	0	0	0	0	0	LDA	0.125	0	0.125	0.125	EVN
83	12	male	0	0	0	0	0	0.125	0.125	0.125	EVN	0	0	0	0	LDA
76	33	female	0	1	0	0	0.3	0	0.2	0.3	EVN	0.3	0	0.2	0.3	EVN
58	2	male	1	1	0	0	0	0	0	0	LDA	0	0	0	0	LDA
72	19	female	1	1	0	0	0.05	0	-0.05	0.05	LDA	0	0	0	0	LDA
69	11	male	1	1	0	0	0	0	0	0	LDA	0	0	0	0	LDA
64	29	female	1	1	0	0	0.435714	0.125	0.260714	0.45329	LAR	0.125	0.125	0.25	0.176777	LAR
62	2	male	0	1	0	0	0.375	0	0.375	0.375	LAR	0.3	0.125	0.325	0.325	LAR
66	17	female	0	0	0	0	0.125	0	0.125	0.125	EVN	0.125	0	0.125	0.125	EVN
82	20	male	0	0	0	0	0	0	0	0	LDA	0	0	0	0	LDA
67	17	female	1	1	0	0	0.625	0.166667	0.291667	0.646841	LAR	0.4	0	0.1	0.4	EVN
67	11	female	1	1	0	0	0	0	0	0	LDA	0	0.25	0.25	0.25	LAR
63	11	female	1	1	0	0	0.1	0	-0.1	0.1	EVN	0	0	0	0	LDA
60	11	female	1	1	0	0	0.25	0	0.25	0.25	LAR	0	0	0	0	LDA
56	11	female	1	1	0	0	0	0	0	0	LDA	0	0	0	0	LDA
76	28	female	1	1	0	0	0.333333	0.166667	0.5	0.372678	LAR	0.25	0	0.25	0.25	LAR
64	13	female	1	1	0	0	0.8	0.583333	0.783333	0.99009	LAR	0.125	0.291667	0.416667	0.317324	LAR
68	12	female	0	0	0	0	0	0	0	0	LDA	0	0	0	0	LDA
61	3	female	0	1	0	0	0	0	0	0	LDA	0.05	0	-0.05	0.05	LDA
62	10	male	0	0	0	0	0.25	0	0.25	0.25	LAR	0.225	0	0.025	0.225	EVN
68	33	female	0	0	1	1	0	0	0	0	LDA	0	0	0	0	LDA
71	12	male	1	1	0	0	0	0	0	0	LDA	0	0	0	0	LDA
79	25	male	0	0	0	0	0.5	0	0.5	0.5	LAR	0.25	0	0.25	0.25	LAR
72	12	male	0	0	0	0	0	0	0	0	LDA	0	1.125	-0.875	1.125	SML
66	3	female	1	1	0	0	0	0.291667	0.291667	0.291667	LAR	0	0.166667	0.166667	0.166667	EVN
43	12	female	0	0	1	1	0	0	0	0	LDA	0	0	0	0	LDA
63	11	female	1	1	0	0	0.125	0.125	0.25	0.176777	LAR	0.25	0	0.25	0.25	LAR
63	10	female	1	1	0	0	0.125	0	0.125	0.125	EVN	0	0	0	0	LDA
41	0	female	1	1	0	0	0	0	0	0	LDA	0.1	0	-0.1	0.1	EVN
65	5	female	1	1	0	0	0.35	0.125	0.275	0.371652	LAR	0	0	0	0	LDA
80	16	male	1	0	0	0	0	0	0	0	LDA	0	0	0	0	LDA
67	23	female	1	1	0	0	0.125	0.142857	0.267857	0.189824	LAR	0.3	0.625	-0.675	0.693271	SML
67	14	female	1	1	0	0	0	0	0	0	LDA	0	0	0	0	LDA
32	11	female	0	0	0	0	0	0.125	0.125	0.125	EVN	0	0	0	0	LDA
70	29	female	0	0	0	0	0	0	0	0	LDA	0	0	0	0	LDA
74	5	female	1	1	0	0	0	0	0	0	LDA	0.25	0	0.25	0.25	LAR
49	13	female	1	1	1	1	0.625	0.25	0.875	0.673146	LAR	0.8	0.25	0.95	0.838153	LAR
69	11	male	1	1	1	1	0.125	0.142857	0.267857	0.189824	LAR	0.7	0.65	0.15	0.955249	EVN
43	11	female	1	1	1	1	0	0.166667	0.166667	0.166667	EVN	0	0.125	0.125	0.125	EVN
71	10	female	0	1	0	0	0.675	0.55	0.025	0.870704	EVN	0	0	0	0	LDA
41	11	female	1	1	0	0	0.625	0	0.625	0.625	LAR	0.375	0	0.375	0.375	LAR
64	40	female	1	1	0	0	0	0	0	0	LDA	0	0	0	0	LDA
77	17	female	1	0	1	1	0.375	0	0.375	0.375	LAR	0	0	0	0	LDA
55	11	female	1	1	0	0	0.05	0.1	-0.15	0.111803	EVN	0	0	0	0	LDA
82	11	female	0	0	0	0	0.35	0.416667	0.566667	0.544161	LAR	0	0	0	0	LDA
63	11	female	1	0	1	1	0	0	0	0	LDA	0	0	0	0	LDA
65	10	female	0	0	0	0	0.225	0	0.025	0.225	EVN	0.175	0	0.075	0.175	EVN
72	3	female	0	0	0	0	0.175	0	0.075	0.175	EVN	0.225	0	0.025	0.225	EVN
70	17	male	0	0	0	0	0.125	0.125	0.25	0.176777	LAR	0.125	0.1	0.025	0.160078	EVN
48	11	female	0	0	0	0	0.125	0	0.125	0.125	EVN	0.25	0	0.25	0.25	LAR
67	30	female	1	1	0	0	0.25	0	0.25	0.25	LAR	0	0	0	0	LDA
75	11	female	0	0	1	1	0	0	0	0	LDA	0	0	0	0	LDA
63	14	female	1	1	0	0	0.875	0.291667	0.166667	0.922331	EVN	0.175	0.291667	0.366667	0.340139	LAR
60	11	female	0	0	0	0	0.125	0.452381	0.577381	0.469333	LAR	0	0	0	0	LDA
57	12	male	1	0	0	0	0.25	0	0.25	0.25	LAR	0	0	0	0	LDA
67	11	female	0	0	0	0	0.25	0	0.25	0.25	LAR	0.125	0	0.125	0.125	EVN
51	13	female	1	1	0	0	0.275	0	-0.025	0.275	EVN	0.55	0	-0.05	0.55	EVN
65	32	female	0	0	1	1	0	1.16667	-0.833333	1.16667	SML	0.25	1	-0.75	1.03078	SML
50	11	female	1	1	0	0	0.125	0	0.125	0.125	EVN	0	0	0	0	LDA
68	27	female	1	1	0	0	0.375	0.333333	0.708333	0.501733	LAR	0.575	0	0.175	0.575	EVN
62	13	female	1	1	0	0	0.425	0.225	0.35	0.480885	LAR	0.375	0	0.375	0.375	LAR
54	11	female	1	1	0	0	0.375	0	0.375	0.375	LAR	0.25	0.166667	0.416667	0.300463	LAR
41	11	female	0	0	1	1	0.05	0.125	0.075	0.134629	EVN	0.175	0	0.075	0.175	EVN
46	10	male	1	1	0	0	0.125	0	0.125	0.125	EVN	0.125	0	0.125	0.125	EVN
72	24	female	1	1	0	0	0	0	0	0	LDA	0	0	0	0	LDA
66	16	female	1	1	0	0	0	0	0	0	LDA	0.125	0	0.125	0.125	EVN
76	13	female	0	0	0	0	0.375	0	0.375	0.375	LAR	1.575	0.958333	1.13333	1.84365	LAR
66	11	female	1	1	0	0	0	0	0	0	LDA	0	0	0	0	LDA
65	10	male	0	0	0	0	0	0	0	0	LDA	0	0	0	0	LDA
68	10	female	1	1	0	0	0	0	0	0	LDA	0	0	0	0	LDA
79	10	female	0	0	0	0	0	0	0	0	LDA	0.1	0	-0.1	0.1	EVN
50	11	female	0	0	1	1	0	0	0	0	LDA	0	0	0	0	LDA
72	11	female	1	1	0	0	0.425	0.125	0.45	0.443001	LAR	0	0	0	0	LDA
74	11	female	0	0	1	1	0.65	0.166667	0.0166667	0.671027	EVN	0	0	0	0	LDA
65	10	female	1	1	0	0	0	0	0	0	LDA	0	0	0	0	LDA
65	40	female	1	1	0	0	0.05	0	-0.05	0.05	LDA	0.05	0	-0.05	0.05	LDA
69	25	female	0	0	0	0	0	0	0	0	LDA	0	0	0	0	LDA
77	17	female	1	1	0	0	0	0	0	0	LDA	0	0	0	0	LDA
75	18	female	1	1	0	0	0	0	0	0	LDA	0	0	0	0	LDA
74	12	female	1	1	0	0	0	0	0	0	LDA	0	0	0	0	LDA
60	15	female	1	1	0	0	0	0.125	0.125	0.125	EVN	0	0.125	0.125	0.125	EVN
84	12	female	1	1	0	0	0	0	0	0	LDA	0	0	0	0	LDA
47	10	female	1	1	0	0	0	0	0	0	LDA	0	0	0	0	LDA
54	5	female	0	0	0	0	0	0	0	0	LDA	0	0	0	0	LDA
49	38	female	0	0	1	1	0.125	0	0.125	0.125	EVN	0	0	0	0	LDA
78	10	female	0	0	1	1	0.1	0	-0.1	0.1	EVN	0.1	0	-0.1	0.1	EVN
64	12	female	1	0	0	0	0.475	0	0.275	0.475	LAR	0.675	0	0.075	0.675	EVN
66	12	female	1	1	0	0	0	0	0	0	LDA	0	0	0	0	LDA
37	12	female	1	1	0	0	0.125	0	0.125	0.125	EVN	0.125	0	0.125	0.125	EVN
55	19	female	1	1	0	0	0.1	0	-0.1	0.1	EVN	0.05	0	-0.05	0.05	LDA
61	12	female	1	1	0	0	0.15	0.291667	0.141667	0.327978	EVN	0.4	0.291667	0.391667	0.495045	LAR
77	3	female	1	1	0	0	0	1	-1	1	SML	0	1	-1	1	SML
71	18	female	1	1	0	0	0	0	0	0	LDA	0.1	0	-0.1	0.1	EVN
73	10	female	1	1	0	0	0.125	0	0.125	0.125	EVN	0	0	0	0	LDA
73	27	male	1	1	0	0	0	0	0	0	LDA	0.125	0	0.125	0.125	EVN
62	21	female	0	1	0	0	0.125	0	0.125	0.125	EVN	0.125	0	0.125	0.125	EVN
66	20	female	1	1	0	0	0.25	0.125	0.375	0.279508	LAR	0.2	0.125	-0.075	0.23585	EVN
63	10	female	1	1	0	0	0	0	0	0	LDA	0	0	0	0	LDA
62	12	female	1	1	0	0	0	0	0	0	LDA	0	0	0	0	LDA
53	11	female	1	1	1	1	0	0	0	0	LDA	0	0	0	0	LDA
60	11	female	1	1	0	0	0	0	0	0	LDA	0.375	0	0.375	0.375	LAR
52	17	female	1	1	0	0	0.65	0.291667	0.141667	0.712439	EVN	0.3	0.125	-0.175	0.325	EVN
63	15	female	0	0	0	0	0	0	0	0	LDA	0.05	0	-0.05	0.05	LDA
64	10	male	1	1	0	0	0	0	0	0	LDA	0	0	0	0	LDA
72	10	female	1	1	0	0	0	0	0	0	LDA	0.1	0.658333	0.158333	0.665885	EVN
59	10	female	1	1	0	0	0.225	0	0.025	0.225	EVN	0.175	0	0.075	0.175	EVN
64	10	female	1	1	0	0	0.5	0	0.5	0.5	LAR	0	0	0	0	LDA
46	1	female	1	1	0	0	0.05	0	-0.05	0.05	LDA	0.35	0	0.15	0.35	EVN
55	6	female	1	1	0	0	0	0	0	0	LDA	0	0	0	0	LDA
75	11	female	0	0	1	1	0	0	0	0	LDA	0	0	0	0	LDA
75	13	female	0	0	0	0	0	0	0	0	LDA	0	0	0	0	LDA
56	10	female	1	1	0	0	0.25	0	0.25	0.25	LAR	0	0	0	0	LDA
30	10	female	0	0	1	0	2.3	1.25	-0.55	2.61773	SML	0.95	1.5	-0.45	1.77553	SML
57	3	female	0	0	0	0	0	0	0	0	LDA	0	0	0	0	LDA
28	10	male	0	0	1	1	0	0	0	0	LDA	0.25	0	0.25	0.25	LAR
71	11	female	1	1	0	0	0	0	0	0	LDA	0	0	0	0	LDA
35	17	female	1	1	1	1	0.1	0.375	0.275	0.388104	LAR	0.35	0	0.15	0.35	EVN
47	12	female	0	0	0	0	0	0	0	0	LDA	0	0	0	0	LDA
77	11	male	1	1	0	0	0.05	0	-0.05	0.05	LDA	0.125	0	0.125	0.125	EVN
49	16	male	1	1	0	0	0.125	0	0.125	0.125	EVN	0.375	0	0.375	0.375	LAR
54	11	male	1	1	0	0	0	0	0	0	LDA	0	0	0	0	LDA
71	20	female	0	0	0	0	0.25	0	0.25	0.25	LAR	0	0	0	0	LDA
63	11	male	1	1	0	0	0	0	0	0	LDA	0.25	0	0.25	0.25	LAR
49	21	female	1	1	1	1	0	0.1	-0.1	0.1	EVN	0.475	0.1	0.175	0.485412	EVN
64	13	female	1	1	0	0	0.05	0	-0.05	0.05	LDA	0.05	0	-0.05	0.05	LDA
66	12	female	1	1	1	0	0.675	0	0.075	0.675	EVN	0.525	0	0.225	0.525	LAR
72	39	female	1	1	0	0	0.125	0	0.125	0.125	EVN	0.125	0	0.125	0.125	EVN
68	17	female	1	1	0	0	0	0	0	0	LDA	0	0	0	0	LDA
65	15	female	1	0	1	1	0	0	0	0	LDA	0	0	0	0	LDA
74	10	female	0	0	1	1	0.25	0	0.25	0.25	LAR	0.25	0	0.25	0.25	LAR
69	14	female	1	1	0	0	0	0	0	0	LDA	0	0	0	0	LDA
47	8	male	1	1	1	1	0	0.666667	0.666667	0.666667	LAR	0	0	0	0	LDA
67	10	female	1	1	0	0	0	0	0	0	LDA	0.4	0	0.1	0.4	EVN
73	19	female	1	1	0	0	0.25	0.142857	0.392857	0.287938	LAR	0.575	0	0.175	0.575	EVN
65	25	female	1	1	0	0	0.8	0	-0.8	0.8	SML	0	0	0	0	LDA
37	11	female	0	0	0	0	0	0	0	0	LDA	0	0	0	0	LDA
68	10	female	0	0	1	1	0	0	0	0	LDA	0	0	0	0	LDA
66	27	female	0	0	1	1	0.25	0	0.25	0.25	LAR	0	0	0	0	LDA
73	7	male	1	1	0	0	0	0	0	0	LDA	0.125	0	0.125	0.125	EVN
66	10	female	0	0	0	0	0	0	0	0	LDA	0	0	0	0	LDA
65	10	male	1	1	0	0	0	0	0	0	LDA	0	0	0	0	LDA
74	21	female	1	1	0	0	0.375	0	0.375	0.375	LAR	0	0	0	0	LDA
33	10	female	1	0	0	0	0.1	0	-0.1	0.1	EVN	0.625	0	0.125	0.625	EVN
59	16	male	0	0	0	0	0	0	0	0	LDA	0	0	0	0	LDA
70	31	male	1	1	1	1	0.375	0.1	0.275	0.388104	LAR	0	0	0	0	LDA
57	12	male	1	0	0	0	0	0	0	0	LDA	0	0	0	0	LDA
72	12	female	0	0	0	0	0.2	0	-0.2	0.2	SML	0.25	0	0.25	0.25	LAR
39	9	female	1	1	0	0	0	0	0	0	LDA	0.05	0.225	-0.025	0.230489	EVN
57	16	female	1	1	1	1	0.125	0.125	0.25	0.176777	LAR	0.25	0.458333	0.708333	0.522082	LAR
72	12	female	1	1	0	0	0.175	0	0.075	0.175	EVN	0	0	0	0	LDA
71	8	female	0	0	0	0	0.15	0	-0.15	0.15	EVN	0.25	0	0.25	0.25	LAR
74	27	male	1	1	0	0	0	0.25	0.25	0.25	LAR	0	0.25	0.25	0.25	LAR
50	9	male	1	1	0	0	0	0	0	0	LDA	0	0	0	0	LDA
70	5	female	1	1	0	0	0.1	1	-1.1	1.00499	SML	0.1	0	-0.1	0.1	EVN
81	31	female	1	1	0	0	0.275	0	-0.025	0.275	EVN	0.125	0	0.125	0.125	EVN
69	19	male	1	1	0	0	0	0	0	0	LDA	0	0	0	0	LDA
61	26	female	0	0	1	1	0.25	0.291667	0.541667	0.384148	LAR	0.125	0	0.125	0.125	EVN
77	11	male	0	0	0	0	0	0	0	0	LDA	0	0	0	0	LDA
68	9	female	0	0	0	0	0	0.125	0.125	0.125	EVN	0.05	0	-0.05	0.05	LDA
81	1	male	0	0	0	0	0	0	0	0	LDA	0	0	0	0	LDA
71	10	female	0	0	0	0	0	0	0	0	LDA	0	0.166667	0.166667	0.166667	EVN
59	13	female	0	0	0	0	0.175	0	0.075	0.175	EVN	0.175	0	0.075	0.175	EVN
65	20	female	1	1	0	0	0	0	0	0	LDA	0	0	0	0	LDA
64	10	female	1	1	0	0	0	0	0	0	LDA	0	0	0	0	LDA
61	14	female	1	1	0	0	0.05	0	-0.05	0.05	LDA	0.725	0	0.025	0.725	EVN
72	14	female	1	1	0	0	0	0	0	0	LDA	0	0	0	0	LDA
55	25	female	1	1	0	0	0.125	0.125	0.25	0.176777	LAR	0	0	0	0	LDA
52	25	male	1	1	0	0	0	0	0	0	LDA	0	0	0	0	LDA
66	10	female	1	1	0	0	0	0	0	0	LDA	0	0	0	0	LDA
71	10	female	1	1	0	0	0	0.225	0.025	0.225	EVN	0	0.25	0.25	0.25	LAR
73	6	male	0	0	0	0	0.125	0	0.125	0.125	EVN	0.125	0	0.125	0.125	EVN
65	17	female	1	1	0	0	0.25	0	0.25	0.25	LAR	0.25	0	0.25	0.25	LAR
45	24	female	0	0	0	0	0	0	0	0	LDA	0	0	0	0	LDA
61	20	female	0	0	0	0	0.05	0	-0.05	0.05	LDA	0.1	0	-0.1	0.1	EVN
74	16	female	1	1	0	0	0.4	0.125	0.225	0.419076	LAR	0.05	0.125	0.075	0.134629	EVN
46	12	female	1	1	0	0	0	0.125	0.125	0.125	EVN	0	0	0	0	LDA
66	10	female	1	1	0	0	0.175	0	0.075	0.175	EVN	0.3	0	0.2	0.3	EVN
76	18	female	1	1	0	0	0.1	0	-0.1	0.1	EVN	0	0	0	0	LDA
55	9	female	1	1	0	0	0.125	0	0.125	0.125	EVN	0.125	0	0.125	0.125	EVN
71	9	female	1	1	0	0	0.435714	0	0.135714	0.435714	EVN	0.1	0	-0.1	0.1	EVN
69	9	female	0	0	1	1	0	0	0	0	LDA	0	0	0	0	LDA
82	9	male	0	0	0	0	0	0	0	0	LDA	0	0	0	0	LDA
74	10	male	1	1	0	0	0	0	0	0	LDA	0	0	0	0	LDA
74	9	female	1	1	0	0	0.5	0	0.5	0.5	LAR	0.375	0	0.375	0.375	LAR
73	9	female	1	1	0	0	0.175	0.125	0.2	0.215058	EVN	0.175	0	0.075	0.175	EVN
79	9	female	0	0	0	0	0.35	0	0.15	0.35	EVN	1.45	2.69167	-0.558333	3.05738	SML
67	27	female	0	0	0	0	0	0.166667	0.166667	0.166667	EVN	0	0	0	0	LDA
29	11	female	0	0	0	0	0	0	0	0	LDA	0	0	0	0	LDA
50	24	female	1	1	0	0	0.15	0	-0.15	0.15	EVN	0	0	0	0	LDA
66	11	female	1	1	0	0	0	0.366667	0.366667	0.366667	LAR	0	0.125	0.125	0.125	EVN
74	21	female	0	0	0	0	0.5	0.4	0.9	0.640312	LAR	0.725	0.25	0.775	0.766893	LAR
73	9	female	0	0	0	0	0.175	0	0.075	0.175	EVN	0.05	0	-0.05	0.05	LDA
58	30	female	1	1	0	0	0	0	0	0	LDA	0	0	0	0	LDA
57	9	female	1	1	1	1	0	0	0	0	LDA	0	0	0	0	LDA
58	4	female	1	1	1	1	0	0	0	0	LDA	0	0	0	0	LDA
57	37	female	0	0	0	0	1.25	0	-0.75	1.25	SML	0	0	0	0	LDA
83	9	female	1	1	0	0	0.25	0.125	0.375	0.279508	LAR	0.425	0.166667	0.491667	0.456512	LAR
40	22	female	1	1	0	0	0.125	0.125	0.25	0.176777	LAR	0.125	0.125	0.25	0.176777	LAR
47	9	female	1	1	0	0	0	0.125	0.125	0.125	EVN	0	0.25	0.25	0.25	LAR
49	9	female	1	1	0	0	0	0	0	0	LDA	0.1	0	-0.1	0.1	EVN
64	28	female	1	1	0	1	0	0	0	0	LDA	0.225	0	0.025	0.225	EVN
66	10	female	1	1	0	0	0	0	0	0	LDA	0	0	0	0	LDA
81	20	female	1	0	0	0	0.375	0	0.375	0.375	LAR	0.125	0	0.125	0.125	EVN
95	9	female	0	0	0	0	0	0	0	0	LDA	0	0	0	0	LDA
71	10	female	1	1	0	0	0	0	0	0	LDA	0	0	0	0	LDA
55	11	female	1	1	0	0	0.225	0	0.025	0.225	EVN	0.225	0	0.025	0.225	EVN
70	35	female	0	0	1	1	0.2	0	-0.2	0.2	SML	0.475	0	-0.225	0.475	SML
65	12	female	1	1	0	0	0	0.125	0.125	0.125	EVN	0.9	0.125	0.225	0.908639	LAR
61	9	female	1	1	0	0	0	0	0	0	LDA	0	0	0	0	LDA
64	6	female	1	0	0	0	0	0	0	0	LDA	0	0	0	0	LDA
64	22	female	0	0	0	0	0	0	0	0	LDA	0	0	0	0	LDA
65	13	female	1	1	1	1	0	0	0	0	LDA	0	0	0	0	LDA
71	22	female	0	0	1	1	0.25	0.333333	0.583333	0.416667	LAR	0	0.583333	0.583333	0.583333	LAR
61	10	female	1	1	0	0	0.05	0.166667	0.116667	0.174005	EVN	0	0	0	0	LDA
51	8	female	0	0	0	0	0.1	0	-0.1	0.1	EVN	0	0	0	0	LDA
81	9	male	1	1	0	0	0.125	0.25	0.375	0.279508	LAR	0.225	0	0.025	0.225	EVN
57	9	female	1	1	0	0	0	0	0	0	LDA	0	0	0	0	LDA
74	9	female	1	0	0	0	0.15	0	-0.15	0.15	EVN	0.325	0.3	-0.375	0.442295	SML
64	48	female	0	0	0	0	0.225	0	0.025	0.225	EVN	0	0.25	0.25	0.25	LAR
83	9	female	1	1	0	0	0	0	0	0	LDA	0	0	0	0	LDA
63	24	male	1	1	1	1	0	0	0	0	LDA	0	0	0	0	LDA
69	8	male	1	1	0	0	0	0	0	0	LDA	0	0	0	0	LDA
49	9	male	0	0	0	0	0	0	0	0	LDA	0.05	0	-0.05	0.05	LDA
48	1	female	1	1	0	0	0.4	0.291667	0.391667	0.495045	LAR	0.225	0.125	0.15	0.257391	EVN
49	0	female	0	1	0	0	0.05	0	-0.05	0.05	LDA	0	0	0	0	LDA
77	14	female	1	1	0	0	0.125	0	0.125	0.125	EVN	0.05	0	-0.05	0.05	LDA
66	9	male	1	0	0	0	0.125	0	0.125	0.125	EVN	0.5	0	0.5	0.5	LAR
69	9	female	1	1	0	0	0.5	0	0.5	0.5	LAR	0.125	0	0.125	0.125	EVN
63	12	female	0	0	1	1	0.25	0	0.25	0.25	LAR	0.125	0	0.125	0.125	EVN
67	9	female	0	1	0	0	0.25	0.416667	0.166667	0.485913	EVN	0	0.125	0.125	0.125	EVN
40	14	female	1	1	0	0	0.15	0	-0.15	0.15	EVN	0	0	0	0	LDA
60	17	female	1	1	0	0	0.25	0	0.25	0.25	LAR	0.25	0.125	0.375	0.279508	LAR
70	12	female	1	1	1	1	0	0	0	0	LDA	0	0	0	0	LDA
44	18	female	1	1	0	0	0.25	0	0.25	0.25	LAR	0.125	0	0.125	0.125	EVN
56	8	female	0	0	0	0	0	0	0	0	LDA	0	0	0	0	LDA
33	12	male	0	0	0	0	0	0	0	0	LDA	0	0	0	0	LDA
64	9	female	0	1	0	0	0.875	0	0.375	0.875	LAR	0.5	0	0	0.5	EVN
68	8	male	1	0	1	1	0.125	0	0.125	0.125	EVN	0.125	0.125	0.25	0.176777	LAR
66	9	female	0	0	0	0	0	0.25	0.25	0.25	LAR	0.1	0.25	0.15	0.269258	EVN
63	1	male	1	0	0	0	0.475	0	-0.225	0.475	SML	0.525	0	-0.275	0.525	SML
69	16	female	1	1	0	0	0	0	0	0	LDA	0.25	0	0.25	0.25	LAR
72	9	female	1	1	0	0	0	0	0	0	LDA	0	0	0	0	LDA
74	22	female	0	0	0	0	0.225	0	0.025	0.225	EVN	0.05	0	-0.05	0.05	LDA
83	42	female	1	1	1	0	0	0.166667	0.166667	0.166667	EVN	0	0	0	0	LDA
61	13	female	0	0	0	0	0	0	0	0	LDA	0	0	0	0	LDA
54	11	female	0	0	0	0	0	0	0	0	LDA	0	0	0	0	LDA
66	9	female	1	1	0	0	0.125	0	0.125	0.125	EVN	0	0	0	0	LDA
67	7	female	1	1	0	0	0.125	0.25	0.375	0.279508	LAR	0.25	0	0.25	0.25	LAR
65	33	female	0	0	0	0	0	0	0	0	LDA	0.05	0	-0.05	0.05	LDA
71	8	male	0	0	0	0	0	0	0	0	LDA	0.125	0	0.125	0.125	EVN
38	23	female	1	1	0	0	0.5	0	-3.72529e-09	0.5	EVN	0.3	0	-0.3	0.3	SML
69	18	female	0	0	1	1	1.2	0.708333	0.508333	1.39346	LAR	1.15	0.5	-0.15	1.25399	EVN
69	53	female	1	1	0	0	0	0	0	0	LDA	0.125	0	0.125	0.125	EVN
72	8	male	1	0	0	0	0	0	0	0	LDA	0	0	0	0	LDA
71	12	female	0	0	1	1	0	0.166667	0.166667	0.166667	EVN	0.25	0.25	0.5	0.353553	LAR
36	17	female	0	0	1	1	1.1	1.71667	0.0166667	2.03886	EVN	0.4	0.125	-0.275	0.419076	SML
50	9	male	0	0	0	0	0.05	0	-0.05	0.05	LDA	0	0	0	0	LDA
73	10	female	1	1	0	0	0	0	0	0	LDA	0	0	0	0	LDA
65	10	female	1	1	0	0	0.175	0.1	-0.025	0.201556	EVN	0.3	0.3	-0.1	0.424264	EVN
63	7	female	1	1	0	0	0.125	0	0.125	0.125	EVN	0	0	0	0	LDA
90	8	female	0	0	0	0	0	0	0	0	LDA	0	0	0	0	LDA
69	8	male	1	1	0	0	0	0	0	0	LDA	0	0	0	0	LDA
78	12	female	0	0	0	0	0	0	0	0	LDA	0.25	0	0.25	0.25	LAR
78	8	female	0	0	0	0	0	0	0	0	LDA	0	0	0	0	LDA
60	18	female	1	1	1	1	0.125	0	0.125	0.125	EVN	0.725	0	0.525	0.725	LAR
76	9	female	1	1	0	0	0.175	0	0.075	0.175	EVN	0.25	0	0.25	0.25	LAR
58	4	male	1	1	0	0	0.1	0	-0.1	0.1	EVN	0.2	0	-0.2	0.2	SML
79	12	female	0	0	0	0	0.1	0.125	0.025	0.160078	EVN	0.25	0.125	-0.125	0.279509	EVN
53	8	female	1	1	0	0	0.05	0	-0.05	0.05	LDA	0.35	0	0.15	0.35	EVN
77	8	female	0	0	0	0	0.575	0.291667	0.466667	0.644744	LAR	0.65	0.291667	0.641667	0.712439	LAR
77	43	female	1	1	0	0	0.5	0	0.5	0.5	LAR	0.125	0.125	0.25	0.176777	LAR
65	14	female	0	0	0	0	0	0	0	0	LDA	0	0	0	0	LDA
72	8	male	0	0	1	1	0	0	0	0	LDA	0	0	0	0	LDA
68	9	female	1	1	0	0	0.05	0.125	0.075	0.134629	EVN	0	0	0	0	LDA
59	8	male	1	1	0	0	0	0	0	0	LDA	0	0	0	0	LDA
46	11	female	1	1	0	0	0	0	0	0	LDA	0	0	0	0	LDA
65	14	female	1	1	0	0	0	0	0	0	LDA	0	0	0	0	LDA
74	4	female	0	0	0	0	1.5	0	2.23517e-08	1.5	EVN	0	0	0	0	LDA
68	18	female	0	0	1	1	0	0.125	0.125	0.125	EVN	0	0	0	0	LDA
66	8	female	1	1	0	0	0	0	0	0	LDA	0	0	0	0	LDA
73	14	female	1	1	0	0	0	0	0	0	LDA	0	0	0	0	LDA
67	8	female	1	1	0	0	0	0.291667	0.291667	0.291667	LAR	0	0.125	0.125	0.125	EVN
73	4	female	0	0	0	0	0.125	0	0.125	0.125	EVN	0	0	0	0	LDA
80	8	female	1	1	0	0	0	0	0	0	LDA	0.05	0	-0.05	0.05	LDA
57	8	female	1	1	0	0	0.375	0	0.375	0.375	LAR	0	0	0	0	LDA
80	8	female	1	1	0	0	0	0	0	0	LDA	0	0	0	0	LDA
64	9	female	1	1	0	0	0.2	0	-0.2	0.2	SML	0.05	0	-0.05	0.05	LDA
58	9	female	0	0	0	0	0.5	0.25	0.75	0.559017	LAR	0.125	0.125	0.25	0.176777	LAR
60	9	male	1	1	0	0	0	0	0	0	LDA	0	0	0	0	LDA
61	17	female	1	0	0	0	0.25	0	0.25	0.25	LAR	0.25	0	0.25	0.25	LAR
53	8	female	1	1	0	0	0	0.375	0.375	0.375	LAR	0.35	0.125	0.275	0.371652	LAR
69	1	female	1	1	0	0	0	0	0	0	LDA	0	0	0	0	LDA
80	7	female	1	1	0	0	0.25	0	0.25	0.25	LAR	0	0	0	0	LDA
60	8	male	1	1	0	0	0	0	0	0	LDA	0.375	0	0.375	0.375	LAR
66	20	male	1	1	0	0	0.05	0	-0.05	0.05	LDA	0.05	0	-0.05	0.05	LDA
63	10	female	1	1	0	0	0	0	0	0	LDA	0.225	0	0.025	0.225	EVN
63	23	female	1	1	0	0	0.25	0	0.25	0.25	LAR	0	0	0	0	LDA
70	9	female	1	1	1	1	0.225	0	0.025	0.225	EVN	0.275	0	-0.025	0.275	EVN
38	8	male	1	1	0	0	0	0	0	0	LDA	0	0	0	0	LDA
32	11	female	1	1	0	0	0.15	0	-0.15	0.15	EVN	0.2	0	-0.2	0.2	SML
45	8	female	1	1	1	1	0	0	0	0	LDA	0	0	0	0	LDA
86	7	female	0	0	0	0	0.5	0	0	0.5	EVN	0.75	0.125	0.875	0.760345	LAR
76	42	female	0	0	0	0	0	0	0	0	LDA	0	0	0	0	LDA
50	21	female	0	0	0	0	0.05	0	-0.05	0.05	LDA	0.225	0	0.025	0.225	EVN
54	7	female	0	0	0	0	0	0	0	0	LDA	0	0	0	0	LDA
53	4	female	1	1	0	0	0	0	0	0	LDA	0.1	0	-0.1	0.1	EVN
73	28	female	0	0	1	1	0.125	0	0.125	0.125	EVN	0	0	0	0	LDA
42	7	female	1	1	0	0	0	0	0	0	LDA	0	0	0	0	LDA
39	8	female	1	1	1	1	0	0	0	0	LDA	0	0	0	0	LDA
64	7	female	1	1	0	0	0	0.125	0.125	0.125	EVN	0.1	0	-0.1	0.1	EVN
66	8	female	0	0	1	1	0.25	0.125	0.375	0.279508	LAR	0.1	0	-0.1	0.1	EVN
51	7	female	1	1	0	0	0	0	0	0	LDA	0	0	0	0	LDA
66	10	female	0	0	0	0	0	0	0	0	LDA	0	0	0	0	LDA
72	20	female	0	0	1	1	0	0	0	0	LDA	0	0	0	0	LDA
79	9	female	1	1	0	0	0.225	0	0.025	0.225	EVN	0	0	0	0	LDA
63	8	female	1	1	1	1	0.125	0.166667	0.291667	0.208333	LAR	0	0	0	0	LDA
51	7	female	1	1	0	0	0	0	0	0	LDA	0	0	0	0	LDA
52	0	male	0	1	0	0	0	0.6	-0.6	0.6	SML	0.125	0.3	-0.175	0.325	EVN
60	11	female	1	1	1	1	0	1.41667	-0.583333	1.41667	SML	0.1	0	-0.1	0.1	EVN
35	7	female	0	0	0	0	0.05	0	-0.05	0.05	LDA	0	0	0	0	LDA
69	7	male	1	1	0	0	0.125	0	0.125	0.125	EVN	0	0	0	0	LDA
77	8	male	1	1	0	0	0.225	0	0.025	0.225	EVN	0.05	0	-0.05	0.05	LDA
73	8	male	1	1	0	0	0.25	0	0.25	0.25	LAR	0	0	0	0	LDA
74	0	female	0	0	0	0	1.025	0	0.725	1.025	LAR	0	0	0	0	LDA
49	7	female	1	1	0	0	0.125	0	0.125	0.125	EVN	0.1	0	-0.1	0.1	EVN
54	3	female	0	0	0	0	0.475	0	0.275	0.475	LAR	0.225	0	0.025	0.225	EVN
66	7	female	1	1	0	0	0	0	0	0	LDA	0.5	0	0.5	0.5	LAR
81	20	female	0	0	0	0	0.25	0	0.25	0.25	LAR	0	0	0	0	LDA
70	17	female	1	1	0	0	0.45	0	0.05	0.45	EVN	0.4	0	0.1	0.4	EVN
62	19	female	1	1	0	0	0.3	0	0.2	0.3	EVN	0.125	0	0.125	0.125	EVN
75	8	female	0	0	0	0	0.7	0	0.3	0.7	LAR	0.25	0	0.25	0.25	LAR
76	8	male	0	0	0	0	0	0	0	0	LDA	0	0	0	0	LDA
60	7	female	1	1	0	0	0.125	0	0.125	0.125	EVN	0	0	0	0	LDA
74	7	female	1	1	1	1	0	0	0	0	LDA	0	0	0	0	LDA
70	7	female	0	0	1	1	0	0	0	0	LDA	0	0	0	0	LDA
55	7	male	1	1	0	0	0	0	0	0	LDA	0	0	0	0	LDA
63	15	female	1	1	1	1	0	0.125	0.125	0.125	EVN	0.65	0.816667	-0.133333	1.04376	EVN
80	48	female	0	0	0	0	0	0	0	0	LDA	0	0	0	0	LDA
49	7	male	1	1	1	1	0	0	0	0	LDA	0.125	0	0.125	0.125	EVN
64	14	female	1	1	1	1	0	0	0	0	LDA	0	0	0	0	LDA
38	7	female	1	1	0	0	0.1	0	-0.1	0.1	EVN	0.1	0	-0.1	0.1	EVN
63	7	male	0	0	0	0	0	0	0	0	LDA	0.05	0	-0.05	0.05	LDA
57	6	female	1	1	0	0	0	0	0	0	LDA	0.05	0	-0.05	0.05	LDA
59	24	female	1	1	0	0	0.125	0	0.125	0.125	EVN	0.05	0	-0.05	0.05	LDA
66	7	female	1	1	0	0	0	0	0	0	LDA	0.25	0	-0.25	0.25	SML
71	7	female	0	0	1	1	0	0	0	0	LDA	0.3	0	0.2	0.3	EVN
27	9	female	0	0	0	0	0	0	0	0	LDA	0	0	0	0	LDA
70	9	female	0	0	0	0	0	0	0	0	LDA	0	0	0	0	LDA
56	9	female	1	1	0	1	2.225	1.75	-0.725	2.83075	SML	0	0	0	0	LDA
44	7	female	0	0	0	0	0	0	0	0	LDA	0	0	0	0	LDA
65	32	female	1	1	0	0	0	0	0	0	LDA	0	0	0	0	LDA
43	8	female	1	1	0	0	0	0	0	0	LDA	0	0	0	0	LDA
66	0	male	1	1	0	0	0	0	0	0	LDA	0.675	0	0.075	0.675	EVN
69	7	male	1	0	0	0	0	0	0	0	LDA	0	0	0	0	LDA
71	7	female	0	0	0	0	0	0	0	0	LDA	0	0	0	0	LDA
61	27	male	1	1	0	0	0.525	0	0.225	0.525	LAR	0	0	0	0	LDA
80	7	female	0	0	0	0	0.125	0	0.125	0.125	EVN	0.125	0	0.125	0.125	EVN
46	7	female	1	1	0	0	0	0	0	0	LDA	0.05	0	-0.05	0.05	LDA
65	7	male	0	0	0	0	0.75	0	0.75	0.75	LAR	0.75	0.125	0.875	0.760345	LAR
62	32	female	0	0	0	0	0	0.333333	0.333333	0.333333	LAR	0	0.458333	0.458333	0.458333	LAR
67	6	female	0	1	1	1	0	0	0	0	LDA	0	0	0	0	LDA
82	43	female	1	1	0	0	0	0.166667	0.166667	0.166667	EVN	0.05	0.166667	0.116667	0.174005	EVN
74	8	male	1	1	0	0	0	0	0	0	LDA	0	0	0	0	LDA
65	6	female	1	0	0	0	0	0	0	0	LDA	0	0	0	0	LDA
60	8	female	1	1	1	1	0.125	0	0.125	0.125	EVN	0.225	0.125	0.15	0.257391	EVN
26	6	female	1	0	1	1	0	0	0	0	LDA	0	0	0	0	LDA
65	8	female	1	1	0	0	0	0	0	0	LDA	0	0	0	0	LDA
45	8	female	1	1	1	1	0	0.619048	0.619048	0.619048	LAR	0	0.583333	0.583333	0.583333	LAR
58	6	male	1	1	0	0	0	0	0	0	LDA	0	0	0	0	LDA
70	8	female	1	1	0	0	0	0	0	0	LDA	0	0	0	0	LDA
64	6	female	1	1	0	1	0.7	0.125	-0.075	0.711073	EVN	0	0	0	0	LDA
72	7	female	1	1	0	0	0.05	0	-0.05	0.05	LDA	0.05	0	-0.05	0.05	LDA
58	17	male	1	1	1	1	0	0	0	0	LDA	0	0	0	0	LDA
46	6	male	1	1	0	0	0.1	0	-0.1	0.1	EVN	0.275	0.35	0.125	0.445112	EVN
66	0	female	1	1	0	0	0.1	0	-0.1	0.1	EVN	0.15	0	-0.15	0.15	EVN
22	6	female	0	0	1	1	0	0	0	0	LDA	0	0	0	0	LDA
69	6	female	1	1	0	0	0.125	0	0.125	0.125	EVN	0.125	0	0.125	0.125	EVN
73	7	female	1	1	0	0	0	0	0	0	LDA	0	0	0	0	LDA
40	13	female	0	0	0	0	0.25	0	-0.25	0.25	SML	0.15	0	-0.15	0.15	EVN
57	6	male	0	0	1	1	0.625	0	0.125	0.625	EVN	0	0	0	0	LDA
79	17	female	0	0	1	1	0	0.333333	0.333333	0.333333	LAR	0	0	0	0	LDA
74	7	male	0	0	0	0	0	0	0	0	LDA	0.125	0	0.125	0.125	EVN
64	11	female	1	1	0	0	0	0.2	-0.2	0.2	SML	0	0	0	0	LDA
69	14	female	1	1	0	0	0.285714	0	0.285714	0.285714	LAR	0.1	0	-0.1	0.1	EVN
61	8	female	0	0	0	0	0	0	0	0	LDA	0	0	0	0	LDA
72	11	male	0	0	0	0	0	0	0	0	LDA	0.375	0	0.375	0.375	LAR
73	15	female	0	0	0	0	0	0.833333	0.833333	0.833333	LAR	0	0.833333	0.833333	0.833333	LAR
80	9	female	1	1	0	0	0	0	0	0	LDA	0.125	0	0.125	0.125	EVN
64	6	male	0	0	0	0	0	0	0	0	LDA	0	0	0	0	LDA
63	7	male	1	1	0	0	0.15	0	-0.15	0.15	EVN	0	0	0	0	LDA
84	33	female	0	0	0	0	0	0.25	0.25	0.25	LAR	0	0	0	0	LDA
71	31	male	1	1	0	0	0.125	0	0.125	0.125	EVN	0	0	0	0	LDA
70	41	female	1	1	0	0	0.15	0.291667	0.141667	0.327978	EVN	0.4	0.291667	0.391667	0.495045	LAR
84	4	female	1	1	0	0	0.15	0	-0.15	0.15	EVN	0.25	0.125	-0.125	0.279508	EVN
74	20	female	1	1	0	0	0	0	0	0	LDA	0	0	0	0	LDA
46	8	female	1	1	0	0	0.1	0	-0.1	0.1	EVN	0.15	0	-0.15	0.15	EVN
64	1	female	0	0	0	0	0	0	0	0	LDA	0.125	0	0.125	0.125	EVN
55	6	female	1	1	0	0	0	0	0	0	LDA	0	0	0	0	LDA
55	6	female	1	1	0	0	0	0	0	0	LDA	0	0	0	0	LDA
76	6	male	1	1	0	0	0	0	0	0	LDA	0	0	0	0	LDA
52	10	female	1	1	0	0	0.25	0	0.25	0.25	LAR	0.5	0	-7.45058e-09	0.5	EVN
71	6	female	1	1	0	0	0	0	0	0	LDA	0	0	0	0	LDA
77	15	female	1	1	0	0	0.05	0	-0.05	0.05	LDA	0	0	0	0	LDA
44	6	female	1	1	0	1	0.525	0.125	0.35	0.539676	LAR	0.4	0	0.1	0.4	EVN
86	3	female	0	0	0	0	0.125	0	0.125	0.125	EVN	0.35	0.125	0.275	0.371652	LAR
62	6	female	1	1	0	0	0	0.125	0.125	0.125	EVN	0	0	0	0	LDA
29	6	female	1	0	0	0	0	0	0	0	LDA	0	0	0	0	LDA
63	6	female	1	1	0	0	0.05	0	-0.05	0.05	LDA	0.05	0	-0.05	0.05	LDA
63	6	male	1	1	0	0	0.4	0.416667	0.516667	0.577591	LAR	0.575	0	-0.325	0.575	SML
30	6	female	1	1	1	1	0	0	0	0	LDA	0	0	0	0	LDA
66	6	female	1	1	0	0	0.1	0	-0.1	0.1	EVN	0	0	0	0	LDA
64	3	female	1	1	0	0	0	0.142857	0.142857	0.142857	EVN	0	0	0	0	LDA
20	6	female	0	0	1	1	0	0	0	0	LDA	0	0	0	0	LDA
58	23	male	0	0	1	1	0.25	0	0.25	0.25	LAR	0.375	0	0.375	0.375	LAR
83	6	female	1	1	0	0	0.125	0	0.125	0.125	EVN	0	0	0	0	LDA
71	11	female	1	1	0	0	0	0	0	0	LDA	0.3	0	-0.3	0.3	SML
57	6	female	1	1	0	0	0.375	0.166667	0.541667	0.410369	LAR	0.25	0.166667	0.416667	0.300463	LAR
48	6	female	0	0	1	1	0	0	0	0	LDA	0.125	0	0.125	0.125	EVN
71	37	female	0	0	0	0	0.75	0	0.75	0.75	LAR	0.75	0	0.75	0.75	LAR
61	8	male	0	0	0	0	0.1	0	-0.1	0.1	EVN	0	0	0	0	LDA
39	6	female	1	1	0	0	0	0	0	0	LDA	0	0	0	0	LDA
42	6	female	1	1	0	0	0	0.291667	0.291667	0.291667	LAR	0	0.25	0.25	0.25	LAR
33	14	female	1	1	1	1	0.5	0.3	0.2	0.583095	EVN	0.5	0.25	0.75	0.559017	LAR
66	6	female	1	1	0	0	0.175	0	0.075	0.175	EVN	0.05	0	-0.05	0.05	LDA
62	5	male	1	1	0	0	0.25	0.25	0.5	0.353553	LAR	0	0.583333	0.583333	0.583333	LAR
65	5	female	1	1	0	0	0.25	0	0.25	0.25	LAR	0	0	0	0	LDA
54	6	female	1	1	0	0	0	0	0	0	LDA	0	0	0	0	LDA
76	8	female	0	0	0	0	0	0	0	0	LDA	0	0	0	0	LDA
66	5	female	0	0	0	0	0	0	0	0	LDA	0	0	0	0	LDA
57	7	female	1	1	0	0	0.25	0	0.25	0.25	LAR	0.125	0	0.125	0.125	EVN
76	25	female	1	1	0	1	0.125	0.125	0.25	0.176777	LAR	0	0.125	0.125	0.125	EVN
61	3	female	1	1	0	0	0	0	0	0	LDA	0	0.125	0.125	0.125	EVN
43	5	female	1	1	1	1	0.55	0	-0.05	0.55	EVN	0.2	0	-0.2	0.2	SML
71	18	female	1	0	0	0	0.3	0.3	-0.1	0.424264	EVN	0.375	0	0.375	0.375	LAR
70	7	female	0	0	0	0	0	0	0	0	LDA	0	0	0	0	LDA
51	5	male	1	1	0	0	0	0	0	0	LDA	0	0	0	0	LDA
64	6	female	0	0	0	0	0	0	0	0	LDA	0	0	0	0	LDA
67	23	female	1	1	0	0	0.125	0	0.125	0.125	EVN	0	0	0	0	LDA
78	17	female	0	0	0	0	0.125	0	0.125	0.125	EVN	0	0.125	0.125	0.125	EVN
55	5	female	0	0	0	0	0.05	0.375	0.325	0.378319	LAR	0.35	0.5	0.15	0.610328	EVN
47	5	female	0	0	0	0	0.1	0.325	-0.175	0.340037	EVN	0.225	0.566667	-0.208333	0.609702	SML
43	6	female	1	1	0	0	0.25	0	0.25	0.25	LAR	0.125	0	0.125	0.125	EVN
59	27	female	1	1	0	0	0	0	0	0	LDA	0	0	0	0	LDA
74	6	female	1	1	0	0	0	0	0	0	LDA	0	0	0	0	LDA
71	15	female	0	0	0	0	0.25	0	0.25	0.25	LAR	0.45	0.166667	0.216667	0.479873	LAR
70	5	male	1	1	0	0	0.25	0	0.25	0.25	LAR	0.125	0.1	0.025	0.160078	EVN
74	5	female	1	1	0	0	0.175	0.166667	0.241667	0.241667	LAR	0	0.125	0.125	0.125	EVN
60	26	male	0	0	1	1	0.75	0.25	1	0.790569	LAR	0.225	0.125	0.15	0.257391	EVN
79	5	male	1	1	0	0	1.225	0.25	0.275	1.25025	LAR	0.25	0	0.25	0.25	LAR
70	5	female	1	1	0	0	0	0	0	0	LDA	0.1	0	-0.1	0.1	EVN
73	25	female	0	0	0	0	0	0	0	0	LDA	0	0	0	0	LDA
46	28	female	0	0	1	1	0.75	0	0.75	0.75	LAR	0	0	0	0	LDA
57	5	female	1	1	1	1	0	0	0	0	LDA	0	0	0	0	LDA
78	2	female	1	1	0	0	0	0	0	0	LDA	0	0	0	0	LDA
54	12	female	1	1	0	0	0.5	0.6	-0.6	0.781025	SML	0	0.6	-0.6	0.6	SML
43	5	female	1	1	0	0	0.4	0	-0.4	0.4	SML	0	0	0	0	LDA
82	9	female	0	0	0	0	0.65	0.5	0.35	0.820061	LAR	1.225	0.25	0.275	1.25025	LAR
65	6	female	1	1	0	0	0.375	0	0.375	0.375	LAR	0.55	0.25	0.7	0.604152	LAR
70	29	male	1	1	0	0	0	0	0	0	LDA	0	0	0	0	LDA
61	16	female	1	1	0	0	0	0	0	0	LDA	0.125	0	0.125	0.125	EVN
51	5	female	1	1	0	0	0	0.583333	0.583333	0.583333	LAR	0.25	0.416667	0.666667	0.485913	LAR
78	5	female	1	1	0	0	0	0	0	0	LDA	0	0	0	0	LDA
39	5	female	0	0	0	0	0	0	0	0	LDA	0	0	0	0	LDA
60	9	female	1	1	0	0	0	0	0	0	LDA	0	0	0	0	LDA
66	5	male	0	0	0	0	0.25	0	0.25	0.25	LAR	0	0	0	0	LDA
42	5	female	0	0	0	0	0	0	0	0	LDA	1.1	0.291667	0.191667	1.13801	EVN
59	10	female	1	1	0	0	0.5	0	0.5	0.5	LAR	0	0.5	0.5	0.5	LAR
67	5	female	0	0	0	0	0.125	0	0.125	0.125	EVN	0.25	0	0.25	0.25	LAR
65	5	female	1	1	0	0	0	0	0	0	LDA	0	0.125	0.125	0.125	EVN
39	5	female	1	1	0	0	0.375	0	0.375	0.375	LAR	0	0	0	0	LDA
56	6	female	0	0	1	1	0.25	0	0.25	0.25	LAR	0	0	0	0	LDA
92	5	female	0	0	0	0	0.1	0	-0.1	0.1	EVN	0	0	0	0	LDA
79	29	female	1	1	0	0	0	0	0	0	LDA	0	0	0	0	LDA
82	5	female	0	0	0	0	0	0	0	0	LDA	0	0	0	0	LDA
81	5	male	1	1	0	0	0	0	0	0	LDA	0	0	0	0	LDA
66	6	male	1	1	0	0	0.25	0.4	-0.15	0.471699	EVN	0.1	0.8	-0.9	0.806226	SML
73	1	male	1	1	0	0	0	0	0	0	LDA	0	0	0	0	LDA
76	5	female	1	1	0	0	0.1	0	-0.1	0.1	EVN	0.15	0	-0.15	0.15	EVN
42	5	female	1	1	0	0	1.225	0.375	1.4	1.28111	LAR	0	0	0	0	LDA
67	10	female	1	1	0	0	0	0	0	0	LDA	0	0	0	0	LDA
37	5	female	0	0	0	0	0	0	0	0	LDA	0	0	0	0	LDA
70	5	male	1	1	0	0	0.375	0.125	0.5	0.395285	LAR	0.175	0	0.075	0.175	EVN
66	5	female	0	0	0	0	0	0	0	0	LDA	0.25	0	0.25	0.25	LAR
62	5	female	0	1	0	0	0	0	0	0	LDA	0	0	0	0	LDA
73	4	male	0	0	1	1	0	0	0	0	LDA	0	0	0	0	LDA
63	38	female	0	0	0	0	0.125	0	0.125	0.125	EVN	0.125	0	0.125	0.125	EVN
75	8	female	0	0	0	0	0.125	0.125	0.25	0.176777	LAR	0.375	0	0.375	0.375	LAR
65	40	female	1	1	0	0	0.2	0.125	-0.075	0.23585	EVN	0.05	0	-0.05	0.05	LDA
66	4	male	0	0	0	0	0	0	0	0	LDA	0	0	0	0	LDA
62	7	male	1	1	0	0	0	0	0	0	LDA	0	0.166667	0.166667	0.166667	EVN
73	16	female	0	1	0	0	0.25	0	0.25	0.25	LAR	0.125	0	0.125	0.125	EVN
53	11	female	1	1	0	0	0.1	0	-0.1	0.1	EVN	0	0	0	0	LDA
67	4	male	1	1	0	0	0.1	0	-0.1	0.1	EVN	0	0	0	0	LDA
61	5	male	1	1	0	0	0.2	0	-0.2	0.2	SML	0.35	0	0.15	0.35	EVN
73	5	female	1	1	0	0	0.125	0.25	0.375	0.279508	LAR	0.125	0.125	0.25	0.176777	LAR
75	5	female	1	1	0	0	0.1	0	-0.1	0.1	EVN	0.3	0	-0.3	0.3	SML
66	4	male	1	1	0	0	0	0	0	0	LDA	0.25	0	0.25	0.25	LAR
60	8	female	1	1	0	0	0.75	0.25	0.5	0.790569	LAR	0.05	0.125	0.075	0.134629	EVN
65	28	female	1	1	0	0	0.2	0	-0.2	0.2	SML	0.225	0	0.025	0.225	EVN
73	5	male	0	0	0	0	0.425	0.25	0.575	0.493077	LAR	0.1	0	-0.1	0.1	EVN
79	6	female	0	0	1	1	0.2	0.333333	0.133333	0.38873	EVN	0.15	0.333333	0.183333	0.365529	EVN
63	2	male	0	1	0	0	0.4	0.416667	0.0166667	0.577591	EVN	0	0	0	0	LDA
77	9	female	1	1	0	0	0.25	0	0.25	0.25	LAR	0	0	0	0	LDA
71	4	female	1	1	0	0	0	0	0	0	LDA	0	0	0	0	LDA
62	5	female	1	1	0	0	0.35	0	0.15	0.35	EVN	0.125	0	0.125	0.125	EVN
61	8	female	1	1	0	0	0.125	0	0.125	0.125	EVN	0.25	0	0.25	0.25	LAR
84	8	female	0	0	0	0	0.125	0	0.125	0.125	EVN	0.125	0.25	0.375	0.279508	LAR
40	6	female	0	1	0	0	0.425	0.25	0.575	0.493077	LAR	0.475	0.125	0.4	0.491172	LAR
60	9	female	1	1	0	0	0	0	0	0	LDA	0	0	0	0	LDA
68	11	female	0	0	0	0	0.25	0	0.25	0.25	LAR	0.25	0	0.25	0.25	LAR
81	14	male	0	0	1	1	0.25	0	0.25	0.25	LAR	0	0	0	0	LDA
71	4	female	1	0	0	0	1.55	1.42857	-0.621429	2.10792	SML	0	0	0	0	LDA
78	6	female	1	1	0	0	0	0	0	0	LDA	0.125	0	0.125	0.125	EVN
82	6	female	1	1	0	0	0.45	0.125	0.175	0.467039	EVN	0	0	0	0	LDA
19	4	female	1	1	1	1	0.15	0	-0.15	0.15	EVN	0.4	0	0.1	0.4	EVN
65	11	male	1	1	0	0	0	0.1	-0.1	0.1	EVN	0	0	0	0	LDA
61	6	female	1	1	0	0	0.125	0	0.125	0.125	EVN	0.125	0	0.125	0.125	EVN
61	4	female	1	1	0	1	0.725	1.5	-0.475	1.66602	SML	1.275	1.375	-1.15	1.87517	SML
79	12	female	0	0	0	0	0	0	0	0	LDA	0.25	0	0.25	0.25	LAR
66	11	male	0	0	1	1	0	0	0	0	LDA	0	0	0	0	LDA
59	4	female	0	0	0	0	0.125	0	0.125	0.125	EVN	0.25	0	0.25	0.25	LAR
66	15	male	1	1	0	0	0.1	0.142857	0.0428571	0.174379	EVN	0.45	0.125	0.175	0.467039	EVN
68	4	female	1	1	0	1	0.25	0.166667	0.416667	0.300463	LAR	0.25	0.333333	0.583333	0.416667	LAR
63	14	female	1	1	1	0	0	0	0	0	LDA	0.125	0	0.125	0.125	EVN
43	4	female	1	1	1	1	0.65	0	-0.15	0.65	EVN	0	0	0	0	LDA
72	20	female	0	0	0	0	0	0	0	0	LDA	0	0	0	0	LDA
59	4	female	1	1	0	0	0	0	0	0	LDA	0	0	0	0	LDA
69	4	male	1	1	0	1	0.05	0.25	0.2	0.254951	EVN	0.35	0	0.15	0.35	EVN
71	31	female	1	1	0	0	0	0	0	0	LDA	0	0	0	0	LDA
68	4	female	0	0	0	0	0	0	0	0	LDA	0.125	0.1	0.025	0.160078	EVN
51	4	female	0	1	0	0	0	0	0	0	LDA	0	0	0	0	LDA
81	4	male	0	0	0	0	0	0	0	0	LDA	0	0	0	0	LDA
54	19	female	1	1	1	1	0.25	0	0.25	0.25	LAR	0.125	0	0.125	0.125	EVN
72	13	female	1	1	0	0	0	0	0	0	LDA	0.1	0	-0.1	0.1	EVN
53	4	male	1	1	1	1	0.6	0	0.4	0.6	LAR	0	0	0	0	LDA
32	7	female	0	0	1	1	0.125	0	0.125	0.125	EVN	0.8	0	0.7	0.8	LAR
54	6	male	1	1	0	0	0.25	0	0.25	0.25	LAR	0.125	0	0.125	0.125	EVN
60	4	female	1	1	0	0	0.1	0	-0.1	0.1	EVN	0.1	0	-0.1	0.1	EVN
53	9	female	1	1	0	0	0	0	0	0	LDA	0	0	0	0	LDA
82	8	female	1	1	1	0	0	0	0	0	LDA	0	0	0	0	LDA
64	1	female	1	1	0	0	0.05	0.166667	0.116667	0.174005	EVN	0	0	0	0	LDA
76	4	female	1	1	0	0	0	0	0	0	LDA	0	0	0	0	LDA
79	13	female	1	1	0	0	0	0	0	0	LDA	0	0	0	0	LDA
49	46	female	1	1	0	0	0.5	0.333333	0.833333	0.600925	LAR	0.5	0.333333	0.833333	0.600925	LAR
61	5	male	1	1	0	0	0	0	0	0	LDA	0.25	0	0.25	0.25	LAR
45	27	female	0	0	0	0	0.1	0	-0.1	0.1	EVN	0.1	0	-0.1	0.1	EVN
74	4	female	1	1	1	1	0	0	0	0	LDA	0	0.125	0.125	0.125	EVN
81	21	female	0	0	0	0	0	0	0	0	LDA	0	0	0	0	LDA
46	4	female	1	1	1	1	0.95	1.70833	-0.241667	1.95471	SML	1	1.40833	0.00833336	1.72725	EVN
63	20	male	1	1	1	1	0	0	0	0	LDA	0.3	1	-0.8	1.04403	SML
43	10	female	1	1	1	1	0	0	0	0	LDA	0	0	0	0	LDA
67	9	female	1	1	0	0	0	0	0	0	LDA	0.375	0	0.375	0.375	LAR
20	4	male	1	1	0	0	0	0	0	0	LDA	0	0	0	0	LDA
64	5	female	1	1	1	1	0.675	0.416667	-0.00833334	0.793244	EVN	0.175	0	0.075	0.175	EVN
43	4	female	0	0	0	0	0	0	0	0	LDA	0	0	0	0	LDA
66	6	female	0	0	0	0	0	0	0	0	LDA	0	0	0	0	LDA
45	3	female	0	0	0	0	0.475	0	-0.225	0.475	SML	0.225	0	0.025	0.225	EVN
69	4	male	1	1	0	0	0	0	0	0	LDA	0	0	0	0	LDA
75	4	female	1	1	0	0	0	0	0	0	LDA	0	0	0	0	LDA
79	4	female	0	0	0	0	0	0	0	0	LDA	0	0	0	0	LDA
58	1	female	1	1	0	0	0	0	0	0	LDA	0	0	0	0	LDA
66	9	male	0	0	0	0	0	0	0	0	LDA	0	0	0	0	LDA
71	35	female	0	0	1	1	0.292857	0	-0.00714286	0.292857	EVN	0.7	0.25	0.55	0.743303	LAR
39	4	female	1	1	0	1	0.175	0	0.075	0.175	EVN	0.05	0.166667	0.116667	0.174005	EVN
49	4	female	1	1	0	1	0	0	0	0	LDA	0.05	0	-0.05	0.05	LDA
49	4	female	1	1	1	0	0.4	0.125	0.225	0.419076	LAR	0.25	0	0.25	0.25	LAR
74	14	male	1	1	0	0	0.375	0	0.375	0.375	LAR	0.625	0	0.625	0.625	LAR
74	4	female	0	0	0	0	0	0	0	0	LDA	0	0	0	0	LDA
58	21	female	1	1	1	1	0.125	0.583333	0.708333	0.596576	LAR	0.05	0	-0.05	0.05	LDA
79	19	female	1	1	0	0	0.333333	0	0.333333	0.333333	LAR	0.25	0	0.25	0.25	LAR
44	33	female	1	1	0	0	0	0	0	0	LDA	0.125	0	0.125	0.125	EVN
60	8	male	1	1	0	0	0	0	0	0	LDA	0.25	0	0.25	0.25	LAR
66	3	female	0	0	0	0	0	0	0	0	LDA	0	0	0	0	LDA
71	4	female	1	1	0	0	0.1	0.125	0.025	0.160078	EVN	0.1	0.125	0.025	0.160078	EVN
42	3	female	1	1	0	0	0.475	0	0.275	0.475	LAR	0.175	0	0.075	0.175	EVN
65	3	male	1	1	1	1	0.175	0	0.075	0.175	EVN	0.125	0	0.125	0.125	EVN
38	5	female	1	1	1	1	0.225	0	0.025	0.225	EVN	0	0	0	0	LDA
67	4	female	1	1	0	0	0	0	0	0	LDA	0.225	0	0.025	0.225	EVN
69	11	female	1	1	0	0	0	0	0	0	LDA	0	0.125	0.125	0.125	EVN
40	4	female	1	1	0	0	0	0	0	0	LDA	0	0	0	0	LDA
67	23	male	1	1	0	0	0	0	0	0	LDA	0	0	0	0	LDA
72	5	female	1	1	1	1	0	0	0	0	LDA	0	0	0	0	LDA
77	3	male	1	1	0	0	0	0	0	0	LDA	0	0	0	0	LDA
67	6	female	0	0	0	0	0	0	0	0	LDA	0	0	0	0	LDA
66	6	female	1	1	0	0	0	0	0	0	LDA	0	0.2	-0.2	0.2	SML
50	4	female	1	1	0	0	0.1	0	-0.1	0.1	EVN	0	0	0	0	LDA
42	1	female	1	1	0	0	0	0	0	0	LDA	0	0	0	0	LDA
55	1	male	1	1	0	0	0	0	0	0	LDA	0	0	0	0	LDA
57	4	female	1	1	1	0	0.1	0.583333	0.483333	0.591843	LAR	0.05	0.458333	0.408333	0.461053	LAR
46	7	male	1	1	0	0	0	0	0	0	LDA	0	0	0	0	LDA
51	6	male	1	1	0	1	0	0	0	0	LDA	0.375	0	0.375	0.375	LAR
62	3	female	0	0	1	1	0.4	0.591667	-0.408333	0.714191	SML	1.225	1	-1.475	1.58134	SML
70	4	female	1	1	0	0	0	0	0	0	LDA	0.125	0.2	-0.075	0.23585	EVN
47	4	female	0	0	0	0	0.5	0	0.5	0.5	LAR	0.25	0	0.25	0.25	LAR
65	4	female	1	1	0	0	0	0	0	0	LDA	0	0	0	0	LDA
73	0	female	0	0	0	0	0	0	0	0	LDA	0	0	0	0	LDA
47	3	female	1	1	0	0	0	0	0	0	LDA	0.05	0	-0.05	0.05	LDA
78	13	female	0	0	0	0	0.3	0	0.2	0.3	EVN	0.5	0	0.5	0.5	LAR
66	5	female	1	1	1	1	0	0	0	0	LDA	0	0	0	0	LDA
64	3	male	0	0	0	0	0	0	0	0	LDA	0	0	0	0	LDA
62	4	female	0	0	0	0	0	0	0	0	LDA	0	0	0	0	LDA
63	3	female	0	0	0	0	0	0	0	0	LDA	0	0	0	0	LDA
63	3	female	1	1	0	0	0	0	0	0	LDA	0	0	0	0	LDA
46	3	male	0	0	0	0	0	0	0	0	LDA	0	0	0	0	LDA
81	38	female	1	1	0	0	0.125	0	0.125	0.125	EVN	0.125	0	0.125	0.125	EVN
63	3	female	1	1	0	0	0.175	0.2	-0.125	0.265754	EVN	0	0	0	0	LDA
73	20	male	0	0	0	0	0	0	0	0	LDA	0	0	0	0	LDA
58	4	female	1	0	0	0	0.2	0	-0.2	0.2	SML	0	0	0	0	LDA
69	6	male	1	1	0	0	0.25	0.125	0.375	0.279508	LAR	0.125	0	0.125	0.125	EVN
39	3	male	1	1	0	0	0	0	0	0	LDA	0	0	0	0	LDA
50	30	female	0	0	0	0	0.5	0	0.5	0.5	LAR	0	0	0	0	LDA
72	6	male	1	1	0	0	1.25	0.783333	0.633333	1.47516	LAR	0.925	0.325	0.25	0.980434	LAR
65	42	female	0	0	1	1	0.05	0	-0.05	0.05	LDA	0.1	0	-0.1	0.1	EVN
68	3	female	1	1	0	0	0	0	0	0	LDA	0	0	0	0	LDA
83	3	female	1	0	0	0	0.3	0.375	0.075	0.480234	EVN	0.125	0.125	0.25	0.176777	LAR
70	5	male	1	1	0	0	0	0	0	0	LDA	0.1	0	-0.1	0.1	EVN
56	23	female	1	1	0	0	0.25	0.75	1	0.790569	LAR	0	0	0	0	LDA
66	5	female	1	1	0	0	0	0.1	-0.1	0.1	EVN	0.35	0.1	0.05	0.364005	EVN
62	3	female	1	1	0	0	0.25	0.2	0.45	0.320156	LAR	0	0.291667	0.291667	0.291667	LAR
42	3	male	1	1	0	0	0	0	0	0	LDA	0	0	0	0	LDA
65	3	female	1	1	0	0	0	0	0	0	LDA	0	0	0	0	LDA
56	8	male	0	0	0	0	0.125	0	0.125	0.125	EVN	0.125	0	0.125	0.125	EVN
32	13	female	1	0	1	1	0.335714	0.125	0.360714	0.35823	LAR	0.225	0.125	0.15	0.257391	EVN
54	3	female	1	1	0	0	0.125	0	0.125	0.125	EVN	0	0	0	0	LDA
35	3	female	0	0	1	0	0.1	0	-0.1	0.1	EVN	0	0	0	0	LDA
63	3	female	1	1	0	0	0	0	0	0	LDA	0.475	0	0.275	0.475	LAR
43	3	male	0	0	0	0	0	0	0	0	LDA	0	0	0	0	LDA
67	3	male	0	0	0	0	0	0	0	0	LDA	0	0	0	0	LDA
45	3	female	1	1	0	0	0	0	0	0	LDA	0	0	0	0	LDA
64	30	female	0	0	0	0	0.285714	0	0.285714	0.285714	LAR	0.25	0	0.25	0.25	LAR
68	4	female	1	1	0	0	0.6	0.375	0.775	0.707549	LAR	0.125	0.25	0.375	0.279508	LAR
34	3	female	1	1	1	1	0.125	0	0.125	0.125	EVN	0.25	0	0.25	0.25	LAR
70	4	female	1	1	0	0	0.05	0	-0.05	0.05	LDA	0	0.125	0.125	0.125	EVN
66	4	female	1	1	0	0	0	0	0	0	LDA	0	0	0	0	LDA
54	3	female	1	1	0	0	0	0	0	0	LDA	0.6	0	-0.6	0.6	SML
58	3	female	1	1	0	0	0.05	0	-0.05	0.05	LDA	0	0	0	0	LDA
42	4	female	0	0	0	0	0	0	0	0	LDA	0	0	0	0	LDA
63	3	female	1	1	0	0	0	0.125	0.125	0.125	EVN	0.35	0	0.15	0.35	EVN
72	22	female	0	0	0	0	0.25	0.25	0.5	0.353553	LAR	0	0	0	0	LDA
71	6	female	0	0	0	0	0	0	0	0	LDA	0	0	0	0	LDA
63	3	female	1	1	0	0	0	0	0	0	LDA	0	0	0	0	LDA
66	3	male	0	0	0	0	0	0	0	0	LDA	0	0	0	0	LDA
59	3	male	1	1	1	1	0	0	0	0	LDA	0	0	0	0	LDA
71	6	female	0	0	1	1	0	0	0	0	LDA	0	0.125	0.125	0.125	EVN
55	6	female	1	1	0	0	0.15	0	-0.15	0.15	EVN	0.45	0	0.05	0.45	EVN
86	3	male	1	1	0	0	0	0	0	0	LDA	0	0	0	0	LDA
64	5	female	1	1	0	0	0.125	0	0.125	0.125	EVN	0	0	0	0	LDA
44	3	female	1	1	0	0	0	0	0	0	LDA	0.25	0	0.25	0.25	LAR
71	9	male	1	1	0	0	0.3	0	0.2	0.3	EVN	0.05	0	-0.05	0.05	LDA
58	4	male	1	1	0	0	0	0	0	0	LDA	0	0	0	0	LDA
56	2	male	0	0	0	0	0.05	0	-0.05	0.05	LDA	0	0	0	0	LDA
53	7	male	1	1	0	0	0	0	0	0	LDA	0	0	0	0	LDA
76	2	female	1	1	0	0	0.25	0.416667	0.666667	0.485913	LAR	0	0	0	0	LDA
67	2	female	1	1	0	1	0.2	0	-0.2	0.2	SML	0.35	0.266667	-0.283333	0.440013	SML
66	5	female	1	1	0	0	0	0	0	0	LDA	0	0	0	0	LDA
40	3	female	0	0	1	1	0.15	0	-0.15	0.15	EVN	0.15	0	-0.15	0.15	EVN
71	3	female	1	1	0	0	0.175	0	0.075	0.175	EVN	0	0	0	0	LDA
50	17	female	0	1	1	1	0.375	0.416667	0.791667	0.560568	LAR	0.375	0.416667	0.791667	0.560568	LAR
77	2	female	1	1	0	0	0	0	0	0	LDA	0	0	0	0	LDA
54	2	male	1	1	0	0	0.05	0.1	-0.15	0.111803	EVN	0	0	0	0	LDA
63	27	female	1	1	0	0	0.142857	0	0.142857	0.142857	EVN	0.125	0	0.125	0.125	EVN
55	38	female	0	0	0	0	0.242857	0	0.0428571	0.242857	EVN	0.625	0.166667	0.291667	0.646841	LAR
60	2	female	1	1	0	0	0	0	0	0	LDA	0	0	0	0	LDA
71	16	female	1	1	0	0	0.125	0	0.125	0.125	EVN	0	0	0	0	LDA
65	1	male	0	0	0	0	0	0.225	0.025	0.225	EVN	0.175	0	0.075	0.175	EVN
52	2	female	1	1	0	0	0	0	0	0	LDA	0	0	0	0	LDA
53	9	female	1	1	0	0	0.475	0	0.275	0.475	LAR	0.1	0	-0.1	0.1	EVN
81	2	male	1	1	0	0	0	0	0	0	LDA	0	0	0	0	LDA
41	9	male	1	1	0	0	0.225	0	0.025	0.225	EVN	0.25	0	0.25	0.25	LAR
70	3	female	1	1	0	0	0	0	0	0	LDA	0	0	0	0	LDA
44	2	female	1	1	0	0	0	0	0	0	LDA	0	0	0	0	LDA
49	3	female	1	1	0	0	0.125	0	0.125	0.125	EVN	0.5	0	0.5	0.5	LAR
47	7	female	1	1	0	1	0	0	0	0	LDA	0	0	0	0	LDA
55	2	female	1	1	0	0	0	0	0	0	LDA	0	0	0	0	LDA
66	13	female	1	0	0	0	0	0	0	0	LDA	0	0	0	0	LDA
31	3	female	1	1	1	1	0	0	0	0	LDA	0.375	0.125	0.5	0.395285	LAR
69	3	female	0	0	0	0	0.375	0	-0.125	0.375	EVN	0.4	0	0.1	0.4	EVN
65	2	male	1	1	0	0	0.85	0	-0.35	0.85	SML	0.95	0.166667	0.216667	0.964509	LAR
39	4	male	1	1	0	0	0.25	0	0.25	0.25	LAR	0	0	0	0	LDA
82	3	female	1	1	0	0	0	0	0	0	LDA	0	0	0	0	LDA
66	9	male	0	0	1	1	0	0	0	0	LDA	0	0	0	0	LDA
53	16	female	0	0	0	0	0	0	0	0	LDA	0.25	0	0.25	0.25	LAR
76	33	male	1	1	0	0	0.125	0	0.125	0.125	EVN	0.25	0	0.25	0.25	LAR
61	12	female	1	1	0	0	0.125	0	0.125	0.125	EVN	0	0	0	0	LDA
34	3	female	0	0	0	0	0	0	0	0	LDA	0	0	0	0	LDA
73	32	male	0	0	0	0	0.05	0	-0.05	0.05	LDA	0.3	0	-0.3	0.3	SML
33	3	female	0	0	0	0	0	0	0	0	LDA	0.125	0	0.125	0.125	EVN
59	3	female	1	1	0	0	0.05	0	-0.05	0.05	LDA	0	0	0	0	LDA
62	2	female	0	0	1	1	0.45	0	0.05	0.45	EVN	0.125	0	0.125	0.125	EVN
75	14	female	0	0	0	0	0.05	0	-0.05	0.05	LDA	0.3	0	-0.3	0.3	SML
45	7	female	1	0	0	0	0	0	0	0	LDA	0	0	0	0	LDA
68	5	female	0	1	0	0	0.175	0	0.075	0.175	EVN	0.375	0.2	-0.325	0.425	SML
68	5	female	1	1	0	0	0	0	0	0	LDA	0	0	0	0	LDA
53	3	female	1	1	0	0	0	0	0	0	LDA	0	0	0	0	LDA
71	2	female	1	1	0	0	0	0	0	0	LDA	0	0	0	0	LDA
62	2	female	1	1	0	0	0	0	0	0	LDA	0	0	0	0	LDA
62	5	female	0	0	0	1	0.375	0.125	0	0.395285	EVN	0.45	0	0.05	0.45	EVN
63	7	female	1	1	0	0	0.125	0	0.125	0.125	EVN	0.125	0	0.125	0.125	EVN
71	34	female	1	1	0	0	0.35	0	0.15	0.35	EVN	0.65	0	0.35	0.65	LAR
65	6	female	0	0	0	0	0.25	0.25	0.5	0.353553	LAR	0	0	0	0	LDA
63	2	female	1	1	0	0	0	0	0	0	LDA	0	0	0	0	LDA
65	0	female	1	1	0	0	0.25	0.2	-0.45	0.320156	SML	0.15	0	-0.15	0.15	EVN
72	2	female	0	1	1	1	0	0	0	0	LDA	0	0	0	0	LDA
69	4	female	0	0	1	1	0	0.333333	0.333333	0.333333	LAR	0	0	0	0	LDA
85	9	female	0	0	0	0	0	0	0	0	LDA	0.1	0.125	0.025	0.160078	EVN
75	2	female	0	0	0	0	0.25	0	0.25	0.25	LAR	0	0	0	0	LDA
69	2	female	1	1	0	0	0.05	0	-0.05	0.05	LDA	0	0	0	0	LDA
47	2	female	1	1	0	0	0.15	0.225	-0.125	0.270416	EVN	0	0	0	0	LDA
45	1	male	1	1	0	0	0	0	0	0	LDA	0	0	0	0	LDA
73	16	female	1	1	1	1	0.25	0	0.25	0.25	LAR	0.125	0.166667	0.291667	0.208333	LAR
72	2	female	0	1	0	0	0	0	0	0	LDA	0	0	0	0	LDA
64	4	female	1	0	1	1	0	0	0	0	LDA	0	0	0	0	LDA
74	15	female	0	0	0	0	0	0	0	0	LDA	0	0	0	0	LDA
68	3	female	1	1	0	0	0	0.25	0.25	0.25	LAR	0.05	0	-0.05	0.05	LDA
55	2	female	0	1	0	0	0.225	0.425	-0.15	0.480885	EVN	0.25	0	0.25	0.25	LAR
72	2	female	1	1	0	0	0	0	0	0	LDA	0	0	0	0	LDA
78	2	female	0	0	0	0	0.125	0	0.125	0.125	EVN	0	0	0	0	LDA
42	3	female	0	0	0	0	0	0	0	0	LDA	0	0	0	0	LDA
50	2	male	0	0	0	0	0.675	1	-0.925	1.20649	SML	0.525	0	-0.275	0.525	SML
38	2	female	0	0	1	1	0.125	0	0.125	0.125	EVN	0.15	0	-0.15	0.15	EVN
73	1	male	0	0	0	0	0.15	0	-0.15	0.15	EVN	0.125	0	0.125	0.125	EVN
55	2	male	0	0	0	0	0	0	0	0	LDA	0	0	0	0	LDA
72	2	female	0	1	1	1	0.25	0	0.25	0.25	LAR	0.125	0	0.125	0.125	EVN
67	2	female	1	1	0	0	0	0	0	0	LDA	0	0	0	0	LDA
52	2	female	1	1	0	0	0.1	0	-0.1	0.1	EVN	0.2	0	-0.2	0.2	SML
49	2	female	1	1	0	0	0	0	0	0	LDA	0	0	0	0	LDA
75	17	male	1	1	0	0	0	0	0	0	LDA	0	0	0	0	LDA
65	38	female	1	1	0	0	0.125	0.125	0.25	0.176777	LAR	0.125	0	0.125	0.125	EVN
66	2	female	1	1	0	0	0	0	0	0	LDA	0	0	0	0	LDA
70	14	female	1	1	1	1	0.3	0.291667	0.491667	0.418413	LAR	0.125	0	0.125	0.125	EVN
59	8	male	1	1	0	0	0.125	0.125	0.25	0.176777	LAR	0	0	0	0	LDA
35	2	female	0	0	0	0	0.75	0	0.75	0.75	LAR	0.5	0	0.5	0.5	LAR
67	2	female	0	0	0	0	0.175	0	0.075	0.175	EVN	0.175	0	0.075	0.175	EVN
66	2	female	1	1	0	0	0	0	0	0	LDA	0	0	0	0	LDA
74	1	female	0	0	0	0	0.1	0	-0.1	0.1	EVN	0	0.166667	0.166667	0.166667	EVN
43	3	female	1	1	1	1	0.4	0.1	-7.45058e-09	0.412311	EVN	0.05	0	-0.05	0.05	LDA
80	1	female	1	1	0	0	0	0	0	0	LDA	0	0	0	0	LDA
52	2	male	1	1	0	0	0	0	0	0	LDA	0	0	0	0	LDA
53	2	female	1	0	0	0	0	0	0	0	LDA	0	0	0	0	LDA
61	6	male	1	1	0	0	0	0	0	0	LDA	0	0	0	0	LDA
30	2	female	0	0	0	0	0	0	0	0	LDA	0	0	0	0	LDA
85	9	male	1	1	0	0	0	0	0	0	LDA	0	0.125	0.125	0.125	EVN
63	1	female	1	1	0	0	0	0	0	0	LDA	0	0	0	0	LDA
41	10	female	1	1	0	1	0.65	1.31667	0.866667	1.46837	LAR	0.3	0.416667	0.116667	0.513431	EVN
38	2	female	1	1	0	0	0.1	0	-0.1	0.1	EVN	0.1	0	-0.1	0.1	EVN
72	2	female	0	0	1	1	0.375	0	0.375	0.375	LAR	0	0	0	0	LDA
25	2	female	1	1	0	0	0	0	0	0	LDA	0.2	0	-0.2	0.2	SML
77	2	female	1	1	0	0	0.5	0	0.5	0.5	LAR	0	0	0	0	LDA
60	2	female	1	1	0	0	0.5	0.25	0.75	0.559017	LAR	0.25	0	0.25	0.25	LAR
59	21	female	0	0	0	0	0.15	0	-0.15	0.15	EVN	0	0	0	0	LDA
46	6	female	1	1	0	0	0	0	0	0	LDA	0	0	0	0	LDA
42	2	female	1	1	0	0	0.25	0.125	0.375	0.279508	LAR	0	0	0	0	LDA
76	7	female	0	0	0	0	0.65	0	-0.15	0.65	EVN	0.45	0	0.05	0.45	EVN
67	1	male	1	1	0	0	0.5	0.25	0.75	0.559017	LAR	0.625	0	0.625	0.625	LAR
47	2	female	0	0	0	0	0.25	0	0.25	0.25	LAR	0.25	0	0.25	0.25	LAR
62	4	female	0	0	0	0	0.125	0.125	0.25	0.176777	LAR	0.125	0	0.125	0.125	EVN
72	1	female	1	1	0	0	0.1	0	-0.1	0.1	EVN	0.05	0	-0.05	0.05	LDA
45	2	male	1	1	0	0	0	0	0	0	LDA	0.15	0	-0.15	0.15	EVN
33	2	female	0	0	0	0	0.5	0.125	0.625	0.515388	LAR	0	0	0	0	LDA
29	1	male	1	1	0	0	0	0	0	0	LDA	0	0	0	0	LDA
50	2	female	1	1	0	0	0.05	0	-0.05	0.05	LDA	0	0	0	0	LDA
52	9	female	1	1	0	0	0.175	0.166667	0.241667	0.241667	LAR	0	0.166667	0.166667	0.166667	EVN
45	1	female	1	1	1	1	0	0	0	0	LDA	0	0	0	0	LDA
63	1	female	1	1	0	0	0	0	0	0	LDA	0	0	0	0	LDA
72	17	female	1	1	0	0	0.95	0	0.05	0.95	EVN	0	0	0	0	LDA
51	2	male	1	1	0	0	0	0	0	0	LDA	0	0	0	0	LDA
51	10	male	1	1	0	0	0.05	0	-0.05	0.05	LDA	0	0	0	0	LDA
47	1	female	1	1	0	0	0.25	0.2	-0.45	0.320156	SML	0	0	0	0	LDA
69	2	female	1	1	0	0	0	0.166667	0.166667	0.166667	EVN	0	0	0	0	LDA
50	11	female	0	0	1	1	0.25	0	0.25	0.25	LAR	0.25	0	0.25	0.25	LAR
59	1	female	1	1	0	0	0.15	0	-0.15	0.15	EVN	0.15	0	-0.15	0.15	EVN
74	14	female	1	1	0	0	0	0	0	0	LDA	0	0.125	0.125	0.125	EVN
75	1	female	1	1	0	0	0	0	0	0	LDA	0	0	0	0	LDA
69	1	male	1	1	0	0	0.05	0.8	-0.85	0.801561	SML	0	0	0	0	LDA
39	5	female	1	1	0	0	0.1	0	-0.1	0.1	EVN	0.2	0	-0.2	0.2	SML
60	3	female	1	1	1	1	0	0	0	0	LDA	0	1	-1	1	SML
79	1	male	1	1	0	0	0.3	0	0.2	0.3	EVN	0.1	0	-0.1	0.1	EVN
54	15	female	0	0	0	0	0	0	0	0	LDA	0	0.25	0.25	0.25	LAR
75	10	female	1	1	0	0	0.125	0	0.125	0.125	EVN	0	0	0	0	LDA
70	30	female	1	1	0	0	0.25	0.291667	0.541667	0.384148	LAR	0.25	0	0.25	0.25	LAR
52	4	female	0	0	0	0	0	0	0	0	LDA	0	0	0	0	LDA
69	2	female	1	1	0	0	0	0	0	0	LDA	0	0	0	0	LDA
64	4	male	1	1	0	0	0	0	0	0	LDA	0.1	0	-0.1	0.1	EVN
44	2	female	1	1	0	0	0.125	0.125	0.25	0.176777	LAR	0.1	0.85	-0.45	0.855862	SML
64	1	female	0	0	0	0	0	0	0	0	LDA	0	0	0	0	LDA
62	1	female	1	1	0	0	0	0	0	0	LDA	0	0	0	0	LDA
57	1	female	0	0	0	0	0	0	0	0	LDA	0	0	0	0	LDA
38	2	female	0	0	0	0	0.25	0	-0.25	0.25	SML	0.25	0	0.25	0.25	LAR
73	1	female	0	0	0	0	0	0.2	-0.2	0.2	SML	0	0	0	0	LDA
55	12	female	0	0	0	0	0.3	0	0.2	0.3	EVN	0	0	0	0	LDA
64	9	female	1	0	0	0	0.25	0	0.25	0.25	LAR	0	0	0	0	LDA
65	7	female	1	1	1	1	0	0	0	0	LDA	0	0	0	0	LDA
54	7	female	1	0	0	0	0	0	0	0	LDA	0	0	0	0	LDA
45	6	male	1	0	0	0	0.25	0.25	0.5	0.353553	LAR	0.375	0	0.375	0.375	LAR
41	2	female	1	1	0	0	0.25	0	-0.25	0.25	SML	0.75	0.25	0	0.790569	EVN
43	1	male	1	1	1	1	0.05	0	-0.05	0.05	LDA	0	0	0	0	LDA
60	1	male	1	1	0	0	0	0	0	0	LDA	0	0	0	0	LDA
72	4	female	1	1	0	0	0	0	0	0	LDA	0	0	0	0	LDA
36	1	female	1	0	0	1	0.4	0	-0.4	0.4	SML	0.125	0	0.125	0.125	EVN
65	5	female	1	1	1	1	0	0	0	0	LDA	0.25	0	0.25	0.25	LAR
[truncated: 8,207 more rows]

## Sheet: serial registraion 2015-2016
Age (yrs)	Disease duration (yrs)	Sex	2015_MTX (0: non-user, 1: user)	2016_MTX (0: non-user, 1: user)	2015_bDMARDs (0: non-user, 1: user)	2016_bDMARDs (0: non-user, 1: user)	2015_X	2015_Y	2015_Z	2015_|Vxy|	2015_group	2016_X	2016_Y	2016_Z	2016_|Vxy|	2016_group
60	29	male	1	1	0	0	0	0	0	0	LDA	0	0	0	0	LDA
74	2	female	1	1	0	0	0	0	0	0	LDA	0	0	0	0	LDA
85	23	female	0	0	1	1	0	0	0	0	LDA	0.05	0	-0.05	0.05	LDA
51	11	female	0	0	1	1	0	0	0	0	LDA	0	0	0	0	LDA
29	26	female	0	0	1	1	0	0	0	0	LDA	0	0	0	0	LDA
77	10	female	1	1	0	0	0	0.4	-0.4	0.4	SML	0	0	0	0	LDA
74	18	male	0	0	0	0	0	0	0	0	LDA	0	0	0	0	LDA
50	17	female	1	1	1	1	0	0	0	0	LDA	0	0	0	0	LDA
87	15	female	0	0	0	0	0.125	0	0.125	0.125	EVN	0	0	0	0	LDA
41	15	female	1	1	0	0	0.225	0	0.025	0.225	EVN	0	0	0	0	LDA
65	30	female	1	1	0	0	0	0.25	0.25	0.25	LAR	0.25	0	0.25	0.25	LAR
70	13	female	1	1	0	0	0.55	0	0.45	0.55	LAR	0	0	0	0	LDA
72	11	female	1	1	0	0	0	0	0	0	LDA	0	0	0	0	LDA
75	15	female	0	0	0	0	0.325	0	-0.075	0.325	EVN	0	0	0	0	LDA
90	13	female	0	0	1	1	0.4	0	-0.4	0.4	SML	0	0	0	0	LDA
72	37	female	1	1	0	0	0.2	0	-0.2	0.2	SML	0	0	0	0	LDA
52	21	female	0	0	0	0	0	0	0	0	LDA	0	0	0	0	LDA
61	15	female	1	1	0	0	0	0	0	0	LDA	0	0	0	0	LDA
64	11	female	1	1	0	0	0	0	0	0	LDA	0	0	0	0	LDA
69	20	female	0	0	0	0	0	0	0	0	LDA	0	0	0	0	LDA
49	10	female	1	1	1	1	0	0.3	-0.3	0.3	SML	0	0	0	0	LDA
64	4	male	1	1	0	0	0.1	0	-0.1	0.1	EVN	0	0	0	0	LDA
72	32	female	1	1	0	0	0.125	0	0.125	0.125	EVN	0	0	0	0	LDA
66	18	female	1	1	1	1	0	0	0	0	LDA	0	0	0	0	LDA
56	13	female	1	1	0	0	0.3	0	-0.3	0.3	SML	0	0	0	0	LDA
69	8	female	1	1	0	0	0	0	0	0	LDA	0	0	0	0	LDA
79	3	male	1	1	0	0	0	0	0	0	LDA	0	0	0	0	LDA
81	9	female	0	0	1	1	0	1	-1	1	SML	0	0	0	0	LDA
67	8	male	1	1	0	0	0	0	0	0	LDA	0	0	0	0	LDA
82	8	female	1	1	0	0	0	0	0	0	LDA	0	0	0	0	LDA
75	3	male	1	0	0	0	0	0	0	0	LDA	0	0	0	0	LDA
83	3	male	1	1	0	0	0	0	0	0	LDA	0	0	0	0	LDA
40	8	female	0	0	0	0	0.05	0.25	0.2	0.254951	EVN	0	0	0	0	LDA
74	1	female	1	1	0	0	0	0	0	0	LDA	0	0	0	0	LDA
70	15	male	1	1	0	0	0.375	0.291667	0.166667	0.475073	EVN	0.05	0.125	0.075	0.134629	EVN
85	7	male	0	0	0	0	0.725	0.25	0.275	0.766893	LAR	0.95	0	0.05	0.95	EVN
65	8	female	0	0	0	0	0.05	0	-0.05	0.05	LDA	0	0	0	0	LDA
66	8	female	0	0	0	0	0	0	0	0	LDA	0	0.125	0.125	0.125	EVN
47	19	female	1	1	1	1	0	0	0	0	LDA	0	1	-1	1	SML
60	22	female	1	1	0	0	0	0.125	0.125	0.125	EVN	0.05	0.25	0.2	0.254951	EVN
63	39	female	1	1	0	0	0	0.375	0.375	0.375	LAR	0	0.375	0.375	0.375	LAR
77	25	female	0	0	1	1	0.125	0	0.125	0.125	EVN	0.25	0	0.25	0.25	LAR
68	40	female	1	1	0	0	0	0.25	0.25	0.25	LAR	0	1	-1	1	SML
81	40	female	0	0	0	0	0	0	0	0	LDA	0	0	0	0	LDA
58	26	female	1	1	1	1	0.675	0	0.075	0.675	EVN	0.55	0	-0.05	0.55	EVN
74	34	female	0	0	0	0	1.6	0.25	0.15	1.61941	EVN	1.425	0.45	-0.125	1.49436	EVN
74	26	female	0	0	0	0	0.925	0.291667	0.116667	0.969894	EVN	0.35	0.583333	0.233333	0.680278	LAR
62	29	female	0	0	0	0	0.1	0.125	0.025	0.160078	EVN	0	0.25	0.25	0.25	LAR
70	23	female	0	0	1	1	0	0	0	0	LDA	0.3	0	-0.3	0.3	SML
64	23	female	1	1	1	1	0.925	0.416667	0.741667	1.01451	LAR	0.575	0.516667	0.491667	0.773026	LAR
67	1	female	1	1	0	0	0.35	0	0.15	0.35	EVN	0.5	0.25	-0.25	0.559017	SML
86	3	female	0	0	0	0	0	0.125	0.125	0.125	EVN	0	0	0	0	LDA
72	22	male	0	0	1	1	0	0	0	0	LDA	0.25	0	0.25	0.25	LAR
50	4	female	0	0	0	0	0.725	0	-0.475	0.725	SML	0.45	0.4	-0.85	0.60208	SML
65	5	male	1	0	0	0	0.225	0	0.025	0.225	EVN	0.1	0	-0.1	0.1	EVN
68	25	female	1	1	0	0	0.125	0.1	0.025	0.160078	EVN	0.05	0.1	-0.15	0.111803	EVN
61	34	female	0	0	0	0	0	0.25	0.25	0.25	LAR	0	0.25	0.25	0.25	LAR
57	22	male	1	1	0	0	0	0.125	0.125	0.125	EVN	0.1	0	-0.1	0.1	EVN
69	11	female	0	0	0	0	0	0	0	0	LDA	0	0	0	0	LDA
69	27	male	1	1	0	0	0	0.125	0.125	0.125	EVN	0	0	0	0	LDA
67	37	male	1	1	0	0	0.25	0	0.25	0.25	LAR	0.25	0.125	0.375	0.279508	LAR
77	14	female	1	1	0	0	0.1	0	-0.1	0.1	EVN	0	0	0	0	LDA
72	21	female	1	1	1	1	0.1	0.8	-0.9	0.806226	SML	0.15	0.5	-0.65	0.522015	SML
77	21	male	0	0	0	0	0.65	0.25	0.1	0.696419	EVN	1.05	0	-0.55	1.05	SML
55	8	female	1	1	0	0	0.55	1.25	-0.3	1.36565	SML	0.775	0.375	0.35	0.860959	LAR
70	23	female	1	1	0	0	0.575	1.125	-0.7	1.26343	SML	0.275	1	-1.025	1.03712	SML
81	20	female	0	0	0	0	0.5	0.833333	1.33333	0.971825	LAR	0.65	0.125	-0.025	0.66191	EVN
66	5	female	1	1	0	0	0	0.125	0.125	0.125	EVN	0	0.25	0.25	0.25	LAR
92	16	female	1	1	0	0	1.7	0.5	0.3	1.772	LAR	1.7	0.25	0.05	1.71828	EVN
65	20	female	1	1	1	1	0.275	1.25	-0.775	1.27989	SML	0.45	1.25	-0.7	1.32853	SML
48	24	male	1	1	0	0	0.15	0	-0.15	0.15	EVN	0.05	0	-0.05	0.05	LDA
80	20	female	0	0	0	0	0	0	0	0	LDA	0	0	0	0	LDA
72	20	male	0	0	0	0	0	0	0	0	LDA	0	0	0	0	LDA
89	24	female	0	0	0	0	0.25	1.25	-0.5	1.27475	SML	0.25	1.25	-0.5	1.27475	SML
68	33	female	0	0	0	0	0.8	0.166667	0.866667	0.817177	LAR	0.5	0.583333	1.08333	0.768295	LAR
56	6	female	1	1	0	0	0.4	0.25	-0.15	0.471699	EVN	0.2	0.666667	0.466667	0.69602	LAR
73	19	male	0	0	0	0	0	0	0	0	LDA	0	0	0	0	LDA
80	15	female	1	1	0	0	0	0	0	0	LDA	0.25	0	0.25	0.25	LAR
65	3	female	1	1	0	0	0.25	0	0.25	0.25	LAR	0.25	0	0.25	0.25	LAR
52	21	female	1	1	0	0	0.05	0	-0.05	0.05	LDA	0.375	0.125	0.5	0.395285	LAR
57	1	female	0	1	0	0	0.4	0.125	0.225	0.419076	LAR	0	0	0	0	LDA
67	23	female	1	1	1	1	0.05	0	-0.05	0.05	LDA	0.1	0	-0.1	0.1	EVN
64	11	female	1	0	0	0	0.475	0	0.275	0.475	LAR	0	0.125	0.125	0.125	EVN
73	5	female	1	1	0	0	0.25	0.541667	0.791667	0.596576	LAR	0.25	0.125	0.375	0.279508	LAR
65	6	female	0	0	0	0	0	0	0	0	LDA	0	0	0	0	LDA
64	28	female	1	0	0	0	0.4	0	0.1	0.4	EVN	0.7	1	-1.2	1.22066	SML
50	19	female	1	1	0	0	0	0	0	0	LDA	0	0	0	0	LDA
41	19	female	0	0	0	0	1.05	0	-0.05	1.05	EVN	1.05	0.125	0.075	1.05741	EVN
66	35	female	1	1	0	0	1.55	0.583333	0.0333333	1.65613	EVN	1.15	0.375	0.725	1.2096	LAR
55	23	female	1	1	1	1	0.275	0.5	-0.525	0.570636	SML	0.3	0.75	-0.55	0.807775	SML
70	18	female	0	0	0	0	0.1	0.2	-0.3	0.223607	SML	0	0	0	0	LDA
66	10	female	0	0	0	0	0.175	0	0.075	0.175	EVN	0.25	0	0.25	0.25	LAR
58	7	female	1	1	0	0	0.05	1	-1.05	1.00125	SML	0.3	1.25	-1.05	1.2855	SML
64	0	female	1	1	0	0	0.225	0	0.025	0.225	EVN	0.125	0	0.125	0.125	EVN
66	16	female	0	0	0	0	0.05	0	-0.05	0.05	LDA	0.2	0.2	-0.4	0.282843	SML
69	5	female	1	1	0	0	0	0	0	0	LDA	0	0	0	0	LDA
74	21	male	0	0	0	0	0	0.125	0.125	0.125	EVN	1	0.125	-0.875	1.00778	SML
56	22	female	0	0	0	0	0	0	0	0	LDA	0	0	0	0	LDA
74	17	female	1	1	0	0	0.85	0.25	-0.1	0.886002	EVN	1	0.125	0.125	1.00778	EVN
63	18	female	1	1	0	0	0	0	0	0	LDA	0.1	0	-0.1	0.1	EVN
79	11	male	1	1	0	0	0	0	0	0	LDA	0	0	0	0	LDA
68	16	female	0	0	0	0	0	0	0	0	LDA	0	0	0	0	LDA
83	26	female	0	0	0	0	1.5	0.25	-0.25	1.52069	SML	1.25	0.25	-0.5	1.27475	SML
72	17	male	1	1	0	0	0.85	0.25	-0.1	0.886002	EVN	1.85	0.25	-1.1	1.86682	SML
66	21	female	1	1	0	0	0.3	1	-0.8	1.04403	SML	0.3	1.25	-0.55	1.2855	SML
69	17	female	1	1	1	1	0.125	0	0.125	0.125	EVN	0.125	0.125	0.25	0.176777	LAR
77	34	female	1	1	0	0	0	0	0	0	LDA	0	0	0	0	LDA
64	3	female	1	1	0	0	0	0	0	0	LDA	1.25	0.125	-0.625	1.25623	SML
63	1	male	0	0	0	0	2.15	1.5	-1.15	2.62155	SML	1.55	1.5	-0.55	2.15697	SML
61	2	male	1	1	0	0	0	0	0	0	LDA	0	0	0	0	LDA
67	24	female	1	1	1	1	0.225	1	-0.975	1.025	SML	0.325	1	-1.075	1.05149	SML
85	16	female	1	1	0	0	0	0	0	0	LDA	0.05	0	-0.05	0.05	LDA
79	16	female	0	0	0	0	0	0.125	0.125	0.125	EVN	0	0.125	0.125	0.125	EVN
64	34	female	0	0	1	1	0.25	0	0.25	0.25	LAR	0.425	0.2	0.125	0.469707	EVN
71	18	female	0	0	0	0	0	0	0	0	LDA	0	0	0	0	LDA
60	25	female	1	1	0	0	0.225	0	0.025	0.225	EVN	0.525	0	-0.275	0.525	SML
68	15	female	1	1	0	0	0.5	0.225	0.525	0.548293	LAR	1.025	1.25	-0.525	1.61652	SML
58	12	female	1	1	1	1	0.7	0	-0.2	0.7	EVN	0.525	0	-0.275	0.525	SML
62	15	female	1	1	0	0	0.95	0.583333	0.133333	1.1148	EVN	0.95	0.55	-1	1.09772	SML
41	16	female	1	1	0	0	0	0	0	0	LDA	0.05	0	-0.05	0.05	LDA
53	15	female	1	1	0	0	0.1	0	-0.1	0.1	EVN	0	0	0	0	LDA
67	15	male	1	0	0	0	0	0	0	0	LDA	0	0	0	0	LDA
77	24	female	0	0	0	0	0	0	0	0	LDA	0	0	0	0	LDA
56	17	female	1	1	0	0	1.3	0	0.2	1.3	EVN	1.15	0.325	0.275	1.19504	LAR
78	16	male	0	0	0	0	0	0	0	0	LDA	0.5	0	0.5	0.5	LAR
70	34	female	1	1	1	1	0	0	0	0	LDA	0	0.125	0.125	0.125	EVN
57	15	female	1	1	1	0	0	0.125	0.125	0.125	EVN	0	1	-1	1	SML
69	14	female	1	1	0	0	0	0	0	0	LDA	0	0	0	0	LDA
56	14	female	1	1	0	0	0.375	0	0.375	0.375	LAR	0.25	0	0.25	0.25	LAR
42	13	female	1	1	0	0	0	0	0	0	LDA	0.3	0	0.2	0.3	EVN
51	13	female	1	1	0	0	0.15	1	-1.15	1.01119	SML	0.05	1	-1.05	1.00125	SML
52	14	female	1	1	0	0	0.525	0	0.225	0.525	LAR	0.475	0.291667	0.566667	0.5574	LAR
66	8	female	1	1	1	1	0	0	0	0	LDA	0	0.125	0.125	0.125	EVN
42	14	female	1	1	1	1	0	0	0	0	LDA	0	0	0	0	LDA
75	34	female	0	0	0	0	0.175	0.125	0.2	0.215058	EVN	0.125	0.125	0.25	0.176777	LAR
66	23	female	1	1	0	0	0.05	0.125	0.075	0.134629	EVN	0.05	0.125	0.075	0.134629	EVN
80	39	female	0	0	0	0	0	0	0	0	LDA	0	0	0	0	LDA
78	14	female	1	1	0	0	0	0	0	0	LDA	0	0	0	0	LDA
75	13	female	0	0	0	0	0	0	0	0	LDA	0	0	0	0	LDA
58	15	female	0	0	0	0	0.125	0.125	0.25	0.176777	LAR	0	0.125	0.125	0.125	EVN
53	15	female	0	0	0	0	0	0	0	0	LDA	0	0	0	0	LDA
63	15	female	0	0	0	0	0.775	0.541667	0.516667	0.94553	LAR	0.85	0.45	-0.3	0.961769	SML
72	17	female	0	0	0	0	0	0	0	0	LDA	0	0	0	0	LDA
51	3	female	1	1	0	0	0	0	0	0	LDA	0.475	0	0.275	0.475	LAR
67	13	female	1	0	0	0	1.05	0.125	-0.425	1.05741	SML	0	0.125	0.125	0.125	EVN
66	12	female	1	1	0	0	1.25	1	-1.75	1.60078	SML	1	1.25	-1.75	1.60078	SML
67	14	female	0	0	0	0	0	1	-1	1	SML	0	1	-1	1	SML
60	12	female	1	1	0	0	0	0	0	0	LDA	0	0	0	0	LDA
79	12	female	0	0	0	0	0	0	0	0	LDA	0	0.125	0.125	0.125	EVN
67	12	male	1	1	0	0	0.1	0	-0.1	0.1	EVN	0.65	0	-0.65	0.65	SML
51	12	male	1	0	1	0	0.3	0.125	0.325	0.325	LAR	0.3	0.25	0.45	0.390512	LAR
68	32	female	0	0	0	0	0.775	0.625	0.1	0.995615	EVN	0.4	0.125	0.225	0.419076	LAR
82	7	female	0	0	0	0	0.75	0	-0.25	0.75	SML	0.4	0	-0.4	0.4	SML
45	12	female	1	1	0	0	0.25	0	0.25	0.25	LAR	0.25	0	0.25	0.25	LAR
51	12	female	1	1	1	1	0.225	0.25	0.275	0.336341	LAR	0.15	0.25	0.1	0.291548	EVN
67	20	male	1	1	0	0	0	0	0	0	LDA	0.05	0	-0.05	0.05	LDA
69	12	male	1	1	0	0	0	0	0	0	LDA	0.1	0	-0.1	0.1	EVN
61	13	female	1	1	0	0	0.3	0.291667	0.491667	0.418413	LAR	0.25	0.416667	0.666667	0.485913	LAR
54	10	female	1	1	0	0	0	0	0	0	LDA	0	0	0	0	LDA
62	12	female	1	1	0	0	0	0	0	0	LDA	0.1	0	-0.1	0.1	EVN
70	12	male	1	1	0	0	0	0	0	0	LDA	0	0.125	0.125	0.125	EVN
79	11	male	0	0	0	0	0.375	0.25	0.625	0.450694	LAR	1.35	0.25	1.4	1.37295	LAR
83	16	female	1	1	0	0	0	0	0	0	LDA	0	0	0	0	LDA
50	18	female	1	1	1	1	0.5	0.4	-0.9	0.640312	SML	0	0	0	0	LDA
60	11	female	0	0	0	0	0	0	0	0	LDA	0	0.125	0.125	0.125	EVN
41	11	male	0	0	0	0	0	0.125	0.125	0.125	EVN	0	0.125	0.125	0.125	EVN
60	11	female	1	1	0	0	0.05	0.125	0.075	0.134629	EVN	0.05	0	-0.05	0.05	LDA
78	13	male	0	0	1	1	0.375	0.25	0.625	0.450694	LAR	0.375	0.25	0.625	0.450694	LAR
67	11	female	1	1	1	1	0	0	0	0	LDA	0	0	0	0	LDA
76	13	male	1	1	0	0	0.325	0.125	0.05	0.34821	EVN	0.45	0.3	-0.25	0.540833	SML
82	24	female	1	1	0	0	0.2	0.125	-0.075	0.23585	EVN	0.2	0.125	-0.075	0.23585	EVN
65	11	male	1	1	1	1	0	0	0	0	LDA	0	0	0	0	LDA
52	10	female	1	1	1	0	0.575	0.35	-0.175	0.673146	EVN	0.1	0.2	-0.3	0.223607	SML
64	11	male	1	1	0	0	0.45	0	0.05	0.45	EVN	0.4	0	-0.4	0.4	SML
47	10	female	1	1	0	0	0.35	0	0.15	0.35	EVN	0.05	0	-0.05	0.05	LDA
64	14	female	1	1	0	0	0	0	0	0	LDA	0	0	0	0	LDA
69	13	female	1	1	1	1	0.15	0.25	0.1	0.291548	EVN	0.575	0	0.175	0.575	EVN
74	11	female	1	1	0	0	0.25	0.25	0.5	0.353553	LAR	0.125	0	0.125	0.125	EVN
73	13	female	1	1	1	1	0.15	0.125	-0.025	0.195256	EVN	0.75	0.125	-0.125	0.760345	EVN
72	16	female	1	1	0	0	0	0	0	0	LDA	0	0	0	0	LDA
52	23	female	1	1	0	0	0.125	0	0.125	0.125	EVN	0.125	0	0.125	0.125	EVN
72	10	female	0	0	1	1	0	0	0	0	LDA	0	0	0	0	LDA
68	26	female	0	0	0	0	0.25	0.166667	0.416667	0.300463	LAR	0.125	0.166667	0.291667	0.208333	LAR
78	36	female	1	1	0	0	0.725	0.25	0.775	0.766893	LAR	0.6	1	-0.6	1.16619	SML
78	12	male	1	1	1	1	0	0	0	0	LDA	0	0	0	0	LDA
65	14	male	0	0	0	0	0	0	0	0	LDA	0.15	0.333333	0.183333	0.365529	EVN
52	46	male	1	1	0	0	0	0.25	0.25	0.25	LAR	0	0.125	0.125	0.125	EVN
52	11	female	1	1	1	0	0.1	0	-0.1	0.1	EVN	0.575	0.583333	0.758333	0.819087	LAR
53	13	male	1	1	0	0	0	0	0	0	LDA	0	0	0	0	LDA
80	16	female	1	1	0	0	0	0	0	0	LDA	0	0.125	0.125	0.125	EVN
51	15	female	1	1	1	1	0.425	1.46667	-0.308333	1.527	SML	0.5	0.833333	0.833333	0.971825	LAR
71	9	female	0	0	0	0	0.25	0.125	0.375	0.279508	LAR	0	0.25	0.25	0.25	LAR
60	11	female	0	0	0	0	0	0	0	0	LDA	0.15	0	-0.15	0.15	EVN
63	10	male	1	1	0	0	0	0	0	0	LDA	0	0	0	0	LDA
66	13	female	1	1	0	0	0.3	0	0.2	0.3	EVN	0.25	0	0.25	0.25	LAR
67	11	female	1	1	0	0	0	0	0	0	LDA	0	0	0	0	LDA
64	7	female	0	0	1	1	0	0	0	0	LDA	0	0	0	0	LDA
72	13	female	1	1	0	0	0	0	0	0	LDA	0	0	0	0	LDA
78	12	female	1	1	0	0	0.3	0.125	0.325	0.325	LAR	0	0	0	0	LDA
65	9	male	1	1	0	0	0	0	0	0	LDA	0	0	0	0	LDA
79	9	male	0	0	0	0	0	0	0	0	LDA	0	0	0	0	LDA
67	12	female	1	1	1	1	0.125	0.166667	0.291667	0.208333	LAR	0	0	0	0	LDA
75	9	female	1	1	0	0	0	0.125	0.125	0.125	EVN	0	0	0	0	LDA
56	16	female	1	1	1	1	0.5	0.25	0.75	0.559017	LAR	0.55	1.25	-0.3	1.36565	SML
69	11	female	0	0	0	0	1.35	0.625	0.275	1.48766	LAR	1	0.25	0.25	1.03078	LAR
74	13	female	0	0	1	1	0.6	0.541667	0.441667	0.808333	LAR	0.625	0.416667	0.541667	0.751157	LAR
62	20	female	1	1	0	0	0.25	0	0.25	0.25	LAR	0.5	0	0.5	0.5	LAR
44	34	female	0	0	0	0	0.125	0.125	0.25	0.176777	LAR	0	0.125	0.125	0.125	EVN
45	10	female	1	1	1	1	0	0	0	0	LDA	0	0	0	0	LDA
65	12	female	1	1	0	0	0	0.1	-0.1	0.1	EVN	0.15	0.5	-0.65	0.522015	SML
56	10	male	1	1	0	0	0.125	0	0.125	0.125	EVN	0	0	0	0	LDA
77	9	male	1	1	0	0	0.85	0	-0.85	0.85	SML	0.825	0	-0.075	0.825	EVN
61	9	female	1	1	1	1	0.275	0	-0.025	0.275	EVN	0.05	0	-0.05	0.05	LDA
65	10	female	1	1	1	1	1.125	0.125	-0.75	1.13192	SML	1.25	0.125	-0.625	1.25623	SML
39	8	female	1	1	1	1	0.475	0	0.275	0.475	LAR	0.275	0	-0.025	0.275	EVN
77	0	male	0	0	0	0	0.15	0	-0.15	0.15	EVN	1.9	0.5	0.6	1.96469	LAR
66	30	female	1	1	0	0	0.45	0	0.05	0.45	EVN	0.25	0.125	0.375	0.279508	LAR
51	7	female	0	0	0	0	0	0	0	0	LDA	0	0	0	0	LDA
71	8	female	1	0	0	0	0	0	0	0	LDA	0	0	0	0	LDA
64	8	female	0	0	0	0	0	0	0	0	LDA	0	0	0	0	LDA
83	6	female	1	1	0	0	0	0	0	0	LDA	0.35	0	-0.35	0.35	SML
64	9	female	0	0	1	1	0	0.125	0.125	0.125	EVN	0	0.25	0.25	0.25	LAR
84	8	female	1	1	0	0	1.75	0.5	0.25	1.82003	LAR	1.75	0.75	0.5	1.90394	LAR
61	0	female	1	1	0	0	0	0	0	0	LDA	0	0	0	0	LDA
72	10	female	1	1	1	1	0.25	0.541667	0.791667	0.596576	LAR	0.55	0.375	0.825	0.665676	LAR
56	7	female	1	1	0	0	1.1	0	-0.1	1.1	EVN	1.175	0	0.075	1.175	EVN
63	8	female	1	1	1	1	0	0	0	0	LDA	0	0	0	0	LDA
48	11	female	1	1	1	1	0.25	0	0.25	0.25	LAR	0.125	0	0.125	0.125	EVN
61	12	female	1	1	0	0	0.65	0.166667	-0.483333	0.671027	SML	0.2	1	-1.2	1.0198	SML
53	13	female	1	1	0	0	0.45	0	-0.45	0.45	SML	0.4	0	-0.4	0.4	SML
27	8	female	1	1	1	1	0.125	0	0.125	0.125	EVN	0	0	0	0	LDA
56	7	male	1	0	0	0	0	0	0	0	LDA	0	0	0	0	LDA
77	7	male	1	1	0	0	0	0.125	0.125	0.125	EVN	0	0	0	0	LDA
60	10	male	1	1	0	0	0.325	0.125	0.05	0.34821	EVN	0.275	0.125	0.1	0.302076	EVN
66	7	male	1	1	0	0	0	0	0	0	LDA	0	0	0	0	LDA
63	6	female	1	1	0	0	0	0.125	0.125	0.125	EVN	0	0	0	0	LDA
51	8	female	1	1	1	1	0	0	0	0	LDA	0	0	0	0	LDA
58	8	male	1	1	0	0	0.05	0	-0.05	0.05	LDA	0	0	0	0	LDA
59	7	male	1	1	0	0	0.1	0.625	-0.475	0.632949	SML	0.4	0.2	-0.6	0.447214	SML
60	6	female	1	1	0	0	0.275	0.125	0.1	0.302076	EVN	0	0	0	0	LDA
66	6	female	1	1	0	0	0	0	0	0	LDA	0	0	0	0	LDA
91	39	female	0	0	0	0	1.55	0.25	-0.3	1.57003	SML	1.7	0.25	-0.45	1.71828	SML
82	9	female	1	1	0	0	0	0	0	0	LDA	0.925	0	-0.675	0.925	SML
74	8	female	1	1	0	0	0	0	0	0	LDA	0	0	0	0	LDA
77	30	female	1	0	0	0	1.025	1.70833	-1.06667	1.99224	SML	1.3	1.70833	-0.591667	2.14672	SML
56	10	female	1	1	1	1	0	0	0	0	LDA	0	0	0	0	LDA
58	18	female	0	0	1	1	0	0	0	0	LDA	0	0	0	0	LDA
38	7	female	0	0	1	1	0	0	0	0	LDA	0	0	0	0	LDA
69	7	male	0	0	0	0	0.625	0	0.625	0.625	LAR	0.75	0	0.75	0.75	LAR
54	6	female	1	1	0	0	0.275	0.125	0.1	0.302076	EVN	0.225	0.125	0.15	0.257391	EVN
75	7	male	0	0	0	1	0.35	0.125	0.275	0.371652	LAR	0	0	0	0	LDA
85	6	male	0	0	0	0	0	0	0	0	LDA	0	0	0	0	LDA
71	6	female	0	0	0	0	0	0	0	0	LDA	0	0	0	0	LDA
58	6	female	1	1	0	0	0	0	0	0	LDA	0.15	0	-0.15	0.15	EVN
75	6	female	1	1	0	0	1.475	0.833333	0.608333	1.69413	LAR	2	0.833333	0.833333	2.16667	LAR
59	5	female	0	0	0	0	0.35	0.25	0.4	0.430116	LAR	0	0.25	0.25	0.25	LAR
32	7	male	0	0	1	1	0	0	0	0	LDA	0	0	0	0	LDA
58	6	male	1	1	1	1	0	0	0	0	LDA	0.125	0	0.125	0.125	EVN
63	29	male	0	0	1	1	0.5	0	0.5	0.5	LAR	0.375	0	0.375	0.375	LAR
71	8	female	1	1	0	0	0.35	0	0.15	0.35	EVN	0.25	0	0.25	0.25	LAR
52	6	female	1	1	1	1	0	0	0	0	LDA	0	0	0	0	LDA
53	5	female	0	0	0	0	0	0	0	0	LDA	0	0	0	0	LDA
48	6	male	1	1	0	0	0	0	0	0	LDA	0	0	0	0	LDA
47	7	female	0	0	1	1	0.175	0.125	0.2	0.215058	EVN	0.55	0	-0.05	0.55	EVN
55	6	male	1	1	1	1	0	0	0	0	LDA	0	0	0	0	LDA
62	7	male	1	1	0	0	0	0	0	0	LDA	0	0	0	0	LDA
84	9	female	0	0	0	0	2.025	0	-0.775	2.025	SML	1.775	0	-1.025	1.775	SML
74	7	female	1	1	0	0	0.6	0.291667	0.191667	0.667135	EVN	0.925	0.416667	0.741667	1.01451	LAR
41	5	female	1	1	0	0	0.175	0	0.075	0.175	EVN	0.1	0	-0.1	0.1	EVN
72	9	female	1	0	0	0	1.125	0.5	0.625	1.23111	LAR	1.25	0.25	0.5	1.27475	LAR
29	5	female	0	0	1	1	0.125	0	0.125	0.125	EVN	0.9	0.5	1.1	1.02956	LAR
89	15	female	0	0	0	0	0.6	0.666667	1.06667	0.896908	LAR	0.75	1.66667	0.416667	1.82764	LAR
75	14	female	0	0	0	0	0	0	0	0	LDA	0	0.25	0.25	0.25	LAR
65	6	female	1	1	0	0	0.25	0	0.25	0.25	LAR	0.125	0	0.125	0.125	EVN
58	14	male	1	1	0	0	0.05	0.25	0.2	0.254951	EVN	0.3	0.25	-0.05	0.390512	EVN
56	5	female	0	0	1	1	0	0	0	0	LDA	0	0	0	0	LDA
70	12	female	0	0	1	1	0.95	0.333333	0.383333	1.00678	LAR	0.95	0	0.55	0.95	LAR
68	5	male	1	1	0	0	0.25	0	0.25	0.25	LAR	0.125	0.125	0.25	0.176777	LAR
77	7	female	1	1	0	0	0	1	-1	1	SML	0	0	0	0	LDA
44	8	male	1	1	0	0	0	0	0	0	LDA	0.1	0	-0.1	0.1	EVN
55	7	female	1	1	0	0	0	0	0	0	LDA	0	0	0	0	LDA
55	2	female	1	1	0	0	0	0	0	0	LDA	0	0	0	0	LDA
81	5	female	0	0	1	1	1.8	0.5	1.2	1.86815	LAR	0	0.25	0.25	0.25	LAR
60	4	female	1	1	0	0	0	0	0	0	LDA	0	0	0	0	LDA
63	6	male	0	0	0	0	0.375	0	0.375	0.375	LAR	0.225	0	0.025	0.225	EVN
67	14	female	1	1	0	0	0.1	0.25	0.15	0.269258	EVN	0	0	0	0	LDA
64	8	female	0	0	0	0	0.7	0.625	-0.075	0.938416	EVN	0.4	1	-1.4	1.07703	SML
46	2	male	1	1	0	0	0	0	0	0	LDA	0	0	0	0	LDA
55	4	male	1	1	0	0	0.45	0.2	-0.15	0.492443	EVN	0.7	0.4	-0.1	0.806226	EVN
64	4	male	1	1	0	0	0	0	0	0	LDA	0	0	0	0	LDA
56	4	male	1	1	0	0	0.35	0	0.15	0.35	EVN	0.05	0	-0.05	0.05	LDA
68	41	female	0	0	0	0	0	0	0	0	LDA	0	0	0	0	LDA
77	7	male	1	1	0	0	0.35	0.25	0.4	0.430116	LAR	0.85	0	0.65	0.85	LAR
63	6	male	1	1	0	0	0	0	0	0	LDA	0	0	0	0	LDA
54	7	female	1	1	0	0	0	0.291667	0.291667	0.291667	LAR	0	0.291667	0.291667	0.291667	LAR
61	4	male	0	0	0	0	0	0	0	0	LDA	0	0	0	0	LDA
65	3	female	1	1	0	0	0	0	0	0	LDA	0	0	0	0	LDA
42	5	female	1	1	0	0	0.125	0.25	0.375	0.279508	LAR	0	0	0	0	LDA
54	20	female	1	0	1	1	0	0	0	0	LDA	0.125	0.125	0.25	0.176777	LAR
48	6	male	0	0	1	1	0.05	0	-0.05	0.05	LDA	0	0	0	0	LDA
64	4	male	0	0	0	0	0	0	0	0	LDA	0	0	0	0	LDA
65	7	male	1	1	0	0	0	0	0	0	LDA	0	0	0	0	LDA
68	13	male	0	0	0	0	0.125	0.125	0.25	0.176777	LAR	0	0	0	0	LDA
49	3	female	1	1	0	0	0.125	0	0.125	0.125	EVN	0	0	0	0	LDA
78	44	male	0	0	0	0	0.25	0.125	0.375	0.279508	LAR	0	0.125	0.125	0.125	EVN
45	3	female	0	0	0	0	0	0	0	0	LDA	0.175	0	0.075	0.175	EVN
74	3	male	0	0	0	0	0.05	0	-0.05	0.05	LDA	0	0	0	0	LDA
63	11	female	0	0	0	0	0	0	0	0	LDA	0.05	0	-0.05	0.05	LDA
69	4	female	1	1	0	0	0	0	0	0	LDA	0.175	1.125	-0.8	1.13853	SML
83	3	female	1	0	1	1	0.15	0	-0.15	0.15	EVN	0.125	0	0.125	0.125	EVN
63	16	female	0	0	1	1	0.25	0.333333	0.583333	0.416667	LAR	0	0	0	0	LDA
78	2	female	0	0	0	0	1	0.25	0.75	1.03078	LAR	0.85	0.25	0.4	0.886002	LAR
63	12	female	1	1	0	0	0	0	0	0	LDA	0	0	0	0	LDA
56	4	female	1	1	0	0	0.3	0.125	0.325	0.325	LAR	0.25	0.2	0.05	0.320156	EVN
46	3	male	1	1	0	0	0.125	0	0.125	0.125	EVN	1.3	0.625	-0.675	1.44244	SML
65	2	male	1	1	0	0	0	0	0	0	LDA	0	0	0	0	LDA
86	2	male	1	0	0	0	0.4	0	-0.4	0.4	SML	0.4	0.125	-0.275	0.419076	SML
50	2	female	1	1	0	0	0.3	1	-0.8	1.04403	SML	0.35	0	-0.35	0.35	SML
79	2	female	1	1	1	1	0.225	0	0.025	0.225	EVN	0.7	0.25	0.05	0.743303	EVN
49	3	female	1	1	0	0	0.125	1	-0.875	1.00778	SML	0	0	0	0	LDA
52	2	male	1	1	0	0	0	0	0	0	LDA	0	0	0	0	LDA
71	5	female	1	1	0	0	0.1	1	-1.1	1.00499	SML	1.5	1.75	-0.75	2.30489	SML
67	2	female	0	0	0	0	0.05	0	-0.05	0.05	LDA	0	0	0	0	LDA
73	23	female	0	0	0	0	1.75	0.5	0.25	1.82003	LAR	1.25	0.75	0	1.45774	EVN
62	2	male	1	1	0	0	0	0	0	0	LDA	0	0	0	0	LDA
76	35	female	0	0	0	0	0	0	0	0	LDA	0.475	0	0.275	0.475	LAR
36	3	female	1	1	0	0	0.175	0	0.075	0.175	EVN	0.125	0.125	0.25	0.176777	LAR
80	8	male	1	0	0	0	0	0	0	0	LDA	0	0	0	0	LDA
52	6	female	1	1	0	0	0.125	0.416667	0.541667	0.435013	LAR	0.55	0.416667	0.866667	0.690008	LAR
59	1	female	1	1	0	0	0	0	0	0	LDA	0.1	0	-0.1	0.1	EVN
88	16	female	0	0	0	0	0.275	0.125	0.1	0.302076	EVN	0.275	0.125	0.1	0.302076	EVN
88	15	female	0	0	0	0	0.5	0.125	0.125	0.515388	EVN	0.35	0	0.15	0.35	EVN
44	3	female	1	1	0	0	0	0.525	-0.275	0.525	SML	0	0.3	-0.3	0.3	SML
54	12	female	0	0	0	0	0.35	0	0.15	0.35	EVN	0.35	0	0.15	0.35	EVN
49	2	female	0	0	0	0	0	0	0	0	LDA	0.975	0.5	0.775	1.09573	LAR
55	5	female	1	1	1	1	0.125	0.225	0.15	0.257391	EVN	0	0.125	0.125	0.125	EVN
73	2	female	1	1	0	0	0	0	0	0	LDA	0	0	0	0	LDA
86	1	female	0	0	0	0	0.05	0.125	0.075	0.134629	EVN	0.6	0.125	0.525	0.612883	LAR
88	10	female	0	0	0	0	0.55	0.416667	0.366667	0.690008	LAR	0.45	0.416667	0.466667	0.613279	LAR
64	3	female	1	1	0	0	0.25	0	0.25	0.25	LAR	0.125	0	0.125	0.125	EVN
52	2	male	1	1	1	1	0.3	0.125	0.325	0.325	LAR	0.375	0.25	0.625	0.450694	LAR
74	13	female	0	0	1	1	0.175	0.725	0.6	0.745822	LAR	0.225	0.125	0.15	0.257391	EVN
73	4	female	0	0	0	0	0.375	0	0.375	0.375	LAR	0.125	0	0.125	0.125	EVN
80	1	female	0	0	0	0	0.05	0.416667	0.366667	0.419656	LAR	0	0.416667	0.416667	0.416667	LAR
87	2	female	1	1	0	0	0.875	0.25	0.625	0.910014	LAR	1.25	0.833333	0.0833333	1.50231	EVN
56	2	male	1	1	0	0	0	0	0	0	LDA	0	0	0	0	LDA
55	3	female	1	1	1	1	0	0	0	0	LDA	0	0	0	0	LDA
53	1	female	1	1	1	1	0	0	0	0	LDA	0.175	0.291667	0.366667	0.340139	LAR
52	1	female	1	1	0	0	0	0	0	0	LDA	0	0	0	0	LDA
74	1	female	1	1	0	0	0.375	0.1	-0.225	0.388104	SML	0.225	0	0.025	0.225	EVN
53	14	female	0	0	0	0	0	0.125	0.125	0.125	EVN	0.25	0	0.25	0.25	LAR
76	1	female	0	0	0	0	0.3	0	-0.3	0.3	SML	0.3	0	-0.3	0.3	SML
60	4	female	0	0	0	0	0.475	0	-0.225	0.475	SML	0.45	0	0.05	0.45	EVN
71	41	male	0	0	0	0	1.325	0.375	0.3	1.37704	LAR	0.525	0	0.225	0.525	LAR
86	18	female	0	0	0	0	0	0	0	0	LDA	0	0	0	0	LDA
58	1	female	1	1	0	0	0.1	0	-0.1	0.1	EVN	0.05	0.25	0.2	0.254951	EVN
61	1	female	1	1	0	0	0.625	0.125	0.75	0.637377	LAR	0.375	0	0.375	0.375	LAR
73	3	female	0	0	0	0	0.175	0.25	0.325	0.305164	LAR	0.175	0.25	0.325	0.305164	LAR
66	0	male	0	0	1	1	0	0	0	0	LDA	0	0	0	0	LDA
73	35	female	0	0	0	0	0.525	0.35	-0.125	0.630971	EVN	1.1	0.875	-0.725	1.40557	SML
78	1	male	0	0	0	0	0.125	0.25	0.375	0.279508	LAR	0	0	0	0	LDA
63	4	female	0	0	1	1	1.45	0.625	0.675	1.57896	LAR	1.625	1.75	-0.625	2.38812	SML
44	1	male	0	0	0	0	0.1	0	-0.1	0.1	EVN	0.15	0	-0.15	0.15	EVN
58	1	female	0	0	0	0	0.2	0.375	0.175	0.425	EVN	0.4	0	0.1	0.4	EVN
74	6	female	0	0	0	0	0.25	0.25	0.5	0.353553	LAR	0.25	0.25	0.5	0.353553	LAR
91	4	male	1	1	0	0	0	0	0	0	LDA	0.2	0	-0.2	0.2	SML
81	7	female	0	0	0	0	0.3	0.125	0.325	0.325	LAR	0.6	0.291667	0.691667	0.667135	LAR
92	70	male	0	0	0	0	0	0	0	0	LDA	0	0	0	0	LDA
72	12	female	1	1	0	0	0	0	0	0	LDA	0	0	0	0	LDA
76	11	male	0	0	0	0	0.5	0	0.5	0.5	LAR	0.5	0.125	0.625	0.515388	LAR
84	0	female	1	1	0	0	0.1	0	-0.1	0.1	EVN	0.15	0	-0.15	0.15	EVN
55	16	male	1	1	0	0	0	0	0	0	LDA	0	0	0	0	LDA
85	2	female	1	0	0	0	0	0	0	0	LDA	0	0	0	0	LDA
73	0	female	1	0	0	0	0.175	0	0.075	0.175	EVN	0.3	0	-0.3	0.3	SML
68	1	female	1	1	0	0	1.025	0.541667	1.26667	1.15932	LAR	0.625	0.25	0.375	0.673146	LAR
63	0	female	1	1	0	1	0.375	0.708333	1.08333	0.801474	LAR	0	0.291667	0.291667	0.291667	LAR
78	12	female	0	0	0	0	0	0	0	0	LDA	0	0	0	0	LDA
74	5	female	0	0	0	0	0	0	0	0	LDA	0	0	0	0	LDA
80	43	female	1	1	0	0	0.125	0	0.125	0.125	EVN	0	0	0	0	LDA
58	14	female	1	1	1	1	0	0	0	0	LDA	0	0	0	0	LDA
54	22	female	0	0	0	0	0.475	0.333333	0.108333	0.58029	EVN	0.2	0.366667	-0.233333	0.417665	SML
79	10	male	0	0	1	1	1	0.5	0.5	1.11803	LAR	0.25	0.225	0.275	0.336341	LAR
82	47	female	0	0	0	0	0	0	0	0	LDA	0	0	0	0	LDA
65	35	female	0	0	0	0	0.25	0	0.25	0.25	LAR	0	0	0	0	LDA
74	39	female	0	0	1	1	0	0	0	0	LDA	0.25	0.291667	0.541667	0.384148	LAR
73	51	female	1	1	0	0	0	0.291667	0.291667	0.291667	LAR	0	0.166667	0.166667	0.166667	EVN
72	17	female	1	1	0	0	0.525	0	-0.275	0.525	SML	0	0	0	0	LDA
74	55	female	0	0	0	0	0.125	0.125	0.25	0.176777	LAR	0	0	0	0	LDA
83	38	female	1	1	0	0	0.5	0.125	0.625	0.515388	LAR	0.5	0	0.5	0.5	LAR
75	35	female	1	1	0	0	0.125	0	0.125	0.125	EVN	0.15	0	-0.15	0.15	EVN
81	40	female	0	0	0	0	0	0	0	0	LDA	0	0	0	0	LDA
73	37	female	1	1	0	0	0.525	0	-0.275	0.525	SML	0.55	0	-0.05	0.55	EVN
62	11	female	1	1	0	0	0	0.35	0.15	0.35	EVN	0	0.25	0.25	0.25	LAR
60	6	female	0	1	0	0	0	0	0	0	LDA	0.175	0.125	0.2	0.215058	EVN
72	40	female	0	0	0	0	0	0	0	0	LDA	0	0	0	0	LDA
80	6	female	1	1	0	0	0	0.125	0.125	0.125	EVN	0	0	0	0	LDA
74	45	female	1	1	0	0	0	0	0	0	LDA	0.125	0	0.125	0.125	EVN
73	14	female	1	1	0	0	0	0	0	0	LDA	0.25	0	0.25	0.25	LAR
74	47	male	0	0	0	0	0	0	0	0	LDA	0	0.125	0.125	0.125	EVN
70	33	female	0	0	0	0	0.25	0.125	0.375	0.279508	LAR	0.125	0.125	0.25	0.176777	LAR
73	33	female	0	0	0	0	0.1	0	-0.1	0.1	EVN	0	0.8	-0.8	0.8	SML
72	18	female	0	0	0	0	0	0	0	0	LDA	0	0	0	0	LDA
71	33	female	1	1	0	0	0.125	0	0.125	0.125	EVN	0	0	0	0	LDA
78	39	female	1	1	0	0	0.05	0	-0.05	0.05	LDA	0.15	0	-0.15	0.15	EVN
67	20	female	1	1	0	0	0.25	0	0.25	0.25	LAR	0.25	0	0.25	0.25	LAR
45	0	female	0	1	0	0	0.925	0.641667	0.766667	1.12577	LAR	0.45	0.2	-0.15	0.492443	EVN
58	6	female	0	0	0	0	0	0.1	-0.1	0.1	EVN	0	0.1	-0.1	0.1	EVN
77	35	female	0	0	1	1	0.1	0	-0.1	0.1	EVN	0.1	0	-0.1	0.1	EVN
44	32	female	0	0	0	0	0.25	0.125	0.375	0.279508	LAR	0.25	0	0.25	0.25	LAR
76	4	female	1	1	0	0	0	0	0	0	LDA	0	0	0	0	LDA
66	15	female	0	0	0	0	0	0	0	0	LDA	0	0	0	0	LDA
72	9	female	0	0	0	0	0.1	0	-0.1	0.1	EVN	0	0	0	0	LDA
66	7	female	0	0	0	0	0	0	0	0	LDA	0	0	0	0	LDA
47	32	male	0	0	0	0	0.125	0.125	0.25	0.176777	LAR	0.125	0	0.125	0.125	EVN
84	17	female	0	0	0	0	0.25	0	0.25	0.25	LAR	0.05	0.291667	0.241667	0.295921	LAR
79	2	female	1	1	0	0	0	0	0	0	LDA	0	0	0	0	LDA
62	6	female	0	0	0	0	0	0	0	0	LDA	0	0	0	0	LDA
72	13	female	0	0	0	0	0.25	0	0.25	0.25	LAR	0.25	0	-0.25	0.25	SML
69	9	male	1	1	0	0	0	0	0	0	LDA	0	0	0	0	LDA
77	24	female	0	1	0	0	0.1	0	-0.1	0.1	EVN	0.35	0	-0.35	0.35	SML
72	43	female	1	1	0	0	0.25	0	-0.25	0.25	SML	0	0	0	0	LDA
73	37	female	0	0	0	0	0	0	0	0	LDA	0	0	0	0	LDA
70	39	female	1	1	0	0	0	0	0	0	LDA	0	0	0	0	LDA
63	15	female	0	0	0	0	0	0	0	0	LDA	0.125	0	0.125	0.125	EVN
71	37	female	1	1	0	0	0.35	0	0.15	0.35	EVN	0	0	0	0	LDA
81	8	female	1	1	1	1	0	0	0	0	LDA	0	0	0	0	LDA
67	3	female	1	1	0	1	0	0	0	0	LDA	0	0	0	0	LDA
69	19	female	0	0	0	0	0.3	0	0.2	0.3	EVN	0	0	0	0	LDA
75	4	female	1	1	0	1	0.6	0	-0.1	0.6	EVN	0.1	0	-0.1	0.1	EVN
81	2	female	0	0	0	0	0	0	0	0	LDA	0	0	0	0	LDA
61	3	male	1	1	0	0	0.1	0	-0.1	0.1	EVN	0	0	0	0	LDA
77	15	male	0	0	0	0	0	0	0	0	LDA	0	0	0	0	LDA
64	36	female	1	1	1	1	0	0.25	0.25	0.25	LAR	0	0.25	0.25	0.25	LAR
80	3	female	0	0	0	0	0	0	0	0	LDA	0.125	0	0.125	0.125	EVN
54	13	female	1	1	0	0	0.45	0	0.05	0.45	EVN	0.8	0.25	0.45	0.838153	LAR
47	45	female	0	0	0	0	0	0	0	0	LDA	0.05	0	-0.05	0.05	LDA
79	32	female	1	1	0	0	0.65	0	-0.15	0.65	EVN	0	0	0	0	LDA
74	19	female	1	1	0	0	0.3	0	-0.3	0.3	SML	0	0	0	0	LDA
83	32	female	1	1	0	0	0	0.25	0.25	0.25	LAR	0	0	0	0	LDA
71	43	female	1	1	0	0	0	0.333333	0.333333	0.333333	LAR	0	0.333333	0.333333	0.333333	LAR
72	37	female	0	0	0	0	0	0.291667	0.291667	0.291667	LAR	0	0.125	0.125	0.125	EVN
69	41	female	1	1	0	0	0.2	0	-0.2	0.2	SML	0.25	0	0.25	0.25	LAR
62	9	female	0	0	1	1	0	0	0	0	LDA	0.1	0	-0.1	0.1	EVN
75	31	female	1	1	0	0	0.25	0	0.25	0.25	LAR	0.2	0	-0.2	0.2	SML
80	19	male	0	0	0	0	0	0	0	0	LDA	0.5	0	0.5	0.5	LAR
87	41	female	0	0	0	0	0	0.125	0.125	0.125	EVN	0	0	0	0	LDA
79	2	female	1	1	0	0	0.35	0	0.15	0.35	EVN	0.45	0	0.05	0.45	EVN
68	3	female	1	1	0	0	0.125	0	0.125	0.125	EVN	0	0	0	0	LDA
58	1	female	1	1	0	0	0.1	0.2	-0.3	0.223607	SML	0.1	0	-0.1	0.1	EVN
81	6	female	1	1	0	0	0	0.125	0.125	0.125	EVN	0	0.125	0.125	0.125	EVN
75	17	female	1	1	1	1	0	0	0	0	LDA	0	0	0	0	LDA
56	4	female	1	1	0	0	0	0	0	0	LDA	0.125	0	0.125	0.125	EVN
83	10	female	1	1	0	0	0	0	0	0	LDA	0	0	0	0	LDA
81	6	female	0	0	0	0	0.125	0	0.125	0.125	EVN	0.125	0	0.125	0.125	EVN
83	10	female	1	1	0	0	1.05	0.25	-0.3	1.07935	SML	0	0	0	0	LDA
72	3	female	1	0	1	1	0.3	0	-0.3	0.3	SML	0	0.125	0.125	0.125	EVN
62	37	female	1	1	0	0	0.35	0	0.15	0.35	EVN	0.15	0	-0.15	0.15	EVN
68	42	female	0	0	0	0	0	0.25	0.25	0.25	LAR	0	0.125	0.125	0.125	EVN
68	8	female	1	1	0	0	0.1	0	-0.1	0.1	EVN	0.05	0.125	0.075	0.134629	EVN
70	18	male	0	0	0	0	0	0	0	0	LDA	0	0	0	0	LDA
69	14	male	0	0	0	0	0	0.4	-0.4	0.4	SML	0.35	0.583333	0.733333	0.680278	LAR
67	32	female	0	0	0	0	0.175	0	0.075	0.175	EVN	0	0.291667	0.291667	0.291667	LAR
69	36	female	0	0	0	0	0	0.125	0.125	0.125	EVN	0	0.125	0.125	0.125	EVN
77	31	female	1	0	0	0	0	0	0	0	LDA	0	0.5	0.5	0.5	LAR
69	15	female	1	1	0	0	0	0	0	0	LDA	0.7	1.375	-0.325	1.54293	SML
73	12	female	1	1	0	0	0.45	0	0.05	0.45	EVN	0.5	0.725	-0.975	0.880696	SML
64	5	male	0	0	0	0	0	0	0	0	LDA	0	0	0	0	LDA
76	30	male	0	0	0	0	0	0	0	0	LDA	0	0	0	0	LDA
70	11	male	1	0	0	0	0	0	0	0	LDA	0	0	0	0	LDA
71	9	female	0	0	0	0	0.5	0	0.5	0.5	LAR	0	0	0	0	LDA
75	14	female	0	0	1	1	0	0.25	0.25	0.25	LAR	0.3	0.225	0.225	0.375	LAR
73	41	female	0	0	0	0	0	0	0	0	LDA	0.125	0	0.125	0.125	EVN
80	24	female	0	0	0	0	1.15	0.25	0.6	1.17686	LAR	0	0.333333	0.333333	0.333333	LAR
74	28	female	0	0	0	0	0	0	0	0	LDA	0	0	0	0	LDA
82	1	male	1	1	0	0	0.5	0	0.5	0.5	LAR	0.25	0	0.25	0.25	LAR
83	22	female	0	0	0	0	0	0	0	0	LDA	0	0	0	0	LDA
31	8	female	0	0	1	1	0.775	0	0.475	0.775	LAR	0.625	0	0.625	0.625	LAR
57	11	female	0	0	0	0	0.275	0	-0.025	0.275	EVN	0.25	0.125	0.375	0.279508	LAR
66	18	female	1	1	1	1	0	0	0	0	LDA	0	0	0	0	LDA
74	3	female	1	1	0	0	0	0	0	0	LDA	0.125	0	0.125	0.125	EVN
76	17	female	1	1	0	0	0.6	0	0.4	0.6	LAR	0.4	0	0.1	0.4	EVN
67	19	female	1	1	0	0	0.35	0.125	0.275	0.371652	LAR	0.3	0.125	0.325	0.325	LAR
72	36	female	1	1	0	0	0	0	0	0	LDA	0	0	0	0	LDA
71	31	female	0	0	0	0	0.25	0.125	0.375	0.279508	LAR	0.5	0.125	0.625	0.515388	LAR
64	5	female	0	0	0	0	0	1.91667	-0.0833333	1.91667	EVN	0	0.25	0.25	0.25	LAR
74	36	female	1	1	0	0	0.525	0.225	-0.25	0.571183	SML	0.1	0.1	-0.2	0.141421	SML
81	30	female	1	1	0	0	0.25	0	0.25	0.25	LAR	0.25	0	0.25	0.25	LAR
59	10	female	0	0	0	0	0	0	0	0	LDA	0.175	0.125	0.2	0.215058	EVN
73	31	female	0	0	0	0	0.2	0	-0.2	0.2	SML	0.35	0	-0.35	0.35	SML
70	31	female	0	0	0	0	0.1	0.166667	0.0666667	0.194365	EVN	0.1	0	-0.1	0.1	EVN
70	8	female	1	1	0	1	0	0.166667	0.166667	0.166667	EVN	0.1	0	-0.1	0.1	EVN
69	11	female	1	1	0	0	0	0	0	0	LDA	0	0	0	0	LDA
69	16	female	0	0	0	0	0	0	0	0	LDA	0	0	0	0	LDA
73	16	female	1	1	0	0	0	0	0	0	LDA	0	0	0	0	LDA
76	26	female	1	1	0	0	0.25	0.5	-0.25	0.559017	SML	0.25	0.791667	0.0416667	0.830202	EVN
73	7	female	1	1	0	0	0.375	0	0.375	0.375	LAR	0.1	0	-0.1	0.1	EVN
65	10	female	0	0	0	0	0	0	0	0	LDA	0	0	0	0	LDA
69	16	female	0	0	0	0	0	0	0	0	LDA	0	0	0	0	LDA
83	7	female	0	0	0	0	0.125	0	0.125	0.125	EVN	0.725	0.25	0.775	0.766893	LAR
72	7	female	1	1	0	0	0.55	0	0.45	0.55	LAR	0.5	0	0.5	0.5	LAR
50	14	female	1	1	0	0	0	0	0	0	LDA	0	0	0	0	LDA
63	9	female	0	0	0	0	0.25	0.25	0.5	0.353553	LAR	0.25	0	0.25	0.25	LAR
70	7	female	1	1	0	0	0	0	0	0	LDA	0.225	0	0.025	0.225	EVN
61	5	female	1	1	0	0	0	0	0	0	LDA	0	0	0	0	LDA
67	9	female	0	0	0	0	0	0	0	0	LDA	0	0	0	0	LDA
74	16	female	1	1	0	0	0.325	0.225	-0.05	0.395285	EVN	0.625	0.225	0.15	0.664267	EVN
66	30	female	1	1	0	0	0.125	0	0.125	0.125	EVN	0.125	0	0.125	0.125	EVN
78	8	male	1	1	0	0	0.25	0.125	0.375	0.279508	LAR	0.25	0.125	0.375	0.279508	LAR
61	7	female	1	1	0	0	0.25	1.25	-0.5	1.27475	SML	0	0	0	0	LDA
81	4	female	1	1	0	0	0	0	0	0	LDA	0	0	0	0	LDA
72	8	female	1	1	0	0	0	0	0	0	LDA	0.125	0	0.125	0.125	EVN
83	7	female	1	1	0	0	0.125	0	0.125	0.125	EVN	0	0.125	0.125	0.125	EVN
62	22	female	1	1	0	0	0.125	0.125	0.25	0.176777	LAR	0.25	0	0.25	0.25	LAR
65	25	female	1	1	0	0	0.125	0.525	-0.15	0.539676	EVN	0.25	0.125	0.375	0.279508	LAR
48	13	female	1	1	0	0	0	0.1	-0.1	0.1	EVN	0	0	0	0	LDA
77	25	male	1	1	0	0	0	0	0	0	LDA	0	0	0	0	LDA
75	31	female	0	0	0	0	0.125	0	0.125	0.125	EVN	0.125	0	0.125	0.125	EVN
72	25	male	0	0	0	0	0	0	0	0	LDA	0	0	0	0	LDA
76	9	male	0	0	0	0	0.125	0	0.125	0.125	EVN	0.25	0	0.25	0.25	LAR
68	16	male	0	0	0	0	0	0	0	0	LDA	0	0	0	0	LDA
41	23	female	0	0	0	0	0	0	0	0	LDA	0.125	0	0.125	0.125	EVN
63	24	female	1	1	0	0	0	0	0	0	LDA	0	0	0	0	LDA
73	4	female	1	1	0	0	0.2	0	-0.2	0.2	SML	0.2	0	-0.2	0.2	SML
79	23	female	1	1	0	0	0.25	0	0.25	0.25	LAR	0.25	0	0.25	0.25	LAR
77	28	female	1	1	0	0	0	0	0	0	LDA	0	0	0	0	LDA
78	24	female	0	0	0	0	0.375	0.25	0.125	0.450694	EVN	0	0.25	0.25	0.25	LAR
68	11	female	1	1	0	1	0.3	1.41667	-0.383333	1.44808	SML	0	0.2	-0.2	0.2	SML
80	6	female	0	0	0	0	0.05	0	-0.05	0.05	LDA	0	0	0	0	LDA
72	3	female	1	1	0	0	0	0	0	0	LDA	0	0	0	0	LDA
85	17	male	0	0	0	0	0	0	0	0	LDA	0	0	0	0	LDA
82	24	female	0	0	1	1	0.175	0	0.075	0.175	EVN	0.125	0	0.125	0.125	EVN
71	23	female	1	1	0	0	0	0.8	-0.8	0.8	SML	0	0	0	0	LDA
75	26	female	1	1	0	0	0	0	0	0	LDA	0.25	0	0.25	0.25	LAR
40	3	female	1	1	0	0	0	0	0	0	LDA	0	0.291667	0.291667	0.291667	LAR
78	12	female	0	0	0	0	0	0	0	0	LDA	0	0	0	0	LDA
59	40	female	1	1	0	0	0.55	0	-0.05	0.55	EVN	0	0.8	-0.8	0.8	SML
74	31	female	1	1	0	0	0	0.125	0.125	0.125	EVN	0	0.125	0.125	0.125	EVN
72	38	female	1	1	0	0	0	0	0	0	LDA	0	0	0	0	LDA
58	28	female	1	1	0	0	0	0	0	0	LDA	0.25	0	0.25	0.25	LAR
53	10	female	1	1	0	0	0.05	0	-0.05	0.05	LDA	0	0	0	0	LDA
74	41	female	0	0	0	0	0.55	0.125	0.575	0.564026	LAR	0.55	0.6	-0.15	0.813941	EVN
59	9	female	1	1	0	0	0	0	0	0	LDA	0	0	0	0	LDA
68	24	male	1	1	0	0	0	0.125	0.125	0.125	EVN	0	0.125	0.125	0.125	EVN
84	11	female	0	0	0	0	0	0	0	0	LDA	0	0	0	0	LDA
77	5	male	1	1	0	0	0	0	0	0	LDA	0	0	0	0	LDA
36	23	female	0	0	1	1	0	0	0	0	LDA	0	0	0	0	LDA
65	14	female	1	1	0	0	0.05	0	-0.05	0.05	LDA	0	0	0	0	LDA
46	25	female	1	1	0	1	0.5	0.291667	0.791667	0.578852	LAR	1.35	2.28333	1.03333	2.65257	LAR
88	22	female	0	0	0	0	0	0	0	0	LDA	0	0	0	0	LDA
65	22	female	0	0	0	0	0.125	0	0.125	0.125	EVN	0	0	0	0	LDA
69	0	female	0	1	0	0	0.1	0	-0.1	0.1	EVN	0	0	0	0	LDA
81	30	female	1	1	0	0	0	0	0	0	LDA	0	0	0	0	LDA
64	23	female	1	0	0	0	0.375	0.125	0.5	0.395285	LAR	0.375	0	0.375	0.375	LAR
55	22	male	0	0	0	0	0	0	0	0	LDA	0	0	0	0	LDA
74	5	female	0	0	0	0	0.375	0.25	0.625	0.450694	LAR	0.725	0.6	0.925	0.941077	LAR
54	2	female	0	0	0	0	0	0	0	0	LDA	0.1	0	-0.1	0.1	EVN
40	36	female	1	1	1	1	0	0	0	0	LDA	0	0	0	0	LDA
75	21	female	0	0	0	0	0.25	0.5	0.75	0.559017	LAR	0	0.291667	0.291667	0.291667	LAR
79	30	female	1	1	0	0	0.25	0	0.25	0.25	LAR	0.125	0	0.125	0.125	EVN
77	37	female	0	0	1	1	0.175	0	0.075	0.175	EVN	0	0	0	0	LDA
67	30	male	0	0	0	0	0	0	0	0	LDA	0	0	0	0	LDA
64	30	female	0	0	0	0	0.25	0	0.25	0.25	LAR	0.5	0	0	0.5	EVN
57	29	female	0	0	0	0	0	0.125	0.125	0.125	EVN	0	0	0	0	LDA
63	32	female	1	1	0	0	0	0	0	0	LDA	0	0	0	0	LDA
79	29	female	0	0	0	0	0.25	0	0.25	0.25	LAR	0.3	0	0.2	0.3	EVN
90	13	female	0	0	0	0	0.25	0	0.25	0.25	LAR	0	0	0	0	LDA
69	19	female	1	1	0	0	0	0	0	0	LDA	0.45	0	0.05	0.45	EVN
68	31	female	1	1	1	1	0	0	0	0	LDA	0	0	0	0	LDA
64	13	female	1	1	0	0	0	0	0	0	LDA	0	0	0	0	LDA
72	3	male	1	1	0	0	0	0	0	0	LDA	0	0	0	0	LDA
81	15	male	0	0	0	0	0	0	0	0	LDA	0	0	0	0	LDA
79	15	male	0	0	0	0	0.125	0	0.125	0.125	EVN	0.225	0	0.025	0.225	EVN
78	31	female	0	1	0	0	0.125	0.225	0.15	0.257391	EVN	0.6	0.783333	0.783333	0.986717	LAR
77	29	female	1	1	0	0	0.225	0	0.025	0.225	EVN	0.3	0	-0.3	0.3	SML
69	8	female	1	1	1	1	0	0	0	0	LDA	0	0	0	0	LDA
65	13	female	1	1	0	0	0.5	0.125	0.625	0.515388	LAR	0.25	0	0.25	0.25	LAR
88	24	female	0	0	0	0	0.125	0	0.125	0.125	EVN	0	0	0	0	LDA
60	20	female	1	1	0	0	0	0	0	0	LDA	0.1	0.2	-0.3	0.223607	SML
76	21	female	1	0	0	0	0	0	0	0	LDA	0	0	0	0	LDA
75	10	male	1	1	0	0	0.325	0.125	0.05	0.34821	EVN	0	0	0	0	LDA
64	29	female	1	1	0	0	0.45	0	0.05	0.45	EVN	0	0	0	0	LDA
60	25	female	1	1	0	0	0.35	0.125	0.275	0.371652	LAR	0.25	0.125	0.375	0.279508	LAR
73	8	female	1	1	0	0	0.1	0	-0.1	0.1	EVN	0	0	0	0	LDA
58	11	female	0	0	1	0	0.125	0	0.125	0.125	EVN	0.25	0	0.25	0.25	LAR
67	29	female	1	1	0	0	0	0	0	0	LDA	0	0	0	0	LDA
79	7	female	1	1	0	0	0	0	0	0	LDA	0	0	0	0	LDA
75	35	female	0	0	0	0	0	0	0	0	LDA	0	0	0	0	LDA
66	28	female	1	1	0	0	0.125	0	0.125	0.125	EVN	0.25	0	0.25	0.25	LAR
67	8	female	0	1	0	0	0.3	0	0.2	0.3	EVN	0.175	0.291667	0.366667	0.340139	LAR
81	41	female	0	0	0	0	0.375	0	0.375	0.375	LAR	0.25	0	0.25	0.25	LAR
56	9	female	1	1	0	0	0.05	0.125	0.075	0.134629	EVN	0	0.125	0.125	0.125	EVN
52	29	male	1	1	0	0	0	0	0	0	LDA	0	0	0	0	LDA
66	31	female	0	0	0	0	0.25	0	0.25	0.25	LAR	0.25	0	0.25	0.25	LAR
33	8	female	1	1	0	0	0	0	0	0	LDA	0	0	0	0	LDA
74	28	female	1	1	0	0	0	0	0	0	LDA	0	0	0	0	LDA
74	10	female	0	0	0	0	0	0	0	0	LDA	0.1	0.166667	0.0666667	0.194365	EVN
55	12	female	0	0	0	0	0.125	0	0.125	0.125	EVN	0.225	0	0.025	0.225	EVN
77	21	male	1	1	0	0	0	0	0	0	LDA	0	0	0	0	LDA
70	28	female	1	1	0	0	0.1	0	-0.1	0.1	EVN	0.05	0	-0.05	0.05	LDA
66	9	female	1	1	0	0	0	0	0	0	LDA	0.875	0.325	0.3	0.933408	LAR
67	13	female	1	1	0	0	0	0	0	0	LDA	0.25	0	0.25	0.25	LAR
72	29	female	0	1	0	0	0	0	0	0	LDA	0	0.125	0.125	0.125	EVN
72	28	female	0	0	1	1	0.5	0	-0.5	0.5	SML	0.775	0.5	-0.525	0.922293	SML
59	4	male	1	1	0	0	0.25	0.25	0.5	0.353553	LAR	0	0.25	0.25	0.25	LAR
53	14	female	1	1	0	0	0.275	0	-0.025	0.275	EVN	0.225	0	0.025	0.225	EVN
78	7	male	0	0	0	0	0	0	0	0	LDA	0	0	0	0	LDA
45	28	female	0	0	0	0	0.6	0	-0.6	0.6	SML	0.65	0	-0.65	0.65	SML
65	1	female	1	1	0	0	0	0	0	0	LDA	0	0	0	0	LDA
75	5	female	1	1	0	0	0	0	0	0	LDA	0.25	0	0.25	0.25	LAR
42	3	female	1	1	0	0	0	0	0	0	LDA	0	0.416667	0.416667	0.416667	LAR
63	10	female	0	0	0	0	0	0	0	0	LDA	0.125	0	0.125	0.125	EVN
61	34	female	0	0	1	1	0.2	0	-0.2	0.2	SML	0	0	0	0	LDA
61	11	female	1	1	0	0	0	0	0	0	LDA	0	0	0	0	LDA
66	39	female	1	1	0	0	0.25	0	0.25	0.25	LAR	0.25	0	0.25	0.25	LAR
58	10	female	1	1	0	0	0	0	0	0	LDA	0.1	0	-0.1	0.1	EVN
67	9	female	0	0	0	0	0.25	0.125	0.375	0.279508	LAR	0	0	0	0	LDA
55	26	female	0	0	0	0	0	0	0	0	LDA	0	0	0	0	LDA
70	2	female	1	1	0	0	0.3	0	-0.3	0.3	SML	0	0.25	0.25	0.25	LAR
77	28	female	0	0	0	0	0.125	0	0.125	0.125	EVN	0.125	0	0.125	0.125	EVN
78	10	female	0	0	0	0	0	0	0	0	LDA	0	0	0	0	LDA
67	0	female	0	0	0	1	0.3	0.25	0.45	0.390512	LAR	0.45	0.25	0.3	0.514782	LAR
63	14	female	1	1	0	0	0	0	0	0	LDA	0	0	0	0	LDA
67	28	female	0	0	0	0	0.45	0.6	0.45	0.75	LAR	0.1	0	-0.1	0.1	EVN
76	30	female	1	1	0	0	0	0	0	0	LDA	0	0	0	0	LDA
57	32	female	0	1	0	0	0.125	0	0.125	0.125	EVN	0	0	0	0	LDA
70	26	female	1	1	0	0	0	0	0	0	LDA	0	0	0	0	LDA
72	9	female	0	0	0	0	0.125	0	0.125	0.125	EVN	0.25	0	0.25	0.25	LAR
66	40	female	1	1	0	0	0.25	0	0.25	0.25	LAR	0.125	0	0.125	0.125	EVN
65	8	female	0	1	0	0	1.275	0.333333	0.808333	1.31785	LAR	0	0	0	0	LDA
70	28	female	1	1	0	0	0	0	0	0	LDA	0	0.125	0.125	0.125	EVN
79	29	female	0	0	0	0	0	0	0	0	LDA	0.125	0	0.125	0.125	EVN
58	4	female	1	1	0	0	0	0	0	0	LDA	0	0	0	0	LDA
78	27	female	1	1	0	0	0.725	0.2	-0.175	0.75208	EVN	0	0	0	0	LDA
68	12	female	0	0	0	0	0	0	0	0	LDA	0	0	0	0	LDA
70	2	female	1	1	0	0	0	0	0	0	LDA	0.2	0	-0.2	0.2	SML
61	12	female	1	1	0	0	0.85	0	0.15	0.85	EVN	0.7	0	0.3	0.7	LAR
75	8	female	1	1	0	0	0	0	0	0	LDA	0	0	0	0	LDA
75	32	female	0	0	0	0	0	0	0	0	LDA	0	0	0	0	LDA
49	10	female	1	1	0	0	0	0	0	0	LDA	0	0	0	0	LDA
75	18	female	1	1	0	0	0	0	0	0	LDA	0	0	0	0	LDA
55	39	female	0	0	0	0	0	0.291667	0.291667	0.291667	LAR	0	0.333333	0.333333	0.333333	LAR
68	40	female	0	0	0	0	0	0	0	0	LDA	0	0	0	0	LDA
66	4	female	1	0	0	0	0.475	0.125	0.4	0.491172	LAR	0.95	0.475	0.825	1.06213	LAR
72	19	female	1	1	0	0	0	0	0	0	LDA	0	0	0	0	LDA
82	4	female	1	1	1	1	0	0	0	0	LDA	0.125	0	0.125	0.125	EVN
73	35	female	1	1	0	0	0.25	0.166667	0.416667	0.300463	LAR	0.125	0.291667	0.416667	0.317324	LAR
62	24	female	1	1	0	0	0.1	0	-0.1	0.1	EVN	0.2	0	-0.2	0.2	SML
87	13	female	0	0	0	0	0.125	0.583333	0.708333	0.596576	LAR	0.65	0	0.35	0.65	LAR
76	42	female	1	1	0	0	0	0	0	0	LDA	0.125	0.125	0.25	0.176777	LAR
86	3	female	0	1	0	0	0.375	1.66667	-0.458333	1.70833	SML	1.3	3.16667	-1.13333	3.42312	SML
82	21	female	1	1	0	0	0	0	0	0	LDA	0.375	0	0.375	0.375	LAR
84	27	female	0	0	0	0	0	0.125	0.125	0.125	EVN	0	0	0	0	LDA
75	25	female	0	0	0	0	0	0	0	0	LDA	0	0	0	0	LDA
68	10	male	0	0	1	1	0	0	0	0	LDA	0	0	0	0	LDA
91	15	female	0	0	0	0	0	0.25	0.25	0.25	LAR	0	0.25	0.25	0.25	LAR
80	13	female	1	0	0	0	0.125	0	0.125	0.125	EVN	0	0	0	0	LDA
64	28	female	0	1	1	0	1.15	0.4	0.45	1.21758	LAR	0.725	0.125	0.65	0.735697	LAR
74	19	female	0	0	0	0	0	0	0	0	LDA	0.25	0	0.25	0.25	LAR
75	26	female	1	1	0	0	0	0	0	0	LDA	0	0	0	0	LDA
69	7	female	1	1	0	0	0	0	0	0	LDA	0	0	0	0	LDA
65	15	female	1	1	0	0	0.05	0	-0.05	0.05	LDA	0	0	0	0	LDA
48	25	female	0	0	0	0	0.6	0.25	0.65	0.65	LAR	0.25	0	0.25	0.25	LAR
66	13	female	1	1	0	0	0.05	0	-0.05	0.05	LDA	0	0	0	0	LDA
72	0	female	1	1	0	0	0	0	0	0	LDA	0.375	0.125	0.5	0.395285	LAR
80	39	female	1	1	0	0	0	0	0	0	LDA	0.2	1.275	-0.725	1.29059	SML
63	31	female	0	0	1	1	0.3	0.25	-0.05	0.390512	EVN	0.1	0.125	0.025	0.160078	EVN
70	6	male	0	0	0	0	0	0	0	0	LDA	0	0	0	0	LDA
75	25	female	1	1	0	0	0.325	0	-0.075	0.325	EVN	0.6	0	0.4	0.6	LAR
71	11	female	1	1	0	0	0	0.125	0.125	0.125	EVN	0	0.25	0.25	0.25	LAR
64	1	female	0	0	0	0	0.5	0	0.5	0.5	LAR	0.25	0	0.25	0.25	LAR
90	37	female	1	1	0	0	0	0	0	0	LDA	0	0	0	0	LDA
72	34	female	1	1	0	0	0.3	0.166667	0.366667	0.343188	LAR	0.225	0.166667	0.191667	0.280005	EVN
67	1	female	1	1	0	0	0	0	0	0	LDA	0.1	0	-0.1	0.1	EVN
66	25	female	0	0	0	0	0	0.125	0.125	0.125	EVN	0	0	0	0	LDA
88	7	female	0	0	0	0	0.25	0	0.25	0.25	LAR	0.25	0	0.25	0.25	LAR
73	25	female	0	0	0	0	0.25	0	0.25	0.25	LAR	0.65	0	-0.15	0.65	EVN
68	13	female	1	1	0	0	0.15	0	-0.15	0.15	EVN	0	0	0	0	LDA
69	9	female	1	1	0	0	0	0	0	0	LDA	0.75	0.75	0.5	1.06066	LAR
80	30	female	0	0	0	0	0.25	0.125	0.375	0.279508	LAR	0.1	0.125	0.025	0.160078	EVN
53	17	female	1	1	1	1	0	0.125	0.125	0.125	EVN	0.125	0.125	0.25	0.176777	LAR
42	1	female	0	0	0	0	0	0.125	0.125	0.125	EVN	0	0	0	0	LDA
73	22	female	0	0	0	0	0.125	0	0.125	0.125	EVN	0.275	0	-0.025	0.275	EVN
70	25	male	0	0	0	0	0	0	0	0	LDA	0	0	0	0	LDA
80	4	female	0	0	0	0	0.125	0	0.125	0.125	EVN	0	0	0	0	LDA
70	22	female	1	1	0	0	0	0	0	0	LDA	0.125	0	0.125	0.125	EVN
66	2	female	1	1	0	1	0.35	0.4	-0.25	0.531507	SML	0.175	0.125	0.2	0.215058	EVN
73	24	female	1	1	0	0	0	0	0	0	LDA	0	0	0	0	LDA
78	32	female	1	1	0	1	0.1	0	-0.1	0.1	EVN	0	0	0	0	LDA
74	21	female	1	1	0	0	0.25	0	0.25	0.25	LAR	0	0	0	0	LDA
73	11	male	1	1	0	0	0	0	0	0	LDA	0.1	0	-0.1	0.1	EVN
72	2	male	1	0	0	0	0.125	0	0.125	0.125	EVN	0.25	0	0.25	0.25	LAR
74	23	female	0	0	0	0	0	0	0	0	LDA	0	0	0	0	LDA
62	21	female	0	0	0	0	0	0	0	0	LDA	0	0	0	0	LDA
75	14	female	0	0	0	0	0	0	0	0	LDA	0	0	0	0	LDA
75	25	female	1	1	0	0	0.15	0	-0.15	0.15	EVN	0.125	0	0.125	0.125	EVN
83	20	female	1	1	0	0	0.25	0	0.25	0.25	LAR	0	0	0	0	LDA
74	22	female	0	0	1	1	0	0	0	0	LDA	0	0	0	0	LDA
82	9	female	0	0	0	0	0.125	0	0.125	0.125	EVN	0	0	0	0	LDA
66	21	male	1	1	0	0	0	0	0	0	LDA	0	0	0	0	LDA
74	20	female	1	1	0	0	0.1	0	-0.1	0.1	EVN	0.55	0	-0.05	0.55	EVN
74	20	female	0	1	0	0	0	0	0	0	LDA	0.25	0	0.25	0.25	LAR
51	4	female	1	1	0	0	0.35	0	0.15	0.35	EVN	0.15	0	-0.15	0.15	EVN
53	26	female	1	1	0	0	0.3	0	-0.3	0.3	SML	0	0	0	0	LDA
47	11	male	0	0	0	0	0	0	0	0	LDA	0	0	0	0	LDA
63	2	female	1	1	0	0	0	0	0	0	LDA	0.525	0	-0.275	0.525	SML
57	2	female	1	1	0	0	0.25	0	0.25	0.25	LAR	0	0	0	0	LDA
71	16	female	1	1	0	0	0.05	0	-0.05	0.05	LDA	0	0	0	0	LDA
71	5	male	1	0	0	0	0	0	0	0	LDA	0.225	0	0.025	0.225	EVN
51	5	female	1	1	0	0	0.125	0	0.125	0.125	EVN	0	0	0	0	LDA
76	10	female	0	0	1	1	1	0.833333	1.83333	1.30171	LAR	1	1.16667	2.16667	1.53659	LAR
68	3	female	1	1	0	0	0.1	0	-0.1	0.1	EVN	0	0	0	0	LDA
72	20	male	0	0	0	0	0	0	0	0	LDA	0	0	0	0	LDA
69	23	male	1	1	0	0	0	0.4	-0.4	0.4	SML	0.05	0.8	-0.85	0.801561	SML
47	21	female	1	1	0	0	0.85	0	0.65	0.85	LAR	0	0	0	0	LDA
80	35	male	1	1	0	0	0	0	0	0	LDA	0	0	0	0	LDA
71	19	female	1	1	0	0	0	0	0	0	LDA	0	0	0	0	LDA
52	10	female	1	1	1	1	0.05	0	-0.05	0.05	LDA	0.05	0	-0.05	0.05	LDA
60	20	female	1	1	0	0	0.25	0.125	0.375	0.279508	LAR	0	0.125	0.125	0.125	EVN
74	19	female	1	1	0	0	0.3	0	-0.3	0.3	SML	0.4	0	-0.4	0.4	SML
63	22	female	1	1	0	0	0.05	0	-0.05	0.05	LDA	0	0	0	0	LDA
76	30	female	1	1	0	0	0	0	0	0	LDA	0.05	0.25	0.2	0.254951	EVN
57	4	female	0	0	0	0	0	0	0	0	LDA	0	0	0	0	LDA
59	3	female	1	1	0	0	0	0	0	0	LDA	0.125	0	0.125	0.125	EVN
59	6	female	1	1	1	1	0.25	0.125	0.375	0.279508	LAR	0.25	0	0.25	0.25	LAR
67	17	male	0	0	0	0	0.125	0	0.125	0.125	EVN	0	0	0	0	LDA
66	16	female	1	1	0	0	0	0	0	0	LDA	0.275	0	-0.025	0.275	EVN
71	22	female	1	1	1	1	0.125	0	0.125	0.125	EVN	0	0.166667	0.166667	0.166667	EVN
51	18	female	1	1	0	0	0	0.125	0.125	0.125	EVN	0	0	0	0	LDA
48	25	female	1	1	0	0	0	0	0	0	LDA	0.475	0	0.275	0.475	LAR
62	16	female	1	1	0	0	0.375	0.25	0.625	0.450694	LAR	0	0	0	0	LDA
80	22	female	1	1	0	0	0	0	0	0	LDA	0	0	0	0	LDA
44	6	female	1	1	0	0	0.05	0.125	0.075	0.134629	EVN	0	0	0	0	LDA
71	17	female	0	0	0	0	0	0	0	0	LDA	0	0	0	0	LDA
73	16	female	1	1	0	0	0	0	0	0	LDA	0	0	0	0	LDA
80	30	female	1	1	0	0	0	0	0	0	LDA	0	0	0	0	LDA
63	44	female	1	1	0	0	0.25	0	0.25	0.25	LAR	0	0	0	0	LDA
71	16	female	1	1	0	0	0.125	0	0.125	0.125	EVN	0	0	0	0	LDA
48	20	female	1	1	1	1	0.4	0.858333	0.158333	0.946962	EVN	0	0	0	0	LDA
59	21	female	0	0	0	0	0	0	0	0	LDA	0	0	0	0	LDA
56	16	female	1	1	0	0	0.15	0	-0.15	0.15	EVN	0	0	0	0	LDA
77	15	male	1	1	0	0	0.25	0	0.25	0.25	LAR	0.25	0	0.25	0.25	LAR
66	16	female	0	1	0	0	0	0	0	0	LDA	0	0	0	0	LDA
77	16	female	1	1	0	0	0	0	0	0	LDA	0.125	0	0.125	0.125	EVN
50	29	female	0	0	0	0	0.25	0	0.25	0.25	LAR	0.25	0	0.25	0.25	LAR
54	16	male	1	1	0	0	0	0.4	-0.4	0.4	SML	0.25	0	0.25	0.25	LAR
85	42	male	0	0	0	0	0	0	0	0	LDA	0	0	0	0	LDA
65	17	female	0	0	1	0	0.425	0	-0.175	0.425	EVN	0.4	0.125	-0.275	0.419076	SML
73	14	female	1	1	0	0	0.5	0	0.5	0.5	LAR	0.55	0	0.45	0.55	LAR
65	24	female	1	1	1	0	0	0	0	0	LDA	0.6	0	-0.6	0.6	SML
68	7	male	1	1	0	0	0	0	0	0	LDA	0	0	0	0	LDA
49	15	female	0	0	0	0	0	0	0	0	LDA	0	0	0	0	LDA
67	24	female	0	0	0	0	0	0	0	0	LDA	0.35	0	0.15	0.35	EVN
70	16	female	0	0	0	0	0.125	0	0.125	0.125	EVN	0	0	0	0	LDA
77	18	female	1	1	0	0	0	0.166667	0.166667	0.166667	EVN	0.125	0.166667	0.291667	0.208333	LAR
69	18	female	0	0	0	0	0	0	0	0	LDA	0.3	0	0.2	0.3	EVN
74	17	female	1	1	1	1	0	0	0	0	LDA	0	0	0	0	LDA
50	15	female	1	1	0	0	0.125	0	0.125	0.125	EVN	0.175	0	0.075	0.175	EVN
72	0	female	0	1	0	0	0.25	0	0.25	0.25	LAR	0.125	0	0.125	0.125	EVN
52	17	female	1	1	0	0	0	0	0	0	LDA	0	0	0	0	LDA
43	5	female	1	1	0	0	0.25	0	0.25	0.25	LAR	0.125	0	0.125	0.125	EVN
50	15	female	0	0	0	0	0	0	0	0	LDA	0	0	0	0	LDA
69	18	female	0	0	1	1	0	0	0	0	LDA	0	0	0	0	LDA
43	6	male	1	1	1	1	0	0	0	0	LDA	0	0	0	0	LDA
69	42	female	0	0	0	0	0	0	0	0	LDA	0	0	0	0	LDA
82	15	male	0	0	0	0	0	0	0	0	LDA	0	0	0	0	LDA
65	16	female	1	1	1	1	0	0	0	0	LDA	0.2	0	-0.2	0.2	SML
67	19	female	1	1	0	0	0.675	0.375	0.45	0.772172	LAR	0.375	0.475	0.65	0.605186	LAR
62	33	female	1	1	0	0	0	0	0	0	LDA	0	0	0	0	LDA
72	41	female	0	0	0	0	0.375	0	0.375	0.375	LAR	0	0	0	0	LDA
68	16	female	0	0	0	0	0.375	0	0.375	0.375	LAR	0	0	0	0	LDA
69	6	female	0	0	0	0	0.25	0	0.25	0.25	LAR	0.25	0.125	0.375	0.279508	LAR
60	15	female	1	1	0	0	0.3	0.1	0.1	0.316228	EVN	0.5	0.2	0.3	0.538516	LAR
70	16	male	0	0	1	0	0	0.25	0.25	0.25	LAR	0.225	0.25	0.275	0.336341	LAR
78	15	female	0	0	0	0	0.125	0	0.125	0.125	EVN	0	0	0	0	LDA
73	19	female	0	0	0	0	0	0	0	0	LDA	0	0	0	0	LDA
72	15	male	0	0	0	0	0	0	0	0	LDA	0	0	0	0	LDA
52	7	female	0	0	0	0	0.1	0.125	0.025	0.160078	EVN	0.15	0	-0.15	0.15	EVN
67	13	female	1	1	0	0	0.6	1	-1.6	1.16619	SML	1.175	0	-0.425	1.175	SML
83	25	female	1	0	0	0	0	0	0	0	LDA	0.4	0	-0.4	0.4	SML
69	12	female	1	1	0	0	0	0	0	0	LDA	0	0	0	0	LDA
64	54	female	0	0	0	0	0	0	0	0	LDA	0	0.1	-0.1	0.1	EVN
58	20	female	1	1	0	0	0.425	0.125	-0.05	0.443001	EVN	0.225	0.25	0.275	0.336341	LAR
71	14	female	0	1	0	0	0.5	1.25	-0.25	1.34629	SML	1.15	1.25	-0.4	1.69853	SML
47	15	female	0	0	1	1	0.175	0	0.075	0.175	EVN	0	0	0	0	LDA
52	20	female	1	1	0	0	0	0	0	0	LDA	0	0	0	0	LDA
82	33	female	1	1	0	0	0	0	0	0	LDA	0	0	0	0	LDA
38	19	male	0	0	0	1	0.25	0	0.25	0.25	LAR	0.25	0	0.25	0.25	LAR
68	21	female	0	0	0	0	0.2	0.291667	0.0916667	0.353652	EVN	0.05	0	-0.05	0.05	LDA
69	12	female	1	1	0	0	0	0	0	0	LDA	0	0	0	0	LDA
81	19	female	0	0	0	0	0	0	0	0	LDA	0	0	0	0	LDA
78	28	female	1	1	0	0	0.125	0	0.125	0.125	EVN	0	0	0	0	LDA
67	20	female	0	0	0	0	0	0.125	0.125	0.125	EVN	0	0	0	0	LDA
75	21	male	1	1	0	0	0	0	0	0	LDA	0	0	0	0	LDA
71	21	female	1	1	0	0	0	0	0	0	LDA	0.05	0	-0.05	0.05	LDA
75	32	female	1	1	1	1	0.5	0.25	0.75	0.559017	LAR	0.25	0	0.25	0.25	LAR
63	19	female	1	1	0	0	0.175	0.125	0.2	0.215058	EVN	0	0.125	0.125	0.125	EVN
72	20	male	1	1	0	0	0	0	0	0	LDA	0	0.5	0.5	0.5	LAR
78	20	female	1	1	0	0	0	0	0	0	LDA	0	0	0	0	LDA
64	18	female	1	1	0	0	0	0.166667	0.166667	0.166667	EVN	0	0	0	0	LDA
48	19	female	1	1	0	0	0	0	0	0	LDA	0	0	0	0	LDA
43	21	female	1	1	0	0	0	0	0	0	LDA	0	0	0	0	LDA
73	1	male	0	0	0	0	0.25	0	0.25	0.25	LAR	0.375	0	0.375	0.375	LAR
64	15	female	1	1	0	0	0	0	0	0	LDA	0.375	0	0.375	0.375	LAR
69	8	female	1	1	0	0	0	0	0	0	LDA	0	0	0	0	LDA
76	18	female	1	1	0	0	0.125	0	0.125	0.125	EVN	0.125	0	0.125	0.125	EVN
81	8	female	1	1	0	0	0	0	0	0	LDA	0	0.291667	0.291667	0.291667	LAR
71	4	female	1	1	0	0	0	0	0	0	LDA	0	0	0	0	LDA
46	21	female	0	0	0	0	0	0	0	0	LDA	0	0	0	0	LDA
84	27	female	0	0	0	0	0	0	0	0	LDA	0.125	0	0.125	0.125	EVN
69	19	female	0	0	0	0	0.225	0	0.025	0.225	EVN	0	0	0	0	LDA
88	23	female	0	0	0	0	0.2	0	-0.2	0.2	SML	0.25	0.4	-0.15	0.471699	EVN
48	27	female	1	1	0	0	0.625	0	0.125	0.625	EVN	0.625	0.166667	0.291667	0.646841	LAR
43	1	female	1	1	0	0	0.55	0.6	-1.15	0.813941	SML	0.125	0.1	0.025	0.160078	EVN
46	4	female	0	0	0	0	0	0	0	0	LDA	0.4	0	-0.4	0.4	SML
79	23	male	0	0	0	0	0	0	0	0	LDA	0	0	0	0	LDA
64	4	female	1	1	0	0	0	0	0	0	LDA	0	0.125	0.125	0.125	EVN
72	39	female	1	1	0	0	0	0	0	0	LDA	0	0	0	0	LDA
70	18	female	0	0	0	0	0.35	0.1	0.05	0.364005	EVN	0.25	0.125	0.375	0.279508	LAR
42	6	female	1	1	1	1	0.275	0	-0.025	0.275	EVN	0.2	0	-0.2	0.2	SML
70	8	female	1	1	0	0	0	0	0	0	LDA	0	0	0	0	LDA
63	23	female	0	0	1	1	0.125	0	0.125	0.125	EVN	0	0	0	0	LDA
67	19	female	0	0	0	0	0	0	0	0	LDA	0	0	0	0	LDA
57	18	male	1	1	0	0	0.5	0.125	0.625	0.515388	LAR	0	0	0	0	LDA
70	18	female	0	0	1	1	0.375	0	0.375	0.375	LAR	0.25	0	0.25	0.25	LAR
61	19	male	1	1	0	0	0.15	0	-0.15	0.15	EVN	0.15	0	-0.15	0.15	EVN
69	21	female	1	1	0	0	0	0	0	0	LDA	0	0	0	0	LDA
73	18	female	0	0	0	0	0	0	0	0	LDA	0.1	0.125	0.025	0.160078	EVN
53	18	female	0	0	0	0	0	0	0	0	LDA	0	0	0	0	LDA
81	32	female	0	0	0	0	0	0	0	0	LDA	0	0	0	0	LDA
73	18	female	1	1	0	0	0.45	0	0.05	0.45	EVN	0.3	0	0.2	0.3	EVN
60	10	female	1	1	0	0	0.5	0.125	0.625	0.515388	LAR	0.125	0	0.125	0.125	EVN
74	17	male	1	1	0	0	0	0	0	0	LDA	0	0	0	0	LDA
53	18	female	1	1	0	0	0	0	0	0	LDA	0	0	0	0	LDA
72	18	female	1	1	0	0	0.1	0.125	0.025	0.160078	EVN	0	0.25	0.25	0.25	LAR
79	1	female	0	0	0	0	0.125	0	0.125	0.125	EVN	0.25	0	0.25	0.25	LAR
55	17	female	1	1	0	0	0.1	0	-0.1	0.1	EVN	0	0	0	0	LDA
60	19	female	1	1	0	0	0	0	0	0	LDA	0	0	0	0	LDA
73	13	female	0	0	1	1	0.125	0	0.125	0.125	EVN	0.125	0	0.125	0.125	EVN
54	1	female	0	1	0	0	0.4	1	-1.4	1.07703	SML	0	0	0	0	LDA
72	22	female	0	0	0	0	0.125	0.1	0.025	0.160078	EVN	0	0	0	0	LDA
55	25	female	0	0	0	0	0	0	0	0	LDA	0.1	0	-0.1	0.1	EVN
70	1	female	1	1	0	0	0.75	0.675	0.325	1.00902	LAR	0.9	0.475	0.375	1.01766	LAR
63	0	female	0	0	0	0	0.15	0.733333	-0.216667	0.748517	SML	0.05	0	-0.05	0.05	LDA
73	20	female	1	1	0	0	0.1	0	-0.1	0.1	EVN	0	0	0	0	LDA
74	20	male	1	1	0	0	0.125	0.25	0.375	0.279508	LAR	0	0.25	0.25	0.25	LAR
87	17	female	1	1	0	0	0	0	0	0	LDA	0.25	0	0.25	0.25	LAR
78	18	female	0	0	0	0	0	0	0	0	LDA	0	0	0	0	LDA
78	17	female	0	0	0	0	0	0	0	0	LDA	0.125	0	0.125	0.125	EVN
69	17	female	0	0	0	0	0	0	0	0	LDA	0	0	0	0	LDA
61	19	female	0	0	0	0	0	0	0	0	LDA	0	0	0	0	LDA
75	17	female	1	1	0	0	0	0	0	0	LDA	0	0	0	0	LDA
68	17	female	1	1	0	0	0	0	0	0	LDA	0	0	0	0	LDA
66	17	female	0	0	0	0	0	0	0	0	LDA	0	0	0	0	LDA
54	17	female	1	1	0	0	0	0	0	0	LDA	0	0	0	0	LDA
65	17	female	0	0	0	0	0.125	0	0.125	0.125	EVN	0.375	0	0.375	0.375	LAR
71	17	female	0	0	0	0	0	0	0	0	LDA	0	0	0	0	LDA
73	34	female	0	0	0	0	0	0	0	0	LDA	0	0	0	0	LDA
68	17	female	1	1	0	0	0	0	0	0	LDA	0	0.125	0.125	0.125	EVN
60	33	female	1	1	0	0	0	0.125	0.125	0.125	EVN	0	0	0	0	LDA
74	19	male	1	1	0	0	0	0	0	0	LDA	0	0.125	0.125	0.125	EVN
59	31	female	0	1	0	0	0.4	0	-0.4	0.4	SML	0.9	0.25	0.35	0.934077	LAR
68	33	female	1	1	0	0	0	0	0	0	LDA	0	0	0	0	LDA
74	13	female	0	0	0	0	0	0	0	0	LDA	0	0	0	0	LDA
80	18	female	0	0	0	0	0	0	0	0	LDA	0	0	0	0	LDA
75	17	female	0	0	0	0	0	0.125	0.125	0.125	EVN	0.15	0	-0.15	0.15	EVN
77	16	female	1	1	1	1	0.125	0	0.125	0.125	EVN	0	0	0	0	LDA
78	23	female	1	1	0	0	0.5	0	0.5	0.5	LAR	0	0	0	0	LDA
71	13	male	0	0	0	0	0	0	0	0	LDA	0	0	0	0	LDA
68	20	female	0	1	0	0	0.25	0	0.25	0.25	LAR	0.125	0	0.125	0.125	EVN
66	0	male	1	1	0	0	0	0	0	0	LDA	0.25	0	-0.25	0.25	SML
74	16	male	0	0	0	0	0	0	0	0	LDA	0	0	0	0	LDA
71	17	female	1	1	0	0	0	0	0	0	LDA	0.35	0.125	0.275	0.371652	LAR
75	21	female	0	1	0	0	0.25	0	0.25	0.25	LAR	0	0	0	0	LDA
66	41	female	1	1	1	1	0	0	0	0	LDA	0	0	0	0	LDA
80	17	female	1	1	0	0	0	0	0	0	LDA	0.5	0	0.5	0.5	LAR
77	16	male	0	0	0	0	0.2	0	-0.2	0.2	SML	0.7	0	-0.7	0.7	SML
65	9	female	1	1	0	0	0.35	0	-0.35	0.35	SML	0.05	1.5	-0.55	1.50083	SML
64	5	male	1	1	0	0	0	0	0	0	LDA	0	0	0	0	LDA
62	13	female	0	0	1	1	0	0	0	0	LDA	0	0	0	0	LDA
42	7	female	0	1	0	0	0	0	0	0	LDA	0.125	0.125	0.25	0.176777	LAR
48	5	female	1	1	0	0	0	0	0	0	LDA	0	0	0	0	LDA
55	18	female	1	1	0	0	0.25	0.166667	0.416667	0.300463	LAR	0	0.166667	0.166667	0.166667	EVN
73	33	female	0	0	1	1	0	0	0	0	LDA	0	0	0	0	LDA
59	12	male	1	1	0	0	0	0	0	0	LDA	0	0	0	0	LDA
61	17	male	1	1	0	0	0	0	0	0	LDA	0	0	0	0	LDA
62	16	female	1	1	0	0	0	0	0	0	LDA	0	0	0	0	LDA
63	17	female	0	0	0	0	0.1	0	-0.1	0.1	EVN	0.1	0	-0.1	0.1	EVN
53	12	female	1	1	0	0	0	0	0	0	LDA	0	0.25	0.25	0.25	LAR
81	19	female	1	1	1	1	0	0	0	0	LDA	0.125	0	0.125	0.125	EVN
65	16	female	1	1	0	0	0.1	0	-0.1	0.1	EVN	0.15	0	-0.15	0.15	EVN
72	22	female	0	0	1	1	0	0	0	0	LDA	0	0	0	0	LDA
73	16	female	1	1	0	0	0	0	0	0	LDA	0	0	0	0	LDA
52	16	male	0	0	0	0	0	0	0	0	LDA	0	0	0	0	LDA
82	14	female	1	1	0	0	0	0	0	0	LDA	0	0	0	0	LDA
68	17	female	1	1	0	0	0.125	0	0.125	0.125	EVN	0	0	0	0	LDA
74	16	female	0	0	0	0	0.25	0	0.25	0.25	LAR	0	0	0	0	LDA
65	16	female	1	1	0	0	0	0.125	0.125	0.125	EVN	0	0	0	0	LDA
50	14	female	1	1	0	0	0	0	0	0	LDA	0	0	0	0	LDA
71	25	female	1	1	0	0	0	0	0	0	LDA	0.225	0.166667	0.191667	0.280005	EVN
80	33	female	0	0	0	0	0.05	0.125	0.075	0.134629	EVN	0.375	0.125	0.5	0.395285	LAR
70	16	male	1	1	0	0	0	0	0	0	LDA	0	0	0	0	LDA
76	2	female	0	0	1	1	0.125	0	0.125	0.125	EVN	0.25	0	0.25	0.25	LAR
56	14	female	0	0	0	0	0.5	0	0.5	0.5	LAR	0.175	0	0.075	0.175	EVN
80	16	female	1	1	0	0	0	0	0	0	LDA	0	0	0	0	LDA
72	14	female	1	1	0	0	0.175	0	0.075	0.175	EVN	0	0	0	0	LDA
87	14	male	0	0	0	0	0	0	0	0	LDA	0	0	0	0	LDA
72	0	male	1	1	0	0	0.05	0	-0.05	0.05	LDA	0	0	0	0	LDA
79	22	male	0	1	0	0	1.1	0	-0.1	1.1	EVN	0	0	0	0	LDA
77	15	female	0	0	0	0	0	0	0	0	LDA	0	0	0	0	LDA
68	16	female	1	1	0	0	0	0	0	0	LDA	0	0	0	0	LDA
78	14	female	1	1	0	0	0	0.125	0.125	0.125	EVN	0	0.125	0.125	0.125	EVN
64	14	female	0	0	0	0	0.05	0	-0.05	0.05	LDA	0	0	0	0	LDA
49	14	female	0	0	0	0	0	0.166667	0.166667	0.166667	EVN	0	0	0	0	LDA
61	17	female	1	1	0	0	0.05	0	-0.05	0.05	LDA	0	0	0	0	LDA
66	14	female	1	1	0	0	0.65	0	-0.15	0.65	EVN	0.3	0	-0.3	0.3	SML
39	14	female	1	1	0	0	0.25	0.166667	-0.0833333	0.300463	EVN	0.2	0.366667	-0.233333	0.417665	SML
70	18	female	1	1	0	0	0.4	0	0.1	0.4	EVN	0.05	0	-0.05	0.05	LDA
55	16	female	1	1	0	0	0	0	0	0	LDA	0	0	0	0	LDA
44	35	female	0	0	0	0	0	0.166667	0.166667	0.166667	EVN	0	0.166667	0.166667	0.166667	EVN
74	18	female	1	1	0	0	0	0.291667	0.291667	0.291667	LAR	0	0	0	0	LDA
62	21	female	1	1	0	0	0.1	0	-0.1	0.1	EVN	0.05	0	-0.05	0.05	LDA
75	14	female	1	1	0	0	0	0	0	0	LDA	0	0	0	0	LDA
80	15	female	1	1	0	0	0.45	0.525	-0.225	0.691466	SML	0.525	0.3	-0.075	0.604669	EVN
57	18	male	1	0	0	0	0	0	0	0	LDA	0.05	0	-0.05	0.05	LDA
66	16	female	1	1	0	0	0	0	0	0	LDA	0	0	0	0	LDA
49	22	female	1	1	1	1	0.4	0.125	0.225	0.419076	LAR	0.75	0.125	0.375	0.760345	LAR
53	14	female	1	1	0	0	0.45	0	0.05	0.45	EVN	0.45	0	0.05	0.45	EVN
61	14	female	1	1	0	0	0.125	0	0.125	0.125	EVN	0.25	0	0.25	0.25	LAR
42	14	female	1	1	0	0	0	0.35	0.15	0.35	EVN	0	0.25	0.25	0.25	LAR
74	12	male	1	1	0	0	0	0	0	0	LDA	0	0	0	0	LDA
72	31	female	1	1	0	0	0.05	0	-0.05	0.05	LDA	0	0	0	0	LDA
70	21	female	1	1	0	0	0.05	0	-0.05	0.05	LDA	0	0	0	0	LDA
75	2	male	0	0	0	0	0	0	0	0	LDA	0	0	0	0	LDA
85	14	female	0	0	0	0	0	0	0	0	LDA	0	0	0	0	LDA
81	13	female	1	1	0	0	0	0	0	0	LDA	0	0	0	0	LDA
65	11	female	0	0	0	0	0	0	0	0	LDA	0	0	0	0	LDA
40	6	female	1	1	0	0	0.2	0	-0.2	0.2	SML	0	0	0	0	LDA
80	5	female	0	0	0	0	0.3	0	0.2	0.3	EVN	0.125	0	0.125	0.125	EVN
64	14	female	1	0	0	0	0.125	0.25	0.375	0.279508	LAR	0	0	0	0	LDA
72	14	female	1	1	0	0	0.1	0	-0.1	0.1	EVN	0	0	0	0	LDA
88	14	female	1	1	0	0	0	0	0	0	LDA	0	0	0	0	LDA
76	14	female	1	1	1	1	0	0	0	0	LDA	0	0	0	0	LDA
47	9	female	1	1	1	1	0.05	0.25	0.2	0.254951	EVN	0.05	0	-0.05	0.05	LDA
67	20	female	1	1	1	1	0.125	0	0.125	0.125	EVN	0.125	0	0.125	0.125	EVN
40	17	female	1	1	1	1	0.05	0	-0.05	0.05	LDA	0.05	0	-0.05	0.05	LDA
61	13	male	1	1	0	0	0	0	0	0	LDA	0	0	0	0	LDA
85	14	male	0	0	0	0	0	0	0	0	LDA	0.05	0	-0.05	0.05	LDA
78	35	female	1	1	0	0	0.2	0	-0.2	0.2	SML	0.3	0	-0.3	0.3	SML
80	1	female	1	1	0	0	0.25	0	0.25	0.25	LAR	0.25	0	0.25	0.25	LAR
60	4	male	1	1	0	0	0.05	0	-0.05	0.05	LDA	0	0	0	0	LDA
74	21	female	1	1	0	0	0	0	0	0	LDA	0	0	0	0	LDA
71	13	male	1	1	0	0	0.125	0	0.125	0.125	EVN	0.25	1	-0.75	1.03078	SML
53	28	female	1	1	0	0	0	0	0	0	LDA	0	0.125	0.125	0.125	EVN
64	4	male	1	1	0	0	0.65	0.25	0.1	0.696419	EVN	0	0.125	0.125	0.125	EVN
68	19	female	0	0	0	0	0	0	0	0	LDA	0	0	0	0	LDA
69	13	female	1	1	0	0	0	0	0	0	LDA	0	0	0	0	LDA
47	15	male	1	1	0	0	0	0	0	0	LDA	0	0	0	0	LDA
65	13	female	1	1	0	0	0	0.25	0.25	0.25	LAR	0	0	0	0	LDA
62	13	female	1	1	0	0	0.375	0	0.375	0.375	LAR	0	0	0	0	LDA
58	13	female	1	1	0	0	0	0	0	0	LDA	0.225	0.1	-0.075	0.246221	EVN
66	15	female	1	1	0	0	0.225	0	0.025	0.225	EVN	0	0.291667	0.291667	0.291667	LAR
70	14	female	0	0	0	0	0	0	0	0	LDA	0.15	0	-0.15	0.15	EVN
63	5	female	1	1	0	0	0	0	0	0	LDA	0	0	0	0	LDA
70	35	female	0	1	1	1	0.125	0	0.125	0.125	EVN	0	0	0	0	LDA
63	3	female	0	0	0	0	0	0	0	0	LDA	0	0	0	0	LDA
73	14	male	1	1	0	0	0	0	0	0	LDA	0	0	0	0	LDA
81	27	male	0	0	0	0	0.25	0	0.25	0.25	LAR	0.5	0	0.5	0.5	LAR
74	14	male	0	0	0	0	0.25	0	0.25	0.25	LAR	0	0	0	0	LDA
45	14	female	0	0	0	0	0	0	0	0	LDA	0.85	0	-0.35	0.85	SML
65	13	female	1	1	0	0	0	0	0	0	LDA	0	0	0	0	LDA
65	12	female	1	1	0	0	0	0	0	0	LDA	0	0	0	0	LDA
67	7	female	1	1	0	0	0.65	0	0.35	0.65	LAR	0	0	0	0	LDA
69	16	female	1	1	0	0	0	0	0	0	LDA	0	0	0	0	LDA
34	13	female	0	0	0	0	0	0	0	0	LDA	0	0	0	0	LDA
76	7	female	0	0	0	0	0.125	0	0.125	0.125	EVN	0.3	0	0.2	0.3	EVN
77	15	male	0	0	0	0	0.525	0.375	0.6	0.645174	LAR	1.25	0	0.25	1.25	LAR
51	15	female	1	1	1	1	0.125	0	0.125	0.125	EVN	0.35	0.25	0.4	0.430116	LAR
73	12	female	1	1	0	0	0	0	0	0	LDA	0.1	0	-0.1	0.1	EVN
43	13	female	1	1	0	0	0.125	0	0.125	0.125	EVN	0	0	0	0	LDA
66	42	female	1	1	0	0	0	0	0	0	LDA	0	0	0	0	LDA
57	13	female	1	1	0	0	0	0	0	0	LDA	0	0	0	0	LDA
65	13	female	0	0	1	1	0.25	0	0.25	0.25	LAR	0.575	0	0.175	0.575	EVN
72	19	male	0	0	0	0	0.125	0	0.125	0.125	EVN	0.125	0.291667	0.416667	0.317324	LAR
50	13	female	0	1	0	0	0.35	0	0.15	0.35	EVN	0.125	0	0.125	0.125	EVN
69	32	female	1	1	0	0	0	0	0	0	LDA	0	0	0	0	LDA
65	16	female	1	1	0	0	0.125	0	0.125	0.125	EVN	0.25	0	0.25	0.25	LAR
59	14	male	0	0	0	0	0	0	0	0	LDA	0	0	0	0	LDA
69	13	female	0	0	0	0	0.125	0	0.125	0.125	EVN	0.1	0	-0.1	0.1	EVN
68	12	female	0	0	1	1	0	0	0	0	LDA	0	0	0	0	LDA
53	15	female	1	1	0	0	0.7	0	-0.2	0.7	EVN	0.7	0	-0.2	0.7	EVN
52	13	female	1	1	0	0	0	0	0	0	LDA	0.25	0	0.25	0.25	LAR
64	15	female	1	1	0	0	0.125	0.1	0.025	0.160078	EVN	0.775	0.9	0.075	1.1877	EVN
56	13	female	1	1	0	0	0.25	0.166667	0.416667	0.300463	LAR	0.25	0.125	0.375	0.279508	LAR
66	12	female	0	1	0	0	1.225	0.1	-0.075	1.22907	EVN	0.5	0.266667	0.0666667	0.566667	EVN
68	12	female	1	1	0	0	0	0	0	0	LDA	0	0	0	0	LDA
35	13	female	1	1	0	0	0	0	0	0	LDA	0	0	0	0	LDA
43	13	female	0	0	1	1	0.25	0	0.25	0.25	LAR	0.175	0	0.075	0.175	EVN
48	12	male	1	1	0	0	0.125	0	0.125	0.125	EVN	0	0	0	0	LDA
46	3	male	0	0	0	0	0.125	0	0.125	0.125	EVN	0	0	0	0	LDA
68	18	female	1	1	0	0	0.25	0	0.25	0.25	LAR	0.125	0	0.125	0.125	EVN
78	15	female	1	1	0	0	0.125	0	0.125	0.125	EVN	0	0	0	0	LDA
68	13	female	1	1	0	0	0	0	0	0	LDA	0.1	0	-0.1	0.1	EVN
70	12	female	1	1	0	0	0	0	0	0	LDA	0	0	0	0	LDA
81	12	female	0	0	0	0	0.175	0	0.075	0.175	EVN	0.175	0	0.075	0.175	EVN
52	13	female	0	0	1	1	0	0	0	0	LDA	0	0	0	0	LDA
74	13	female	1	1	0	0	0.475	0	-0.225	0.475	SML	0.225	0	0.025	0.225	EVN
67	12	female	1	1	0	0	0	0	0	0	LDA	0	0	0	0	LDA
74	9	female	0	0	1	1	0.7	0	0.3	0.7	LAR	0.25	0	0.25	0.25	LAR
66	12	male	1	1	0	0	0.6	0	-0.1	0.6	EVN	0.25	0	0.25	0.25	LAR
71	27	female	0	0	0	0	0.5	0.125	-0.375	0.515388	SML	0	0	0	0	LDA
79	19	female	0	0	0	0	0	0	0	0	LDA	0	0.25	0.25	0.25	LAR
76	14	female	1	1	0	0	0	0	0	0	LDA	0	0	0	0	LDA
51	7	female	1	1	0	0	0.05	0	-0.05	0.05	LDA	0	0	0	0	LDA
62	17	female	1	1	0	0	0.3	0	0.2	0.3	EVN	0.25	0.125	0.375	0.279508	LAR
86	14	female	1	1	0	0	0	0	0	0	LDA	0	0	0	0	LDA
66	18	female	0	0	0	0	0	0	0	0	LDA	0	0	0	0	LDA
56	7	female	0	0	0	0	0	0	0	0	LDA	0	0	0	0	LDA
86	15	female	1	1	0	0	0.125	0	0.125	0.125	EVN	0	0	0	0	LDA
77	14	female	0	0	0	0	0	0	0	0	LDA	0.3	0	0.2	0.3	EVN
80	12	female	0	0	1	1	0	0	0	0	LDA	0	0	0	0	LDA
39	14	female	1	1	0	0	0.125	0	0.125	0.125	EVN	0.175	0	0.075	0.175	EVN
57	21	female	1	1	0	0	0.05	0	-0.05	0.05	LDA	0	0	0	0	LDA
63	14	female	1	1	0	0	0	0.291667	0.291667	0.291667	LAR	0.1	0.291667	0.191667	0.308333	EVN
67	20	female	1	1	0	0	0.4	0.708333	0.808333	0.813472	LAR	0.4	0.708333	0.808333	0.813472	LAR
75	12	female	1	1	0	0	0	0	0	0	LDA	0.05	0	-0.05	0.05	LDA
64	23	female	1	1	0	0	0.25	0	0.25	0.25	LAR	0.125	0	0.125	0.125	EVN
68	22	female	1	1	0	0	0	0	0	0	LDA	0.05	0	-0.05	0.05	LDA
65	12	female	1	1	0	0	0	0	0	0	LDA	0	0	0	0	LDA
55	13	female	1	1	1	1	0	0	0	0	LDA	0.125	0.125	0.25	0.176777	LAR
62	13	female	1	1	0	0	0.25	0.125	0.375	0.279508	LAR	0.125	0	0.125	0.125	EVN
81	12	female	0	0	0	0	0.65	0	0.35	0.65	LAR	0.375	0	0.375	0.375	LAR
54	19	female	1	1	0	0	0.15	0	-0.15	0.15	EVN	0.5	0.583333	0.0833333	0.768295	EVN
66	12	male	1	1	0	0	0	0	0	0	LDA	0	0	0	0	LDA
59	12	female	0	0	0	0	0	0.2	-0.2	0.2	SML	0	0	0	0	LDA
74	12	female	1	1	0	0	0	0	0	0	LDA	0	0	0	0	LDA
61	12	female	1	1	0	0	0	0	0	0	LDA	0	0	0	0	LDA
66	12	female	1	1	0	0	0.25	0	0.25	0.25	LAR	0	0.291667	0.291667	0.291667	LAR
48	3	female	1	1	0	0	0.05	0	-0.05	0.05	LDA	0.1	0	-0.1	0.1	EVN
57	8	female	1	1	0	0	0	0	0	0	LDA	0	0	0	0	LDA
78	21	female	0	0	0	0	0.4	1.25	-1.15	1.31244	SML	0	1	-1	1	SML
51	6	female	1	1	0	0	0	0	0	0	LDA	0.2	0	-0.2	0.2	SML
77	13	female	0	0	1	1	0	0	0	0	LDA	0	0.125	0.125	0.125	EVN
77	15	female	0	0	0	0	0.125	0	0.125	0.125	EVN	0	0	0	0	LDA
58	12	female	1	1	0	0	0.25	0	0.25	0.25	LAR	0.25	0	0.25	0.25	LAR
59	5	female	0	0	0	0	0	0	0	0	LDA	0	0	0	0	LDA
30	12	male	0	0	1	1	0	0	0	0	LDA	0	0	0	0	LDA
73	13	female	1	1	0	0	0	0	0	0	LDA	0	0	0	0	LDA
75	12	female	1	1	0	0	0.45	0.25	0.3	0.514782	LAR	0	0.125	0.125	0.125	EVN
37	19	female	1	1	1	1	0.625	0	0.125	0.625	EVN	1.15	0.125	-0.025	1.15677	EVN
49	14	female	0	0	0	0	0	0	0	0	LDA	0	0	0	0	LDA
51	18	male	1	1	0	0	0.125	0	0.125	0.125	EVN	0.125	0	0.125	0.125	EVN
56	13	male	0	0	0	0	0	0	0	0	LDA	0	0	0	0	LDA
65	13	male	1	1	0	0	0.25	0.25	0.5	0.353553	LAR	0	0	0	0	LDA
66	15	female	1	1	0	0	0	0	0	0	LDA	0	0	0	0	LDA
74	41	female	1	1	0	0	0	0	0	0	LDA	0	0	0	0	LDA
59	0	female	1	1	0	0	0	0	0	0	LDA	0	0	0	0	LDA
70	19	female	1	0	0	0	0	0	0	0	LDA	0	0	0	0	LDA
67	17	female	1	1	1	1	0	0	0	0	LDA	0	0	0	0	LDA
69	12	female	1	1	0	0	0.4	0	-0.4	0.4	SML	0.225	0.125	0.15	0.257391	EVN
67	27	female	1	1	0	0	0	0	0	0	LDA	0	0	0	0	LDA
39	13	female	0	0	0	0	0	0	0	0	LDA	0	0	0	0	LDA
70	12	female	0	0	1	0	0.45	0	0.05	0.45	EVN	0	0	0	0	LDA
75	9	male	1	1	0	0	0	0	0	0	LDA	0	0	0	0	LDA
68	12	female	0	0	0	0	0	0.25	0.25	0.25	LAR	0	0	0	0	LDA
67	12	male	1	1	0	0	0	0	0	0	LDA	0	0	0	0	LDA
76	23	female	1	1	0	0	0	0.125	0.125	0.125	EVN	0	0.375	0.375	0.375	LAR
35	12	female	0	0	1	1	0	0	0	0	LDA	0	0.25	0.25	0.25	LAR
64	0	female	1	1	0	0	0.3	0.166667	0.366667	0.343188	LAR	0	0	0	0	LDA
61	18	male	0	0	0	0	0	0	0	0	LDA	0	0	0	0	LDA
72	33	male	1	1	1	1	0.375	0	0.375	0.375	LAR	0.625	0.125	0.75	0.637377	LAR
59	18	female	1	1	1	1	0.125	0.291667	0.416667	0.317324	LAR	0.125	0.25	0.375	0.279508	LAR
74	14	female	1	1	0	0	0	0	0	0	LDA	0	0	0	0	LDA
73	10	female	1	0	0	0	0	0	0	0	LDA	0	0	0	0	LDA
76	29	male	1	1	0	0	0	0.125	0.125	0.125	EVN	0	0.125	0.125	0.125	EVN
71	21	male	1	1	0	0	0.25	0	0.25	0.25	LAR	0	0	0	0	LDA
63	28	female	0	0	1	1	0.125	0	0.125	0.125	EVN	0.325	0	-0.075	0.325	EVN
79	13	male	0	0	0	0	0.25	0	0.25	0.25	LAR	0	0	0	0	LDA
83	3	male	0	0	0	0	0.125	0	0.125	0.125	EVN	0	0	0	0	LDA
73	12	female	0	0	0	0	0	0	0	0	LDA	0	0	0	0	LDA
61	15	female	0	0	0	0	0.125	0	0.125	0.125	EVN	0.125	0	0.125	0.125	EVN
49	12	female	1	1	0	0	0	0	0	0	LDA	0.125	0	0.125	0.125	EVN
67	22	female	1	1	0	0	0.225	0.25	0.275	0.336341	LAR	0	0	0	0	LDA
63	16	female	1	1	0	0	0	0	0	0	LDA	0	0	0	0	LDA
74	16	female	1	1	0	0	0	0	0	0	LDA	0	0	0	0	LDA
57	27	female	1	1	0	0	0.375	0	0.375	0.375	LAR	0.15	0.2	-0.35	0.25	SML
68	12	female	1	1	0	0	0	0	0	0	LDA	0	0	0	0	LDA
73	12	female	1	1	0	0	0.25	0.125	0.375	0.279508	LAR	0.9	0.833333	0.933333	1.22656	LAR
75	8	male	0	0	0	0	0.25	0	0.25	0.25	LAR	0.125	0	0.125	0.125	EVN
47	26	female	0	0	0	0	0.25	0.166667	0.416667	0.300463	LAR	0	0	0	0	LDA
69	24	female	1	1	0	0	0.45	0.291667	-0.158333	0.536255	EVN	0.225	0.125	0.15	0.257391	EVN
76	18	female	1	1	0	0	0	0	0	0	LDA	0	0	0	0	LDA
48	14	female	1	1	0	0	0	0.125	0.125	0.125	EVN	0	0.25	0.25	0.25	LAR
68	12	female	1	1	0	0	0.3	0	0.2	0.3	EVN	0.25	0	0.25	0.25	LAR
78	20	female	1	1	0	0	0	0	0	0	LDA	0.175	0	0.075	0.175	EVN
57	11	female	1	1	0	0	0	0	0	0	LDA	0	0	0	0	LDA
74	13	female	0	0	0	0	0.25	0.225	0.275	0.336341	LAR	1.8	0	0.2	1.8	EVN
71	11	female	0	0	1	1	0	0	0	0	LDA	0	0	0	0	LDA
84	11	male	0	0	0	0	0	0	0	0	LDA	0.1	0	-0.1	0.1	EVN
76	12	male	1	1	0	0	0	0	0	0	LDA	0	0	0	0	LDA
62	1	female	1	1	0	0	0	0	0	0	LDA	0	0	0	0	LDA
76	11	female	0	1	0	0	0.25	0.833333	1.08333	0.870026	LAR	0	0.5	0.5	0.5	LAR
81	11	female	0	0	0	0	0.4	0.225	0.125	0.458939	EVN	0.75	0.9	-0.15	1.17154	EVN
31	13	female	0	0	0	0	0	0	0	0	LDA	0	0	0	0	LDA
52	26	female	1	1	0	0	0	0	0	0	LDA	0	0	0	0	LDA
67	11	female	1	1	1	1	0	0.25	0.25	0.25	LAR	0	0	0	0	LDA
74	33	female	0	0	0	0	0	0	0	0	LDA	0	0	0	0	LDA
59	11	female	1	1	1	1	0	0	0	0	LDA	0	0	0	0	LDA
60	6	female	1	1	1	1	0	0	0	0	LDA	0	0	0	0	LDA
65	0	female	0	1	0	0	0.45	0	0.05	0.45	EVN	0	0	0	0	LDA
59	39	female	0	0	0	0	0.25	0	0.25	0.25	LAR	0.25	0	0.25	0.25	LAR
85	11	female	1	1	0	0	0	0	0	0	LDA	0	0	0	0	LDA
52	11	female	0	0	0	0	0	0	0	0	LDA	0	0	0	0	LDA
42	24	female	1	1	0	0	0	0	0	0	LDA	0	0	0	0	LDA
76	2	female	1	0	0	0	0	0	0	0	LDA	0	0.333333	0.333333	0.333333	LAR
49	11	female	1	1	0	0	0	0.25	0.25	0.25	LAR	0	0.25	0.25	0.25	LAR
71	17	male	0	0	0	0	0	0	0	0	LDA	0	0	0	0	LDA
51	11	female	1	1	0	0	0	0.2	-0.2	0.2	SML	0	0.2	-0.2	0.2	SML
66	30	female	1	1	1	1	0	0	0	0	LDA	0	0	0	0	LDA
68	12	female	1	1	0	0	0	0	0	0	LDA	0	0	0	0	LDA
97	11	female	0	0	0	0	0	0	0	0	LDA	0	0	0	0	LDA
73	12	female	1	1	0	0	0	0	0	0	LDA	0	0	0	0	LDA
57	13	female	0	1	0	0	0	0	0	0	LDA	0.125	0	0.125	0.125	EVN
67	14	female	0	0	0	0	0	0	0	0	LDA	0	0	0	0	LDA
67	15	female	1	1	1	1	0.125	0	0.125	0.125	EVN	0.125	0	0.125	0.125	EVN
62	14	female	0	0	0	0	0.125	0	0.125	0.125	EVN	0	0	0	0	LDA
70	16	female	0	0	0	0	0	0	0	0	LDA	0	0	0	0	LDA
63	12	female	1	1	0	0	0	0	0	0	LDA	0	0	0	0	LDA
53	10	female	0	0	0	0	0	0	0	0	LDA	0	0	0	0	LDA
83	25	female	1	1	0	0	0.125	0.333333	0.458333	0.356	LAR	0	0	0	0	LDA
83	11	male	1	1	0	0	0.175	0	0.075	0.175	EVN	0	0	0	0	LDA
74	6	male	0	0	0	0	0	0.125	0.125	0.125	EVN	0	0	0	0	LDA
59	11	female	1	1	0	0	0	0	0	0	LDA	0	0	0	0	LDA
85	11	female	1	1	0	0	0	0	0	0	LDA	0	0	0	0	LDA
65	26	male	1	1	1	1	0	0	0	0	LDA	0	0	0	0	LDA
71	10	male	1	1	0	0	0.125	0	0.125	0.125	EVN	0.25	0	0.25	0.25	LAR
51	11	male	0	0	0	0	0.5	0.3	-0.3	0.583095	SML	0.375	0	0.375	0.375	LAR
50	3	female	1	1	0	0	0	1	-1	1	SML	0	0.5	-0.5	0.5	SML
51	2	female	1	1	0	0	0	0.125	0.125	0.125	EVN	0.125	0	0.125	0.125	EVN
68	11	male	0	0	0	0	0	0	0	0	LDA	0	0	0	0	LDA
71	11	female	1	1	0	0	0.05	0	-0.05	0.05	LDA	0.25	0	0.25	0.25	LAR
69	11	female	1	1	0	0	0	0.125	0.125	0.125	EVN	0	0	0	0	LDA
42	16	female	1	1	0	0	0.25	0	-0.25	0.25	SML	0.1	0	-0.1	0.1	EVN
62	19	female	1	1	0	0	0.125	0	0.125	0.125	EVN	0.125	0	0.125	0.125	EVN
75	40	male	0	0	0	0	0	0	0	0	LDA	0	0.125	0.125	0.125	EVN
46	20	female	1	1	0	0	0.125	0.375	0.5	0.395285	LAR	0	0	0	0	LDA
58	10	female	0	0	0	0	0	0	0	0	LDA	0	0	0	0	LDA
35	14	male	0	0	0	0	0	0.125	0.125	0.125	EVN	0.25	0.125	0.375	0.279508	LAR
66	11	female	1	1	0	0	0.35	0.25	0.4	0.430116	LAR	0.325	0	-0.075	0.325	EVN
70	10	male	0	0	1	1	0	0.125	0.125	0.125	EVN	0	0	0	0	LDA
68	11	female	0	0	0	0	0.25	0.25	0.5	0.353553	LAR	0	0.25	0.25	0.25	LAR
65	3	male	1	1	0	0	0.2	0	-0.2	0.2	SML	0.05	0	-0.05	0.05	LDA
71	18	female	1	1	0	0	0	0.25	0.25	0.25	LAR	0.4	0	-0.4	0.4	SML
74	11	female	1	1	0	0	0	0	0	0	LDA	0	0	0	0	LDA
63	15	female	0	0	0	0	0	0	0	0	LDA	0.25	0	0.25	0.25	LAR
56	13	female	0	0	0	0	0	0	0	0	LDA	0	0	0	0	LDA
68	11	female	1	1	0	0	0	0	0	0	LDA	0.1	0	-0.1	0.1	EVN
69	9	female	1	1	0	0	1.35	1.25	-1.1	1.83984	SML	1.725	0	-0.475	1.725	SML
77	10	female	0	0	0	0	0	0.125	0.125	0.125	EVN	1.1	0.25	0.15	1.12805	EVN
40	25	female	1	1	0	0	0.425	0	-0.175	0.425	EVN	0.275	0	-0.025	0.275	EVN
71	55	female	1	1	0	0	0.25	0	0.25	0.25	LAR	0	0	0	0	LDA
74	10	male	0	0	0	0	0	0	0	0	LDA	0	0	0	0	LDA
38	19	female	0	0	1	0	0.475	0.166667	-0.0583333	0.503391	EVN	0	0	0	0	LDA
52	11	male	0	0	0	0	0	0	0	0	LDA	0	0.3	-0.3	0.3	SML
67	12	female	1	1	0	0	0.375	0	0.375	0.375	LAR	0.6	0.125	0.525	0.612883	LAR
69	10	female	1	1	0	0	0.4	0	-0.4	0.4	SML	0.2	0	-0.2	0.2	SML
65	10	female	1	1	0	0	0	0	0	0	LDA	0.55	0	0.45	0.55	LAR
92	10	female	0	0	0	0	0	0	0	0	LDA	0	0	0	0	LDA
71	10	male	1	1	0	0	0	0	0	0	LDA	0	0	0	0	LDA
80	10	female	0	0	0	0	0	0	0	0	LDA	0	0	0	0	LDA
78	11	female	0	0	0	0	0	0	0	0	LDA	0	0	0	0	LDA
51	10	female	1	1	0	0	0.1	0.125	0.025	0.160078	EVN	0	0.125	0.125	0.125	EVN
65	15	female	1	1	0	0	0	0	0	0	LDA	0	0	0	0	LDA
60	6	male	1	1	0	0	0.05	0	-0.05	0.05	LDA	0.425	0	-0.175	0.425	EVN
81	14	female	0	0	0	0	0.125	0	0.125	0.125	EVN	0.4	0	0.1	0.4	EVN
55	10	female	1	1	0	0	0.125	0	0.125	0.125	EVN	0.25	0	0.25	0.25	LAR
79	10	female	0	0	0	0	0.25	0	0.25	0.25	LAR	0.375	0	0.375	0.375	LAR
54	0	female	1	0	0	0	0.8	0.1	0.1	0.806226	EVN	0.25	0	0.25	0.25	LAR
79	45	female	1	1	0	0	0.125	0	0.125	0.125	EVN	0	0	0	0	LDA
75	0	male	0	1	0	0	0.35	0	0.15	0.35	EVN	0.1	0	-0.1	0.1	EVN
67	16	female	0	0	0	0	0	0	0	0	LDA	0	0	0	0	LDA
74	10	male	0	0	1	1	0	0	0	0	LDA	0.125	0	0.125	0.125	EVN
70	11	female	1	1	0	0	0	0	0	0	LDA	0.05	0	-0.05	0.05	LDA
76	11	female	1	1	1	1	0	0	0	0	LDA	0	0	0	0	LDA
48	13	female	1	1	0	0	0.3	0.491667	0.291667	0.575965	LAR	0	0	0	0	LDA
67	16	female	1	1	0	0	0	0	0	0	LDA	0	0	0	0	LDA
76	6	female	0	0	0	0	0.425	0	-0.175	0.425	EVN	0	0	0	0	LDA
78	2	female	1	1	1	1	0	0	0	0	LDA	0	0	0	0	LDA
70	20	female	0	0	1	1	0	0	0	0	LDA	0	0	0	0	LDA
68	10	female	1	1	0	0	0	0	0	0	LDA	0	0	0	0	LDA
69	10	female	1	1	0	0	0	0	0	0	LDA	0	0	0	0	LDA
75	6	female	0	0	0	0	0	0	0	0	LDA	0.125	0	0.125	0.125	EVN
82	10	female	1	1	0	0	0	0	0	0	LDA	0	0	0	0	LDA
66	11	female	1	1	0	0	0.4	0	-0.4	0.4	SML	0	0	0	0	LDA
60	11	female	0	0	0	0	0.25	0	0.25	0.25	LAR	0	0	0	0	LDA
62	11	male	1	1	0	0	0	0	0	0	LDA	0	0	0	0	LDA
63	19	female	0	0	0	0	0	0.125	0.125	0.125	EVN	0.05	0.125	0.075	0.134629	EVN
55	10	female	1	1	0	0	0.375	0.25	0.625	0.450694	LAR	0.5	0	0.5	0.5	LAR
68	10	female	1	1	0	0	0.125	0	0.125	0.125	EVN	0	0	0	0	LDA
71	3	female	0	0	0	0	0.05	0	-0.05	0.05	LDA	0	0	0	0	LDA
62	10	male	1	1	0	0	0.125	0	0.125	0.125	EVN	0	0	0	0	LDA
68	22	male	1	1	0	0	0	0	0	0	LDA	0	0	0	0	LDA
65	12	female	1	1	0	0	0.15	0	-0.15	0.15	EVN	0.15	0	-0.15	0.15	EVN
72	11	female	1	1	1	1	0.15	0	-0.15	0.15	EVN	0.15	0	-0.15	0.15	EVN
40	10	male	1	1	0	0	0.2	0	-0.2	0.2	SML	0	0	0	0	LDA
34	13	female	1	1	0	0	0.15	0	-0.15	0.15	EVN	0	0.125	0.125	0.125	EVN
47	10	female	1	1	1	1	0	0	0	0	LDA	0	0	0	0	LDA
78	9	female	0	0	0	0	0	0	0	0	LDA	0	0	0	0	LDA
68	13	female	1	1	0	1	0.55	0.3	0.15	0.626498	EVN	0	0.1	-0.1	0.1	EVN
78	44	female	0	0	0	0	0	0.125	0.125	0.125	EVN	0.25	0	0.25	0.25	LAR
52	23	female	0	0	0	0	0	0	0	0	LDA	0.85	0	-0.35	0.85	SML
46	10	female	1	1	0	0	0.125	0	0.125	0.125	EVN	0	0	0	0	LDA
56	9	female	0	0	0	0	0	0	0	0	LDA	0	0	0	0	LDA
55	6	female	1	1	0	0	0.1	0	-0.1	0.1	EVN	0.05	0	-0.05	0.05	LDA
44	9	female	1	1	0	0	0	0	0	0	LDA	0.25	0	0.25	0.25	LAR
33	10	female	0	0	1	1	0.6	0.125	0.525	0.612883	LAR	0	0	0	0	LDA
41	10	female	1	0	1	0	0	0	0	0	LDA	0	0	0	0	LDA
66	9	female	1	1	1	1	0	0	0	0	LDA	0	0	0	0	LDA
81	5	male	0	0	0	0	0	0	0	0	LDA	0	0	0	0	LDA
68	10	female	0	0	1	1	0.3	0	-0.3	0.3	SML	0.3	0	-0.3	0.3	SML
53	9	female	1	1	0	0	0	0.25	0.25	0.25	LAR	0	0	0	0	LDA
79	14	female	0	0	0	0	0.25	0	0.25	0.25	LAR	0	0	0	0	LDA
68	12	female	0	0	0	0	0.5	0	0.5	0.5	LAR	0.25	0	0.25	0.25	LAR
74	22	female	0	0	1	1	0.55	0.25	0.2	0.604152	EVN	0	0	0	0	LDA
81	9	male	0	0	0	0	0	0	0	0	LDA	0	0	0	0	LDA
65	10	female	1	1	1	1	0	0.125	0.125	0.125	EVN	0	0	0	0	LDA
54	2	male	1	1	0	0	0	0.2	-0.2	0.2	SML	0.325	0	-0.075	0.325	EVN
62	13	female	1	1	1	1	0.1	0	-0.1	0.1	EVN	0.35	0.291667	0.441667	0.455598	LAR
37	9	female	0	0	0	0	0	0	0	0	LDA	0.25	0	0.25	0.25	LAR
71	9	male	1	1	0	0	0	0	0	0	LDA	0	0.125	0.125	0.125	EVN
79	10	male	1	1	0	0	0	0	0	0	LDA	0	0	0	0	LDA
75	10	male	1	1	0	0	0.125	0	0.125	0.125	EVN	0	0	0	0	LDA
51	9	female	1	1	0	0	0	0	0	0	LDA	0	0	0	0	LDA
66	1	male	1	1	0	0	0	0	0	0	LDA	0	0	0	0	LDA
56	5	female	0	0	0	0	0	0	0	0	LDA	0.125	0	0.125	0.125	EVN
73	0	female	1	1	0	0	0	0	0	0	LDA	0	0	0	0	LDA
68	9	female	1	1	0	0	0	0	0	0	LDA	0.5	0	0.5	0.5	LAR
72	19	female	1	1	0	0	0.4	0	0.1	0.4	EVN	0.4	0	0.1	0.4	EVN
64	21	female	1	1	0	0	0	0	0	0	LDA	0	0.291667	0.291667	0.291667	LAR
77	10	female	0	0	0	0	0.3	0	0.2	0.3	EVN	0.125	0.4	-0.275	0.419076	SML
73	9	female	1	1	1	0	0.85	0	0.65	0.85	LAR	0.25	0	0.25	0.25	LAR
78	10	male	0	0	0	0	0	0	0	0	LDA	0	0	0	0	LDA
62	9	female	1	1	0	0	0	0	0	0	LDA	0	0	0	0	LDA
76	9	female	1	1	1	1	0	0	0	0	LDA	0	0	0	0	LDA
72	9	female	0	0	1	1	0	0	0	0	LDA	0	0	0	0	LDA
57	9	male	1	1	0	0	0	0	0	0	LDA	0	0	0	0	LDA
65	17	female	0	0	1	1	0.3	0.375	0.575	0.480234	LAR	0.25	0.125	0.375	0.279508	LAR
51	9	male	1	1	1	1	0	0	0	0	LDA	0	0	0	0	LDA
40	9	female	1	1	0	0	0.05	0	-0.05	0.05	LDA	0	0	0	0	LDA
65	9	male	0	0	0	0	0	0	0	0	LDA	0	0	0	0	LDA
61	26	female	1	1	0	0	0.05	0	-0.05	0.05	LDA	0	0	0	0	LDA
68	9	female	1	1	0	0	0.05	0	-0.05	0.05	LDA	0.1	0.35	0.05	0.364005	EVN
73	9	female	0	0	0	0	0	0	0	0	LDA	0	0	0	0	LDA
29	11	female	1	1	0	0	0	0.4	-0.4	0.4	SML	0	0.1	-0.1	0.1	EVN
72	11	female	0	0	0	0	0	0	0	0	LDA	0	0	0	0	LDA
46	9	female	0	0	0	0	0.25	0	-0.25	0.25	SML	0	0	0	0	LDA
80	1	female	0	0	0	0	0	0	0	0	LDA	0	0	0	0	LDA
80	37	female	1	1	0	0	0	0	0	0	LDA	0	0	0	0	LDA
65	1	female	0	0	0	0	0.1	0	-0.1	0.1	EVN	0.2	0	-0.2	0.2	SML
68	2	male	1	1	0	0	0.1	0	-0.1	0.1	EVN	0	0	0	0	LDA
73	0	female	0	1	0	0	0.5	0.125	0.125	0.515388	EVN	0.15	0	-0.15	0.15	EVN
71	9	male	0	0	0	0	0	0	0	0	LDA	0	0	0	0	LDA
68	8	male	1	1	0	0	0	0	0	0	LDA	0	0	0	0	LDA
63	29	male	1	1	0	0	0.125	0	0.125	0.125	EVN	0	0	0	0	LDA
76	11	male	1	1	0	0	0.125	0	0.125	0.125	EVN	0	0	0	0	LDA
48	9	female	1	1	0	0	0	0	0	0	LDA	0.125	0.125	0.25	0.176777	LAR
67	9	male	0	0	0	0	0.5	0.125	0.625	0.515388	LAR	0.125	0	0.125	0.125	EVN
69	8	female	1	1	1	1	0	0	0	0	LDA	0	0	0	0	LDA
76	10	male	1	1	0	0	0	0	0	0	LDA	0	0	0	0	LDA
67	8	female	1	1	0	0	0	0	0	0	LDA	0	0	0	0	LDA
62	10	female	1	1	1	1	0.925	0	-0.675	0.925	SML	0.05	0	-0.05	0.05	LDA
28	8	female	0	0	1	0	0.125	0	0.125	0.125	EVN	0	0.291667	0.291667	0.291667	LAR
67	10	female	1	1	0	0	0	0	0	0	LDA	0	0	0	0	LDA
60	8	male	1	1	0	0	0	0	0	0	LDA	0	0	0	0	LDA
72	10	female	1	1	0	0	0	0	0	0	LDA	0	0	0	0	LDA
66	8	female	1	1	1	1	0.1	0.1	-0.2	0.141421	SML	0.35	0	0.15	0.35	EVN
74	9	female	1	1	0	0	0.05	0	-0.05	0.05	LDA	0	0	0	0	LDA
60	19	male	1	1	1	1	0	0	0	0	LDA	0	0	0	0	LDA
48	8	male	1	1	0	0	0.175	0.25	0.325	0.305164	LAR	0.15	0.125	-0.025	0.195256	EVN
68	3	female	1	1	0	0	0	0	0	0	LDA	0	0	0	0	LDA
24	8	female	0	0	1	1	0	0	0	0	LDA	0	0	0	0	LDA
71	8	female	1	1	0	0	0.25	0	0.25	0.25	LAR	0.125	0	0.125	0.125	EVN
75	9	female	1	1	0	0	0.1	0	-0.1	0.1	EVN	0.1	0.6	-0.7	0.608276	SML
42	15	female	0	0	1	1	0.1	0	-0.1	0.1	EVN	0.225	0	0.025	0.225	EVN
59	8	male	0	0	1	1	0.125	0.25	0.375	0.279508	LAR	0	0	0	0	LDA
43	18	female	0	1	0	0	0	0	0	0	LDA	0	0.25	0.25	0.25	LAR
76	9	male	0	0	0	0	0	0	0	0	LDA	0	0	0	0	LDA
68	8	female	0	0	0	0	0	0	0	0	LDA	0.4	0.125	0.225	0.419076	LAR
66	13	female	1	1	0	0	0	1.19167	-0.608333	1.19167	SML	0.3	0.9	-1.2	0.948683	SML
66	1	female	1	1	0	0	0	0	0	0	LDA	0.75	0	-0.75	0.75	SML
74	13	male	0	0	0	1	0.25	0	0.25	0.25	LAR	0	0	0	0	LDA
75	17	female	0	0	1	1	0	0.25	0.25	0.25	LAR	0	0.25	0.25	0.25	LAR
66	8	male	0	0	0	0	0	0	0	0	LDA	0	0	0	0	LDA
65	9	male	1	1	0	0	0	0	0	0	LDA	0	0	0	0	LDA
86	35	female	0	0	0	0	0	0	0	0	LDA	0	0.125	0.125	0.125	EVN
73	33	male	1	1	0	0	0.25	0	0.25	0.25	LAR	0	0	0	0	LDA
72	43	female	1	1	0	0	0.2	0	-0.2	0.2	SML	0.2	0.166667	-0.0333333	0.260342	EVN
86	7	female	1	1	0	0	0.25	0	0.25	0.25	LAR	0.2	0	-0.2	0.2	SML
48	10	female	1	1	0	0	0.05	0	-0.05	0.05	LDA	0.05	0	-0.05	0.05	LDA
57	8	female	1	1	0	0	0	0	0	0	LDA	0	0	0	0	LDA
57	8	female	1	1	0	0	0	0	0	0	LDA	0	0	0	0	LDA
78	8	male	1	1	0	0	0	0	0	0	LDA	0	0	0	0	LDA
54	12	female	1	1	0	0	0.2	0	-0.2	0.2	SML	0.05	0	-0.05	0.05	LDA
79	17	female	1	1	0	0	0	0	0	0	LDA	0	0	0	0	LDA
46	8	female	1	1	1	1	0.25	0	0.25	0.25	LAR	0.35	0	0.15	0.35	EVN
88	5	female	0	0	0	0	0.5	0	0.5	0.5	LAR	0	0	0	0	LDA
65	15	female	1	1	0	0	0.225	0	0.025	0.225	EVN	0	0	0	0	LDA
64	8	female	1	1	0	0	0	0	0	0	LDA	0	0	0	0	LDA
65	8	female	1	1	0	0	0.05	0	-0.05	0.05	LDA	0	0	0	0	LDA
65	8	male	1	1	0	0	0	0	0	0	LDA	0	0	0	0	LDA
32	8	female	0	0	1	1	0	0	0	0	LDA	0	0	0	0	LDA
68	8	female	1	1	0	0	0.125	0	0.125	0.125	EVN	0	0	0	0	LDA
22	8	female	0	0	1	1	0	0	0	0	LDA	0	0	0	0	LDA
73	13	female	1	1	0	0	0	0	0	0	LDA	0	0	0	0	LDA
85	8	female	0	0	0	0	0	0	0	0	LDA	0.5	0	0	0.5	EVN
77	8	female	1	1	0	0	0	0	0	0	LDA	0	0	0	0	LDA
59	8	female	1	1	0	0	0.25	0.166667	0.416667	0.300463	LAR	0.25	0.166667	0.416667	0.300463	LAR
50	8	female	0	0	1	1	0.125	0	0.125	0.125	EVN	0.125	0	0.125	0.125	EVN
52	8	female	1	1	1	1	0	2.79167	-1.20833	2.79167	SML	0.05	0	-0.05	0.05	LDA
72	17	female	1	1	0	0	0	0.25	0.25	0.25	LAR	0	0.25	0.25	0.25	LAR
63	10	male	0	0	0	0	0.25	0	0.25	0.25	LAR	0	0	0	0	LDA
41	8	female	1	1	0	0	0	0	0	0	LDA	0	0	0	0	LDA
44	8	female	1	1	0	0	0	0	0	0	LDA	0.5	0	-7.45058e-09	0.5	EVN
68	8	female	1	1	0	0	0	0	0	0	LDA	0	0	0	0	LDA
64	7	male	1	1	0	0	0	0.291667	0.291667	0.291667	LAR	0.1	0	-0.1	0.1	EVN
67	7	female	1	1	0	0	0	0	0	0	LDA	0	0	0	0	LDA
56	8	female	1	1	0	0	0	0	0	0	LDA	0	0	0	0	LDA
78	10	female	0	0	0	0	0	0	0	0	LDA	0	0	0	0	LDA
59	9	female	1	1	0	1	0.25	0	0.25	0.25	LAR	0.25	0	0.25	0.25	LAR
78	27	female	1	1	1	1	0	0.125	0.125	0.125	EVN	0	0	0	0	LDA
63	5	female	1	1	0	0	0	0	0	0	LDA	0.25	0	0.25	0.25	LAR
45	7	female	1	1	1	1	0	0	0	0	LDA	0.3	0	-0.3	0.3	SML
73	20	female	0	0	0	0	0	0	0	0	LDA	0.175	0	0.075	0.175	EVN
72	9	female	1	0	0	0	0.125	0	0.125	0.125	EVN	0.125	0	0.125	0.125	EVN
74	11	female	0	0	0	0	0	0	0	0	LDA	0	0	0	0	LDA
53	7	male	0	0	0	0	0	0	0	0	LDA	0	0	0	0	LDA
66	8	female	0	0	0	0	0.25	0	0.25	0.25	LAR	0	0	0	0	LDA
69	25	female	1	1	0	0	0.25	0	0.25	0.25	LAR	0	0	0	0	LDA
57	7	female	0	0	0	0	0.475	0.125	-0.1	0.491172	EVN	0	0.25	0.25	0.25	LAR
47	1	female	1	1	0	0	0	0.4	-0.4	0.4	SML	0	0	0	0	LDA
49	7	female	0	0	0	0	0.775	0	-0.025	0.775	EVN	0.125	0	0.125	0.125	EVN
45	8	female	1	1	0	0	0.25	0	0.25	0.25	LAR	0.25	0	0.25	0.25	LAR
61	29	female	1	1	0	0	0	0	0	0	LDA	0	0	0	0	LDA
76	8	female	1	1	0	0	0	0	0	0	LDA	0.125	0	0.125	0.125	EVN
72	7	male	1	1	0	0	0.05	0	-0.05	0.05	LDA	0	0	0	0	LDA
62	28	male	0	0	1	1	0.25	0.25	0.5	0.353553	LAR	0.25	0	0.25	0.25	LAR
81	7	male	1	1	0	0	0	0	0	0	LDA	0	0	0	0	LDA
72	7	female	1	1	0	0	0	0	0	0	LDA	0	0	0	0	LDA
59	7	female	1	1	1	1	0	0	0	0	LDA	0	0	0	0	LDA
80	4	female	1	1	0	0	0.125	0	0.125	0.125	EVN	0.05	0	-0.05	0.05	LDA
56	14	female	1	1	0	0	0	0	0	0	LDA	0	0	0	0	LDA
45	7	female	1	1	0	0	0.8	0	-0.8	0.8	SML	0	0	0	0	LDA
84	11	female	0	0	0	0	1.3	1.5	-0.8	1.98494	SML	1.3	1.5	-0.8	1.98494	SML
67	8	female	1	1	0	0	0.175	0.25	0.325	0.305164	LAR	0.5	0	0.5	0.5	LAR
63	18	female	1	1	0	0	0.125	0	0.125	0.125	EVN	0	0	0	0	LDA
53	7	female	1	1	0	0	0.125	0.708333	0.833333	0.719278	LAR	0	0.616667	0.216667	0.616667	LAR
84	1	male	0	0	0	0	0	0	0	0	LDA	0	0	0	0	LDA
80	7	female	1	1	0	0	0	0	0	0	LDA	0.3	0	-0.3	0.3	SML
74	1	male	0	0	0	0	0.3	0.125	0.325	0.325	LAR	0	0	0	0	LDA
41	7	female	0	0	0	0	0.05	0	-0.05	0.05	LDA	0	0	0	0	LDA
62	11	female	1	1	0	0	0	0	0	0	LDA	0	0	0	0	LDA
68	7	male	0	0	0	0	0.45	0	0.05	0.45	EVN	0	0	0	0	LDA
44	7	female	0	0	1	1	0	0	0	0	LDA	0	0	0	0	LDA
61	12	female	1	1	0	0	0	0.375	0.375	0.375	LAR	0.125	0.25	0.375	0.279508	LAR
69	7	female	0	0	0	0	0.25	0	0.25	0.25	LAR	0.125	0.125	0.25	0.176777	LAR
56	0	female	1	1	1	0	0	0	0	0	LDA	0	0	0	0	LDA
67	7	female	1	1	0	0	0	0	0	0	LDA	0	0	0	0	LDA
69	7	male	1	1	0	0	0	0	0	0	LDA	0	0	0	0	LDA
41	7	female	1	1	0	0	0.25	0	0.25	0.25	LAR	0.125	0	0.125	0.125	EVN
84	7	female	0	0	0	0	0	0	0	0	LDA	0	0	0	0	LDA
83	7	male	1	1	0	0	0.05	0	-0.05	0.05	LDA	0	0	0	0	LDA
68	8	male	0	0	0	0	0	0	0	0	LDA	0	0	0	0	LDA
75	3	male	1	1	0	0	0	0.125	0.125	0.125	EVN	0.175	0	0.075	0.175	EVN
78	7	female	1	0	0	0	0	0	0	0	LDA	0	0	0	0	LDA
44	7	female	1	1	0	0	0.25	0	0.25	0.25	LAR	1.725	0.35	0.675	1.76015	LAR
59	7	female	1	1	0	0	0	0	0	0	LDA	0	0	0	0	LDA
39	7	female	0	0	0	0	0	0	0	0	LDA	0	0	0	0	LDA
72	7	male	1	1	0	0	0	0	0	0	LDA	0	0	0	0	LDA
68	7	female	0	0	0	0	0.125	0	0.125	0.125	EVN	0.125	0.125	0.25	0.176777	LAR
64	7	female	1	1	0	0	0	0	0	0	LDA	0	0	0	0	LDA
67	42	female	1	1	0	0	0.15	0	-0.15	0.15	EVN	0	0.125	0.125	0.125	EVN
68	6	male	0	0	0	0	0.2	0	-0.2	0.2	SML	0.3	0	-0.3	0.3	SML
64	9	male	1	1	0	0	0	0	0	0	LDA	0	0	0	0	LDA
75	18	female	1	1	0	0	0	0	0	0	LDA	0	0	0	0	LDA
55	13	female	1	1	0	0	0.05	0	-0.05	0.05	LDA	0.225	0.125	0.15	0.257391	EVN
63	7	male	1	1	0	0	0.8	0	0.2	0.8	EVN	0.35	0	0.15	0.35	EVN
75	7	female	1	1	0	0	0	0	0	0	LDA	0	0.25	0.25	0.25	LAR
77	7	female	1	1	0	0	0.3	0	-0.3	0.3	SML	0.15	0	-0.15	0.15	EVN
68	6	male	1	1	0	0	0	0	0	0	LDA	0	0	0	0	LDA
62	10	female	1	0	0	0	0.225	0	0.025	0.225	EVN	0.825	0.25	0.675	0.862047	LAR
49	18	female	0	0	0	0	0	0	0	0	LDA	0.1	0	-0.1	0.1	EVN
67	30	female	1	0	0	0	0.125	0	0.125	0.125	EVN	0	0	0	0	LDA
75	7	male	0	0	0	0	0	0	0	0	LDA	0	0	0	0	LDA
45	6	female	1	1	1	1	0.125	0	0.125	0.125	EVN	0	0	0	0	LDA
40	6	female	1	1	0	1	0.2	0	-0.2	0.2	SML	0.225	0	0.025	0.225	EVN
65	4	male	1	1	0	0	0.225	0	0.025	0.225	EVN	0	0.125	0.125	0.125	EVN
79	11	female	1	1	0	0	0	0.125	0.125	0.125	EVN	0	0.125	0.125	0.125	EVN
64	0	male	0	0	0	0	0.625	0.25	0.875	0.673146	LAR	1.175	1.25	-0.175	1.71555	EVN
64	7	female	1	1	0	0	0	0	0	0	LDA	0	0	0	0	LDA
63	10	female	1	1	0	0	0.125	0	0.125	0.125	EVN	0	0	0	0	LDA
86	10	female	0	0	0	0	0	0.25	0.25	0.25	LAR	0.125	0.25	0.375	0.279508	LAR
42	8	female	1	1	0	0	0	0.1	-0.1	0.1	EVN	3	3.16667	-1.83333	4.36208	SML
62	11	female	1	1	0	0	0.05	0	-0.05	0.05	LDA	0	0	0	0	LDA
70	13	female	0	0	0	0	0.375	0	0.375	0.375	LAR	0.25	0.125	0.375	0.279508	LAR
83	16	male	0	1	1	1	0.5	0	0.5	0.5	LAR	0.25	0	0.25	0.25	LAR
80	8	female	1	1	0	0	0	0	0	0	LDA	0	0	0	0	LDA
84	8	female	1	1	0	0	0	0	0	0	LDA	0	0.125	0.125	0.125	EVN
21	6	female	1	1	1	1	0.4	0	0.1	0.4	EVN	0.3	0	0.2	0.3	EVN
84	1	male	1	1	0	0	0	0	0	0	LDA	0	0	0	0	LDA
70	2	female	0	0	0	0	0.25	0	0.25	0.25	LAR	0.125	0	0.125	0.125	EVN
67	13	male	1	1	0	0	0	0	0	0	LDA	0.125	0.125	0.25	0.176777	LAR
67	40	female	1	1	0	0	0	0	0	0	LDA	0	0	0	0	LDA
72	6	female	0	0	0	0	0	0	0	0	LDA	0	0	0	0	LDA
63	8	female	1	1	0	0	0	0	0	0	LDA	0	0	0	0	LDA
63	6	female	1	1	1	1	0.975	1.83333	-0.391667	2.07647	SML	1.175	1.5	-0.925	1.90542	SML
81	14	female	0	0	0	0	0	0	0	0	LDA	0	0.25	0.25	0.25	LAR
68	13	male	0	0	1	1	0	0	0	0	LDA	0	0	0	0	LDA
61	6	female	1	1	0	0	0.55	0	0.45	0.55	LAR	0.25	0	0.25	0.25	LAR
70	6	female	1	1	1	1	0	0	0	0	LDA	0.25	0	0.25	0.25	LAR
65	16	female	1	1	0	0	0	0	0	0	LDA	0	0.333333	0.333333	0.333333	LAR
75	11	female	0	0	1	1	0.225	0.25	0.275	0.336341	LAR	0.125	0	0.125	0.125	EVN
61	6	female	1	1	0	0	0	0	0	0	LDA	0.05	0	-0.05	0.05	LDA
71	6	male	1	1	1	1	0	0	0	0	LDA	0.375	0	0.375	0.375	LAR
70	6	female	0	1	0	0	0	0	0	0	LDA	0	0	0	0	LDA
53	6	female	1	1	0	0	0.125	0	0.125	0.125	EVN	0	0	0	0	LDA
56	21	female	1	1	1	1	0.25	0	0.25	0.25	LAR	0.5	0	0.5	0.5	LAR
55	6	male	1	1	1	1	0.15	0	-0.15	0.15	EVN	0.15	0	-0.15	0.15	EVN
34	9	female	0	0	1	1	0.25	0	0.25	0.25	LAR	0.125	0	0.125	0.125	EVN
75	0	female	0	0	0	0	0.7	0.833333	1.13333	1.08832	LAR	0.45	0	0.05	0.45	EVN
62	6	female	1	1	0	0	0.05	0	-0.05	0.05	LDA	0	0.166667	0.166667	0.166667	EVN
48	1	male	1	1	0	0	1.625	2.58333	-1.79167	3.05192	SML	1.5	1.25	-1.75	1.95256	SML
55	11	female	0	0	0	0	0.5	0	0.5	0.5	LAR	0.55	0	0.45	0.55	LAR
84	10	female	1	1	0	1	0.25	0.541667	0.791667	0.596576	LAR	0	0	0	0	LDA
66	6	female	1	1	0	0	0.275	0	-0.025	0.275	EVN	0.125	0	0.125	0.125	EVN
78	6	female	1	1	0	0	0	0	0	0	LDA	0	0	0	0	LDA
81	15	male	1	1	0	0	0	0	0	0	LDA	0	0	0	0	LDA
51	48	female	1	1	0	0	0.5	0	0.5	0.5	LAR	0.5	0	0.5	0.5	LAR
63	7	male	1	1	0	0	0.125	0	0.125	0.125	EVN	0.25	0	0.25	0.25	LAR
74	15	male	0	0	0	0	0.125	0	0.125	0.125	EVN	0	0	0	0	LDA
47	29	female	0	0	0	0	0.1	0	-0.1	0.1	EVN	0.1	0	-0.1	0.1	EVN
76	6	female	1	1	1	1	0	0.125	0.125	0.125	EVN	0	0	0	0	LDA
83	23	female	0	0	0	0	0	0	0	0	LDA	0	0	0	0	LDA
48	6	female	1	1	1	1	1.3	1.70833	-0.0916667	2.14672	EVN	1.25	1.125	-0.625	1.6817	SML
65	22	male	1	1	1	1	0	0	0	0	LDA	0	0	0	0	LDA
45	12	female	1	1	1	1	0	0	0	0	LDA	0	0	0	0	LDA
22	6	male	1	1	0	0	0	0	0	0	LDA	0	0	0	0	LDA
66	7	female	1	1	1	1	0	0.3	-0.3	0.3	SML	0	0	0	0	LDA
45	6	female	0	0	0	0	0	0	0	0	LDA	0	0	0	0	LDA
47	6	female	0	0	0	0	0.175	0	0.075	0.175	EVN	0	0	0	0	LDA
71	6	male	1	1	0	0	0	0	0	0	LDA	0	0	0	0	LDA
77	6	female	1	1	0	0	0	0	0	0	LDA	0	0	0	0	LDA
81	6	female	0	0	0	0	0	0	0	0	LDA	0	0	0	0	LDA
60	3	female	1	1	0	0	0	0	0	0	LDA	0.2	0	-0.2	0.2	SML
68	11	male	0	0	0	0	0	0	0	0	LDA	0	0	0	0	LDA
63	6	male	1	1	0	0	0	0	0	0	LDA	0.6	0	0.4	0.6	LAR
51	6	female	1	1	1	1	0.1	0	-0.1	0.1	EVN	0	0	0	0	LDA
51	6	female	1	1	0	0	0.225	0	0.025	0.225	EVN	0.3	0	0.2	0.3	EVN
76	16	male	1	1	0	0	0.125	0	0.125	0.125	EVN	0.25	0	0.25	0.25	LAR
76	6	female	0	0	0	0	0	0	0	0	LDA	0	0	0	0	LDA
81	6	female	1	1	0	0	0	0	0	0	LDA	0	0	0	0	LDA
60	23	female	0	1	1	1	0.25	0	0.25	0.25	LAR	0	0	0	0	LDA
46	35	female	1	1	0	0	0.25	0.291667	0.541667	0.384148	LAR	0	0	0	0	LDA
62	10	male	1	1	0	0	0.25	0	0.25	0.25	LAR	0	0	0	0	LDA
68	5	female	0	1	0	0	0.125	0	0.125	0.125	EVN	0.125	0	0.125	0.125	EVN
73	6	female	1	0	0	0	0.25	0.166667	-0.0833333	0.300463	EVN	0.175	1.83333	-0.0916667	1.84167	EVN
44	5	female	1	1	0	0	0.05	0	-0.05	0.05	LDA	0.5	0	-3.72529e-09	0.5	EVN
67	5	male	1	1	1	1	0.125	0	0.125	0.125	EVN	0.25	0	0.25	0.25	LAR
40	7	female	1	1	1	1	0	0	0	0	LDA	0	0	0	0	LDA
69	6	female	1	1	0	0	0	0	0	0	LDA	0	0	0	0	LDA
71	13	female	1	1	0	0	0	0	0	0	LDA	0.125	0.125	0.25	0.176777	LAR
42	6	female	1	1	0	0	0.35	0	-0.35	0.35	SML	0.6	0	-0.1	0.6	EVN
69	25	male	1	1	0	0	0	0	0	0	LDA	0	0	0	0	LDA
74	7	female	1	1	1	1	0	0	0	0	LDA	0	0	0	0	LDA
79	5	male	1	1	0	0	0	0	0	0	LDA	2.7	0.375	-0.325	2.72592	SML
74	15	male	0	0	0	0	0	0	0	0	LDA	0	0	0	0	LDA
49	1	female	1	1	0	0	0.125	0	0.125	0.125	EVN	0	0	0	0	LDA
48	15	female	0	0	1	1	0	0.25	0.25	0.25	LAR	0	0	0	0	LDA
52	6	female	1	0	1	1	0	0	0	0	LDA	0.125	0.166667	0.291667	0.208333	LAR
44	3	female	1	1	0	0	0	0	0	0	LDA	0	0	0	0	LDA
57	3	male	1	1	0	0	0	0	0	0	LDA	0	0	0	0	LDA
48	9	male	1	1	0	0	0	0	0	0	LDA	0.25	0	0.25	0.25	LAR
64	5	female	0	0	0	0	0.8	1.05	-0.85	1.32004	SML	1.1	2.33333	-1.76667	2.57962	SML
72	6	female	1	1	0	0	0	0	0	0	LDA	0.175	0.325	-3.72529e-09	0.369121	EVN
49	6	female	0	0	0	0	0.5	0.125	0.625	0.515388	LAR	0	0	0	0	LDA
67	6	female	1	1	0	0	0.125	0	0.125	0.125	EVN	0.25	0	0.25	0.25	LAR
33	14	female	0	0	1	1	0	0	0	0	LDA	0	0	0	0	LDA
49	5	female	1	1	0	0	0.1	0	-0.1	0.1	EVN	0	0	0	0	LDA
68	7	female	1	1	1	1	0	0	0	0	LDA	0	0	0	0	LDA
66	5	male	0	0	0	0	0	0	0	0	LDA	0	0	0	0	LDA
65	5	female	0	0	0	0	0	0	0	0	LDA	0	0	0	0	LDA
65	5	female	1	1	0	0	0	0	0	0	LDA	0	0	0	0	LDA
48	5	male	0	0	0	0	0.125	0	0.125	0.125	EVN	0	0	0	0	LDA
83	40	female	0	0	0	0	0.175	0	0.075	0.175	EVN	0	0	0	0	LDA
65	5	female	1	1	0	0	0	0	0	0	LDA	0.2	0	-0.2	0.2	SML
75	22	male	0	0	0	0	0	0	0	0	LDA	0	0	0	0	LDA
60	6	female	1	1	0	0	0.325	0.3	-0.375	0.442295	SML	0.2	0.3	-0.5	0.360555	SML
71	8	male	1	1	0	0	0	0	0	0	LDA	0.3	0	0.2	0.3	EVN
42	7	male	0	0	0	0	0	0	0	0	LDA	0.25	0	0.25	0.25	LAR
66	2	female	1	0	0	0	0	0	0	0	LDA	0	0	0	0	LDA
74	8	male	1	1	0	0	0.4	0.85	-0.25	0.939415	SML	0.8	0.75	-0.05	1.09659	EVN
67	44	female	0	0	1	1	0.625	0.125	0.75	0.637377	LAR	0.6	0	0.4	0.6	LAR
85	5	female	0	0	0	0	0	0	0	0	LDA	1.75	2	-0.25	2.65754	SML
72	7	male	1	0	0	0	0	0	0	0	LDA	0	0	0	0	LDA
58	25	female	1	1	0	0	0	0.125	0.125	0.125	EVN	0.125	0.416667	0.541667	0.435013	LAR
53	7	female	1	1	1	1	0.35	0.166667	0.316667	0.387657	LAR	0.35	0.166667	0.316667	0.387657	LAR
59	6	male	0	0	0	0	0	0	0	0	LDA	0	0	0	0	LDA
44	5	male	1	1	0	0	0	0	0	0	LDA	0	0	0	0	LDA
67	5	female	1	1	0	0	0	0	0	0	LDA	0	0	0	0	LDA
75	7	female	0	0	1	1	0	0	0	0	LDA	0	0	0	0	LDA
56	5	female	1	1	0	0	0	0	0	0	LDA	0	0	0	0	LDA
37	5	female	0	1	1	1	0	0	0	0	LDA	0	0	0	0	LDA
65	5	female	1	1	0	0	0.1	0	-0.1	0.1	EVN	0	0	0	0	LDA
45	5	male	0	0	0	0	0	0.2	-0.2	0.2	SML	0	1	-1	1	SML
58	5	female	1	1	0	0	0	0	0	0	LDA	0	0	0	0	LDA
69	5	male	0	0	0	0	0	0	0	0	LDA	0	0	0	0	LDA
47	5	female	1	1	0	0	0	0	0	0	LDA	0	0	0	0	LDA
69	20	female	0	1	0	0	0.125	0	0.125	0.125	EVN	0.125	0	0.125	0.125	EVN
36	5	female	1	1	1	1	0	0	0	0	LDA	0	0	0	0	LDA
72	6	female	1	1	0	0	0.35	0.25	0.4	0.430116	LAR	0	0	0	0	LDA
68	6	female	1	1	0	0	0	0	0	0	LDA	0	0	0	0	LDA
60	5	female	1	1	0	0	0	0	0	0	LDA	0	0	0	0	LDA
44	6	female	0	0	0	0	0	0	0	0	LDA	0.15	0	-0.15	0.15	EVN
65	5	female	1	1	0	0	0.375	0	0.375	0.375	LAR	0	0	0	0	LDA
85	9	female	1	1	0	0	0	0	0	0	LDA	0	0	0	0	LDA
74	24	female	0	0	0	0	0.5	0.25	0.75	0.559017	LAR	0	0	0	0	LDA
30	6	female	0	0	0	0	0.25	2.33333	-1.41667	2.34669	SML	0.25	0	0.25	0.25	LAR
68	5	male	0	0	0	0	0	0	0	0	LDA	0	0	0	0	LDA
61	5	male	1	1	1	1	0	0	0	0	LDA	0	0	0	0	LDA
57	8	female	1	0	0	0	0.2	0	-0.2	0.2	SML	0.2	0	-0.2	0.2	SML
88	5	male	1	1	0	0	0	0	0	0	LDA	0	0	0	0	LDA
66	7	female	1	1	0	0	0.1	0	-0.1	0.1	EVN	0	0	0	0	LDA
46	5	female	1	1	0	0	0	0	0	0	LDA	0.25	0	0.25	0.25	LAR
73	11	male	1	1	0	0	0.725	0	0.025	0.725	EVN	0.1	0	-0.1	0.1	EVN
60	6	male	1	1	0	0	0.05	0	-0.05	0.05	LDA	0	0	0	0	LDA
58	4	male	0	0	0	0	0	0	0	0	LDA	0.125	0	0.125	0.125	EVN
55	9	male	1	1	0	0	0	0.25	0.25	0.25	LAR	0.55	0	-0.05	0.55	EVN
22	5	female	1	1	0	0	0.5	1	-1.5	1.11803	SML	0	0	0	0	LDA
69	4	female	0	0	0	0	0	0	0	0	LDA	0.2	0	-0.2	0.2	SML
68	7	female	1	1	0	0	0	0	0	0	LDA	0	0	0	0	LDA
42	5	female	0	0	1	1	0.05	0	-0.05	0.05	LDA	0.05	0	-0.05	0.05	LDA
73	5	female	1	1	0	0	0	0	0	0	LDA	0	0	0	0	LDA
72	18	female	0	0	0	0	0.475	0.125	0.4	0.491172	LAR	0.5	0.25	0.75	0.559017	LAR
79	4	female	1	1	0	0	0	0	0	0	LDA	0	0	0	0	LDA
56	4	male	1	1	0	0	0	0	0	0	LDA	0	0	0	0	LDA
62	4	female	1	1	0	0	0	0	0	0	LDA	0	0	0	0	LDA
73	18	female	1	1	0	0	0	0	0	0	LDA	0	0	0	0	LDA
67	3	male	0	0	0	0	0	0	0	0	LDA	0	0	0	0	LDA
67	11	male	1	1	0	0	0	0	0	0	LDA	0	0	0	0	LDA
54	4	female	1	1	0	0	0	0	0	0	LDA	0.125	0	0.125	0.125	EVN
74	8	female	0	0	0	0	0.125	0	0.125	0.125	EVN	0.5	0	0.5	0.5	LAR
61	8	male	1	1	0	1	0.65	1.4	-0.55	1.54353	SML	0.85	0	-0.35	0.85	SML
55	11	female	1	1	0	0	0.15	0	-0.15	0.15	EVN	0.95	0	0.05	0.95	EVN
83	4	male	1	1	0	0	0	0	0	0	LDA	0	0	0	0	LDA
43	11	male	1	1	1	1	0.05	0	-0.05	0.05	LDA	0.25	0	0.25	0.25	LAR
72	5	female	1	1	0	0	0	0	0	0	LDA	0	0	0	0	LDA
46	4	female	1	1	0	0	0	0	0	0	LDA	0	0	0	0	LDA
51	5	female	1	1	0	0	0.125	0	0.125	0.125	EVN	0	0	0	0	LDA
49	9	female	1	1	1	1	0	0	0	0	LDA	0	0	0	0	LDA
57	4	female	1	1	0	0	0.25	0	0.25	0.25	LAR	0.125	0	0.125	0.125	EVN
33	5	female	1	1	1	1	0.5	0.25	0.75	0.559017	LAR	0.625	0.5	1.125	0.800391	LAR
71	5	female	0	0	0	0	0.225	0	0.025	0.225	EVN	0.275	0.291667	0.266667	0.400867	LAR
67	4	male	1	1	0	0	0.425	0	0.325	0.425	LAR	0	0	0	0	LDA
68	11	male	0	0	1	1	0	0	0	0	LDA	0	0	0	0	LDA
55	18	female	0	0	0	0	0.5	0.125	0.625	0.515388	LAR	0.35	0	0.15	0.35	EVN
78	35	male	0	1	0	0	0.25	0.125	0.375	0.279508	LAR	0	0	0	0	LDA
63	14	female	1	1	0	0	0.125	0	0.125	0.125	EVN	0	0	0	0	LDA
36	5	female	0	0	0	0	0	0	0	0	LDA	0	0	0	0	LDA
75	34	male	0	0	0	0	0.2	0	-0.2	0.2	SML	0.2	0	-0.2	0.2	SML
35	5	female	1	1	0	0	0.45	0	0.05	0.45	EVN	0.35	0	0.15	0.35	EVN
61	5	female	1	1	0	0	0	0	0	0	LDA	0.1	0	-0.1	0.1	EVN
64	4	female	0	0	1	1	0	0	0	0	LDA	0	0	0	0	LDA
47	9	female	1	1	1	1	0	0	0	0	LDA	0	0	0	0	LDA
70	6	female	0	0	0	1	1.025	0	-0.775	1.025	SML	0.05	0	-0.05	0.05	LDA
70	7	female	1	1	0	0	0	0	0	0	LDA	0	0	0	0	LDA
55	5	female	1	1	0	0	0	0	0	0	LDA	0	0	0	0	LDA
73	4	female	1	1	0	0	0	0	0	0	LDA	0	0	0	0	LDA
71	1	female	1	1	0	0	0.6	0	0.4	0.6	LAR	0.6	0	0.4	0.6	LAR
64	4	female	1	1	0	0	0	0	0	0	LDA	0.4	0.516667	0.416667	0.65341	LAR
71	3	female	0	0	0	0	0	0.125	0.125	0.125	EVN	0.1	0	-0.1	0.1	EVN
64	7	female	0	0	0	0	0	0	0	0	LDA	0	0	0	0	LDA
44	11	female	1	1	0	0	0.25	0	0.25	0.25	LAR	0.625	0	0.625	0.625	LAR
74	4	female	1	1	1	1	0	0.125	0.125	0.125	EVN	0	0	0	0	LDA
71	6	female	0	0	0	0	0	0	0	0	LDA	0	0	0	0	LDA
80	8	male	0	0	0	0	0	0	0	0	LDA	0	0	0	0	LDA
87	11	female	0	0	0	0	0.125	0	0.125	0.125	EVN	0	0	0	0	LDA
77	4	female	0	0	0	0	0.5	0	0.5	0.5	LAR	0	0	0	0	LDA
38	2	female	0	0	1	1	0.25	1.125	-0.625	1.15244	SML	0	0.125	0.125	0.125	EVN
71	4	female	1	1	0	0	0	0	0	0	LDA	0	0	0	0	LDA
49	4	female	1	1	0	0	0	0	0	0	LDA	0	0	0	0	LDA
47	3	male	1	1	0	0	0	0	0	0	LDA	0	0	0	0	LDA
66	6	female	0	0	1	1	0	0	0	0	LDA	0	0	0	0	LDA
76	17	female	0	0	0	0	0	0	0	0	LDA	0	0	0	0	LDA
70	5	female	1	1	0	0	0.05	0	-0.05	0.05	LDA	0	0	0	0	LDA
57	4	female	1	1	0	0	0	0	0	0	LDA	0	0	0	0	LDA
74	4	female	1	1	0	0	0	0	0	0	LDA	0	0.125	0.125	0.125	EVN
44	5	female	0	0	0	0	0	0	0	0	LDA	0.225	0.125	0.15	0.257391	EVN
45	2	female	1	1	0	0	0.175	0	0.075	0.175	EVN	0.1	0	-0.1	0.1	EVN
40	4	female	0	1	1	1	0	0	0	0	LDA	0	0	0	0	LDA
75	4	male	0	0	0	0	0	0.125	0.125	0.125	EVN	0	0	0	0	LDA
74	4	female	1	1	1	1	0	0	0	0	LDA	0	0	0	0	LDA
69	4	female	1	1	0	0	0	0	0	0	LDA	0	0	0	0	LDA
54	4	female	1	1	0	0	0.2	0	-0.2	0.2	SML	0.3	0	-0.3	0.3	SML
51	4	female	1	1	0	0	0	0	0	0	LDA	0	0	0	0	LDA
77	19	male	0	1	0	0	0	0	0	0	LDA	0	0	0	0	LDA
67	40	female	1	1	0	0	0.25	0	0.25	0.25	LAR	0.5	0.25	-0.25	0.559017	SML
68	4	female	1	1	0	0	0.175	0	0.075	0.175	EVN	0	0	0	0	LDA
72	16	female	1	1	1	1	0.75	0	0.75	0.75	LAR	0.125	0.125	0.25	0.176777	LAR
35	1	female	0	0	0	0	0.125	0	0.125	0.125	EVN	0	0	0	0	LDA
37	4	female	1	1	0	0	0.25	0	0.25	0.25	LAR	0.25	0	0.25	0.25	LAR
78	1	female	1	1	0	0	0	0.125	0.125	0.125	EVN	0	0.125	0.125	0.125	EVN
69	4	female	0	0	0	0	0.125	0	0.125	0.125	EVN	0.175	0	0.075	0.175	EVN
68	4	female	1	0	0	0	0.55	0	-0.05	0.55	EVN	0.1	0	-0.1	0.1	EVN
76	3	female	0	0	0	0	0	0	0	0	LDA	0	0	0	0	LDA
45	5	female	1	1	1	1	0	0	0	0	LDA	0.675	0	0.075	0.675	EVN
82	3	female	1	1	0	0	0	0	0	0	LDA	0	0	0	0	LDA
54	4	male	1	1	0	0	0	0	0	0	LDA	0	0	0	0	LDA
63	8	male	1	1	0	0	0.1	0	-0.1	0.1	EVN	0	0	0	0	LDA
74	4	male	1	1	0	0	0.875	0.291667	0.166667	0.922331	EVN	0	0	0	0	LDA
65	3	female	1	1	0	0	0	0	0	0	LDA	0	0	0	0	LDA
43	12	female	1	1	0	0	0.05	0	-0.05	0.05	LDA	0	0	0	0	LDA
40	4	female	1	1	0	0	0.2	0	-0.2	0.2	SML	0.15	0	-0.15	0.15	EVN
27	4	female	0	0	0	0	0.05	0	-0.05	0.05	LDA	0	0	0	0	LDA
79	4	female	1	1	0	0	0	0	0	0	LDA	0	0	0	0	LDA
62	4	female	1	1	0	0	0	0	0	0	LDA	0	0	0	0	LDA
86	1	female	0	0	0	0	0	0	0	0	LDA	0	0	0	0	LDA
61	23	female	0	0	0	0	0.05	0	-0.05	0.05	LDA	0.1	0	-0.1	0.1	EVN
48	8	female	1	1	0	0	0	0.4	-0.4	0.4	SML	0.05	0.1	-0.15	0.111803	EVN
44	4	female	1	1	0	0	0.125	0.125	0.25	0.176777	LAR	0.25	0	0.25	0.25	LAR
78	9	female	0	0	0	0	0.7	0	0.3	0.7	LAR	0.7	0.333333	0.633333	0.775314	LAR
69	3	male	1	1	0	0	0.875	0.5	1.375	1.00778	LAR	0.75	0.5	1.25	0.901388	LAR
49	4	female	1	1	0	0	0.25	0	0.25	0.25	LAR	0.9	0	0.1	0.9	EVN
64	6	female	0	1	0	0	0.25	0.25	0.5	0.353553	LAR	0.25	0.166667	0.416667	0.300463	LAR
74	3	female	1	1	0	0	0	0	0	0	LDA	0.1	0	-0.1	0.1	EVN
47	4	male	1	1	0	0	0.25	0	0.25	0.25	LAR	0.25	0	0.25	0.25	LAR
35	4	female	1	1	0	0	0.125	0	0.125	0.125	EVN	0.25	0	0.25	0.25	LAR
31	3	male	1	1	0	1	0.05	0	-0.05	0.05	LDA	0	0	0	0	LDA
52	4	female	1	1	0	0	0	0	0	0	LDA	0	0	0	0	LDA
54	11	female	1	1	0	0	0.05	0.166667	0.116667	0.174005	EVN	0	0	0	0	LDA
47	3	female	1	1	1	1	0	0	0	0	LDA	0	0	0	0	LDA
65	3	female	1	1	0	0	0	0	0	0	LDA	0	0	0	0	LDA
53	4	male	1	1	0	0	0	0	0	0	LDA	0	0	0	0	LDA
53	12	male	1	1	0	0	0	0	0	0	LDA	0	0	0	0	LDA
49	3	female	1	1	0	0	0	0	0	0	LDA	0	0	0	0	LDA
71	4	female	1	1	0	0	0.275	0	-0.025	0.275	EVN	0.125	0	0.125	0.125	EVN
52	13	female	0	0	1	1	0.25	0	0.25	0.25	LAR	0.3	0	0.2	0.3	EVN
61	3	female	1	1	0	0	0.15	0.166667	0.0166667	0.224227	EVN	0	0	0	0	LDA
76	16	female	1	1	0	0	0	0.2	-0.2	0.2	SML	0.35	0.2	-0.05	0.403113	EVN
77	3	female	1	1	0	0	0	0	0	0	LDA	0	0.25	0.25	0.25	LAR
41	7	female	1	1	0	0	0.25	0	-0.25	0.25	SML	0	0	0	0	LDA
62	5	female	1	1	1	1	0	0	0	0	LDA	0	0.2	-0.2	0.2	SML
81	3	female	1	0	0	0	0	0	0	0	LDA	0	0	0	0	LDA
77	12	female	1	1	0	0	0.125	0	0.125	0.125	EVN	0	0	0	0	LDA
66	6	male	1	1	0	0	0	0	0	0	LDA	0	0	0	0	LDA
46	4	female	1	1	0	0	0	0	0	0	LDA	0	0.125	0.125	0.125	EVN
66	3	female	0	0	0	0	0.275	0	-0.025	0.275	EVN	0.375	0.125	0.5	0.395285	LAR
59	3	female	0	0	0	0	0	0	0	0	LDA	0.15	0	-0.15	0.15	EVN
40	4	female	0	0	1	0	0.25	0.2	0.05	0.320156	EVN	0.25	0.291667	0.541667	0.384148	LAR
75	3	female	0	0	0	0	0	0.125	0.125	0.125	EVN	0	0	0	0	LDA
57	14	female	0	0	0	0	0.325	0	-0.075	0.325	EVN	0.275	0	-0.025	0.275	EVN
66	11	female	0	0	0	0	0.125	0.125	0.25	0.176777	LAR	1.75	0.25	0	1.76777	EVN
47	8	male	0	0	0	0	0.25	0	0.25	0.25	LAR	0	0	0	0	LDA
69	1	female	1	1	0	0	0.125	0	0.125	0.125	EVN	0	0	0	0	LDA
62	3	male	1	1	0	0	0	0	0	0	LDA	0	0	0	0	LDA
74	6	female	1	1	1	1	0	0	0	0	LDA	0.65	0.2	0.15	0.680074	EVN
54	2	female	1	1	0	0	0.1	0.25	0.15	0.269258	EVN	0	0.375	0.375	0.375	LAR
73	4	female	1	1	0	0	0	0	0	0	LDA	0	0	0	0	LDA
38	3	female	0	0	1	1	0	0	0	0	LDA	0	0	0	0	LDA
67	7	female	1	1	1	1	0	0	0	0	LDA	0.05	0	-0.05	0.05	LDA
58	3	female	1	1	1	1	0.125	0	0.125	0.125	EVN	0	0	0	0	LDA
78	6	female	1	1	0	0	0.05	0	-0.05	0.05	LDA	0.3	0	0.2	0.3	EVN
80	1	female	1	1	0	0	0	0	0	0	LDA	0.05	0	-0.05	0.05	LDA
58	12	male	1	0	0	0	0	0.25	0.25	0.25	LAR	0	0.25	0.25	0.25	LAR
39	34	female	0	0	1	1	0	0.1	-0.1	0.1	EVN	0	0	0	0	LDA
39	4	female	1	1	0	0	0	0	0	0	LDA	0	0	0	0	LDA
77	3	female	1	1	0	0	0	0	0	0	LDA	0	0	0	0	LDA
68	3	female	1	1	0	0	0.25	0	0.25	0.25	LAR	1.025	1.78333	-1.39167	2.05692	SML
78	4	female	1	1	0	0	0	0	0	0	LDA	0	0	0	0	LDA
80	3	female	1	0	0	1	0	0.125	0.125	0.125	EVN	0	0	0	0	LDA
74	12	female	1	1	0	0	0.125	0	0.125	0.125	EVN	0	0	0	0	LDA
51	25	male	1	1	0	0	0	0	0	0	LDA	0	0	0	0	LDA
63	3	female	0	1	0	0	0.05	0	-0.05	0.05	LDA	0.5	0	0.5	0.5	LAR
64	5	female	1	1	0	0	0	0.291667	0.291667	0.291667	LAR	0	0.291667	0.291667	0.291667	LAR
59	3	male	1	1	0	0	0	0	0	0	LDA	0.05	0	-0.05	0.05	LDA
72	3	female	1	1	0	0	0.125	0	0.125	0.125	EVN	0	0	0	0	LDA
67	3	female	0	0	0	0	0	0	0	0	LDA	0	0	0	0	LDA
54	3	male	1	1	0	0	0	0	0	0	LDA	0	0	0	0	LDA
68	3	female	1	1	0	0	0.975	0.333333	0.608333	1.03041	LAR	1.65	0	-0.15	1.65	EVN
56	5	female	1	1	1	1	0	0	0	0	LDA	0.1	0	-0.1	0.1	EVN
74	4	female	0	0	0	0	0	0	0	0	LDA	0	0.25	0.25	0.25	LAR
70	6	female	1	1	0	0	0	0	0	0	LDA	0	0.125	0.125	0.125	EVN
58	3	female	0	0	0	0	0	0	0	0	LDA	0	0	0	0	LDA
67	7	female	1	1	0	0	0.55	0.125	0.075	0.564026	EVN	0	0.2	-0.2	0.2	SML
30	3	female	1	1	0	0	0	0	0	0	LDA	0	0	0	0	LDA
80	3	female	0	0	0	0	0	0	0	0	LDA	0.6	0	-0.1	0.6	EVN
57	14	male	1	1	0	0	0	0	0	0	LDA	0	0	0	0	LDA
77	3	male	1	1	0	0	0	0	0	0	LDA	0	0	0	0	LDA
39	3	female	1	1	0	0	0.1	0	-0.1	0.1	EVN	1.025	0.125	0.35	1.03259	LAR
66	3	female	1	1	0	0	0	0	0	0	LDA	0	0	0	0	LDA
42	3	female	0	0	0	0	0.15	0	-0.15	0.15	EVN	0	0	0	0	LDA
65	3	male	1	1	1	1	0	0	0	0	LDA	0	0	0	0	LDA
73	3	female	1	1	0	0	0	0	0	0	LDA	0	0	0	0	LDA
34	4	female	1	1	1	1	0	0.166667	0.166667	0.166667	EVN	0	0.166667	0.166667	0.166667	EVN
50	3	female	1	1	0	0	0.05	0	-0.05	0.05	LDA	0.05	0	-0.05	0.05	LDA
69	3	female	1	1	0	0	0.275	0	-0.025	0.275	EVN	0	0	0	0	LDA
65	15	female	1	1	0	0	0	0	0	0	LDA	0	0	0	0	LDA
64	3	male	1	1	0	0	0	0	0	0	LDA	0	0	0	0	LDA
65	8	male	1	0	0	0	0	0	0	0	LDA	0.25	0	-0.25	0.25	SML
50	11	female	1	1	1	1	0.25	0	0.25	0.25	LAR	0	0	0	0	LDA
66	6	female	1	1	0	0	0	0	0	0	LDA	0	0	0	0	LDA
57	4	female	1	1	0	0	0	0	0	0	LDA	0.1	0.1	-0.2	0.141421	SML
51	22	female	1	1	1	1	0	0.25	0.25	0.25	LAR	0	0.125	0.125	0.125	EVN
45	3	female	1	1	0	0	0	0	0	0	LDA	0	0	0	0	LDA
90	0	female	0	1	0	0	0.55	0.775	-0.075	0.950329	EVN	0	0.416667	0.416667	0.416667	LAR
68	3	female	1	1	0	0	0	0	0	0	LDA	0.275	1	-1.025	1.03712	SML
69	21	female	1	1	0	0	0.85	0	0.15	0.85	EVN	0	0	0	0	LDA
55	7	female	1	1	0	0	0.25	0.2	0.05	0.320156	EVN	0	0	0	0	LDA
60	40	female	0	0	0	0	0.375	0.583333	0.958333	0.693472	LAR	0.25	0.125	0.375	0.279508	LAR
58	6	female	0	0	0	0	0.55	0.125	0.075	0.564026	EVN	0.4	0	0.1	0.4	EVN
34	3	female	0	0	0	0	0.25	0	0.25	0.25	LAR	0.25	0	0.25	0.25	LAR
25	11	male	1	1	0	1	0	0	0	0	LDA	0	0	0	0	LDA
50	3	female	1	1	0	0	0.25	0.25	0	0.353553	EVN	0	0.25	0.25	0.25	LAR
70	27	female	1	1	1	1	0	0	0	0	LDA	0	0	0	0	LDA
39	3	male	0	1	0	0	0	0	0	0	LDA	0	0	0	0	LDA
76	5	female	0	0	0	0	1.075	1.125	-1.7	1.55604	SML	0.25	0.25	0.5	0.353553	LAR
67	3	female	1	1	0	0	0	0	0	0	LDA	0.2	0	-0.2	0.2	SML
60	4	female	0	0	0	0	0.1	0	-0.1	0.1	EVN	0.05	0	-0.05	0.05	LDA
73	3	female	0	0	0	0	0	0	0	0	LDA	0	0	0	0	LDA
45	10	female	1	1	0	0	0.1	0	-0.1	0.1	EVN	0.2	0.125	-0.075	0.23585	EVN
74	10	female	0	0	0	0	0	0	0	0	LDA	0	0	0	0	LDA
46	4	female	0	0	0	0	0	0	0	0	LDA	0	0	0	0	LDA
79	2	male	1	1	0	0	0	0	0	0	LDA	0	0	0	0	LDA
75	2	female	1	1	0	0	0	0	0	0	LDA	0	0	0	0	LDA
33	2	female	0	1	0	0	0.25	0	0.25	0.25	LAR	0	0	0	0	LDA
49	2	female	1	1	0	0	0	0	0	0	LDA	0.35	0	0.15	0.35	EVN
44	2	female	1	1	0	0	0.125	0.2	-0.075	0.23585	EVN	0	0	0	0	LDA
66	2	female	1	1	0	0	0.05	0.125	0.075	0.134629	EVN	0	0	0	0	LDA
75	5	female	0	0	0	0	0.125	0	0.125	0.125	EVN	0	0	0	0	LDA
75	2	female	0	0	0	0	1.7	1	-1.2	1.97231	SML	1.2	0	-0.7	1.2	SML
48	6	female	1	1	0	0	0	0	0	0	LDA	0	0	0	0	LDA
82	2	male	1	1	0	0	0	0	0	0	LDA	0	0	0	0	LDA
63	3	male	0	0	0	0	0.25	0	0.25	0.25	LAR	0.25	0.125	0.375	0.279508	LAR
73	3	male	1	1	0	0	0	0	0	0	LDA	0	0	0	0	LDA
73	18	female	1	1	0	0	0.525	0	0.225	0.525	LAR	0.05	0.3	-0.35	0.304138	SML
81	28	female	1	1	0	0	0.1	0	-0.1	0.1	EVN	0	0	0	0	LDA
41	4	female	1	1	0	0	0.375	0	0.375	0.375	LAR	0	0.25	0.25	0.25	LAR
76	2	male	0	0	0	0	0	0	0	0	LDA	0.125	0	0.125	0.125	EVN
79	4	female	1	1	1	1	0.375	0	0.375	0.375	LAR	0.25	0	0.25	0.25	LAR
67	37	male	0	0	1	1	0	0	0	0	LDA	0	0	0	0	LDA
63	10	female	0	0	0	0	0	0	0	0	LDA	0.45	0	0.05	0.45	EVN
35	2	female	1	1	0	0	0	0	0	0	LDA	0	0	0	0	LDA
85	7	female	1	1	0	0	0	0	0	0	LDA	0	0	0	0	LDA
71	4	female	1	1	0	0	0	0	0	0	LDA	0	0	0	0	LDA
47	3	male	1	1	0	0	0	0	0	0	LDA	0	0	0	0	LDA
67	23	female	1	1	1	1	0	0	0	0	LDA	0	0.125	0.125	0.125	EVN
47	2	male	0	0	0	0	0	0	0	0	LDA	0.2	0	-0.2	0.2	SML
72	8	female	0	0	1	1	0	0	0	0	LDA	0.1	0	-0.1	0.1	EVN
76	23	female	0	0	1	1	0	0	0	0	LDA	0	0.25	0.25	0.25	LAR
70	0	male	0	0	0	0	0	0	0	0	LDA	0	0	0	0	LDA
56	1	female	0	0	0	0	0	0.25	0.25	0.25	LAR	0	0	0	0	LDA
62	5	male	0	1	1	1	0	0	0	0	LDA	0	0	0	0	LDA
53	2	female	1	1	0	0	0	0	0	0	LDA	0	0	0	0	LDA
73	3	female	1	1	0	0	0	0	0	0	LDA	0	0	0	0	LDA
72	3	female	0	0	0	0	0	1.15	-0.65	1.15	SML	0	0	0	0	LDA
28	6	female	0	0	0	0	0	0	0	0	LDA	0.25	0	0.25	0.25	LAR
58	3	female	1	1	0	0	0	0	0	0	LDA	0	0	0	0	LDA
80	2	female	1	1	0	1	0.1	0.125	0.025	0.160078	EVN	0.4	0	-0.4	0.4	SML
48	2	female	0	0	1	1	0	0	0	0	LDA	0	0	0	0	LDA
42	21	male	0	0	0	0	0	0	0	0	LDA	0	0	0	0	LDA
37	2	male	1	1	0	0	0	0	0	0	LDA	0	0	0	0	LDA
40	0	female	1	1	0	0	0	0	0	0	LDA	0.25	0	0.25	0.25	LAR
30	3	female	0	0	0	0	0.5	0	0.5	0.5	LAR	0.5	0	0.5	0.5	LAR
68	2	female	1	1	0	0	1.5	0.5	-1	1.58114	SML	0	0	0	0	LDA
75	21	female	1	1	0	0	0	0	0	0	LDA	0.25	0	0.25	0.25	LAR
67	4	female	0	0	0	0	0.5	0	0.5	0.5	LAR	0.5	0	0.5	0.5	LAR
56	2	female	1	1	1	1	0	0.5	0.5	0.5	LAR	0	0.583333	0.583333	0.583333	LAR
56	3	male	1	1	0	0	0	0	0	0	LDA	0	0	0	0	LDA
75	12	female	1	1	0	0	0.25	0	0.25	0.25	LAR	0.475	0	0.275	0.475	LAR
63	2	female	0	0	1	1	0.225	0.1	-0.075	0.246221	EVN	0	0	0	0	LDA
65	2	female	0	0	1	1	0.775	0.125	0.6	0.785016	LAR	1.25	0.833333	1.08333	1.50231	LAR
74	2	female	0	0	0	0	0.15	0	-0.15	0.15	EVN	0	0	0	0	LDA
55	2	female	1	1	0	0	0	0	0	0	LDA	0	0	0	0	LDA
79	2	female	1	1	0	0	0	0	0	0	LDA	0	0	0	0	LDA
73	2	female	1	1	0	0	0	0	0	0	LDA	0	0	0	0	LDA
77	4	female	1	1	0	0	0	0	0	0	LDA	0	0	0	0	LDA
37	4	female	0	0	1	1	0	0	0	0	LDA	0	0	0	0	LDA
72	10	male	1	1	0	0	0	0	0	0	LDA	0	0	0	0	LDA
57	2	female	1	1	0	0	0.125	0	0.125	0.125	EVN	0.05	0	-0.05	0.05	LDA
81	13	male	1	1	1	1	0.125	0	0.125	0.125	EVN	0.25	0	0.25	0.25	LAR
43	3	female	1	1	0	0	0	0	0	0	LDA	0	0	0	0	LDA
59	19	female	1	1	0	0	0	0	0	0	LDA	0	0	0	0	LDA
62	10	male	1	1	0	0	0	0	0	0	LDA	0	0.291667	0.291667	0.291667	LAR
57	2	male	1	1	0	0	0	0	0	0	LDA	0	0	0	0	LDA
43	2	female	0	0	0	0	0	0	0	0	LDA	0	0.3	-0.3	0.3	SML
15	2	female	1	1	1	1	0.125	0	0.125	0.125	EVN	0	0	0	0	LDA
69	29	female	0	0	1	0	0	0.4	-0.4	0.4	SML	0	0	0	0	LDA
66	2	male	1	1	0	0	0.375	0	-0.125	0.375	EVN	0.375	0	-0.125	0.375	EVN
79	6	male	1	1	0	0	0.35	0	0.15	0.35	EVN	0	0	0	0	LDA
89	2	female	0	0	0	0	0	0	0	0	LDA	0	0	0	0	LDA
61	2	male	1	1	0	0	0	0	0	0	LDA	0	0	0	0	LDA
73	9	female	0	0	0	0	0.125	0.125	0.25	0.176777	LAR	0	0	0	0	LDA
44	4	female	0	1	0	0	0	0	0	0	LDA	0.275	0	-0.025	0.275	EVN
63	2	male	1	1	0	0	0	0	0	0	LDA	0	0	0	0	LDA
76	8	male	1	1	0	0	0	0	0	0	LDA	0	0	0	0	LDA
57	5	male	1	1	0	0	0.125	0	0.125	0.125	EVN	0.4	0	-0.4	0.4	SML
55	2	female	1	1	0	0	0	1.41667	-0.583333	1.41667	SML	0.55	1.54167	-0.508333	1.63684	SML
72	2	female	1	1	0	0	0	0	0	0	LDA	0.125	0	0.125	0.125	EVN
41	14	female	0	0	1	1	0	0	0	0	LDA	0.125	0	0.125	0.125	EVN
53	7	female	1	1	0	0	0	0	0	0	LDA	0.05	0	-0.05	0.05	LDA
74	3	female	1	1	0	0	0	0	0	0	LDA	0	0	0	0	LDA
46	10	female	1	1	1	1	0	0	0	0	LDA	0.125	0	0.125	0.125	EVN
44	2	female	1	1	0	0	0	0	0	0	LDA	0	0.6	-0.6	0.6	SML
65	2	female	0	1	0	0	0.1	0	-0.1	0.1	EVN	0	0	0	0	LDA
78	8	female	0	0	0	0	0	0	0	0	LDA	0	0	0	0	LDA
31	2	female	1	1	0	0	0	0	0	0	LDA	0	0	0	0	LDA
25	2	female	1	1	0	0	0	0	0	0	LDA	0.125	0	0.125	0.125	EVN
46	1	female	1	1	0	0	0	0	0	0	LDA	0.125	0.125	0.25	0.176777	LAR
69	2	female	1	1	0	0	0.1	0.125	0.025	0.160078	EVN	0.15	0	-0.15	0.15	EVN
60	4	female	1	1	0	0	0.1	0.125	0.025	0.160078	EVN	0	0	0	0	LDA
68	2	female	1	1	0	0	0	0	0	0	LDA	0	0	0	0	LDA
74	2	male	0	0	0	0	1	0	1	1	LAR	0.2	0	-0.2	0.2	SML
67	2	male	1	1	1	1	0	0	0	0	LDA	0	0	0	0	LDA
75	12	female	1	1	1	1	0	0	0	0	LDA	0	0	0	0	LDA
70	2	male	1	1	0	0	0	0	0	0	LDA	0	0	0	0	LDA
81	4	female	1	1	0	0	0.25	0	0.25	0.25	LAR	0	0	0	0	LDA
68	4	female	0	0	1	1	0.3	0.333333	0.0333333	0.448454	EVN	0	0.333333	0.333333	0.333333	LAR
60	7	female	1	1	0	0	0	0	0	0	LDA	0	0	0	0	LDA
39	9	female	0	0	1	1	0	0	0	0	LDA	0	0	0	0	LDA
71	2	female	1	1	0	0	0	0	0	0	LDA	0	0	0	0	LDA
67	2	female	1	1	0	0	0.7	0	0.3	0.7	LAR	0.9	1.33333	-0.566667	1.60866	SML
45	2	female	1	1	0	0	0.75	0	-0.25	0.75	SML	1.175	1.05	-0.475	1.57579	SML
63	6	female	1	1	0	0	0	0	0	0	LDA	0	0	0	0	LDA
59	4	female	0	0	0	0	0	0.125	0.125	0.125	EVN	0	0	0	0	LDA
63	3	female	1	1	0	0	0	0	0	0	LDA	0	0	0	0	LDA
78	2	female	1	1	1	1	0	0	0	0	LDA	0	0	0	0	LDA
61	3	female	1	1	0	0	0	0.125	0.125	0.125	EVN	0	0	0	0	LDA
74	33	female	0	0	0	0	0.4	0.291667	0.391667	0.495045	LAR	0.225	0	0.025	0.225	EVN
43	2	female	1	0	0	0	0.125	0	0.125	0.125	EVN	0	0	0	0	LDA
49	8	female	0	0	0	0	0.225	0.533333	0.158333	0.578852	EVN	0.4	0	0.1	0.4	EVN
57	1	female	0	0	0	0	0.05	0	-0.05	0.05	LDA	0.05	0	-0.05	0.05	LDA
23	2	female	1	1	1	1	0	0	0	0	LDA	0	0	0	0	LDA
67	9	female	0	0	0	0	0	0	0	0	LDA	0	0.25	0.25	0.25	LAR
79	9	male	1	1	0	0	0	0.125	0.125	0.125	EVN	0	0	0	0	LDA
68	2	female	1	1	0	0	0	0	0	0	LDA	0.05	0	-0.05	0.05	LDA
88	2	female	0	0	0	0	0	0	0	0	LDA	0	0	0	0	LDA
62	1	female	1	1	0	0	0	0	0	0	LDA	0.7	0.25	0.05	0.743303	EVN
76	3	male	0	0	0	0	0	0	0	0	LDA	0.175	0	0.075	0.175	EVN
28	1	male	1	1	0	0	0	0	0	0	LDA	0	0	0	0	LDA
62	1	female	0	0	0	0	0.125	0.125	0.25	0.176777	LAR	0.125	0.125	0.25	0.176777	LAR
65	2	female	0	0	0	0	0.575	0.658333	0.433333	0.874087	LAR	0	0.583333	0.583333	0.583333	LAR
75	2	female	1	1	0	0	0	0	0	0	LDA	0	0	0	0	LDA
41	1	female	1	1	0	0	0.125	0.2	-0.075	0.23585	EVN	0.05	0	-0.05	0.05	LDA
88	12	female	0	0	0	0	0	0	0	0	LDA	0	0	0	0	LDA
61	13	female	0	0	0	0	0.325	0	-0.075	0.325	EVN	0.525	0	-0.275	0.525	SML
47	1	female	1	1	0	0	2.05	0.25	-0.3	2.06519	SML	0.5	0.25	0.75	0.559017	LAR
66	8	male	1	1	0	0	0	0	0	0	LDA	0	0	0	0	LDA
43	1	male	1	1	0	0	0.125	0	0.125	0.125	EVN	0.125	0	0.125	0.125	EVN
86	17	female	0	0	1	1	0.125	0	0.125	0.125	EVN	0	0	0	0	LDA
70	12	female	0	0	0	0	0.6	0.291667	0.691667	0.667135	LAR	0.925	0.416667	0.741667	1.01451	LAR
59	4	female	0	1	0	0	0	0	0	0	LDA	0	0	0	0	LDA
48	1	female	1	1	1	1	0	0.125	0.125	0.125	EVN	0.325	0.375	0.3	0.496236	LAR
53	16	female	1	1	1	0	1.1	0.291667	0.691667	1.13801	LAR	0	0	0	0	LDA
50	3	female	0	0	0	0	0.125	0.125	0.25	0.176777	LAR	0.25	0.125	0.375	0.279508	LAR
53	2	male	0	0	0	0	0	0	0	0	LDA	0	0	0	0	LDA
63	1	male	1	1	0	0	0	0	0	0	LDA	0	0	0	0	LDA
61	43	female	1	0	1	1	0.125	0	0.125	0.125	EVN	0	0	0	0	LDA
85	5	female	1	1	0	0	0	0.125	0.125	0.125	EVN	0	0	0	0	LDA
67	2	female	1	1	0	0	0	0	0	0	LDA	0	0	0	0	LDA
56	2	female	1	1	0	0	0.625	0	0.125	0.625	EVN	0.4	0	-0.4	0.4	SML
54	1	female	1	1	0	0	0.125	0	0.125	0.125	EVN	0	0	0	0	LDA
83	2	male	0	0	1	1	0	0	0	0	LDA	0	0	0	0	LDA
57	5	female	1	0	0	0	0	0	0	0	LDA	0	0	0	0	LDA
76	1	female	0	0	0	0	0	0	0	0	LDA	0	0	0	0	LDA
66	1	female	1	1	0	0	0	0	0	0	LDA	0	0	0	0	LDA
49	1	female	0	1	0	0	0	0.1	-0.1	0.1	EVN	0	0	0	0	LDA
83	1	male	0	0	0	0	0	0	0	0	LDA	0	0	0	0	LDA
79	1	female	1	1	0	0	0	0	0	0	LDA	0.625	0	0.625	0.625	LAR
61	38	female	0	0	0	0	0.25	0.25	0.5	0.353553	LAR	0.375	0.25	0.625	0.450694	LAR
30	3	male	1	0	1	1	0.35	0	0.15	0.35	EVN	0	0	0	0	LDA
49	1	female	1	1	0	0	0.375	0	0.375	0.375	LAR	0.2	0	-0.2	0.2	SML
36	1	female	0	0	1	1	0.225	0	0.025	0.225	EVN	0.125	0	0.125	0.125	EVN
45	1	female	0	0	1	1	0.1	0	-0.1	0.1	EVN	0	0	0	0	LDA
49	1	female	1	1	0	0	0.25	0	0.25	0.25	LAR	0	0	0	0	LDA
65	11	female	0	0	0	0	0	0.125	0.125	0.125	EVN	0.325	0.491667	0.0166667	0.589373	EVN
54	1	female	1	1	0	1	0	0.25	0.25	0.25	LAR	0	0	0	0	LDA
61	4	female	1	1	0	0	0.35	0.616667	0.366667	0.709068	LAR	0	0	0	0	LDA
65	18	female	1	1	1	1	0	0.291667	0.291667	0.291667	LAR	0	0.291667	0.291667	0.291667	LAR
41	1	female	1	1	0	0	0.05	0	-0.05	0.05	LDA	0	0	0	0	LDA
61	11	female	1	1	0	0	0.1	0	-0.1	0.1	EVN	0.625	0	0.625	0.625	LAR
66	1	male	0	1	0	0	0	0	0	0	LDA	0	0	0	0	LDA
69	8	female	1	1	0	0	0.4	0	0.1	0.4	EVN	0.4	0	0.1	0.4	EVN
39	3	female	1	1	1	1	0	0	0	0	LDA	0.05	0	-0.05	0.05	LDA
46	1	female	1	1	0	0	0	0	0	0	LDA	0	0	0	0	LDA
26	1	female	1	1	0	0	0.4	0.4	-0.3	0.565685	SML	0.6	0.6	-0.2	0.848528	SML
53	1	female	1	1	0	0	0.85	0.5	1.15	0.986154	LAR	0	0	0	0	LDA
59	1	male	1	1	0	0	0	0	0	0	LDA	0	0	0	0	LDA
66	20	male	1	1	0	0	0.125	0	0.125	0.125	EVN	0.125	0	0.125	0.125	EVN
37	17	female	0	0	1	1	0	0	0	0	LDA	0	0	0	0	LDA
70	38	female	1	1	0	0	0.375	0	0.375	0.375	LAR	0.25	0.125	0.375	0.279508	LAR
72	2	male	0	0	0	0	0.25	0	0.25	0.25	LAR	0	0	0	0	LDA
78	1	male	1	1	0	0	0	0	0	0	LDA	0	0	0	0	LDA
70	1	male	1	1	0	0	0	0.125	0.125	0.125	EVN	0.05	0.2	-0.25	0.206155	SML
32	1	female	1	0	0	1	0.475	0.2	0.075	0.515388	EVN	0.775	0.1	0.375	0.781425	LAR
56	1	female	1	1	0	0	0	0	0	0	LDA	0	0	0	0	LDA
78	22	female	0	0	0	0	0	0	0	0	LDA	0.525	0.75	-0.025	0.915492	EVN
71	2	female	1	1	0	0	0.05	0	-0.05	0.05	LDA	0.125	0	0.125	0.125	EVN
70	6	female	1	1	0	0	0	0	0	0	LDA	0	0	0	0	LDA
46	6	female	1	1	0	0	0	0	0	0	LDA	0	0	0	0	LDA
48	1	female	1	1	0	0	0.125	0	0.125	0.125	EVN	0	0	0	0	LDA
66	1	female	1	1	0	0	0	0	0	0	LDA	0	0	0	0	LDA
69	1	male	1	1	0	0	0.05	0	-0.05	0.05	LDA	0	0	0	0	LDA
55	5	female	1	1	0	0	0.175	0	0.075	0.175	EVN	0.175	0	0.075	0.175	EVN
42	1	female	1	1	0	0	0.05	0.1	-0.15	0.111803	EVN	0.9	2.33333	-2.06667	2.50089	SML
58	15	male	1	0	1	0	0	2.33333	-1.66667	2.33333	SML	0	0.5	-0.5	0.5	SML
70	12	female	1	1	0	0	0.05	0	-0.05	0.05	LDA	0	0	0	0	LDA
58	1	male	1	1	0	0	0.125	0	0.125	0.125	EVN	0.65	0.3	-0.45	0.715891	SML
79	20	female	1	1	1	1	0	0	0	0	LDA	0	0	0	0	LDA
83	3	female	0	0	0	0	0	0	0	0	LDA	0	0	0	0	LDA
38	1	female	1	1	0	0	0	0	0	0	LDA	0	0	0	0	LDA
45	1	female	1	1	0	0	0	0	0	0	LDA	0	0	0	0	LDA
89	1	female	0	0	0	0	0.25	0	0.25	0.25	LAR	0.25	0	0.25	0.25	LAR
41	1	female	0	0	0	1	0.2	0.2	-0.4	0.282843	SML	0.35	0	-0.35	0.35	SML
57	0	female	0	0	0	0	0	0	0	0	LDA	0	0	0	0	LDA
75	0	female	1	1	0	0	0	0	0	0	LDA	0	0	0	0	LDA
66	12	female	0	0	0	0	0.125	0	0.125	0.125	EVN	0	0	0	0	LDA
52	6	male	1	0	0	0	0	0	0	0	LDA	0	0	0	0	LDA
60	27	female	1	1	0	0	0.15	0	-0.15	0.15	EVN	0.55	0	-0.05	0.55	EVN
62	39	female	0	0	0	0	0.225	0	0.025	0.225	EVN	0.225	0	0.025	0.225	EVN
51	1	female	1	1	0	0	0.125	0	0.125	0.125	EVN	0	0	0	0	LDA
67	4	male	0	0	0	0	0.75	0.55	-0.3	0.930054	SML	0	0	0	0	LDA
40	10	female	0	0	1	1	0	0	0	0	LDA	0	0	0	0	LDA
62	1	male	0	1	0	0	0.25	0	0.25	0.25	LAR	0	0	0	0	LDA
60	0	female	1	1	0	0	0.05	0	-0.05	0.05	LDA	0	0	0	0	LDA
76	19	female	1	1	0	0	0.25	0	0.25	0.25	LAR	0.25	0	0.25	0.25	LAR
63	1	female	1	1	0	0	0.1	0	-0.1	0.1	EVN	0	0	0	0	LDA
68	17	female	1	1	0	0	0	0.125	0.125	0.125	EVN	0	0	0	0	LDA
61	1	female	1	1	0	0	0	0	0	0	LDA	0	0	0	0	LDA
50	6	female	1	1	0	0	0.25	0	0.25	0.25	LAR	0	0	0	0	LDA
61	4	female	0	0	0	0	0	0	0	0	LDA	0	0	0	0	LDA
72	3	male	1	1	0	0	1.2	0	-0.2	1.2	EVN	0.1	0	-0.1	0.1	EVN
35	1	female	1	1	0	0	0	0.4	-0.4	0.4	SML	0	0.4	-0.4	0.4	SML
61	38	female	1	1	0	0	0.35	0.266667	0.216667	0.440013	LAR	0.5	0.125	0.625	0.515388	LAR
75	14	female	0	0	0	0	0	0	0	0	LDA	0	0	0	0	LDA
65	1	female	0	1	0	0	1.5	0.25	-0.25	1.52069	SML	0.2	0.125	-0.075	0.23585	EVN
70	15	female	1	1	1	1	0.875	0.25	1.125	0.910014	LAR	0.5	0.25	0.75	0.559017	LAR
50	1	male	1	1	0	0	0.15	0	-0.15	0.15	EVN	0	0	0	0	LDA
59	5	male	0	0	0	0	0	0	0	0	LDA	0	0	0	0	LDA
50	1	female	1	1	0	0	0	0.2	-0.2	0.2	SML	0	0	0	0	LDA
67	4	male	1	1	0	0	0.5	0	-0.5	0.5	SML	0	0	0	0	LDA
68	5	female	1	1	1	1	0.4	0	0.1	0.4	EVN	0.05	0	-0.05	0.05	LDA
69	0	female	0	0	0	0	0.3	0	-0.3	0.3	SML	0.05	0	-0.05	0.05	LDA
44	0	female	1	1	0	0	0.05	0.1	-0.15	0.111803	EVN	0	0	0	0	LDA
71	0	female	0	0	0	0	0.05	0	-0.05	0.05	LDA	0	0	0	0	LDA
51	0	female	1	1	0	0	0	0	0	0	LDA	0	0	0	0	LDA
76	1	male	0	0	0	0	0.5	0.291667	0.791667	0.578852	LAR	0	0.291667	0.291667	0.291667	LAR
55	1	female	1	1	0	1	0.25	0.45	-0.2	0.514782	SML	0.15	0.125	-0.025	0.195256	EVN
75	8	female	1	1	0	0	0.1	0	-0.1	0.1	EVN	0.125	0.266667	0.191667	0.29451	EVN
69	1	female	1	0	0	0	0.75	0.125	0.875	0.760345	LAR	0	0	0	0	LDA
59	7	female	1	1	0	0	0	0	0	0	LDA	0	0	0	0	LDA
61	1	male	1	1	0	0	0.1	0.166667	0.0666667	0.194365	EVN	0.05	0	-0.05	0.05	LDA
29	1	female	1	1	0	0	1.6	0.583333	-1.01667	1.70302	SML	0.65	0.25	0.1	0.696419	EVN
63	0	female	0	1	0	0	1.05	0.125	0.575	1.05741	LAR	0	0	0	0	LDA
54	0	male	1	1	0	0	0	0	0	0	LDA	0.1	0	-0.1	0.1	EVN
42	0	female	0	1	0	0	0.2	0	-0.2	0.2	SML	0	0	0	0	LDA
53	8	female	0	0	0	0	1.375	1.14167	0.316667	1.78718	LAR	0.45	0	0.05	0.45	EVN
69	0	female	1	1	0	0	0	0	0	0	LDA	0.1	0	-0.1	0.1	EVN
59	0	female	1	1	0	0	1.5	0.333333	-0.166667	1.53659	EVN	0.125	0	0.125	0.125	EVN
74	1	male	1	1	0	0	0.275	0.125	0.1	0.302076	EVN	0	0	0	0	LDA
56	0	female	1	1	0	0	0	0.125	0.125	0.125	EVN	0	0	0	0	LDA
62	1	male	1	1	0	0	0.25	0	-0.25	0.25	SML	0.25	0	-0.25	0.25	SML
46	0	female	0	1	0	0	2.55	2.83333	-2.21667	3.81186	SML	0	0	0	0	LDA
19	0	female	0	1	0	1	0.55	0.225	0.475	0.594243	LAR	0.125	0	0.125	0.125	EVN
66	3	female	0	0	0	0	0	0	0	0	LDA	0	0	0	0	LDA
68	19	female	1	1	0	0	1.475	0.291667	0.566667	1.50356	LAR	0.8	0.291667	0.991667	0.85151	LAR
87	0	female	0	0	0	0	0.4	0.333333	0.433333	0.520683	LAR	0.7	0.333333	0.633333	0.775314	LAR
24	1	female	1	1	0	0	1.05	0.25	-0.3	1.07935	SML	0.975	0.416667	0.191667	1.0603	EVN
45	5	female	1	1	1	1	0.25	0	0.25	0.25	LAR	0	0	0	0	LDA
56	3	male	1	0	0	0	0	0.25	0.25	0.25	LAR	1.05	0	-0.55	1.05	SML
63	0	male	0	1	0	0	1.8	0	-0.8	1.8	SML	0.125	0	0.125	0.125	EVN
57	5	male	1	1	0	0	0	0.291667	0.291667	0.291667	LAR	0	0.583333	0.583333	0.583333	LAR
65	0	male	1	1	0	0	0.05	0	-0.05	0.05	LDA	0	0	0	0	LDA
65	1	female	0	0	0	0	0.35	0	0.15	0.35	EVN	0.125	0	0.125	0.125	EVN
65	22	female	1	1	0	0	0.575	0	0.175	0.575	EVN	0.05	0	-0.05	0.05	LDA
68	1	female	0	1	0	0	0.55	0.25	0.7	0.604152	LAR	0.425	0.125	0.45	0.443001	LAR
30	8	female	1	1	0	1	1.05	0	-0.55	1.05	SML	1.325	0	-0.075	1.325	EVN
83	16	female	0	0	1	1	0.25	0.25	0.5	0.353553	LAR	0	0	0	0	LDA
36	0	female	0	1	0	1	0.9	0.125	0.225	0.908639	LAR	0	0	0	0	LDA
68	7	female	1	1	0	0	0.05	0.25	0.2	0.254951	EVN	0	0.125	0.125	0.125	EVN
39	1	female	0	1	0	1	0.325	0.1	-0.175	0.340037	EVN	0.1	0.1	-0.2	0.141421	SML
62	0	female	0	1	0	0	0	0.125	0.125	0.125	EVN	0.1	0	-0.1	0.1	EVN
47	2	female	1	1	0	0	0.25	0	-0.25	0.25	SML	0.1	0	-0.1	0.1	EVN
67	0	female	1	1	0	0	0.125	0	0.125	0.125	EVN	0	0	0	0	LDA
72	11	female	0	0	0	0	1.5	0	-0.5	1.5	SML	0.125	0	0.125	0.125	EVN
90	16	female	0	0	0	0	0.125	0.125	0.25	0.176777	LAR	0	0.125	0.125	0.125	EVN
53	0	female	0	1	0	0	0.5	0	0.5	0.5	LAR	0.15	1	-1.15	1.01119	SML
67	7	female	0	0	0	0	0.1	0	-0.1	0.1	EVN	0.2	0	-0.2	0.2	SML
82	8	female	0	0	0	0	0	0	0	0	LDA	0	0	0	0	LDA
79	6	male	0	0	1	1	0.275	0.2	-0.225	0.340037	SML	0.15	0	-0.15	0.15	EVN
63	6	female	1	1	1	0	0	0.125	0.125	0.125	EVN	0	0.125	0.125	0.125	EVN
78	8	female	0	0	0	0	0.125	0	0.125	0.125	EVN	0.25	0	0.25	0.25	LAR
70	32	female	0	0	0	0	0.7	0.333333	0.633333	0.775314	LAR	0.25	0	0.25	0.25	LAR
[truncated: 8,119 more rows]

## Sheet: Transformation matrix
All patients
	1.05685	0.350242	0.184125
	-0.486785	0.164956	-0.0900086
	-0.0684224	-0.0395831	0.422448
Disease duration < 10 years
	0.989593	0.38492	0.112493
	-0.513735	0.0319318	-0.0177472
	-0.0872462	-0.0548784	0.393716
Disease duration ≥ 10 years
	1.13927	0.331728	0.264615
	-0.495433	0.258478	-0.181759
	-0.0768574	-0.0444761	0.439576
MTX user
	1.05605	0.354575	0.122801
	-0.491113	0.167424	-0.0376284
	-0.0727283	-0.0453753	0.426115
MTX non-user
	1.06962	0.346325	0.365712
	-0.462274	0.173507	-0.304309
	-0.0621764	-0.0374402	0.414751
bDMARDs user
	1.04466	0.393928	0.310212
	-0.344691	0.228143	-0.222248
	-0.103543	-0.0590444	0.430766
Both MTX and bDMARDs user
	1.09073	0.431201	0.361228
	-0.446691	0.147593	-0.30962
	-0.0922481	-0.0624143	0.420024

## Sheet: mestimated vectors
Target patients			2015_X	2015_Y	2015_Z	eX	eY	eZ	e|Vxy|	predicted group		Target patients			eX	eY	eZ	e|Vxy|	predicted group		Target patients			eX	eY	eZ	e|Vxy|	predicted group		Target patients			eX	eY	eZ	e|Vxy|	predicted group		Target patients			eX	eY	eZ	e|Vxy|	predicted group		Target patients
All			0	0	0	0	0	0	0	LDA		All			0	0	0	0	LDA		All			0	0	0	0	LDA		All			0	0	0	0	LDA		All			0	0	0	0	LDA		Disease duration < 10 years
Transformation matrix			0	0	0	0	0	0	0	LDA		Transformation matrix			0	0	0	0	LDA		Transformation matrix			0	0	0	0	LDA		Transformation matrix			0	0	0	0	LDA		Transformation matrix			0	0	0	0	LDA		Transformation matrix
All			0	0	0	0	0	0	0	LDA		Disease duration < 10 years			0	0	0	0	LDA		Disease duration ≥ 10 years			0	0	0	0	LDA		MTX user			0	0	0	0	LDA		MTX non-user			0	0	0	0	LDA		All
1.05685	0.350242	0.184125	0	0	0	0	0	0	0	LDA		0.989593	0.38492	0.112493	0	0	0	0	LDA		1.13927	0.331728	0.264615	0	0	0	0	LDA		1.05605	0.354575	0.122801	0	0	0	0	LDA		1.06962	0.346325	0.365712	0	0	0	0	LDA		1.05685	0.350242
-0.486785	0.164956	-0.0900086	0	0	0	0	0	0	0	LDA		-0.513735	0.0319318	-0.0177472	0	0	0	0	LDA		-0.495433	0.258478	-0.181759	0	0	0	0	LDA		-0.491113	0.167424	-0.0376284	0	0	0	0	LDA		-0.462274	0.173507	-0.304309	0	0	0	0	LDA		-0.486785	0.164956
-0.0684224	-0.0395831	0.422448	0	0.4	-0.4	-0.167345	0.0818155	-0.204983	0.186274	SML		-0.0872462	-0.0548784	0.393716	-0.170596	0.0347241	-0.164585	0.174094	EVN		-0.0768574	-0.0444761	0.439576	-0.16743	0.121182	-0.248534	0.206683	SML		-0.0727283	-0.0453753	0.426115	-0.167354	0.0851195	-0.185498	0.187757	EVN		-0.0621764	-0.0374402	0.414751	-0.160039	0.0843789	-0.287624	0.180921	SML		-0.0684224	-0.0395831
			0	0	0	0	0	0	0	LDA					0	0	0	0	LDA					0	0	0	0	LDA					0	0	0	0	LDA					0	0	0	0	LDA
			0	0	0	0	0	0	0	LDA					0	0	0	0	LDA					0	0	0	0	LDA					0	0	0	0	LDA					0	0	0	0	LDA
			0.125	0	0.125	0.123554	0.0388324	0.0758216	0.129513	EVN					0.112793	0.0412552	0.0632761	0.120101	EVN					0.132801	0.0359065	0.0880238	0.13757	EVN					0.122915	0.03865	0.0686146	0.128848	EVN					0.125931	0.0386107	0.0975579	0.131717	EVN
			0.225	0	0.025	0.236081	0.0778149	0.0519893	0.248575	EVN					0.220477	0.0852351	0.0351538	0.23638	EVN					0.254414	0.073527	0.0705278	0.264825	EVN					0.235793	0.078645	0.0382832	0.248562	EVN					0.239111	0.0769872	0.092654	0.251199	EVN
			0	0.25	0.25	-0.138802	0.0313431	0.0831098	0.142297	EVN					-0.150245	-0.00573665	0.0939922	0.150355	EVN					-0.143073	0.0535005	0.0644541	0.152748	EVN					-0.14096	0.0305121	0.0971217	0.144225	EVN					-0.131113	0.0340167	0.0276105	0.135454	EVN
			0.55	0	0.45	0.550479	0.174821	0.29137	0.577572	LAR					0.505016	0.187011	0.239043	0.538529	LAR					0.592011	0.162436	0.343347	0.613891	LAR					0.548098	0.174597	0.259293	0.575236	LAR					0.560314	0.173631	0.38778	0.5866	LAR
			0	0	0	0	0	0	0	LDA					0	0	0	0	LDA					0	0	0	0	LDA					0	0	0	0	LDA					0	0	0	0	LDA
			0.325	0	-0.075	0.348609	0.116797	0.028157	0.367655	EVN					0.328161	0.129215	0.00703152	0.352685	EVN					0.376026	0.111147	0.0530317	0.392109	EVN					0.34867	0.11864	0.00795179	0.368302	EVN					0.352291	0.115364	0.0877501	0.370699	EVN
			0.4	0	-0.4	0.45011	0.15593	-0.0953292	0.476354	EVN					0.430736	0.175919	-0.112489	0.465275	EVN					0.48645	0.150482	-0.0699842	0.509194	EVN					0.45151	0.15998	-0.121326	0.479015	EVN					0.45272	0.153506	-0.0196157	0.478038	EVN
			0.2	0	-0.2	0.225055	0.0779651	-0.0476646	0.238177	EVN					0.215368	0.0879597	-0.0562446	0.232638	EVN					0.243225	0.0752409	-0.0349921	0.254597	EVN					0.225755	0.07999	-0.0606628	0.239507	EVN					0.22636	0.0767531	-0.00980783	0.239019	EVN
			0	0	0	0	0	0	0	LDA					0	0	0	0	LDA					0	0	0	0	LDA					0	0	0	0	LDA					0	0	0	0	LDA
			0	0	0	0	0	0	0	LDA					0	0	0	0	LDA					0	0	0	0	LDA					0	0	0	0	LDA					0	0	0	0	LDA
			0	0	0	0	0	0	0	LDA					0	0	0	0	LDA					0	0	0	0	LDA					0	0	0	0	LDA					0	0	0	0	LDA
			0	0	0	0	0	0	0	LDA					0	0	0	0	LDA					0	0	0	0	LDA					0	0	0	0	LDA					0	0	0	0	LDA
			0	0.3	-0.3	-0.125509	0.0613616	-0.153737	0.139706	EVN					-0.127947	0.026043	-0.123439	0.13057	EVN					-0.125573	0.0908862	-0.1864	0.155012	EVN					-0.125515	0.0638397	-0.139123	0.140818	EVN					-0.120029	0.0632842	-0.215718	0.135691	SML
			0.1	0	-0.1	0.112528	0.0389825	-0.0238323	0.119089	EVN					0.107684	0.0439799	-0.0281223	0.116319	EVN					0.121612	0.0376204	-0.0174961	0.127298	EVN					0.112878	0.039995	-0.0303314	0.119754	EVN					0.11318	0.0383766	-0.00490391	0.119509	EVN
			0.125	0	0.125	0.123554	0.0388324	0.0758216	0.129513	EVN					0.112793	0.0412552	0.0632761	0.120101	EVN					0.132801	0.0359065	0.0880238	0.13757	EVN					0.122915	0.03865	0.0686146	0.128848	EVN					0.125931	0.0386107	0.0975579	0.131717	EVN
			0	0	0	0	0	0	0	LDA					0	0	0	0	LDA					0	0	0	0	LDA					0	0	0	0	LDA					0	0	0	0	LDA
			0.3	0	-0.3	0.337583	0.116948	-0.0714969	0.357266	EVN					0.323052	0.13194	-0.0843669	0.348956	EVN					0.364837	0.112861	-0.0524882	0.381895	EVN					0.338633	0.119985	-0.0909942	0.359261	EVN					0.33954	0.11513	-0.0147117	0.358528	EVN
			0	0	0	0	0	0	0	LDA					0	0	0	0	LDA					0	0	0	0	LDA					0	0	0	0	LDA					0	0	0	0	LDA
			0	0	0	0	0	0	0	LDA					0	0	0	0	LDA					0	0	0	0	LDA					0	0	0	0	LDA					0	0	0	0	LDA
			0	1	-1	-0.418363	0.204539	-0.512456	0.465686	SML					-0.426489	0.0868102	-0.411463	0.435235	SML					-0.418576	0.302954	-0.621335	0.516707	SML					-0.418385	0.212799	-0.463744	0.469392	SML					-0.400098	0.210947	-0.71906	0.452302	SML
			0	0	0	0	0	0	0	LDA					0	0	0	0	LDA					0	0	0	0	LDA					0	0	0	0	LDA					0	0	0	0	LDA
			0	0	0	0	0	0	0	LDA					0	0	0	0	LDA					0	0	0	0	LDA					0	0	0	0	LDA					0	0	0	0	LDA
			0	0	0	0	0	0	0	LDA					0	0	0	0	LDA					0	0	0	0	LDA					0	0	0	0	LDA					0	0	0	0	LDA
			0	0	0	0	0	0	0	LDA					0	0	0	0	LDA					0	0	0	0	LDA					0	0	0	0	LDA					0	0	0	0	LDA
			0.05	0.25	0.2	-0.0825381	0.0508344	0.0711936	0.0969364	LDA					-0.0964034	0.0162533	0.0799311	0.097764	LDA					-0.0822664	0.0723107	0.0557061	0.109529	EVN					-0.0845215	0.0505096	0.081956	0.0984637	LDA					-0.0745227	0.053205	0.0251585	0.0915664	LDA
			0	0	0	0	0	0	0	LDA					0	0	0	0	LDA					0	0	0	0	LDA					0	0	0	0	LDA					0	0	0	0	LDA
			0.375	0.291667	0.166667	0.242937	0.172856	0.113202	0.298157	EVN					0.206717	0.144512	0.102628	0.252221	EVN					0.269914	0.192375	0.11948	0.331454	EVN					0.240655	0.174235	0.106095	0.297107	EVN					0.255916	0.174238	0.11751	0.3096	EVN
			0.725	0.25	0.275	0.625706	0.284279	0.227161	0.687258	LAR					0.565029	0.271959	0.185393	0.627072	EVN					0.680975	0.292892	0.267289	0.741291	LAR					0.622856	0.286445	0.196806	0.685566	EVN					0.642811	0.284167	0.30312	0.70282	LAR
			0.05	0	-0.05	0.0562638	0.0194913	-0.0119161	0.0595443	LDA					0.053842	0.0219899	-0.0140612	0.0581594	LDA					0.0608062	0.0188102	-0.00874803	0.0636492	LDA					0.0564388	0.0199975	-0.0151657	0.0598769	LDA					0.0565901	0.0191883	-0.00245196	0.0597547	LDA
			0	0	0	0	0	0	0	LDA					0	0	0	0	LDA					0	0	0	0	LDA					0	0	0	0	LDA					0	0	0	0	LDA
			0	0	0	0	0	0	0	LDA					0	0	0	0	LDA					0	0	0	0	LDA					0	0	0	0	LDA					0	0	0	0	LDA
			0	0.125	0.125	-0.069401	0.0156716	0.0415549	0.0711484	LDA					-0.0751227	-0.00286833	0.0469961	0.0751774	LDA					-0.0715363	0.0267502	0.032227	0.0763742	LDA					-0.0704801	0.015256	0.0485609	0.0721124	LDA					-0.0655564	0.0170084	0.0138052	0.0677268	LDA
			0	0.375	0.375	-0.208203	0.0470147	0.124665	0.213445	EVN					-0.225368	-0.00860498	0.140988	0.225532	EVN					-0.214609	0.0802507	0.0966811	0.229123	EVN					-0.21144	0.0457681	0.145683	0.216337	EVN					-0.196669	0.0510251	0.0414157	0.20318	EVN
			0.125	0	0.125	0.123554	0.0388324	0.0758216	0.129513	EVN					0.112793	0.0412552	0.0632761	0.120101	EVN					0.132801	0.0359065	0.0880238	0.13757	EVN					0.122915	0.03865	0.0686146	0.128848	EVN					0.125931	0.0386107	0.0975579	0.131717	EVN
			0	0.25	0.25	-0.138802	0.0313431	0.0831098	0.142297	EVN					-0.150245	-0.00573665	0.0939922	0.150355	EVN					-0.143073	0.0535005	0.0644541	0.152748	EVN					-0.14096	0.0305121	0.0971217	0.144225	EVN					-0.131113	0.0340167	0.0276105	0.135454	EVN
			0	0	0	0	0	0	0	LDA					0	0	0	0	LDA					0	0	0	0	LDA					0	0	0	0	LDA					0	0	0	0	LDA
			0.675	0	0.075	0.708244	0.233445	0.155968	0.745726	EVN					0.661432	0.255705	0.105461	0.709139	EVN					0.763241	0.220581	0.211583	0.794476	LAR					0.707378	0.235935	0.11485	0.745686	EVN					0.717333	0.230962	0.277962	0.753598	LAR
			1.6	0.25	0.15	1.55901	0.595689	0.335465	1.66894	LAR					1.44183	0.615624	0.234609	1.56776	LAR					1.68744	0.588714	0.44388	1.78719	LAR					1.55599	0.60237	0.250992	1.66852	LAR					1.5865	0.591881	0.571275	1.69332	LAR
			0.925	0.291667	0.116667	0.827628	0.367468	0.193349	0.905539	EVN					0.755356	0.358962	0.144813	0.836311	EVN					0.900354	0.377049	0.24304	0.976116	LAR					0.825118	0.37152	0.15233	0.904901	EVN					0.847319	0.366589	0.297914	0.923221	LAR
			0.1	0.125	0.025	0.0431266	0.0546541	0.0177226	0.0696202	LDA					0.0325613	0.0411115	0.0188738	0.0524442	LDA					0.0500761	0.0643707	0.014731	0.0815549	LDA					0.0423975	0.0552511	0.0182295	0.0696435	LDA					0.0476237	0.0553849	0.00890133	0.0730446	LDA
			0	0	0	0	0	0	0	LDA					0	0	0	0	LDA					0	0	0	0	LDA					0	0	0	0	LDA					0	0	0	0	LDA
			0.925	0.416667	0.741667	0.724016	0.363348	0.446127	0.810074	LAR					0.63661	0.328655	0.388667	0.71644	LAR					0.790389	0.381562	0.495054	0.87767	LAR					0.718274	0.364088	0.413948	0.805281	LAR					0.750674	0.364877	0.519095	0.834654	LAR
			0.35	0	0.15	0.359635	0.116647	0.127811	0.37808	EVN					0.333271	0.12649	0.09843	0.356468	EVN					0.387215	0.109434	0.158552	0.402382	EVN					0.358707	0.117295	0.106898	0.377398	EVN					0.365042	0.115598	0.190212	0.382908	EVN
			0	0.125	0.125	-0.069401	0.0156716	0.0415549	0.0711484	LDA					-0.0751227	-0.00286833	0.0469961	0.0751774	LDA					-0.0715363	0.0267502	0.032227	0.0763742	LDA					-0.0704801	0.015256	0.0485609	0.0721124	LDA					-0.0655564	0.0170084	0.0138052	0.0677268	LDA
			0	0	0	0	0	0	0	LDA					0	0	0	0	LDA					0	0	0	0	LDA					0	0	0	0	LDA					0	0	0	0	LDA
			0.725	0	-0.475	0.798719	0.272728	-0.0671722	0.843998	EVN					0.758897	0.305134	-0.105458	0.817944	EVN					0.862476	0.261629	-0.0169525	0.901285	EVN					0.80018	0.27862	-0.113374	0.8473	EVN					0.805012	0.26887	0.0681344	0.848725	EVN
			0.225	0	0.025	0.236081	0.0778149	0.0519893	0.248575	EVN					0.220477	0.0852351	0.0351538	0.23638	EVN					0.254414	0.073527	0.0705278	0.264825	EVN					0.235793	0.078645	0.0382832	0.248562	EVN					0.239111	0.0769872	0.092654	0.251199	EVN
			0.125	0.1	0.025	0.0817176	0.0592863	0.0245759	0.100959	EVN					0.0701445	0.0499363	0.0221298	0.0861039	LDA					0.0909436	0.0662019	0.0258903	0.112488	EVN					0.0810765	0.0599298	0.0222402	0.100822	EVN					0.0859212	0.0597054	0.0256519	0.104629	EVN
			0	0.25	0.25	-0.138802	0.0313431	0.0831098	0.142297	EVN					-0.150245	-0.00573665	0.0939922	0.150355	EVN					-0.143073	0.0535005	0.0644541	0.152748	EVN					-0.14096	0.0305121	0.0971217	0.144225	EVN					-0.131113	0.0340167	0.0276105	0.135454	EVN
			0	0.125	0.125	-0.069401	0.0156716	0.0415549	0.0711484	LDA					-0.0751227	-0.00286833	0.0469961	0.0751774	LDA					-0.0715363	0.0267502	0.032227	0.0763742	LDA					-0.0704801	0.015256	0.0485609	0.0721124	LDA					-0.0655564	0.0170084	0.0138052	0.0677268	LDA
			0	0	0	0	0	0	0	LDA					0	0	0	0	LDA					0	0	0	0	LDA					0	0	0	0	LDA					0	0	0	0	LDA
			0	0.125	0.125	-0.069401	0.0156716	0.0415549	0.0711484	LDA					-0.0751227	-0.00286833	0.0469961	0.0751774	LDA					-0.0715363	0.0267502	0.032227	0.0763742	LDA					-0.0704801	0.015256	0.0485609	0.0721124	LDA					-0.0655564	0.0170084	0.0138052	0.0677268	LDA
			0.25	0	0.25	0.247108	0.0776648	0.151643	0.259025	EVN					0.225587	0.0825105	0.126552	0.240203	EVN					0.265602	0.0718131	0.176048	0.275139	EVN					0.24583	0.0772999	0.137229	0.257697	EVN					0.251862	0.0772213	0.195116	0.263434	EVN
			0.1	0	-0.1	0.112528	0.0389825	-0.0238323	0.119089	EVN					0.107684	0.0439799	-0.0281223	0.116319	EVN					0.121612	0.0376204	-0.0174961	0.127298	EVN					0.112878	0.039995	-0.0303314	0.119754	EVN					0.11318	0.0383766	-0.00490391	0.119509	EVN
			0.1	0.8	-0.9	-0.222163	0.202613	-0.433797	0.30068	SML					-0.233507	0.113428	-0.357293	0.259599	SML					-0.213248	0.279984	-0.514564	0.351945	SML					-0.22183	0.210234	-0.401326	0.305626	SML					-0.206898	0.207134	-0.580152	0.292765	SML
			0.65	0.25	0.1	0.558416	0.264938	0.139424	0.618078	EVN					0.506077	0.252693	0.108055	0.565657	EVN					0.60898	0.275795	0.170517	0.66852	EVN					0.55638	0.267792	0.113025	0.617472	EVN					0.57347	0.264744	0.203111	0.63163	LAR
			0.55	1.25	-0.3	-0.00668539	0.410703	-0.137976	0.410757	EVN					-0.0717191	0.268084	-0.0784276	0.277512	EVN					0.0303628	0.518891	-0.213533	0.519778	SML					-0.0112464	0.417908	-0.107329	0.41806	EVN					0.0291034	0.418595	-0.30367	0.419605	SML
			0.575	1.125	-0.7	0.107953	0.414672	-0.291101	0.428494	SML					0.0521362	0.295667	-0.230883	0.300229	SML					0.151517	0.512665	-0.360028	0.534586	SML					0.105635	0.423995	-0.270002	0.436956	SML					0.138499	0.420541	-0.422389	0.44276	SML
			0.5	0.833333	1.33333	0.0315426	0.259807	0.580319	0.261714	LAR					-0.0496445	0.145899	0.566412	0.154114	LAR					0.0542961	0.321961	0.566942	0.326507	LAR					0.0217921	0.256307	0.598197	0.257232	LAR					0.0666816	0.267832	0.482267	0.276008	LAR
			0	0.125	0.125	-0.069401	0.0156716	0.0415549	0.0711484	LDA					-0.0751227	-0.00286833	0.0469961	0.0751774	LDA					-0.0715363	0.0267502	0.032227	0.0763742	LDA					-0.0704801	0.015256	0.0485609	0.0721124	LDA					-0.0655564	0.0170084	0.0138052	0.0677268	LDA
			1.7	0.5	0.3	1.53273	0.666015	0.394742	1.67118	LAR					1.39927	0.653867	0.300479	1.5445	LAR					1.66598	0.679834	0.490838	1.79935	LAR					1.52791	0.672877	0.317783	1.66951	LAR					1.56857	0.664275	0.593981	1.70343	LAR
			0.275	1.25	-0.775	-0.264819	0.333188	-0.389273	0.42561	SML					-0.302415	0.188299	-0.296378	0.356246	SML					-0.246428	0.448792	-0.495101	0.511997	SML					-0.267114	0.341953	-0.343505	0.433915	SML					-0.23551	0.34114	-0.601248	0.414537	SML
			0.15	0	-0.15	0.168791	0.0584738	-0.0357484	0.178633	EVN					0.161526	0.0659698	-0.0421835	0.174478	EVN					0.182419	0.0564307	-0.0262441	0.190948	EVN					0.169316	0.0599925	-0.0454971	0.179631	EVN					0.16977	0.0575649	-0.00735587	0.179264	EVN
			0	0	0	0	0	0	0	LDA					0	0	0	0	LDA					0	0	0	0	LDA					0	0	0	0	LDA					0	0	0	0	LDA
			0	0	0	0	0	0	0	LDA					0	0	0	0	LDA					0	0	0	0	LDA					0	0	0	0	LDA					0	0	0	0	LDA
			0.25	1.25	-0.5	-0.310057	0.313547	-0.277703	0.440961	SML					-0.351148	0.163584	-0.190919	0.387382	EVN					-0.296046	0.428268	-0.380833	0.520631	SML					-0.313515	0.320611	-0.229393	0.448423	SML					-0.279349	0.322185	-0.496334	0.426426	SML
			0.8	0.166667	0.866667	0.705053	0.273381	0.49842	0.756199	LAR					0.630439	0.265697	0.428257	0.68414	LAR					0.762232	0.269916	0.562364	0.808611	LAR					0.699955	0.272239	0.46127	0.751033	LAR					0.724768	0.27353	0.601302	0.774666	LAR
			0.4	0.25	-0.15	0.311308	0.187273	-0.0122194	0.363296	EVN					0.28049	0.170183	-0.018497	0.328081	EVN					0.343377	0.203982	-0.00553014	0.399395	EVN					0.31055	0.190492	-0.0242039	0.364319	EVN					0.321608	0.187523	0.00799484	0.372285	EVN
			0	0	0	0	0	0	0	LDA					0	0	0	0	LDA					0	0	0	0	LDA					0	0	0	0	LDA					0	0	0	0	LDA
			0	0	0	0	0	0	0	LDA					0	0	0	0	LDA					0	0	0	0	LDA					0	0	0	0	LDA					0	0	0	0	LDA
			0.25	0	0.25	0.247108	0.0776648	0.151643	0.259025	EVN					0.225587	0.0825105	0.126552	0.240203	EVN					0.265602	0.0718131	0.176048	0.275139	EVN					0.24583	0.0772999	0.137229	0.257697	EVN					0.251862	0.0772213	0.195116	0.263434	EVN
			0.05	0	-0.05	0.0562638	0.0194913	-0.0119161	0.0595443	LDA					0.053842	0.0219899	-0.0140612	0.0581594	LDA					0.0608062	0.0188102	-0.00874803	0.0636492	LDA					0.0564388	0.0199975	-0.0151657	0.0598769	LDA					0.0565901	0.0191883	-0.00245196	0.0597547	LDA
			0.4	0.125	0.225	0.346498	0.15181	0.15745	0.378295	EVN					0.31199	0.145612	0.131365	0.344297	EVN					0.376485	0.154994	0.182031	0.407141	EVN					0.344666	0.152549	0.140293	0.376916	EVN					0.356076	0.151795	0.201565	0.387081	LAR
			0.05	0	-0.05	0.0562638	0.0194913	-0.0119161	0.0595443	LDA					0.053842	0.0219899	-0.0140612	0.0581594	LDA					0.0608062	0.0188102	-0.00874803	0.0636492	LDA					0.0564388	0.0199975	-0.0151657	0.0598769	LDA					0.0565901	0.0191883	-0.00245196	0.0597547	LDA
			0.475	0	0.275	0.483189	0.15548	0.203632	0.507588	LAR					0.446064	0.167746	0.161706	0.476563	EVN					0.520016	0.14534	0.246575	0.539945	LAR					0.481622	0.155945	0.175512	0.50624	EVN					0.490973	0.154209	0.28777	0.514621	LAR
			0.25	0.541667	0.791667	-0.0536297	0.145575	0.331714	0.155139	LAR					-0.0999449	0.0700811	0.330202	0.122067	LAR					-0.0443882	0.187731	0.315698	0.192907	LAR					-0.0595841	0.143409	0.34766	0.155295	LAR					-0.0322156	0.150924	0.254939	0.154324	LAR
			0	0	0	0	0	0	0	LDA					0	0	0	0	LDA					0	0	0	0	LDA					0	0	0	0	LDA					0	0	0	0	LDA
			0.4	0	0.1	0.415899	0.136139	0.115895	0.437614	EVN					0.387113	0.14848	0.0843688	0.414611	EVN					0.448021	0.128244	0.149804	0.466014	EVN					0.415146	0.137292	0.0917321	0.437259	EVN					0.421632	0.134786	0.18776	0.442652	EVN
			0	0	0	0	0	0	0	LDA					0	0	0	0	LDA					0	0	0	0	LDA					0	0	0	0	LDA					0	0	0	0	LDA
			1.05	0	-0.05	1.11312	0.369734	0.172209	1.17292	EVN					1.04344	0.40691	0.0984318	1.11997	EVN					1.20007	0.350539	0.255867	1.25022	LAR					1.11249	0.374572	0.107636	1.17385	EVN					1.12621	0.365514	0.36326	1.18404	LAR
			1.55	0.583333	0.0333333	1.35188	0.63778	0.24697	1.49478	LAR					1.23128	0.613424	0.177136	1.37563	EVN					1.4743	0.663475	0.318779	1.61671	LAR					1.34797	0.645742	0.182596	1.49466	EVN					1.38619	0.636769	0.403165	1.52545	LAR
			0.275	0.5	-0.525	0.0831639	0.199576	-0.216155	0.21621	SML					0.0610747	0.15063	-0.184639	0.162541	EVN					0.105932	0.243814	-0.248888	0.265833	SML					0.083039	0.205042	-0.208754	0.221219	SML					0.0956522	0.201649	-0.269328	0.223185	SML
			0.1	0.2	-0.3	0.028855	0.0798903	-0.126324	0.0849416	LDA					0.0223861	0.0613419	-0.110415	0.0652991	LDA					0.0378973	0.0982113	-0.141763	0.105269	EVN					0.0292007	0.0825548	-0.12308	0.087567	LDA					0.0331605	0.080566	-0.148716	0.0871235	LDA
			0.175	0	0.075	0.179818	0.0583237	0.0639054	0.18904	EVN					0.166635	0.0632452	0.049215	0.178234	EVN					0.193607	0.0547168	0.0792758	0.201191	EVN					0.179354	0.0586475	0.0534489	0.188699	EVN					0.182521	0.0577989	0.0951059	0.191454	EVN
			0.05	1	-1.05	-0.362099	0.22403	-0.524373	0.425799	SML					-0.372647	0.1088	-0.425524	0.388205	SML					-0.357769	0.321764	-0.630083	0.481177	SML					-0.361946	0.232796	-0.478909	0.430347	SML					-0.343508	0.230136	-0.721512	0.413473	SML
			0.225	0	0.025	0.236081	0.0778149	0.0519893	0.248575	EVN					0.220477	0.0852351	0.0351538	0.23638	EVN					0.254414	0.073527	0.0705278	0.264825	EVN					0.235793	0.078645	0.0382832	0.248562	EVN					0.239111	0.0769872	0.092654	0.251199	EVN
			0.05	0	-0.05	0.0562638	0.0194913	-0.0119161	0.0595443	LDA					0.053842	0.0219899	-0.0140612	0.0581594	LDA					0.0608062	0.0188102	-0.00874803	0.0636492	LDA					0.0564388	0.0199975	-0.0151657	0.0598769	LDA					0.0565901	0.0191883	-0.00245196	0.0597547	LDA
			0	0	0	0	0	0	0	LDA					0	0	0	0	LDA					0	0	0	0	LDA					0	0	0	0	LDA					0	0	0	0	LDA
			0	0.125	0.125	-0.069401	0.0156716	0.0415549	0.0711484	LDA					-0.0751227	-0.00286833	0.0469961	0.0751774	LDA					-0.0715363	0.0267502	0.032227	0.0763742	LDA					-0.0704801	0.015256	0.0485609	0.0721124	LDA					-0.0655564	0.0170084	0.0138052	0.0677268	LDA
			0	0	0	0	0	0	0	LDA					0	0	0	0	LDA					0	0	0	0	LDA					0	0	0	0	LDA					0	0	0	0	LDA
			0.85	0.25	-0.1	0.783471	0.342903	0.0917592	0.855225	EVN					0.721445	0.340653	0.0518106	0.797827	EVN					0.852204	0.351036	0.135525	0.921672	EVN					0.782135	0.347782	0.0523625	0.855972	EVN					0.79983	0.341497	0.193303	0.869683	EVN
			0	0	0	0	0	0	0	LDA					0	0	0	0	LDA					0	0	0	0	LDA					0	0	0	0	LDA					0	0	0	0	LDA
			0	0	0	0	0	0	0	LDA					0	0	0	0	LDA					0	0	0	0	LDA					0	0	0	0	LDA					0	0	0	0	LDA
			0	0	0	0	0	0	0	LDA					0	0	0	0	LDA					0	0	0	0	LDA					0	0	0	0	LDA					0	0	0	0	LDA
			1.5	0.25	-0.25	1.48069	0.576498	0.148073	1.58896	EVN					1.37777	0.599083	0.0658737	1.50238	EVN					1.60426	0.573331	0.241589	1.70363	LAR					1.47948	0.585062	0.0682661	1.59096	EVN					1.50441	0.572225	0.368803	1.60956	LAR
			0.85	0.25	-0.1	0.783471	0.342903	0.0917592	0.855225	EVN					0.721445	0.340653	0.0518106	0.797827	EVN					0.852204	0.351036	0.135525	0.921672	EVN					0.782135	0.347782	0.0523625	0.855972	EVN					0.79983	0.341497	0.193303	0.869683	EVN
			0.3	1	-0.8	-0.114991	0.301695	-0.372729	0.322866	SML					-0.14706	0.191311	-0.298972	0.241302	SML					-0.0921669	0.393577	-0.454035	0.404225	SML					-0.116116	0.310096	-0.34168	0.331123	SML					-0.0916459	0.307357	-0.526396	0.320729	SML
			0.125	0	0.125	0.123554	0.0388324	0.0758216	0.129513	EVN					0.112793	0.0412552	0.0632761	0.120101	EVN					0.132801	0.0359065	0.0880238	0.13757	EVN					0.122915	0.03865	0.0686146	0.128848	EVN					0.125931	0.0386107	0.0975579	0.131717	EVN
			0	0	0	0	0	0	0	LDA					0	0	0	0	LDA					0	0	0	0	LDA					0	0	0	0	LDA					0	0	0	0	LDA
			0	0	0	0	0	0	0	LDA					0	0	0	0	LDA					0	0	0	0	LDA					0	0	0	0	LDA					0	0	0	0	LDA
			2.15	1.5	-1.15	1.62074	1.04597	-0.224959	1.92896	SML					1.45736	0.938586	-0.237534	1.73344	SML					1.79466	1.15208	-0.209228	2.13263	SML					1.61747	1.06565	-0.282452	1.93696	SML					1.67778	1.04792	-0.147147	1.97815	EVN
			0	0	0	0	0	0	0	LDA					0	0	0	0	LDA					0	0	0	0	LDA					0	0	0	0	LDA					0	0	0	0	LDA
			0.225	1	-0.975	-0.182281	0.282354	-0.460467	0.33608	SML					-0.206012	0.172045	-0.376309	0.268404	SML					-0.164162	0.376481	-0.550807	0.410715	SML					-0.182592	0.291444	-0.425461	0.343918	SML					-0.160987	0.287935	-0.626406	0.329883	SML
			0	0	0	0	0	0	0	LDA					0	0	0	0	LDA					0	0	0	0	LDA					0	0	0	0	LDA					0	0	0	0	LDA
			0	0.125	0.125	-0.069401	0.0156716	0.0415549	0.0711484	LDA					-0.0751227	-0.00286833	0.0469961	0.0751774	LDA					-0.0715363	0.0267502	0.032227	0.0763742	LDA					-0.0704801	0.015256	0.0485609	0.0721124	LDA					-0.0655564	0.0170084	0.0138052	0.0677268	LDA
			0.25	0	0.25	0.247108	0.0776648	0.151643	0.259025	EVN					0.225587	0.0825105	0.126552	0.240203	EVN					0.265602	0.0718131	0.176048	0.275139	EVN					0.24583	0.0772999	0.137229	0.257697	EVN					0.251862	0.0772213	0.195116	0.263434	EVN
			0	0	0	0	0	0	0	LDA					0	0	0	0	LDA					0	0	0	0	LDA					0	0	0	0	LDA					0	0	0	0	LDA
			0.225	0	0.025	0.236081	0.0778149	0.0519893	0.248575	EVN					0.220477	0.0852351	0.0351538	0.23638	EVN					0.254414	0.073527	0.0705278	0.264825	EVN					0.235793	0.078645	0.0382832	0.248562	EVN					0.239111	0.0769872	0.092654	0.251199	EVN
			0.5	0.225	0.525	0.382978	0.191455	0.293596	0.428168	LAR					0.333402	0.170834	0.258954	0.374621	LAR					0.417811	0.200672	0.322189	0.463503	LAR					0.379341	0.191136	0.276645	0.424774	LAR					0.398158	0.192546	0.332131	0.442271	LAR
			0.7	0	-0.2	0.753482	0.253086	0.0443978	0.794851	EVN					0.710165	0.28042	1.89106e-06	0.763524	EVN					0.812858	0.241105	0.0973154	0.847862	EVN					0.753779	0.257278	0.00073788	0.796476	EVN					0.761172	0.249916	0.173048	0.80115	EVN
			0.95	0.583333	0.133333	0.71093	0.423676	0.17874	0.827601	EVN					0.628802	0.376984	0.149011	0.73315	EVN					0.783053	0.459991	0.203968	0.908165	LAR					0.707066	0.42846	0.151527	0.826753	EVN					0.738193	0.42523	0.225213	0.851909	LAR
			0	0	0	0	0	0	0	LDA					0	0	0	0	LDA					0	0	0	0	LDA					0	0	0	0	LDA					0	0	0	0	LDA
			0.1	0	-0.1	0.112528	0.0389825	-0.0238323	0.119089	EVN					0.107684	0.0439799	-0.0281223	0.116319	EVN					0.121612	0.0376204	-0.0174961	0.127298	EVN					0.112878	0.039995	-0.0303314	0.119754	EVN					0.11318	0.0383766	-0.00490391	0.119509	EVN
			0	0	0	0	0	0	0	LDA					0	0	0	0	LDA					0	0	0	0	LDA					0	0	0	0	LDA					0	0	0	0	LDA
			0	0	0	0	0	0	0	LDA					0	0	0	0	LDA					0	0	0	0	LDA					0	0	0	0	LDA					0	0	0	0	LDA
			1.3	0	0.2	1.36023	0.447398	0.323852	1.43191	LAR					1.26902	0.489421	0.224984	1.36013	LAR					1.46568	0.422352	0.431915	1.52531	LAR					1.35832	0.451872	0.244865	1.43151	LAR					1.37808	0.442735	0.558376	1.44745	LAR
			0	0	0	0	0	0	0	LDA					0	0	0	0	LDA					0	0	0	0	LDA					0	0	0	0	LDA					0	0	0	0	LDA
			0	0	0	0	0	0	0	LDA					0	0	0	0	LDA					0	0	0	0	LDA					0	0	0	0	LDA					0	0	0	0	LDA
			0	0.125	0.125	-0.069401	0.0156716	0.0415549	0.0711484	LDA					-0.0751227	-0.00286833	0.0469961	0.0751774	LDA					-0.0715363	0.0267502	0.032227	0.0763742	LDA					-0.0704801	0.015256	0.0485609	0.0721124	LDA					-0.0655564	0.0170084	0.0138052	0.0677268	LDA
			0	0	0	0	0	0	0	LDA					0	0	0	0	LDA					0	0	0	0	LDA					0	0	0	0	LDA					0	0	0	0	LDA
			0.375	0	0.375	0.370662	0.116497	0.227465	0.388538	LAR					0.33838	0.123766	0.189828	0.360304	EVN					0.398404	0.10772	0.264071	0.412709	LAR					0.368745	0.11595	0.205844	0.386545	LAR					0.377793	0.115832	0.292674	0.395151	LAR
			0	0	0	0	0	0	0	LDA					0	0	0	0	LDA					0	0	0	0	LDA					0	0	0	0	LDA					0	0	0	0	LDA
			0.15	1	-1.15	-0.249571	0.263012	-0.548205	0.362576	SML					-0.264963	0.15278	-0.453647	0.305855	SML					-0.236157	0.359385	-0.647579	0.430032	SML					-0.249068	0.272791	-0.509241	0.369392	SML					-0.230328	0.268512	-0.726416	0.353765	SML
			0.525	0	0.225	0.539453	0.174971	0.191716	0.567119	EVN					0.499906	0.189736	0.147645	0.534702	EVN					0.580822	0.16415	0.237827	0.603573	LAR					0.538061	0.175942	0.160347	0.566097	EVN					0.547563	0.173397	0.285318	0.574362	LAR
			0	0	0	0	0	0	0	LDA					0	0	0	0	LDA					0	0	0	0	LDA					0	0	0	0	LDA					0	0	0	0	LDA
			0	0	0	0	0	0	0	LDA					0	0	0	0	LDA					0	0	0	0	LDA					0	0	0	0	LDA					0	0	0	0	LDA
			0.175	0.125	0.2	0.110417	0.0739952	0.10546	0.132918	EVN					0.0915127	0.0603768	0.0962111	0.109635	EVN					0.122071	0.081467	0.111503	0.146759	EVN					0.108874	0.0739035	0.10201	0.131587	EVN					0.116965	0.0748073	0.108911	0.138841	EVN
			0.05	0.125	0.075	-0.0131372	0.0351628	0.0296387	0.0375368	LDA					-0.0212807	0.0191216	0.032935	0.0286095	LDA					-0.0107301	0.0455605	0.023479	0.0468069	LDA					-0.0140413	0.0352536	0.0333952	0.037947	LDA					-0.00896631	0.0361966	0.0113533	0.0372906	LDA
			0	0	0	0	0	0	0	LDA					0	0	0	0	LDA					0	0	0	0	LDA					0	0	0	0	LDA					0	0	0	0	LDA
			0	0	0	0	0	0	0	LDA					0	0	0	0	LDA					0	0	0	0	LDA					0	0	0	0	LDA					0	0	0	0	LDA
			0	0	0	0	0	0	0	LDA					0	0	0	0	LDA					0	0	0	0	LDA					0	0	0	0	LDA					0	0	0	0	LDA
			0.125	0.125	0.25	0.0541529	0.0545039	0.117376	0.0768324	LDA					0.0376707	0.0383869	0.110272	0.0537832	LDA					0.0612649	0.0626568	0.120251	0.0876314	LDA					0.0524348	0.053906	0.117175	0.0752015	LDA					0.0603747	0.055619	0.111363	0.0820888	LDA
			0	0	0	0	0	0	0	LDA					0	0	0	0	LDA					0	0	0	0	LDA					0	0	0	0	LDA					0	0	0	0	LDA
			0.775	0.541667	0.516667	0.520035	0.340337	0.312207	0.621503	LAR					0.443584	0.287256	0.280989	0.528472	LAR					0.574863	0.374119	0.333738	0.685881	LAR					0.514841	0.342039	0.294949	0.618104	LAR					0.546436	0.343041	0.332881	0.645189	LAR
			0	0	0	0	0	0	0	LDA					0	0	0	0	LDA					0	0	0	0	LDA					0	0	0	0	LDA					0	0	0	0	LDA
			0	0	0	0	0	0	0	LDA					0	0	0	0	LDA					0	0	0	0	LDA					0	0	0	0	LDA					0	0	0	0	LDA
			1.05	0.125	-0.425	1.07793	0.405197	0.0025397	1.15157	EVN					1.01194	0.431481	-0.0514301	1.10009	EVN					1.16697	0.399527	0.0683062	1.23346	EVN					1.07837	0.412516	-0.0568612	1.15458	EVN					1.09175	0.401242	0.16969	1.16314	EVN
			1.25	1	-1.75	0.954021	0.672029	-0.599136	1.16695	SML					0.875937	0.609119	-0.566134	1.06691	SML					1.06315	0.750972	-0.620248	1.30163	SML					0.956221	0.690049	-0.629829	1.17921	SML					0.983565	0.671934	-0.572984	1.19117	SML
			0	1	-1	-0.418363	0.204539	-0.512456	0.465686	SML					-0.426489	0.0868102	-0.411463	0.435234	SML					-0.418576	0.302954	-0.621335	0.516707	SML					-0.418385	0.212799	-0.463744	0.469392	SML					-0.400098	0.210947	-0.71906	0.452302	SML
			0	0	0	0	0	0	0	LDA					0	0	0	0	LDA					0	0	0	0	LDA					0	0	0	0	LDA					0	0	0	0	LDA
			0	0	0	0	0	0	0	LDA					0	0	0	0	LDA					0	0	0	0	LDA					0	0	0	0	LDA					0	0	0	0	LDA
			0.1	0	-0.1	0.112528	0.0389825	-0.0238323	0.119089	EVN					0.107684	0.0439799	-0.0281223	0.116319	EVN					0.121612	0.0376204	-0.0174961	0.127298	EVN					0.112878	0.039995	-0.0303314	0.119754	EVN					0.11318	0.0383766	-0.00490391	0.119509	EVN
			0.3	0.125	0.325	0.233971	0.112828	0.181282	0.259754	EVN					0.204306	0.101632	0.159487	0.228189	EVN					0.254872	0.117374	0.199527	0.2806	EVN					0.231788	0.112553	0.170624	0.257671	EVN					0.242896	0.113418	0.206469	0.268071	LAR
			0.775	0.625	0.1	0.507978	0.370577	0.128686	0.628784	EVN					0.437126	0.312783	0.115462	0.537505	EVN					0.565601	0.414191	0.135435	0.701041	EVN					0.504219	0.374898	0.114265	0.628319	EVN					0.53382	0.3731	0.134709	0.651281	EVN
			0.75	0	-0.25	0.809746	0.272577	0.0324817	0.854393	EVN					0.764007	0.30241	-0.0140593	0.82168	EVN					0.873665	0.259915	0.0885673	0.911507	EVN					0.810218	0.277275	-0.0144278	0.856349	EVN					0.817763	0.269104	0.170596	0.860902	EVN
			0.25	0	0.25	0.247108	0.0776648	0.151643	0.259025	EVN					0.225587	0.0825105	0.126552	0.240203	EVN					0.265602	0.0718131	0.176048	0.275139	EVN					0.24583	0.0772999	0.137229	0.257697	EVN					0.251862	0.0772213	0.195116	0.263434	EVN
			0.225	0.25	0.275	0.0972796	0.109158	0.135099	0.146215	EVN					0.0702319	0.0794985	0.129146	0.106078	EVN					0.111341	0.127027	0.134982	0.168917	EVN					0.0948322	0.109157	0.135405	0.144597	EVN					0.107998	0.111004	0.120264	0.154873	EVN
			0	0	0	0	0	0	0	LDA					0	0	0	0	LDA					0	0	0	0	LDA					0	0	0	0	LDA					0	0	0	0	LDA
			0	0	0	0	0	0	0	LDA					0	0	0	0	LDA					0	0	0	0	LDA					0	0	0	0	LDA					0	0	0	0	LDA
			0.3	0.291667	0.491667	0.141436	0.133723	0.236688	0.194643	LAR					0.104142	0.0978077	0.222149	0.142871	LAR					0.159491	0.153041	0.242496	0.22104	LAR					0.137815	0.132895	0.235372	0.191452	LAR					0.155487	0.136096	0.224876	0.206636	LAR
			0	0	0	0	0	0	0	LDA					0	0	0	0	LDA					0	0	0	0	LDA					0	0	0	0	LDA					0	0	0	0	LDA
			0	0	0	0	0	0	0	LDA					0	0	0	0	LDA					0	0	0	0	LDA					0	0	0	0	LDA					0	0	0	0	LDA
			0	0	0	0	0	0	0	LDA					0	0	0	0	LDA					0	0	0	0	LDA					0	0	0	0	LDA					0	0	0	0	LDA
			0.375	0.25	0.625	0.23186	0.14784	0.310575	0.274983	LAR					0.188135	0.118029	0.283821	0.222094	LAR					0.255331	0.16122	0.328526	0.30197	LAR					0.227784	0.146462	0.302965	0.270808	LAR					0.24668	0.149849	0.320284	0.288627	LAR
			0	0	0	0	0	0	0	LDA					0	0	0	0	LDA					0	0	0	0	LDA					0	0	0	0	LDA					0	0	0	0	LDA
			0.5	0.4	-0.9	0.395293	0.276728	-0.324144	0.48253	SML					0.367824	0.254623	-0.305197	0.447356	SML					0.440632	0.309284	-0.336014	0.538343	SML					0.397034	0.285095	-0.337155	0.488789	SML					0.405861	0.276262	-0.312144	0.490962	SML
			0	0	0	0	0	0	0	LDA					0	0	0	0	LDA					0	0	0	0	LDA					0	0	0	0	LDA					0	0	0	0	LDA
			0	0.125	0.125	-0.069401	0.0156716	0.0415549	0.0711484	LDA					-0.0751227	-0.00286833	0.0469961	0.0751774	LDA					-0.0715363	0.0267502	0.032227	0.0763742	LDA					-0.0704801	0.015256	0.0485609	0.0721124	LDA					-0.0655564	0.0170084	0.0138052	0.0677268	LDA
			0.05	0.125	0.075	-0.0131372	0.0351628	0.0296387	0.0375368	LDA					-0.0212807	0.0191216	0.032935	0.0286095	LDA					-0.0107301	0.0455605	0.023479	0.0468069	LDA					-0.0140413	0.0352536	0.0333952	0.037947	LDA					-0.00896631	0.0361966	0.0113533	0.0372906	LDA
			0.375	0.25	0.625	0.23186	0.14784	0.310575	0.274983	LAR					0.188135	0.118029	0.283821	0.222094	LAR					0.255331	0.16122	0.328526	0.30197	LAR					0.227784	0.146462	0.302965	0.270808	LAR					0.24668	0.149849	0.320284	0.288627	LAR
			0	0	0	0	0	0	0	LDA					0	0	0	0	LDA					0	0	0	0	LDA					0	0	0	0	LDA					0	0	0	0	LDA
			0.325	0.125	0.05	0.279208	0.132469	0.0697119	0.309039	EVN					0.253039	0.126347	0.0540276	0.282829	EVN					0.30449	0.137898	0.0852587	0.33426	EVN					0.27819	0.133896	0.0565127	0.308736	EVN					0.286735	0.132372	0.101555	0.315815	EVN
			0.2	0.125	-0.075	0.155654	0.0936366	-0.00610969	0.181648	EVN					0.140245	0.0850914	-0.0092485	0.16404	EVN					0.171689	0.101991	-0.00276507	0.199698	EVN					0.155275	0.0952461	-0.0121019	0.18216	EVN					0.160804	0.0937615	0.00399742	0.186143	EVN
			0	0	0	0	0	0	0	LDA					0	0	0	0	LDA					0	0	0	0	LDA					0	0	0	0	LDA					0	0	0	0	LDA
			0.575	0.35	-0.175	0.44929	0.266051	0.000440397	0.522154	EVN					0.404477	0.242109	-0.0104284	0.4714	EVN					0.495127	0.288994	0.0116122	0.573296	EVN					0.448065	0.27042	-0.0171294	0.523344	EVN					0.464119	0.266417	0.0311947	0.535149	EVN
			0.45	0	0.05	0.472163	0.15563	0.103979	0.49715	EVN					0.440955	0.17047	0.0703077	0.472759	EVN					0.508827	0.147054	0.141056	0.529651	EVN					0.471585	0.15729	0.0765664	0.497124	EVN					0.478222	0.153974	0.185308	0.502399	EVN
			0.35	0	0.15	0.359635	0.116647	0.127811	0.37808	EVN					0.333271	0.12649	0.09843	0.356468	EVN					0.387215	0.109434	0.158552	0.402382	EVN					0.358707	0.117295	0.106898	0.377398	EVN					0.365042	0.115598	0.190212	0.382908	EVN
			0	0	0	0	0	0	0	LDA					0	0	0	0	LDA					0	0	0	0	LDA					0	0	0	0	LDA					0	0	0	0	LDA
			0.15	0.25	0.1	0.0299895	0.0898169	0.0473613	0.0946913	LDA					0.0112805	0.0602332	0.0518088	0.0612804	LDA					0.0393461	0.109931	0.03821	0.11676	EVN					0.0283561	0.0905046	0.0516246	0.0948428	LDA					0.0386574	0.0915816	0.0202546	0.0994061	LDA
			0.25	0.25	0.5	0.108306	0.109008	0.234753	0.153665	LAR					0.0753414	0.0767738	0.220544	0.107566	LAR					0.12253	0.125314	0.240502	0.175263	LAR					0.10487	0.107812	0.234351	0.150403	LAR					0.120749	0.111238	0.222726	0.164178	LAR
			0.15	0.125	-0.025	0.0993904	0.0741454	0.00580645	0.124	EVN					0.0864032	0.0631015	0.00481265	0.106992	EVN					0.110882	0.0831809	0.00598296	0.138614	EVN					0.0988363	0.0752486	0.00306376	0.124221	EVN					0.104214	0.0745732	0.00644937	0.128147	EVN
			0	0	0	0	0	0	0	LDA					0	0	0	0	LDA					0	0	0	0	LDA					0	0	0	0	LDA					0	0	0	0	LDA
			0.125	0	0.125	0.123554	0.0388324	0.0758216	0.129513	EVN					0.112793	0.0412552	0.0632761	0.120101	EVN					0.132801	0.0359065	0.0880238	0.13757	EVN					0.122915	0.03865	0.0686146	0.128848	EVN					0.125931	0.0386107	0.0975579	0.131717	EVN
			0	0	0	0	0	0	0	LDA					0	0	0	0	LDA					0	0	0	0	LDA					0	0	0	0	LDA					0	0	0	0	LDA
			0.25	0.166667	0.416667	0.154573	0.0985602	0.20705	0.183322	LAR					0.125423	0.078686	0.189214	0.148062	EVN					0.170221	0.10748	0.219017	0.201313	LAR					0.151856	0.0976413	0.201977	0.180539	LAR					0.164454	0.0998991	0.213523	0.192418	LAR
			0.725	0.25	0.775	0.591495	0.264488	0.438385	0.647935	LAR					0.521406	0.244519	0.382251	0.575894	LAR					0.642546	0.270654	0.487077	0.697222	LAR					0.586492	0.263757	0.409863	0.643071	LAR					0.611722	0.265447	0.510496	0.666833	LAR
			0	0	0	0	0	0	0	LDA					0	0	0	0	LDA					0	0	0	0	LDA					0	0	0	0	LDA					0	0	0	0	LDA
			0	0	0	0	0	0	0	LDA					0	0	0	0	LDA					0	0	0	0	LDA					0	0	0	0	LDA					0	0	0	0	LDA
			0	0.25	0.25	-0.138802	0.0313431	0.0831098	0.142297	EVN					-0.150245	-0.00573665	0.0939922	0.150355	EVN					-0.143073	0.0535005	0.0644541	0.152748	EVN					-0.14096	0.0305121	0.0971217	0.144225	EVN					-0.131113	0.0340167	0.0276105	0.135454	EVN
			0.1	0	-0.1	0.112528	0.0389825	-0.0238323	0.119089	EVN					0.107684	0.0439799	-0.0281223	0.116319	EVN					0.121612	0.0376204	-0.0174961	0.127298	EVN					0.112878	0.039995	-0.0303314	0.119754	EVN					0.11318	0.0383766	-0.00490391	0.119509	EVN
			0	0	0	0	0	0	0	LDA					0	0	0	0	LDA					0	0	0	0	LDA					0	0	0	0	LDA					0	0	0	0	LDA
			0	0	0	0	0	0	0	LDA					0	0	0	0	LDA					0	0	0	0	LDA					0	0	0	0	LDA					0	0	0	0	LDA
			0.425	1.46667	-0.308333	-0.243692	0.402993	-0.184014	0.470945	EVN					-0.306001	0.227345	-0.0996155	0.381211	EVN					-0.218749	0.533799	-0.289655	0.576882	SML					-0.249054	0.41024	-0.134383	0.479921	EVN					-0.204241	0.413209	-0.418774	0.46093	SML
			0.25	0.125	0.375	0.177707	0.0933363	0.193198	0.200727	EVN					0.150464	0.0796422	0.173548	0.170242	EVN					0.194066	0.0985633	0.208275	0.217661	LAR					0.17535	0.092556	0.18579	0.198278	EVN					0.186306	0.0942297	0.208921	0.20878	LAR
			0	0	0	0	0	0	0	LDA					0	0	0	0	LDA					0	0	0	0	LDA					0	0	0	0	LDA					0	0	0	0	LDA
			0	0	0	0	0	0	0	LDA					0	0	0	0	LDA					0	0	0	0	LDA					0	0	0	0	LDA					0	0	0	0	LDA
			0.3	0	0.2	0.303372	0.0971561	0.139727	0.318549	EVN					0.279429	0.1045	0.112491	0.29833	EVN					0.326409	0.0906233	0.1673	0.338755	EVN					0.302269	0.0972974	0.122063	0.317542	EVN					0.308452	0.0964096	0.192664	0.323168	EVN
			0	0	0	0	0	0	0	LDA					0	0	0	0	LDA					0	0	0	0	LDA					0	0	0	0	LDA					0	0	0	0	LDA
			0	0	0	0	0	0	0	LDA					0	0	0	0	LDA					0	0	0	0	LDA					0	0	0	0	LDA					0	0	0	0	LDA
			0	0	0	0	0	0	0	LDA					0	0	0	0	LDA					0	0	0	0	LDA					0	0	0	0	LDA					0	0	0	0	LDA
			0.3	0.125	0.325	0.233971	0.112828	0.181282	0.259754	EVN					0.204306	0.101632	0.159487	0.228189	EVN					0.254872	0.117374	0.199527	0.2806	EVN					0.231788	0.112553	0.170624	0.257671	EVN					0.242896	0.113418	0.206469	0.268071	LAR
			0	0	0	0	0	0	0	LDA					0	0	0	0	LDA					0	0	0	0	LDA					0	0	0	0	LDA					0	0	0	0	LDA
			0	0	0	0	0	0	0	LDA					0	0	0	0	LDA					0	0	0	0	LDA					0	0	0	0	LDA					0	0	0	0	LDA
			0.125	0.166667	0.291667	0.0310193	0.0597278	0.131228	0.0673024	LDA					0.0126298	0.0374308	0.125938	0.0395041	LDA					0.0374195	0.0715735	0.130993	0.080765	LDA					0.0289414	0.0589913	0.133362	0.0657083	LDA					0.0385225	0.0612885	0.115965	0.0723896	LDA
			0	0.125	0.125	-0.069401	0.0156716	0.0415549	0.0711484	LDA					-0.0751227	-0.00286833	0.0469961	0.0751774	LDA					-0.0715363	0.0267502	0.032227	0.0763742	LDA					-0.0704801	0.015256	0.0485609	0.0721124	LDA					-0.0655564	0.0170084	0.0138052	0.0677268	LDA
			0.5	0.25	0.75	0.355414	0.186673	0.386396	0.401454	LAR					0.300928	0.159284	0.347097	0.340484	LAR					0.388132	0.197127	0.416549	0.435322	LAR					0.350699	0.185112	0.37158	0.396556	LAR					0.372611	0.188459	0.417842	0.41756	LAR
			1.35	0.625	0.275	1.1037	0.565039	0.308486	1.23992	LAR					0.990874	0.524508	0.249045	1.12113	LAR					1.20723	0.597151	0.364514	1.34684	LAR					1.09872	0.570838	0.259446	1.23816	LAR					1.13797	0.565685	0.417575	1.27082	LAR
			0.6	0.541667	0.441667	0.340217	0.282014	0.248301	0.441904	LAR					0.276949	0.224011	0.231774	0.356204	LAR					0.381255	0.319402	0.254462	0.497367	LAR					0.335487	0.283392	0.2415	0.439162	LAR					0.363915	0.285242	0.237775	0.462382	LAR
			0.25	0	0.25	0.247108	0.0776648	0.151643	0.259025	EVN					0.225587	0.0825105	0.126552	0.240203	EVN					0.265602	0.0718131	0.176048	0.275139	EVN					0.24583	0.0772999	0.137229	0.257697	EVN					0.251862	0.0772213	0.195116	0.263434	EVN
			0.125	0.125	0.25	0.0541529	0.0545039	0.117376	0.0768324	LDA					0.0376707	0.0383869	0.110272	0.0537832	LDA					0.0612649	0.0626568	0.120251	0.0876314	LDA					0.0524348	0.053906	0.117175	0.0752015	LDA					0.0603747	0.055619	0.111363	0.0820888	LDA
			0	0	0	0	0	0	0	LDA					0	0	0	0	LDA					0	0	0	0	LDA					0	0	0	0	LDA					0	0	0	0	LDA
			0	0.1	-0.1	-0.0418363	0.0204539	-0.0512456	0.0465686	LDA					-0.0426489	0.00868102	-0.0411463	0.0435235	LDA					-0.0418576	0.0302954	-0.0621335	0.0516707	LDA					-0.0418385	0.0212799	-0.0463744	0.0469392	LDA					-0.0400098	0.0210947	-0.071906	0.0452302	LDA
			0.125	0	0.125	0.123554	0.0388324	0.0758216	0.129513	EVN					0.112793	0.0412552	0.0632761	0.120101	EVN					0.132801	0.0359065	0.0880238	0.13757	EVN					0.122915	0.03865	0.0686146	0.128848	EVN					0.125931	0.0386107	0.0975579	0.131717	EVN
			0.85	0	-0.85	0.956485	0.331352	-0.202575	1.01225	SML					0.915314	0.373829	-0.23904	0.98871	SML					1.03371	0.319774	-0.148717	1.08204	EVN					0.95946	0.339958	-0.257817	1.01791	SML					0.962031	0.326201	-0.0416833	1.01583	EVN
			0.275	0	-0.025	0.292345	0.0973062	0.0400731	0.308114	EVN					0.274319	0.107225	0.0210927	0.294531	EVN					0.31522	0.0923372	0.0617797	0.328466	EVN					0.292231	0.0986425	0.0231175	0.308431	EVN					0.295701	0.0961755	0.090202	0.310948	EVN
			1.125	0.125	-0.75	1.17943	0.444329	-0.120946	1.26035	EVN					1.11451	0.478186	-0.170951	1.21276	EVN					1.27739	0.438861	-0.0547097	1.35067	EVN					1.18121	0.453856	-0.186139	1.2654	EVN					1.19218	0.439385	0.062324	1.27057	EVN
			0.475	0	0.275	0.483189	0.15548	0.203632	0.507588	LAR					0.446064	0.167746	0.161706	0.476563	EVN					0.520016	0.14534	0.246575	0.539945	LAR					0.481622	0.155945	0.175512	0.50624	EVN					0.490973	0.154209	0.28777	0.514621	LAR
			0.15	0	-0.15	0.168791	0.0584738	-0.0357484	0.178633	EVN					0.161526	0.0659698	-0.0421835	0.174478	EVN					0.182419	0.0564307	-0.0262441	0.190948	EVN					0.169316	0.0599925	-0.0454971	0.179631	EVN					0.16977	0.0575649	-0.00735587	0.179264	EVN
			0.45	0	0.05	0.472163	0.15563	0.103979	0.49715	EVN					0.440955	0.17047	0.0703077	0.472759	EVN					0.508827	0.147054	0.141056	0.529651	EVN					0.471585	0.15729	0.0765664	0.497124	EVN					0.478222	0.153974	0.185308	0.502399	EVN
			0	0	0	0	0	0	0	LDA					0	0	0	0	LDA					0	0	0	0	LDA					0	0	0	0	LDA					0	0	0	0	LDA
			0	0	0	0	0	0	0	LDA					0	0	0	0	LDA					0	0	0	0	LDA					0	0	0	0	LDA					0	0	0	0	LDA
			0	0	0	0	0	0	0	LDA					0	0	0	0	LDA					0	0	0	0	LDA					0	0	0	0	LDA					0	0	0	0	LDA
			0	0	0	0	0	0	0	LDA					0	0	0	0	LDA					0	0	0	0	LDA					0	0	0	0	LDA					0	0	0	0	LDA
			0	0.125	0.125	-0.069401	0.0156716	0.0415549	0.0711484	LDA					-0.0751227	-0.00286833	0.0469961	0.0751774	LDA					-0.0715363	0.0267502	0.032227	0.0763742	LDA					-0.0704801	0.015256	0.0485609	0.0721124	LDA					-0.0655564	0.0170084	0.0138052	0.0677268	LDA
			1.75	0.5	0.25	1.589	0.685506	0.382826	1.73056	LAR					1.45311	0.675857	0.286418	1.60259	LAR					1.72679	0.698645	0.48209	1.86277	LAR					1.58434	0.692874	0.302617	1.72923	LAR					1.62516	0.683463	0.591529	1.76303	LAR
			0	0	0	0	0	0	0	LDA					0	0	0	0	LDA					0	0	0	0	LDA					0	0	0	0	LDA					0	0	0	0	LDA
			0.25	0.541667	0.791667	-0.0536297	0.145575	0.331714	0.155139	LAR					-0.0999449	0.0700811	0.330202	0.122067	LAR					-0.0443882	0.187731	0.315698	0.192907	LAR					-0.0595841	0.143409	0.34766	0.155295	LAR					-0.0322156	0.150924	0.254939	0.154324	LAR
			1.1	0	-0.1	1.16938	0.389225	0.160293	1.23246	EVN					1.09728	0.4289	0.0843707	1.17812	EVN					1.26088	0.369349	0.247119	1.31386	LAR					1.16893	0.39457	0.0924699	1.23372	EVN					1.1828	0.384702	0.360808	1.24379	LAR
			0	0	0	0	0	0	0	LDA					0	0	0	0	LDA					0	0	0	0	LDA					0	0	0	0	LDA					0	0	0	0	LDA
			0.25	0	0.25	0.247108	0.0776648	0.151643	0.259025	EVN					0.225587	0.0825105	0.126552	0.240203	EVN					0.265602	0.0718131	0.176048	0.275139	EVN					0.24583	0.0772999	0.137229	0.257697	EVN					0.251862	0.0772213	0.195116	0.263434	EVN
			0.65	0.166667	-0.483333	0.638895	0.274282	-0.0995034	0.695282	EVN					0.599782	0.282045	-0.120134	0.662788	EVN					0.695099	0.2802	-0.070755	0.74945	EVN					0.639731	0.280309	-0.132406	0.698447	EVN					0.648262	0.272125	-0.0134684	0.703062	EVN
			0.45	0	-0.45	0.506374	0.175421	-0.107245	0.535899	EVN					0.484578	0.197909	-0.12655	0.523435	EVN					0.547256	0.169292	-0.0787323	0.572843	EVN					0.507949	0.179978	-0.136491	0.538892	EVN					0.50931	0.172695	-0.0220676	0.537792	EVN
			0.125	0	0.125	0.123554	0.0388324	0.0758216	0.129513	EVN					0.112793	0.0412552	0.0632761	0.120101	EVN					0.132801	0.0359065	0.0880238	0.13757	EVN					0.122915	0.03865	0.0686146	0.128848	EVN					0.125931	0.0386107	0.0975579	0.131717	EVN
			0	0	0	0	0	0	0	LDA					0	0	0	0	LDA					0	0	0	0	LDA					0	0	0	0	LDA					0	0	0	0	LDA
			0	0.125	0.125	-0.069401	0.0156716	0.0415549	0.0711484	LDA					-0.0751227	-0.00286833	0.0469961	0.0751774	LDA					-0.0715363	0.0267502	0.032227	0.0763742	LDA					-0.0704801	0.015256	0.0485609	0.0721124	LDA					-0.0655564	0.0170084	0.0138052	0.0677268	LDA
			0.325	0.125	0.05	0.279208	0.132469	0.0697119	0.309039	EVN					0.253039	0.126347	0.0540276	0.282829	EVN					0.30449	0.137898	0.0852587	0.33426	EVN					0.27819	0.133896	0.0565127	0.308736	EVN					0.286735	0.132372	0.101555	0.315815	EVN
			0	0	0	0	0	0	0	LDA					0	0	0	0	LDA					0	0	0	0	LDA					0	0	0	0	LDA					0	0	0	0	LDA
			0	0.125	0.125	-0.069401	0.0156716	0.0415549	0.0711484	LDA					-0.0751227	-0.00286833	0.0469961	0.0751774	LDA					-0.0715363	0.0267502	0.032227	0.0763742	LDA					-0.0704801	0.015256	0.0485609	0.0721124	LDA					-0.0655564	0.0170084	0.0138052	0.0677268	LDA
			0	0	0	0	0	0	0	LDA					0	0	0	0	LDA					0	0	0	0	LDA					0	0	0	0	LDA					0	0	0	0	LDA
			0.05	0	-0.05	0.0562638	0.0194913	-0.0119161	0.0595443	LDA					0.053842	0.0219899	-0.0140612	0.0581594	LDA					0.0608062	0.0188102	-0.00874803	0.0636492	LDA					0.0564388	0.0199975	-0.0151657	0.0598769	LDA					0.0565901	0.0191883	-0.00245196	0.0597547	LDA
			0.1	0.625	-0.475	-0.166055	0.156923	-0.238506	0.228471	SML					-0.180683	0.0845166	-0.186858	0.199473	EVN					-0.159212	0.215848	-0.295936	0.268214	SML					-0.166795	0.16165	-0.213642	0.232274	SML					-0.152425	0.160859	-0.350629	0.221605	SML
			0.275	0.125	0.1	0.222944	0.112978	0.081628	0.249936	EVN					0.199197	0.104357	0.0680888	0.224877	EVN					0.243684	0.119087	0.0940068	0.271226	EVN					0.221751	0.113899	0.0716783	0.249292	EVN					0.230145	0.113184	0.104007	0.256471	EVN
			0	0	0	0	0	0	0	LDA					0	0	0	0	LDA					0	0	0	0	LDA					0	0	0	0	LDA					0	0	0	0	LDA
			1.55	0.25	-0.3	1.53695	0.595989	0.136157	1.64846	EVN					1.43161	0.621073	0.0518125	1.56053	EVN					1.66506	0.592141	0.232841	1.76722	LAR					1.53591	0.60506	0.0531004	1.6508	EVN					1.561	0.591413	0.366351	1.66928	LAR
			0	0	0	0	0	0	0	LDA					0	0	0	0	LDA					0	0	0	0	LDA					0	0	0	0	LDA					0	0	0	0	LDA
			0	0	0	0	0	0	0	LDA					0	0	0	0	LDA					0	0	0	0	LDA					0	0	0	0	LDA					0	0	0	0	LDA
			1.025	1.70833	-1.06667	0.324667	0.683019	-0.415648	0.756257	SML					0.229765	0.50763	-0.334977	0.557208	SML					0.403365	0.829029	-0.508156	0.921951	SML					0.321041	0.697855	-0.392934	0.768159	SML					0.372968	0.691328	-0.587408	0.785518	SML
			0	0	0	0	0	0	0	LDA					0	0	0	0	LDA					0	0	0	0	LDA					0	0	0	0	LDA					0	0	0	0	LDA
			0	0	0	0	0	0	0	LDA					0	0	0	0	LDA					0	0	0	0	LDA					0	0	0	0	LDA					0	0	0	0	LDA
			0	0	0	0	0	0	0	LDA					0	0	0	0	LDA					0	0	0	0	LDA					0	0	0	0	LDA					0	0	0	0	LDA
			0.625	0	0.625	0.617769	0.194162	0.379108	0.647563	LAR					0.563967	0.206276	0.316381	0.600507	LAR					0.664006	0.179533	0.440119	0.687849	LAR					0.614575	0.19325	0.343073	0.644242	LAR					0.629655	0.193053	0.487789	0.658586	LAR
			0.275	0.125	0.1	0.222944	0.112978	0.081628	0.249936	EVN					0.199197	0.104357	0.0680888	0.224877	EVN					0.243684	0.119087	0.0940068	0.271226	EVN					0.221751	0.113899	0.0716783	0.249292	EVN					0.230145	0.113184	0.104007	0.256471	EVN
			0.35	0.125	0.275	0.290234	0.132319	0.169366	0.318974	EVN					0.258148	0.123622	0.145426	0.286222	EVN					0.315679	0.136184	0.190779	0.343801	EVN					0.288227	0.132551	0.155459	0.317246	EVN					0.299486	0.132606	0.204017	0.32753	LAR
			0	0	0	0	0	0	0	LDA					0	0	0	0	LDA					0	0	0	0	LDA					0	0	0	0	LDA					0	0	0	0	LDA
			0	0	0	0	0	0	0	LDA					0	0	0	0	LDA					0	0	0	0	LDA					0	0	0	0	LDA					0	0	0	0	LDA
			0	0	0	0	0	0	0	LDA					0	0	0	0	LDA					0	0	0	0	LDA					0	0	0	0	LDA					0	0	0	0	LDA
			1.475	0.833333	0.608333	1.11158	0.629991	0.453566	1.27769	LAR					0.978463	0.560983	0.390648	1.12787	LAR					1.2208	0.677641	0.50625	1.39627	LAR					1.10417	0.634914	0.408995	1.2737	LAR					1.15464	0.632643	0.538141	1.3166	LAR
			0.35	0.25	0.4	0.220833	0.14799	0.210921	0.265836	LAR					0.183025	0.120754	0.192422	0.219271	EVN					0.244142	0.162934	0.223006	0.293518	LAR					0.217747	0.147807	0.204019	0.263174	LAR					0.233929	0.149615	0.217822	0.277682	LAR
			0	0	0	0	0	0	0	LDA					0	0	0	0	LDA					0	0	0	0	LDA					0	0	0	0	LDA					0	0	0	0	LDA
			0	0	0	0	0	0	0	LDA					0	0	0	0	LDA					0	0	0	0	LDA					0	0	0	0	LDA					0	0	0	0	LDA
			0.5	0	0.5	0.494216	0.15533	0.303286	0.518051	LAR					0.451174	0.165021	0.253105	0.480406	LAR					0.531205	0.143626	0.352095	0.550279	LAR					0.49166	0.1546	0.274458	0.515393	LAR					0.503724	0.154443	0.390232	0.526869	LAR
			0.35	0	0.15	0.359635	0.116647	0.127811	0.37808	EVN					0.333271	0.12649	0.09843	0.356468	EVN					0.387215	0.109434	0.158552	0.402382	EVN					0.358707	0.117295	0.106898	0.377398	EVN					0.365042	0.115598	0.190212	0.382908	EVN
			0	0	0	0	0	0	0	LDA					0	0	0	0	LDA					0	0	0	0	LDA					0	0	0	0	LDA					0	0	0	0	LDA
			0	0	0	0	0	0	0	LDA					0	0	0	0	LDA					0	0	0	0	LDA					0	0	0	0	LDA					0	0	0	0	LDA
			0	0	0	0	0	0	0	LDA					0	0	0	0	LDA					0	0	0	0	LDA					0	0	0	0	LDA					0	0	0	0	LDA
			0.175	0.125	0.2	0.110417	0.0739952	0.10546	0.132918	EVN					0.0915127	0.0603768	0.0962111	0.109635	EVN					0.122071	0.081467	0.111503	0.146759	EVN					0.108874	0.0739035	0.10201	0.131587	EVN					0.116965	0.0748073	0.108911	0.138841	EVN
			0	0	0	0	0	0	0	LDA					0	0	0	0	LDA					0	0	0	0	LDA					0	0	0	0	LDA					0	0	0	0	LDA
			0	0	0	0	0	0	0	LDA					0	0	0	0	LDA					0	0	0	0	LDA					0	0	0	0	LDA					0	0	0	0	LDA
			2.025	0	-0.775	2.19316	0.739917	0.0454558	2.31461	EVN					2.07154	0.821994	-0.0773316	2.22867	EVN					2.36658	0.706219	0.195174	2.46971	EVN					2.19486	0.75318	-0.0815667	2.32049	EVN					2.21418	0.730325	0.419135	2.33151	LAR
			0.6	0.291667	0.191667	0.479019	0.250671	0.165192	0.540643	EVN					0.427194	0.229747	0.137782	0.485055	EVN					0.524328	0.265902	0.190008	0.587898	EVN					0.476448	0.25288	0.144378	0.539398	EVN					0.495028	0.251225	0.210164	0.555127	LAR
			0.175	0	0.075	0.179818	0.0583237	0.0639054	0.18904	EVN					0.166635	0.0632452	0.049215	0.178234	EVN					0.193607	0.0547168	0.0792758	0.201191	EVN					0.179354	0.0586475	0.0534489	0.188699	EVN					0.182521	0.0577989	0.0951059	0.191454	EVN
			1.125	0.5	0.625	0.902804	0.451761	0.426166	1.00953	LAR					0.801896	0.414702	0.363754	0.902782	LAR					0.985923	0.474636	0.481547	1.09422	LAR					0.897042	0.454249	0.385659	1.0055	LAR					0.93333	0.45297	0.518491	1.03744	LAR
			0.125	0	0.125	0.123554	0.0388324	0.0758216	0.129513	EVN					0.112793	0.0412552	0.0632761	0.120101	EVN					0.132801	0.0359065	0.0880238	0.13757	EVN					0.122915	0.03865	0.0686146	0.128848	EVN					0.125931	0.0386107	0.0975579	0.131717	EVN
			0.6	0.666667	1.06667	0.236605	0.277894	0.50108	0.364975	LAR					0.158203	0.193703	0.475628	0.250098	LAR					0.27129	0.323915	0.506477	0.422515	LAR					0.228643	0.27596	0.503118	0.358374	LAR					0.26727	0.28353	0.458956	0.389645	LAR
			0	0	0	0	0	0	0	LDA					0	0	0	0	LDA					0	0	0	0	LDA					0	0	0	0	LDA					0	0	0	0	LDA
			0.25	0	0.25	0.247108	0.0776648	0.151643	0.259025	EVN					0.225587	0.0825105	0.126552	0.240203	EVN					0.265602	0.0718131	0.176048	0.275139	EVN					0.24583	0.0772999	0.137229	0.257697	EVN					0.251862	0.0772213	0.195116	0.263434	EVN
			0.05	0.25	0.2	-0.0825381	0.0508344	0.0711936	0.0969364	LDA					-0.0964034	0.0162533	0.0799311	0.097764	LDA					-0.0822664	0.0723107	0.0557061	0.109529	EVN					-0.0845215	0.0505096	0.081956	0.0984637	LDA					-0.0745227	0.053205	0.0251585	0.0915664	LDA
			0	0	0	0	0	0	0	LDA					0	0	0	0	LDA					0	0	0	0	LDA					0	0	0	0	LDA					0	0	0	0	LDA
			0.95	0.333333	0.383333	0.815521	0.372542	0.306854	0.896583	LAR					0.735424	0.355282	0.251877	0.816746	LAR					0.887697	0.384252	0.359302	0.967293	LAR					0.811662	0.37526	0.267463	0.894212	LAR					0.838218	0.372493	0.404978	0.917257	LAR
			0.25	0	0.25	0.247108	0.0776648	0.151643	0.259025	EVN					0.225587	0.0825105	0.126552	0.240203	EVN					0.265602	0.0718131	0.176048	0.275139	EVN					0.24583	0.0772999	0.137229	0.257697	EVN					0.251862	0.0772213	0.195116	0.263434	EVN
			0	1	-1	-0.418363	0.204539	-0.512456	0.465686	SML					-0.426489	0.0868102	-0.411463	0.435234	SML					-0.418576	0.302954	-0.621335	0.516707	SML					-0.418385	0.212799	-0.463744	0.469392	SML					-0.400098	0.210947	-0.71906	0.452302	SML
			0	0	0	0	0	0	0	LDA					0	0	0	0	LDA					0	0	0	0	LDA					0	0	0	0	LDA					0	0	0	0	LDA
			0	0	0	0	0	0	0	LDA					0	0	0	0	LDA					0	0	0	0	LDA					0	0	0	0	LDA					0	0	0	0	LDA
			0	0	0	0	0	0	0	LDA					0	0	0	0	LDA					0	0	0	0	LDA					0	0	0	0	LDA					0	0	0	0	LDA
			1.8	0.5	1.2	1.57684	0.665414	0.793358	1.71149	LAR					1.4197	0.642968	0.666073	1.55852	LAR					1.71074	0.672979	0.912918	1.83835	LAR					1.56806	0.667496	0.713567	1.70422	LAR					1.61958	0.665211	1.00383	1.75087	LAR
			0	0	0	0	0	0	0	LDA					0	0	0	0	LDA					0	0	0	0	LDA					0	0	0	0	LDA					0	0	0	0	LDA
			0.375	0	0.375	0.370662	0.116497	0.227465	0.388538	LAR					0.33838	0.123766	0.189828	0.360304	EVN					0.398404	0.10772	0.264071	0.412709	LAR					0.368745	0.11595	0.205844	0.386545	LAR					0.377793	0.115832	0.292674	0.395151	LAR
			0.1	0.25	0.15	-0.0262743	0.0703257	0.0592775	0.0750735	LDA					-0.0425615	0.0382432	0.0658699	0.0572191	LDA					-0.0214602	0.0911209	0.046958	0.0936139	LDA					-0.0280827	0.0705071	0.0667903	0.0758939	LDA					-0.0179326	0.0723933	0.0227066	0.0745813	LDA
			0.7	0.625	-0.075	0.440688	0.351236	0.0409484	0.563536	EVN					0.378174	0.293517	0.0381244	0.478715	EVN					0.493606	0.397094	0.0386628	0.633506	EVN					0.437742	0.356245	0.0304845	0.564384	EVN					0.464479	0.353678	0.0346988	0.583805	EVN
			0	0	0	0	0	0	0	LDA					0	0	0	0	LDA					0	0	0	0	LDA					0	0	0	0	LDA					0	0	0	0	LDA
			0.45	0.2	-0.15	0.38849	0.196538	0.00148728	0.435376	EVN					0.355657	0.187832	-0.011985	0.40221	EVN					0.425112	0.207645	0.0167886	0.473114	EVN					0.387908	0.19985	-0.0161824	0.436363	EVN					0.398203	0.196164	0.0414959	0.443898	EVN
			0	0	0	0	0	0	0	LDA					0	0	0	0	LDA					0	0	0	0	LDA					0	0	0	0	LDA					0	0	0	0	LDA
			0.35	0	0.15	0.359635	0.116647	0.127811	0.37808	EVN					0.333271	0.12649	0.09843	0.356468	EVN					0.387215	0.109434	0.158552	0.402382	EVN					0.358707	0.117295	0.106898	0.377398	EVN					0.365042	0.115598	0.190212	0.382908	EVN
			0	0	0	0	0	0	0	LDA					0	0	0	0	LDA					0	0	0	0	LDA					0	0	0	0	LDA					0	0	0	0	LDA
			0.35	0.25	0.4	0.220833	0.14799	0.210921	0.265836	LAR					0.183025	0.120754	0.192422	0.219271	EVN					0.244142	0.162934	0.223006	0.293518	LAR					0.217747	0.147807	0.204019	0.263174	LAR					0.233929	0.149615	0.217822	0.277682	LAR
			0	0	0	0	0	0	0	LDA					0	0	0	0	LDA					0	0	0	0	LDA					0	0	0	0	LDA					0	0	0	0	LDA
			0	0.291667	0.291667	-0.161936	0.036567	0.0969614	0.166013	EVN					-0.175286	-0.00669276	0.109658	0.175414	EVN					-0.166918	0.0624172	0.0751964	0.178206	EVN					-0.164454	0.0355974	0.113309	0.168262	EVN					-0.152965	0.0396862	0.0322122	0.158029	EVN
			0	0	0	0	0	0	0	LDA					0	0	0	0	LDA					0	0	0	0	LDA					0	0	0	0	LDA					0	0	0	0	LDA
			0	0	0	0	0	0	0	LDA					0	0	0	0	LDA					0	0	0	0	LDA					0	0	0	0	LDA					0	0	0	0	LDA
			0.125	0.25	0.375	-0.015248	0.0701755	0.158931	0.071813	LDA					-0.037452	0.0355186	0.157268	0.0516161	LDA					-0.0102714	0.089407	0.152478	0.0899951	LDA					-0.0180454	0.069162	0.165736	0.0714774	LDA					-0.00518171	0.0726274	0.125168	0.072812	LDA
			0	0	0	0	0	0	0	LDA					0	0	0	0	LDA					0	0	0	0	LDA					0	0	0	0	LDA					0	0	0	0	LDA
			0.05	0	-0.05	0.0562638	0.0194913	-0.0119161	0.0595443	LDA					0.053842	0.0219899	-0.0140612	0.0581594	LDA					0.0608062	0.0188102	-0.00874803	0.0636492	LDA					0.0564388	0.0199975	-0.0151657	0.0598769	LDA					0.0565901	0.0191883	-0.00245196	0.0597547	LDA
			0	0	0	0	0	0	0	LDA					0	0	0	0	LDA					0	0	0	0	LDA					0	0	0	0	LDA					0	0	0	0	LDA
			0	0	0	0	0	0	0	LDA					0	0	0	0	LDA					0	0	0	0	LDA					0	0	0	0	LDA					0	0	0	0	LDA
			0.125	0.125	0.25	0.0541529	0.0545039	0.117376	0.0768324	LDA					0.0376707	0.0383869	0.110272	0.0537832	LDA					0.0612649	0.0626568	0.120251	0.0876314	LDA					0.0524348	0.053906	0.117175	0.0752015	LDA					0.0603747	0.055619	0.111363	0.0820888	LDA
			0.125	0	0.125	0.123554	0.0388324	0.0758216	0.129513	EVN					0.112793	0.0412552	0.0632761	0.120101	EVN					0.132801	0.0359065	0.0880238	0.13757	EVN					0.122915	0.03865	0.0686146	0.128848	EVN					0.125931	0.0386107	0.0975579	0.131717	EVN
			0.25	0.125	0.375	0.177707	0.0933363	0.193198	0.200727	EVN					0.150464	0.0796422	0.173548	0.170242	EVN					0.194066	0.0985633	0.208275	0.217661	LAR					0.17535	0.092556	0.18579	0.198278	EVN					0.186306	0.0942297	0.208921	0.20878	LAR
			0	0	0	0	0	0	0	LDA					0	0	0	0	LDA					0	0	0	0	LDA					0	0	0	0	LDA					0	0	0	0	LDA
			0.05	0	-0.05	0.0562638	0.0194913	-0.0119161	0.0595443	LDA					0.053842	0.0219899	-0.0140612	0.0581594	LDA					0.0608062	0.0188102	-0.00874803	0.0636492	LDA					0.0564388	0.0199975	-0.0151657	0.0598769	LDA					0.0565901	0.0191883	-0.00245196	0.0597547	LDA
			0	0	0	0	0	0	0	LDA					0	0	0	0	LDA					0	0	0	0	LDA					0	0	0	0	LDA					0	0	0	0	LDA
			0	0	0	0	0	0	0	LDA					0	0	0	0	LDA					0	0	0	0	LDA					0	0	0	0	LDA					0	0	0	0	LDA
			0.15	0	-0.15	0.168791	0.0584738	-0.0357484	0.178633	EVN					0.161526	0.0659698	-0.0421835	0.174478	EVN					0.182419	0.0564307	-0.0262441	0.190948	EVN					0.169316	0.0599925	-0.0454971	0.179631	EVN					0.16977	0.0575649	-0.00735587	0.179264	EVN
			0.25	0.333333	0.583333	0.0620386	0.119456	0.262456	0.134605	LAR					0.0252596	0.0748616	0.251875	0.0790083	LDA					0.0748389	0.143147	0.261986	0.16153	LAR					0.0578828	0.117983	0.266725	0.131417	LAR					0.0770451	0.122577	0.23193	0.144779	LAR
			1	0.25	0.75	0.88384	0.361794	0.478459	0.955023	LAR					0.795725	0.351744	0.403343	0.870001	LAR					0.957766	0.362991	0.548857	1.02424	LAR					0.878723	0.362399	0.432981	0.95052	LAR					0.907424	0.361622	0.600698	0.976826	LAR
			0	0	0	0	0	0	0	LDA					0	0	0	0	LDA					0	0	0	0	LDA					0	0	0	0	LDA					0	0	0	0	LDA
			0.3	0.125	0.325	0.233971	0.112828	0.181282	0.259754	EVN					0.204306	0.101632	0.159487	0.228189	EVN					0.254872	0.117374	0.199527	0.2806	EVN					0.231788	0.112553	0.170624	0.257671	EVN					0.242896	0.113418	0.206469	0.268071	LAR
			0.125	0	0.125	0.123554	0.0388324	0.0758216	0.129513	EVN					0.112793	0.0412552	0.0632761	0.120101	EVN					0.132801	0.0359065	0.0880238	0.13757	EVN					0.122915	0.03865	0.0686146	0.128848	EVN					0.125931	0.0386107	0.0975579	0.131717	EVN
			0	0	0	0	0	0	0	LDA					0	0	0	0	LDA					0	0	0	0	LDA					0	0	0	0	LDA					0	0	0	0	LDA
			0.4	0	-0.4	0.45011	0.15593	-0.0953292	0.476354	EVN					0.430736	0.175919	-0.112489	0.465275	EVN					0.48645	0.150482	-0.0699842	0.509194	EVN					0.45151	0.15998	-0.121326	0.479015	EVN					0.45272	0.153506	-0.0196157	0.478038	EVN
			0.3	1	-0.8	-0.114991	0.301695	-0.372729	0.322866	SML					-0.14706	0.191311	-0.298972	0.241302	SML					-0.0921669	0.393577	-0.454035	0.404225	SML					-0.116116	0.310096	-0.34168	0.331123	SML					-0.0916459	0.307357	-0.526396	0.320729	SML
			0.225	0	0.025	0.236081	0.0778149	0.0519893	0.248575	EVN					0.220477	0.0852351	0.0351538	0.23638	EVN					0.254414	0.073527	0.0705278	0.264825	EVN					0.235793	0.078645	0.0382832	0.248562	EVN					0.239111	0.0769872	0.092654	0.251199	EVN
			0.125	1	-0.875	-0.294809	0.243371	-0.436635	0.382285	SML					-0.313696	0.128065	-0.348187	0.33883	SML					-0.285774	0.338861	-0.533311	0.443276	SML					-0.29547	0.251449	-0.395129	0.38798	SML					-0.274167	0.249558	-0.621502	0.370738	SML
			0	0	0	0	0	0	0	LDA					0	0	0	0	LDA					0	0	0	0	LDA					0	0	0	0	LDA					0	0	0	0	LDA
			0.1	1	-1.1	-0.305835	0.243521	-0.536289	0.390945	SML					-0.318805	0.13079	-0.439586	0.344591	SML					-0.296963	0.340574	-0.638831	0.451861	SML					-0.305507	0.252794	-0.494075	0.396534	SML					-0.286918	0.249324	-0.723964	0.380111	SML
			0.05	0	-0.05	0.0562638	0.0194913	-0.0119161	0.0595443	LDA					0.053842	0.0219899	-0.0140612	0.0581594	LDA					0.0608062	0.0188102	-0.00874803	0.0636492	LDA					0.0564388	0.0199975	-0.0151657	0.0598769	LDA					0.0565901	0.0191883	-0.00245196	0.0597547	LDA
			1.75	0.5	0.25	1.589	0.685506	0.382826	1.73056	LAR					1.45311	0.675857	0.286418	1.60259	LAR					1.72679	0.698645	0.48209	1.86277	LAR					1.58434	0.692874	0.302617	1.72923	LAR					1.62516	0.683463	0.591529	1.76303	LAR
			0	0	0	0	0	0	0	LDA					0	0	0	0	LDA					0	0	0	0	LDA					0	0	0	0	LDA					0	0	0	0	LDA
			0	0	0	0	0	0	0	LDA					0	0	0	0	LDA					0	0	0	0	LDA					0	0	0	0	LDA					0	0	0	0	LDA
			0.175	0	0.075	0.179818	0.0583237	0.0639054	0.18904	EVN					0.166635	0.0632452	0.049215	0.178234	EVN					0.193607	0.0547168	0.0792758	0.201191	EVN					0.179354	0.0586475	0.0534489	0.188699	EVN					0.182521	0.0577989	0.0951059	0.191454	EVN
			0	0	0	0	0	0	0	LDA					0	0	0	0	LDA					0	0	0	0	LDA					0	0	0	0	LDA					0	0	0	0	LDA
			0.125	0.416667	0.541667	-0.107783	0.0910709	0.214338	0.141106	LAR					-0.137616	0.0316941	0.21993	0.141218	LAR					-0.105653	0.125074	0.195447	0.163726	EVN					-0.112019	0.0895034	0.230484	0.143384	LAR					-0.0925902	0.0953052	0.143575	0.132876	EVN
			0	0	0	0	0	0	0	LDA					0	0	0	0	LDA					0	0	0	0	LDA					0	0	0	0	LDA					0	0	0	0	LDA
			0.275	0.125	0.1	0.222944	0.112978	0.081628	0.249936	EVN					0.199197	0.104357	0.0680888	0.224877	EVN					0.243684	0.119087	0.0940068	0.271226	EVN					0.221751	0.113899	0.0716783	0.249292	EVN					0.230145	0.113184	0.104007	0.256471	EVN
			0.5	0.125	0.125	0.459026	0.190793	0.133617	0.497098	EVN					0.419674	0.189592	0.103243	0.460512	EVN					0.498097	0.192614	0.164535	0.534042	EVN					0.457544	0.192544	0.109962	0.496406	EVN					0.469256	0.190171	0.196661	0.506326	EVN
			0	0.525	-0.275	-0.236746	0.097487	-0.163428	0.256032	EVN					-0.245718	0.0318557	-0.117589	0.247775	EVN					-0.238967	0.147932	-0.216307	0.28105	SML					-0.237834	0.100376	-0.136937	0.258148	EVN					-0.225596	0.101387	-0.273819	0.247331	SML
			0.35	0	0.15	0.359635	0.116647	0.127811	0.37808	EVN					0.333271	0.12649	0.09843	0.356468	EVN					0.387215	0.109434	0.158552	0.402382	EVN					0.358707	0.117295	0.106898	0.377398	EVN					0.365042	0.115598	0.190212	0.382908	EVN
			0	0	0	0	0	0	0	LDA					0	0	0	0	LDA					0	0	0	0	LDA					0	0	0	0	LDA					0	0	0	0	LDA
			0.125	0.225	0.15	0.0123167	0.0749578	0.0661308	0.075963	LDA					-0.00497823	0.0470679	0.0691259	0.0473305	LDA					0.0194073	0.0929522	0.0581174	0.0949566	LDA					0.0105963	0.0751859	0.0708011	0.0759289	LDA					0.0203648	0.0767137	0.0394571	0.0793708	LDA
			0	0	0	0	0	0	0	LDA					0	0	0	0	LDA					0	0	0	0	LDA					0	0	0	0	LDA					0	0	0	0	LDA
			0.05	0.125	0.075	-0.0131372	0.0351628	0.0296387	0.0375368	LDA					-0.0212807	0.0191216	0.032935	0.0286095	LDA					-0.0107301	0.0455605	0.023479	0.0468069	LDA					-0.0140413	0.0352536	0.0333952	0.037947	LDA					-0.00896631	0.0361966	0.0113533	0.0372906	LDA
			0.55	0.416667	0.366667	0.353354	0.246851	0.218663	0.431039	LAR					0.29823	0.204889	0.198839	0.361829	EVN					0.391985	0.273842	0.230983	0.478165	LAR					0.349529	0.248138	0.208105	0.428653	LAR					0.372881	0.249046	0.226422	0.448402	LAR
			0.25	0	0.25	0.247108	0.0776648	0.151643	0.259025	EVN					0.225587	0.0825105	0.126552	0.240203	EVN					0.265602	0.0718131	0.176048	0.275139	EVN					0.24583	0.0772999	0.137229	0.257697	EVN					0.251862	0.0772213	0.195116	0.263434	EVN
			0.3	0.125	0.325	0.233971	0.112828	0.181282	0.259754	EVN					0.204306	0.101632	0.159487	0.228189	EVN					0.254872	0.117374	0.199527	0.2806	EVN					0.231788	0.112553	0.170624	0.257671	EVN					0.242896	0.113418	0.206469	0.268071	LAR
			0.175	0.725	0.6	-0.209023	0.157135	0.220434	0.2615	LAR					-0.251627	0.0575846	0.243049	0.258132	LAR					-0.205932	0.218763	0.178278	0.300442	EVN					-0.214885	0.156208	0.249879	0.265662	LAR					-0.185271	0.163935	0.0922261	0.247386	EVN
			0.375	0	0.375	0.370662	0.116497	0.227465	0.388538	LAR					0.33838	0.123766	0.189828	0.360304	EVN					0.398404	0.10772	0.264071	0.412709	LAR					0.368745	0.11595	0.205844	0.386545	LAR					0.377793	0.115832	0.292674	0.395151	LAR
			0.05	0.416667	0.366667	-0.175073	0.0717298	0.1266	0.189197	EVN					-0.196567	0.0124288	0.142593	0.19696	EVN					-0.177648	0.107978	0.0986755	0.207889	EVN					-0.178495	0.070851	0.146704	0.192043	EVN					-0.161931	0.0758828	0.0435655	0.178829	EVN
			0.875	0.25	0.625	0.760287	0.322961	0.402637	0.826039	LAR					0.682932	0.310489	0.340067	0.750199	LAR					0.824964	0.327084	0.460833	0.88744	LAR					0.755808	0.323749	0.364366	0.822229	LAR					0.781493	0.323011	0.50314	0.845616	LAR
			0	0	0	0	0	0	0	LDA					0	0	0	0	LDA					0	0	0	0	LDA					0	0	0	0	LDA					0	0	0	0	LDA
			0	0	0	0	0	0	0	LDA					0	0	0	0	LDA					0	0	0	0	LDA					0	0	0	0	LDA					0	0	0	0	LDA
			0	0	0	0	0	0	0	LDA					0	0	0	0	LDA					0	0	0	0	LDA					0	0	0	0	LDA					0	0	0	0	LDA
			0	0	0	0	0	0	0	LDA					0	0	0	0	LDA					0	0	0	0	LDA					0	0	0	0	LDA					0	0	0	0	LDA
			0.375	0.1	-0.225	0.363037	0.156743	-0.0350048	0.395429	EVN					0.339354	0.159886	-0.048176	0.375133	EVN					0.394975	0.160253	-0.0178498	0.426246	EVN					0.36327	0.159917	-0.0535883	0.396912	EVN					0.368871	0.155647	0.0133921	0.400365	EVN
			0	0.125	0.125	-0.069401	0.0156716	0.0415549	0.0711484	LDA					-0.0751227	-0.00286833	0.0469961	0.0751774	LDA					-0.0715363	0.0267502	0.032227	0.0763742	LDA					-0.0704801	0.015256	0.0485609	0.0721124	LDA					-0.0655564	0.0170084	0.0138052	0.0677268	LDA
			0.3	0	-0.3	0.337583	0.116948	-0.0714969	0.357266	EVN					0.323052	0.13194	-0.0843669	0.348956	EVN					0.364837	0.112861	-0.0524882	0.381895	EVN					0.338633	0.119985	-0.0909942	0.359261	EVN					0.33954	0.11513	-0.0147117	0.358528	EVN
			0.475	0	-0.225	0.5174	0.175271	-0.00759145	0.546281	EVN					0.489687	0.195185	-0.0351519	0.527153	EVN					0.558445	0.167578	0.0267876	0.583046	EVN					0.517986	0.178633	-0.0375453	0.547923	EVN					0.522061	0.172929	0.0803942	0.549957	EVN
[truncated: 9,765 more rows]
[truncated: 192 more columns]
